# Supplementary material
Source: publisher figshare collection journal article supplement (https://acs.figshare.com/ndownloader/files/21117588)
Supplement: Supplementary file 1 [file 21117588]

## Sheet: proteinGroups
Protein IDs	Majority protein IDs	Peptide counts (all)	Peptide counts (razor+unique)	Peptide counts (unique)	Protein names	Gene names	Fasta headers	Number of proteins	Peptides	Razor + unique peptides	Unique peptides	Peptides March20	Peptides March-blank	Peptides March-single1	Peptides March-single2	Peptides March-single3	Peptides May100	Peptides May-single	Razor + unique peptides March20	Razor + unique peptides March-blank	Razor + unique peptides March-single1	Razor + unique peptides March-single2	Razor + unique peptides March-single3	Razor + unique peptides May100	Razor + unique peptides May-single	Unique peptides March20	Unique peptides March-blank	Unique peptides March-single1	Unique peptides March-single2	Unique peptides March-single3	Unique peptides May100	Unique peptides May-single	Sequence coverage [%]	Unique + razor sequence coverage [%]	Unique sequence coverage [%]	Mol. weight [kDa]	Sequence length	Sequence lengths	Q-value	Score	Identification type March20	Identification type March-blank	Identification type March-single1	Identification type March-single2	Identification type March-single3	Identification type May100	Identification type May-single	Sequence coverage March20 [%]	Sequence coverage March-blank [%]
A0AVT1	A0AVT1	3	3	3	Ubiquitin-like modifier-activating enzyme 6	UBA6	sp|A0AVT1|UBA6_HUMAN Ubiquitin-like modifier-activating enzyme 6 OS=Homo sapiens OX=9606 GN=UBA6 PE=1 SV=1	1	3	3	3	0	0	0	0	0	3	0	0	0	0	0	0	3	0	0	0	0	0	0	3	0	2.8	2.8	2.8	117.97	1052	1052	0	4.8079						By MS/MS		0	0
A6NDG6	A6NDG6	3	3	3	Phosphoglycolate phosphatase	PGP	sp|A6NDG6|PGP_HUMAN Glycerol-3-phosphate phosphatase OS=Homo sapiens OX=9606 GN=PGP PE=1 SV=1	1	3	3	3	3	0	0	0	2	2	1	3	0	0	0	2	2	1	3	0	0	0	2	2	1	10.3	10.3	10.3	34.006	321	321	0	8.8587	By MS/MS				By matching	By MS/MS	By matching	10.3	0
P30046;A6NHG4	P30046;A6NHG4	3;3	3;3	3;3	D-dopachrome decarboxylase;D-dopachrome decarboxylase-like protein	DDT;DDTL	sp|P30046|DOPD_HUMAN D-dopachrome decarboxylase OS=Homo sapiens OX=9606 GN=DDT PE=1 SV=3;sp|A6NHG4|DDTL_HUMAN D-dopachrome decarboxylase-like protein OS=Homo sapiens OX=9606 GN=DDTL PE=2 SV=1	2	3	3	3	3	0	0	0	1	2	0	3	0	0	0	1	2	0	3	0	0	0	1	2	0	30.5	30.5	30.5	12.712	118	118;134	0	11.795	By MS/MS				By matching	By MS/MS		30.5	0
A6NHQ2	A6NHQ2	2	1	1	rRNA/tRNA 2-O-methyltransferase fibrillarin-like protein 1	FBLL1	sp|A6NHQ2|FBLL1_HUMAN rRNA/tRNA 2-O-methyltransferase fibrillarin-like protein 1 OS=Homo sapiens OX=9606 GN=FBLL1 PE=3 SV=2	1	2	1	1	1	0	1	0	1	2	1	0	0	0	0	0	1	0	0	0	0	0	0	1	0	6.6	3.3	3.3	34.803	334	334	0.0012555	2.1605	By matching		By matching		By matching	By MS/MS	By matching	3.3	0
A6NKF1	A6NKF1	1	1	1	SAC3 domain-containing protein 1	SAC3D1	sp|A6NKF1|SAC31_HUMAN SAC3 domain-containing protein 1 OS=Homo sapiens OX=9606 GN=SAC3D1 PE=1 SV=2	1	1	1	1	0	0	0	0	0	1	0	0	0	0	0	0	1	0	0	0	0	0	0	1	0	4.5	4.5	4.5	43.553	404	404	0.0096317	1.3471						By MS/MS		0	0
Q99613;B5ME19	Q99613;B5ME19	12;12	12;12	12;12	Eukaryotic translation initiation factor 3 subunit C;Eukaryotic translation initiation factor 3 subunit C-like protein	EIF3C;EIF3CL	sp|Q99613|EIF3C_HUMAN Eukaryotic translation initiation factor 3 subunit C OS=Homo sapiens OX=9606 GN=EIF3C PE=1 SV=1;sp|B5ME19|EIFCL_HUMAN Eukaryotic translation initiation factor 3 subunit C-like protein OS=Homo sapiens OX=9606 GN=EIF3CL PE=3 SV=1	2	12	12	12	8	0	1	3	5	9	0	8	0	1	3	5	9	0	8	0	1	3	5	9	0	12.8	12.8	12.8	105.34	913	913;914	0	29.135	By MS/MS		By matching	By matching	By matching	By MS/MS		8.1	0
B9ZVM9	B9ZVM9	1	1	1	Putative t-complex protein 10A homolog 2	TCP10L2	sp|B9ZVM9|TCP2L_HUMAN T-complex protein 10A homolog 2 OS=Homo sapiens OX=9606 GN=TCP10L2 PE=3 SV=2	1	1	1	1	1	0	0	0	0	1	0	1	0	0	0	0	1	0	1	0	0	0	0	1	0	2.3	2.3	2.3	38.357	353	353	0.0069767	1.4765	By matching					By MS/MS		2.3	0
CON__ENSEMBL:ENSBTAP00000018574	CON__ENSEMBL:ENSBTAP00000018574	1	1	1				1	1	1	1	0	0	0	0	0	1	0	0	0	0	0	0	1	0	0	0	0	0	0	1	0	3	3	3	55.207	496	496	0.0047933	1.7008						By MS/MS		0	0
CON__ENSEMBL:ENSBTAP00000024146	CON__ENSEMBL:ENSBTAP00000024146	4	4	4				1	4	4	4	0	0	0	0	0	4	0	0	0	0	0	0	4	0	0	0	0	0	0	4	0	3.1	3.1	3.1	164.34	1477	1477	0	7.5274						By MS/MS		0	0
CON__ENSEMBL:ENSBTAP00000025008	CON__ENSEMBL:ENSBTAP00000025008	6	2	2				1	6	2	2	4	0	4	2	3	6	4	0	0	0	0	0	2	0	0	0	0	0	0	2	0	9.7	4.3	4.3	59.299	536	536	0	4.0346	By matching		By matching	By matching	By matching	By MS/MS	By matching	5.4	0
CON__P00735;P00734	CON__P00735	11;5	11;5	11;5				2	11	11	11	1	0	1	1	1	11	0	1	0	1	1	1	11	0	1	0	1	1	1	11	0	20.8	20.8	20.8	70.505	625	625;622	0	87.774	By matching		By matching	By matching	By matching	By MS/MS		2.4	0
CON__P00761	CON__P00761	6	6	6				1	6	6	6	6	4	4	5	5	4	4	6	4	4	5	5	4	4	6	4	4	5	5	4	4	25.1	25.1	25.1	24.409	231	231	0	165.81	By MS/MS	By MS/MS	By MS/MS	By MS/MS	By MS/MS	By MS/MS	By MS/MS	25.1	25.1
CON__P01966;P69905;P02008	CON__P01966;P69905	8;4;1	8;4;1	8;4;1	Hemoglobin subunit alpha	HBA1	;sp|P69905|HBA_HUMAN Hemoglobin subunit alpha OS=Homo sapiens OX=9606 GN=HBA1 PE=1 SV=2	3	8	8	8	1	0	0	0	0	8	0	1	0	0	0	0	8	0	1	0	0	0	0	8	0	77.5	77.5	77.5	15.184	142	142;142;142	0	103.81	By MS/MS					By MS/MS		15.5	0
CON__P02533;P02533;CON__P08779;P08779;CON__A2A4G1;CON__Q9Z2K1;CON__Q3ZAW8;CON__Q61782;CON__P19012;P19012;CON__P35900;CON__Q9D312;P35900;CON__Q8N1A0;Q8N1A0;Q9ULK0	CON__P02533;P02533	24;24;10;10;7;7;7;6;6;6;4;4;4;1;1;1	3;3;0;0;0;0;0;1;0;0;0;0;0;0;0;0	2;2;0;0;0;0;0;1;0;0;0;0;0;0;0;0	Keratin, type I cytoskeletal 14	KRT14	;sp|P02533|K1C14_HUMAN Keratin, type I cytoskeletal 14 OS=Homo sapiens OX=9606 GN=KRT14 PE=1 SV=4	16	24	3	2	16	2	16	15	16	22	17	0	0	0	0	0	3	0	0	0	0	0	0	2	0	34.7	9.5	7.8	51.621	472	472;472;473;473;456;469;474;93;456;456;424;431;424;295;295;1009	0	6.8804	By matching	By matching	By matching	By matching	By matching	By MS/MS	By matching	17.8	4.2
CON__P48668;CON__P04259;CON__P02538;P48668;P02538	CON__P48668;CON__P04259;CON__P02538;P48668;P02538	16;16;16;16;16	1;1;1;1;1	0;0;0;0;0	Keratin, type II cytoskeletal 6C;Keratin, type II cytoskeletal 6A	KRT6C;KRT6A	;;;sp|P48668|K2C6C_HUMAN Keratin, type II cytoskeletal 6C OS=Homo sapiens OX=9606 GN=KRT6C PE=1 SV=3;sp|P02538|K2C6A_HUMAN Keratin, type II cytoskeletal 6A OS=Homo sapiens OX=9606 GN=KRT6A PE=1 SV=3	5	16	1	0	9	1	7	5	7	13	10	0	0	0	0	0	0	0	0	0	0	0	0	0	0	18.6	2.5	0	60.024	564	564;564;564;564;564	1	-2	By matching	By matching	By matching	By matching	By matching	By matching	By matching	6.2	1.6
CON__P02768-1;P02768	CON__P02768-1;P02768	6;6	2;2	2;2	Serum albumin	ALB	;sp|P02768|ALBU_HUMAN Serum albumin OS=Homo sapiens OX=9606 GN=ALB PE=1 SV=2	2	6	2	2	6	0	1	1	1	3	1	2	0	0	0	0	0	0	2	0	0	0	0	0	0	7.7	2.6	2.6	69.366	609	609;609	0.00068166	3.0181	By MS/MS		By matching	By matching	By matching	By matching	By matching	7.7	0
CON__P02769	CON__P02769	31	31	27				1	31	31	27	25	0	4	6	6	20	2	25	0	4	6	6	20	2	21	0	3	5	5	17	1	57.3	57.3	52.2	69.293	607	607	0	128.1	By MS/MS		By MS/MS	By MS/MS	By MS/MS	By MS/MS	By matching	45	0
CON__P02777	CON__P02777	3	3	3				1	3	3	3	0	0	0	0	0	3	0	0	0	0	0	0	3	0	0	0	0	0	0	3	0	18.7	18.7	18.7	24.241	230	230	0	4.3063						By MS/MS		0	0
CON__P05787;P05787;CON__H-INV:HIT000292931;CON__Q9H552;CON__H-INV:HIT000016045;CON__REFSEQ:XP_092267	CON__P05787;P05787	43;43;18;13;7;2	36;36;15;10;7;2	30;30;12;8;3;2	Keratin, type II cytoskeletal 8	KRT8	;sp|P05787|K2C8_HUMAN Keratin, type II cytoskeletal 8 OS=Homo sapiens OX=9606 GN=KRT8 PE=1 SV=7	6	43	36	30	41	6	30	30	36	33	31	34	5	26	25	31	28	27	28	4	20	21	25	22	21	81.6	74.1	70.4	53.704	483	483;483;443;499;99;213	0	323.31	By MS/MS	By MS/MS	By MS/MS	By MS/MS	By MS/MS	By MS/MS	By MS/MS	76.8	11.2
CON__P08727;P08727	CON__P08727;P08727	19;19	9;9	8;8	Keratin, type I cytoskeletal 19	KRT19	;sp|P08727|K1C19_HUMAN Keratin, type I cytoskeletal 19 OS=Homo sapiens OX=9606 GN=KRT19 PE=1 SV=4	2	19	9	8	16	2	14	13	19	15	8	7	0	5	5	9	7	0	7	0	5	5	8	7	0	40.5	26.8	24	44.091	400	400;400	0	49.586	By MS/MS	By matching	By matching	By MS/MS	By MS/MS	By MS/MS	By matching	36.2	3.8
CON__P08729;CON__Q9DCV7;CON__Q9NSB2;CON__Q6ISB0;Q9NSB2;CON__Q14CN4-1;CON__Q6IME9;Q14CN4;CON__Q61726;CON__O43790;CON__Q6NT21;CON__P78385;CON__Q14533;CON__Q3SY84;O43790;P78385;Q14533;Q3SY84	CON__P08729	43;10;5;5;5;4;4;4;2;2;2;2;2;2;2;2;2;2	39;6;2;2;2;4;4;4;0;0;0;0;0;2;0;0;0;2	4;0;0;0;0;0;0;0;0;0;0;0;0;0;0;0;0;0				18	43	39	4	40	2	31	31	35	37	30	36	1	28	28	32	34	27	4	0	2	2	3	4	2	67.6	64.4	2.1	51.417	469	469;457;600;600;600;511;520;511;479;486;493;493;505;523;486;493;505;523	0	323.31	By MS/MS	By matching	By MS/MS	By MS/MS	By MS/MS	By MS/MS	By MS/MS	65.2	3.4
CON__P12763;P02765	CON__P12763	6;1	6;1	6;1				2	6	6	6	6	0	5	4	4	2	0	6	0	5	4	4	2	0	6	0	5	4	4	2	0	24.2	24.2	24.2	38.418	359	359;367	0	44.693	By MS/MS		By MS/MS	By MS/MS	By matching	By MS/MS		24.2	0
CON__P13645;P13645;CON__P02535-1;CON__Q148H6;CON__Q7Z3Y7;Q7Z3Y7;CON__Q7Z3Z0;CON__Q7Z3Y8;Q7Z3Z0;Q7Z3Y8;CON__Q14525;CON__Q9UE12;CON__Q15323;CON__A2A5Y0;CON__Q14532;CON__A2AB72;CON__O76015;CON__O76013;CON__Q7Z3Y9;CON__O76014;CON__REFSEQ:XP_986630;CON__Q99456;Q14525;Q15323;Q14532;O76014;O76015;O76013;Q7Z3Y9;Q99456	CON__P13645;P13645	28;28;9;3;3;3;2;2;2;2;1;1;1;1;1;1;1;1;1;1;1;1;1;1;1;1;1;1;1;1	26;26;8;2;2;2;2;2;2;2;0;0;0;0;0;0;0;0;1;0;0;0;0;0;0;0;0;0;1;0	23;23;5;1;1;1;1;1;1;1;0;0;0;0;0;0;0;0;0;0;0;0;0;0;0;0;0;0;0;0	Keratin, type I cytoskeletal 10	KRT10	;sp|P13645|K1C10_HUMAN Keratin, type I cytoskeletal 10 OS=Homo sapiens OX=9606 GN=KRT10 PE=1 SV=6	30	28	26	23	18	6	15	15	10	23	16	16	5	13	13	8	21	14	14	5	11	11	8	18	11	49.6	47.2	43.7	59.51	593	593;584;570;464;486;464;450;459;450;459;404;416;416;416;448;453;456;467;468;471;476;494;404;416;448;449;456;467;468;494	0	183.18	By MS/MS	By MS/MS	By MS/MS	By MS/MS	By MS/MS	By MS/MS	By MS/MS	32.5	8.4
CON__P13647;P13647	CON__P13647;P13647	19;19	9;9	3;3	Keratin, type II cytoskeletal 5	KRT5	;sp|P13647|K2C5_HUMAN Keratin, type II cytoskeletal 5 OS=Homo sapiens OX=9606 GN=KRT5 PE=1 SV=3	2	19	9	3	9	0	7	4	7	15	10	1	0	1	0	1	7	3	0	0	0	0	0	3	1	23.2	15.8	5.9	62.378	590	590;590	0	38.019	By MS/MS		By matching	By matching	By MS/MS	By MS/MS	By MS/MS	6.1	0
CON__P15497	CON__P15497	7	7	7				1	7	7	7	0	0	0	0	0	7	0	0	0	0	0	0	7	0	0	0	0	0	0	7	0	21.1	21.1	21.1	30.276	265	265	0	28.122						By MS/MS		0	0
CON__P17697	CON__P17697	2	2	2				1	2	2	2	0	0	0	0	0	2	0	0	0	0	0	0	2	0	0	0	0	0	0	2	0	4.6	4.6	4.6	51.113	439	439	0	3.5775						By MS/MS		0	0
CON__P34955	CON__P34955	1	1	1				1	1	1	1	1	0	1	1	1	1	0	1	0	1	1	1	1	0	1	0	1	1	1	1	0	2.6	2.6	2.6	46.103	416	416	0	5.1406	By MS/MS		By matching	By matching	By matching	By MS/MS		2.6	0
CON__P35527;P35527	CON__P35527;P35527	9;9	8;8	8;8	Keratin, type I cytoskeletal 9	KRT9	;sp|P35527|K1C9_HUMAN Keratin, type I cytoskeletal 9 OS=Homo sapiens OX=9606 GN=KRT9 PE=1 SV=3	2	9	8	8	5	2	5	5	3	3	6	4	2	4	4	2	2	5	4	2	4	4	2	2	5	17.2	16.1	16.1	62.129	623	623;623	0	32.755	By MS/MS	By MS/MS	By MS/MS	By MS/MS	By MS/MS	By matching	By MS/MS	10.1	4.7
CON__P35908v2;CON__P35908;P35908;CON__Q7Z794;Q7Z794;CON__Q9R0H5	CON__P35908v2;CON__P35908;P35908	20;20;20;5;5;3	13;13;13;0;0;0	7;7;7;0;0;0	Keratin, type II cytoskeletal 2 epidermal	KRT2	;;sp|P35908|K22E_HUMAN Keratin, type II cytoskeletal 2 epidermal OS=Homo sapiens OX=9606 GN=KRT2 PE=1 SV=2	6	20	13	7	11	2	6	5	5	16	11	5	2	2	3	1	11	6	3	1	1	2	1	5	1	32.9	27.5	18.2	65.432	639	639;645;639;578;578;524	0	34.195	By MS/MS	By MS/MS	By MS/MS	By matching	By matching	By MS/MS	By MS/MS	21.3	3.8
CON__P41361	CON__P41361	1	1	1				1	1	1	1	1	0	0	0	0	1	0	1	0	0	0	0	1	0	1	0	0	0	0	1	0	2.6	2.6	2.6	52.347	465	465	0.00066181	2.6452	By matching					By MS/MS		2.6	0
CON__P78386;P78386	CON__P78386;P78386	3;3	1;1	1;1	Keratin, type II cuticular Hb5	KRT85	;sp|P78386|KRT85_HUMAN Keratin, type II cuticular Hb5 OS=Homo sapiens OX=9606 GN=KRT85 PE=1 SV=1	2	3	1	1	2	0	1	1	1	2	1	0	0	0	0	0	1	0	0	0	0	0	0	1	0	4.5	2.8	2.8	55.802	507	507;507	0.0070093	1.517	By matching		By matching	By matching	By matching	By MS/MS	By matching	1.8	0
CON__Q03247;P02649	CON__Q03247	3;1	3;1	3;1				2	3	3	3	1	0	0	1	0	3	0	1	0	0	1	0	3	0	1	0	0	1	0	3	0	8.5	8.5	8.5	35.979	316	316;317	0	6.6952	By matching			By matching		By MS/MS		2.2	0
CON__Q04695;Q04695;CON__Q9QWL7;CON__Q9C075;CON__Q99PS0;Q9C075	CON__Q04695;Q04695;CON__Q9QWL7	41;41;31;1;1;1	41;41;31;1;1;1	17;17;11;1;1;1	Keratin, type I cytoskeletal 17	KRT17	;sp|Q04695|K1C17_HUMAN Keratin, type I cytoskeletal 17 OS=Homo sapiens OX=9606 GN=KRT17 PE=1 SV=2;	6	41	41	17	33	3	31	30	34	36	34	33	3	31	30	34	36	34	14	0	12	12	14	14	14	75.7	75.7	45.4	48.105	432	432;432;433;422;422;422	0	323.31	By MS/MS	By MS/MS	By MS/MS	By MS/MS	By MS/MS	By MS/MS	By MS/MS	66	6.5
CON__Q29443;CON__Q0IIK2;P02788	CON__Q29443;CON__Q0IIK2	4;4;1	4;4;1	4;4;1			;	3	4	4	4	2	0	0	0	0	3	0	2	0	0	0	0	3	0	2	0	0	0	0	3	0	7.6	7.6	7.6	75.829	685	685;704;710	0	16.538	By MS/MS					By MS/MS		4.1	0
CON__Q28107	CON__Q28107	3	3	3				1	3	3	3	0	0	0	0	0	3	0	0	0	0	0	0	3	0	0	0	0	0	0	3	0	1.4	1.4	1.4	248.98	2211	2211	0	4.2956						By MS/MS		0	0
CON__Q2KIG3	CON__Q2KIG3	4	4	4				1	4	4	4	1	0	1	1	1	4	0	1	0	1	1	1	4	0	1	0	1	1	1	4	0	8.5	8.5	8.5	48.821	423	423	0	16.771	By matching		By matching	By matching	By matching	By MS/MS		2.4	0
CON__Q2M2I5;Q2M2I5	CON__Q2M2I5;Q2M2I5	3;3	1;1	1;1	Keratin, type I cytoskeletal 24	KRT24	;sp|Q2M2I5|K1C24_HUMAN Keratin, type I cytoskeletal 24 OS=Homo sapiens OX=9606 GN=KRT24 PE=1 SV=1	2	3	1	1	2	1	1	1	1	3	3	1	0	0	0	0	1	1	1	0	0	0	0	1	1	5.1	1.7	1.7	55.087	525	525;525	0	4.4947	By matching	By matching	By matching	By matching	By matching	By MS/MS	By MS/MS	3	1.3
CON__Q2UVX4	CON__Q2UVX4	1	1	1				1	1	1	1	0	0	0	0	0	1	0	0	0	0	0	0	1	0	0	0	0	0	0	1	0	0.6	0.6	0.6	187.37	1662	1662	0.0047876	1.6921						By MS/MS		0	0
CON__Q3KNV1;P08729	CON__Q3KNV1;P08729	42;42	3;3	3;3	Keratin, type II cytoskeletal 7	KRT7	;sp|P08729|K2C7_HUMAN Keratin, type II cytoskeletal 7 OS=Homo sapiens OX=9606 GN=KRT7 PE=1 SV=5	2	42	3	3	39	2	30	31	35	36	30	3	0	1	2	3	3	2	3	0	1	2	3	3	2	69.3	6.4	6.4	51.385	469	469;469	0	20.255	By MS/MS	By matching	By MS/MS	By MS/MS	By MS/MS	By MS/MS	By MS/MS	67	3.4
CON__Q3SX09;CON__P02070;P69892;P69891;P02100	CON__Q3SX09	11;3;1;1;1	11;3;1;1;1	9;2;0;0;0				5	11	11	9	3	0	0	0	0	11	1	3	0	0	0	0	11	1	3	0	0	0	0	9	1	51.2	51.2	41.8	22.06	201	201;145;147;147;147	0	100.42	By MS/MS					By MS/MS	By matching	19.9	0
CON__Q3SX28	CON__Q3SX28	17	7	3				1	17	7	3	9	0	9	9	9	17	11	3	0	3	3	3	7	5	1	0	1	1	1	3	2	36.3	21.8	7.7	33.012	284	284	0	68.615	By MS/MS		By MS/MS	By MS/MS	By MS/MS	By MS/MS	By MS/MS	20.8	0
CON__Q3ZBS7	CON__Q3ZBS7	5	5	5				1	5	5	5	0	0	0	0	0	5	0	0	0	0	0	0	5	0	0	0	0	0	0	5	0	9.9	9.9	9.9	54.099	484	484	0	19.916						By MS/MS		0	0
CON__Q6KB66-1;Q6KB66	CON__Q6KB66-1;Q6KB66	3;3	2;2	2;2	Keratin, type II cytoskeletal 80	KRT80	;sp|Q6KB66|K2C80_HUMAN Keratin, type II cytoskeletal 80 OS=Homo sapiens OX=9606 GN=KRT80 PE=1 SV=2	2	3	2	2	2	0	1	1	1	3	0	1	0	1	0	0	2	0	1	0	1	0	0	2	0	6.4	3.8	3.8	50.525	452	452;452	0.00066756	2.7166	By MS/MS		By matching	By matching	By matching	By MS/MS		4.6	0
D6RIA3	D6RIA3	1	1	1		LOC285556	sp|D6RIA3|CD054_HUMAN Uncharacterized protein C4orf54 OS=Homo sapiens OX=9606 GN=C4orf54 PE=2 SV=1	1	1	1	1	0	0	0	0	0	1	0	0	0	0	0	0	1	0	0	0	0	0	0	1	0	0.4	0.4	0.4	190.07	1793	1793	0.0069444	1.4423						By MS/MS		0	0
Q13765;E9PAV3;Q9BZK3	Q13765;E9PAV3	4;4;1	4;4;1	4;4;1	Nascent polypeptide-associated complex subunit alpha;Nascent polypeptide-associated complex subunit alpha, muscle-specific form	NACA	sp|Q13765|NACA_HUMAN Nascent polypeptide-associated complex subunit alpha OS=Homo sapiens OX=9606 GN=NACA PE=1 SV=1;sp|E9PAV3|NACAM_HUMAN Nascent polypeptide-associated complex subunit alpha, muscle-specific form OS=Homo sapiens OX=9606 GN=NACA PE=1 SV=1	3	4	4	4	4	0	2	2	4	3	1	4	0	2	2	4	3	1	4	0	2	2	4	3	1	25.6	25.6	25.6	23.384	215	215;2078;213	0	72.624	By MS/MS		By MS/MS	By MS/MS	By MS/MS	By MS/MS	By MS/MS	25.6	0
L0R6Q1	L0R6Q1	2	2	2		SLC35A4	sp|L0R6Q1|S35U4_HUMAN SLC35A4 upstream open reading frame protein OS=Homo sapiens OX=9606 GN=SLC35A4 PE=3 SV=1	1	2	2	2	1	0	0	0	1	2	0	1	0	0	0	1	2	0	1	0	0	0	1	2	0	16.5	16.5	16.5	11.133	103	103	0.00064226	2.3556	By matching				By matching	By MS/MS		7.8	0
O00116	O00116	4	4	4	Alkyldihydroxyacetonephosphate synthase, peroxisomal	AGPS	sp|O00116|ADAS_HUMAN Alkyldihydroxyacetonephosphate synthase, peroxisomal OS=Homo sapiens OX=9606 GN=AGPS PE=1 SV=1	1	4	4	4	3	0	1	0	1	3	0	3	0	1	0	1	3	0	3	0	1	0	1	3	0	7.6	7.6	7.6	72.911	658	658	0	5.5617	By MS/MS		By matching		By matching	By MS/MS		5.9	0
O00148	O00148	11	2	2	ATP-dependent RNA helicase DDX39A	DDX39A	sp|O00148|DX39A_HUMAN ATP-dependent RNA helicase DDX39A OS=Homo sapiens OX=9606 GN=DDX39A PE=1 SV=2	1	11	2	2	9	0	4	3	5	10	3	1	0	0	0	0	2	0	1	0	0	0	0	2	0	25.5	4.9	4.9	49.129	427	427	0	6.3448	By MS/MS		By matching	By matching	By matching	By MS/MS	By matching	21.8	0
O00151	O00151	6	6	6	PDZ and LIM domain protein 1	PDLIM1	sp|O00151|PDLI1_HUMAN PDZ and LIM domain protein 1 OS=Homo sapiens OX=9606 GN=PDLIM1 PE=1 SV=4	1	6	6	6	4	0	0	0	3	2	0	4	0	0	0	3	2	0	4	0	0	0	3	2	0	27.1	27.1	27.1	36.071	329	329	0	14.505	By MS/MS				By matching	By MS/MS		19.8	0
O00154;Q6ZUV0	O00154	4;1	4;1	4;1	Cytosolic acyl coenzyme A thioester hydrolase	ACOT7	sp|O00154|BACH_HUMAN Cytosolic acyl coenzyme A thioester hydrolase OS=Homo sapiens OX=9606 GN=ACOT7 PE=1 SV=3	2	4	4	4	1	0	0	0	0	4	2	1	0	0	0	0	4	2	1	0	0	0	0	4	2	10.3	10.3	10.3	41.796	380	380;252	0	7.5267	By MS/MS					By MS/MS	By matching	2.9	0
O00159	O00159	7	7	7	Unconventional myosin-Ic	MYO1C	sp|O00159|MYO1C_HUMAN Unconventional myosin-Ic OS=Homo sapiens OX=9606 GN=MYO1C PE=1 SV=4	1	7	7	7	4	0	1	1	4	5	0	4	0	1	1	4	5	0	4	0	1	1	4	5	0	7	7	7	121.68	1063	1063	0	17.267	By MS/MS		By matching	By matching	By MS/MS	By MS/MS		4.3	0
O00161	O00161	2	2	2	Synaptosomal-associated protein 23	SNAP23	sp|O00161|SNP23_HUMAN Synaptosomal-associated protein 23 OS=Homo sapiens OX=9606 GN=SNAP23 PE=1 SV=1	1	2	2	2	2	0	0	0	1	2	0	2	0	0	0	1	2	0	2	0	0	0	1	2	0	11.4	11.4	11.4	23.354	211	211	0	4.098	By MS/MS				By matching	By MS/MS		11.4	0
O00170	O00170	3	3	3	AH receptor-interacting protein	AIP	sp|O00170|AIP_HUMAN AH receptor-interacting protein OS=Homo sapiens OX=9606 GN=AIP PE=1 SV=2	1	3	3	3	0	0	0	1	0	3	0	0	0	0	1	0	3	0	0	0	0	1	0	3	0	12.1	12.1	12.1	37.636	330	330	0	4.4614				By matching		By MS/MS		0	0
O00231	O00231	18	18	18	26S proteasome non-ATPase regulatory subunit 11	PSMD11	sp|O00231|PSD11_HUMAN 26S proteasome non-ATPase regulatory subunit 11 OS=Homo sapiens OX=9606 GN=PSMD11 PE=1 SV=3	1	18	18	18	15	0	2	1	6	12	1	15	0	2	1	6	12	1	15	0	2	1	6	12	1	47.9	47.9	47.9	47.463	422	422	0	42.556	By MS/MS		By matching	By matching	By matching	By MS/MS	By matching	40.8	0
O00232	O00232	3	3	3	26S proteasome non-ATPase regulatory subunit 12	PSMD12	sp|O00232|PSD12_HUMAN 26S proteasome non-ATPase regulatory subunit 12 OS=Homo sapiens OX=9606 GN=PSMD12 PE=1 SV=3	1	3	3	3	1	0	0	0	0	3	0	1	0	0	0	0	3	0	1	0	0	0	0	3	0	9.4	9.4	9.4	52.904	456	456	0	10.994	By MS/MS					By MS/MS		2.9	0
O00233	O00233	4	4	4	26S proteasome non-ATPase regulatory subunit 9	PSMD9	sp|O00233|PSMD9_HUMAN 26S proteasome non-ATPase regulatory subunit 9 OS=Homo sapiens OX=9606 GN=PSMD9 PE=1 SV=3	1	4	4	4	2	0	0	0	1	4	0	2	0	0	0	1	4	0	2	0	0	0	1	4	0	18.8	18.8	18.8	24.682	223	223	0	6.4027	By MS/MS				By matching	By MS/MS		10.3	0
O00244	O00244	2	2	2	Copper transport protein ATOX1	ATOX1	sp|O00244|ATOX1_HUMAN Copper transport protein ATOX1 OS=Homo sapiens OX=9606 GN=ATOX1 PE=1 SV=1	1	2	2	2	1	0	0	0	1	2	0	1	0	0	0	1	2	0	1	0	0	0	1	2	0	13.2	13.2	13.2	7.4016	68	68	0	5.2551	By MS/MS				By matching	By MS/MS		13.2	0
O00264	O00264	5	4	4	Membrane-associated progesterone receptor component 1	PGRMC1	sp|O00264|PGRC1_HUMAN Membrane-associated progesterone receptor component 1 OS=Homo sapiens OX=9606 GN=PGRMC1 PE=1 SV=3	1	5	4	4	5	0	4	2	5	3	1	4	0	3	1	4	2	1	4	0	3	1	4	2	1	21.5	16.9	16.9	21.671	195	195	0	11.083	By MS/MS		By matching	By matching	By MS/MS	By MS/MS	By matching	21.5	0
O00273	O00273	2	2	2	DNA fragmentation factor subunit alpha	DFFA	sp|O00273|DFFA_HUMAN DNA fragmentation factor subunit alpha OS=Homo sapiens OX=9606 GN=DFFA PE=1 SV=1	1	2	2	2	1	0	1	1	0	2	0	1	0	1	1	0	2	0	1	0	1	1	0	2	0	8.5	8.5	8.5	36.521	331	331	0	9.819	By MS/MS		By matching	By matching		By MS/MS		3.6	0
O00299	O00299	11	11	11	Chloride intracellular channel protein 1	CLIC1	sp|O00299|CLIC1_HUMAN Chloride intracellular channel protein 1 OS=Homo sapiens OX=9606 GN=CLIC1 PE=1 SV=4	1	11	11	11	10	0	8	8	10	10	8	10	0	8	8	10	10	8	10	0	8	8	10	10	8	58.5	58.5	58.5	26.922	241	241	0	110.22	By MS/MS		By MS/MS	By MS/MS	By MS/MS	By MS/MS	By MS/MS	53.1	0
O00303	O00303	6	6	6	Eukaryotic translation initiation factor 3 subunit F	EIF3F	sp|O00303|EIF3F_HUMAN Eukaryotic translation initiation factor 3 subunit F OS=Homo sapiens OX=9606 GN=EIF3F PE=1 SV=1	1	6	6	6	3	0	2	2	3	5	0	3	0	2	2	3	5	0	3	0	2	2	3	5	0	22.7	22.7	22.7	37.563	357	357	0	37.933	By MS/MS		By matching	By matching	By MS/MS	By MS/MS		12.9	0
O00410;O60518	O00410	18;1	18;1	18;1	Importin-5	IPO5	sp|O00410|IPO5_HUMAN Importin-5 OS=Homo sapiens OX=9606 GN=IPO5 PE=1 SV=4	2	18	18	18	12	0	1	1	6	15	0	12	0	1	1	6	15	0	12	0	1	1	6	15	0	19.7	19.7	19.7	123.63	1097	1097;1105	0	106.38	By MS/MS		By matching	By matching	By matching	By MS/MS		12.4	0
O00425	O00425	4	4	3	Insulin-like growth factor 2 mRNA-binding protein 3	IGF2BP3	sp|O00425|IF2B3_HUMAN Insulin-like growth factor 2 mRNA-binding protein 3 OS=Homo sapiens OX=9606 GN=IGF2BP3 PE=1 SV=2	1	4	4	3	4	0	1	1	3	2	0	4	0	1	1	3	2	0	3	0	0	0	2	1	0	7.6	7.6	5.9	63.704	579	579	0	9.8778	By MS/MS		By matching	By matching	By MS/MS	By MS/MS		7.6	0
O00429	O00429	6	6	6	Dynamin-1-like protein	DNM1L	sp|O00429|DNM1L_HUMAN Dynamin-1-like protein OS=Homo sapiens OX=9606 GN=DNM1L PE=1 SV=2	1	6	6	6	2	0	0	0	2	6	1	2	0	0	0	2	6	1	2	0	0	0	2	6	1	9.6	9.6	9.6	81.876	736	736	0	16.834	By MS/MS				By matching	By MS/MS	By matching	2.6	0
O00461	O00461	1	1	1	Golgi integral membrane protein 4	GOLIM4	sp|O00461|GOLI4_HUMAN Golgi integral membrane protein 4 OS=Homo sapiens OX=9606 GN=GOLIM4 PE=1 SV=1	1	1	1	1	1	0	0	0	0	0	0	1	0	0	0	0	0	0	1	0	0	0	0	0	0	1.9	1.9	1.9	81.879	696	696	0.0012602	2.1738	By MS/MS							1.9	0
O00469	O00469	4	4	4	Procollagen-lysine,2-oxoglutarate 5-dioxygenase 2	PLOD2	sp|O00469|PLOD2_HUMAN Procollagen-lysine,2-oxoglutarate 5-dioxygenase 2 OS=Homo sapiens OX=9606 GN=PLOD2 PE=1 SV=2	1	4	4	4	2	0	1	0	0	3	0	2	0	1	0	0	3	0	2	0	1	0	0	3	0	6.5	6.5	6.5	84.685	737	737	0	8.0985	By MS/MS		By matching			By MS/MS		3.7	0
O00487	O00487	3	3	3	26S proteasome non-ATPase regulatory subunit 14	PSMD14	sp|O00487|PSDE_HUMAN 26S proteasome non-ATPase regulatory subunit 14 OS=Homo sapiens OX=9606 GN=PSMD14 PE=1 SV=1	1	3	3	3	2	0	0	0	1	2	0	2	0	0	0	1	2	0	2	0	0	0	1	2	0	13.9	13.9	13.9	34.577	310	310	0	5.1814	By MS/MS				By matching	By MS/MS		11.6	0
O00499	O00499	3	3	3	Myc box-dependent-interacting protein 1	BIN1	sp|O00499|BIN1_HUMAN Myc box-dependent-interacting protein 1 OS=Homo sapiens OX=9606 GN=BIN1 PE=1 SV=1	1	3	3	3	0	0	0	0	0	3	0	0	0	0	0	0	3	0	0	0	0	0	0	3	0	5.6	5.6	5.6	64.699	593	593	0	3.9383						By MS/MS		0	0
O00505	O00505	4	2	2	Importin subunit alpha-4	KPNA3	sp|O00505|IMA4_HUMAN Importin subunit alpha-4 OS=Homo sapiens OX=9606 GN=KPNA3 PE=1 SV=2	1	4	2	2	4	0	0	0	0	1	0	2	0	0	0	0	1	0	2	0	0	0	0	1	0	12.5	8.3	8.3	57.81	521	521	0	32.24	By MS/MS					By MS/MS		12.5	0
Q9P289;O00506;Q9Y6E0	Q9P289;O00506;Q9Y6E0	1;1;1	1;1;1	1;1;1	Serine/threonine-protein kinase 26;Serine/threonine-protein kinase 25;Serine/threonine-protein kinase 24;Serine/threonine-protein kinase 24 36 kDa subunit;Serine/threonine-protein kinase 24 12 kDa subunit	STK26;STK25;STK24	sp|Q9P289|STK26_HUMAN Serine/threonine-protein kinase 26 OS=Homo sapiens OX=9606 GN=STK26 PE=1 SV=2;sp|O00506|STK25_HUMAN Serine/threonine-protein kinase 25 OS=Homo sapiens OX=9606 GN=STK25 PE=1 SV=1;sp|Q9Y6E0|STK24_HUMAN Serine/threonine-protein kinase 24	3	1	1	1	1	0	0	0	1	0	0	1	0	0	0	1	0	0	1	0	0	0	1	0	0	3.8	3.8	3.8	46.528	416	416;426;443	0.0012563	2.1648	By MS/MS				By matching			3.8	0
O00541	O00541	4	4	4	Pescadillo homolog	PES1	sp|O00541|PESC_HUMAN Pescadillo homolog OS=Homo sapiens OX=9606 GN=PES1 PE=1 SV=1	1	4	4	4	2	0	1	1	1	4	0	2	0	1	1	1	4	0	2	0	1	1	1	4	0	7.7	7.7	7.7	68.002	588	588	0	10.546	By MS/MS		By matching	By matching	By matching	By MS/MS		4.4	0
O00567	O00567	7	7	7	Nucleolar protein 56	NOP56	sp|O00567|NOP56_HUMAN Nucleolar protein 56 OS=Homo sapiens OX=9606 GN=NOP56 PE=1 SV=4	1	7	7	7	3	0	0	1	2	6	0	3	0	0	1	2	6	0	3	0	0	1	2	6	0	12.3	12.3	12.3	66.049	594	594	0	13.4	By MS/MS			By matching	By matching	By MS/MS		5.9	0
O00571;O15523;Q9NQI0	O00571;O15523	22;16;1	21;15;1	21;15;1	ATP-dependent RNA helicase DDX3X;ATP-dependent RNA helicase DDX3Y	DDX3X;DDX3Y	sp|O00571|DDX3X_HUMAN ATP-dependent RNA helicase DDX3X OS=Homo sapiens OX=9606 GN=DDX3X PE=1 SV=3;sp|O15523|DDX3Y_HUMAN ATP-dependent RNA helicase DDX3Y OS=Homo sapiens OX=9606 GN=DDX3Y PE=1 SV=2	3	22	21	21	15	0	1	5	9	17	3	14	0	1	5	9	17	3	14	0	1	5	9	17	3	35.8	34.1	34.1	73.243	662	662;660;724	0	117.24	By MS/MS		By matching	By matching	By MS/MS	By MS/MS	By MS/MS	26	0
O00592	O00592	5	5	5	Podocalyxin	PODXL	sp|O00592|PODXL_HUMAN Podocalyxin OS=Homo sapiens OX=9606 GN=PODXL PE=1 SV=2	1	5	5	5	4	0	2	2	2	5	1	4	0	2	2	2	5	1	4	0	2	2	2	5	1	9.3	9.3	9.3	58.635	558	558	0	24.703	By MS/MS		By MS/MS	By matching	By MS/MS	By MS/MS	By matching	7.3	0
O00625	O00625	4	4	4	Pirin	PIR	sp|O00625|PIR_HUMAN Pirin OS=Homo sapiens OX=9606 GN=PIR PE=1 SV=1	1	4	4	4	3	0	0	0	2	0	0	3	0	0	0	2	0	0	3	0	0	0	2	0	0	15.5	15.5	15.5	32.113	290	290	0	6.4727	By MS/MS				By MS/MS			12.4	0
O00629	O00629	7	7	5	Importin subunit alpha-3	KPNA4	sp|O00629|IMA3_HUMAN Importin subunit alpha-3 OS=Homo sapiens OX=9606 GN=KPNA4 PE=1 SV=1	1	7	7	5	6	0	1	1	1	1	0	6	0	1	1	1	1	0	4	0	1	1	1	1	0	17.7	17.7	13.4	57.886	521	521	0	39.654	By MS/MS		By matching	By matching	By matching	By MS/MS		15	0
O00743	O00743	2	2	2	Serine/threonine-protein phosphatase 6 catalytic subunit;Serine/threonine-protein phosphatase 6 catalytic subunit, N-terminally processed	PPP6C	sp|O00743|PPP6_HUMAN Serine/threonine-protein phosphatase 6 catalytic subunit OS=Homo sapiens OX=9606 GN=PPP6C PE=1 SV=1	1	2	2	2	1	0	0	0	1	2	0	1	0	0	0	1	2	0	1	0	0	0	1	2	0	6.6	6.6	6.6	35.144	305	305	0	4.1345	By MS/MS				By matching	By MS/MS		3.9	0
O00764	O00764	4	4	4	Pyridoxal kinase	PDXK	sp|O00764|PDXK_HUMAN Pyridoxal kinase OS=Homo sapiens OX=9606 GN=PDXK PE=1 SV=1	1	4	4	4	4	0	1	0	3	3	0	4	0	1	0	3	3	0	4	0	1	0	3	3	0	17	17	17	35.102	312	312	0	13.23	By MS/MS		By matching		By matching	By MS/MS		17	0
O14684	O14684	2	2	2	Prostaglandin E synthase	PTGES	sp|O14684|PTGES_HUMAN Prostaglandin E synthase OS=Homo sapiens OX=9606 GN=PTGES PE=1 SV=2	1	2	2	2	1	0	1	0	1	2	0	1	0	1	0	1	2	0	1	0	1	0	1	2	0	11.8	11.8	11.8	17.102	152	152	0	6.3137	By MS/MS		By matching		By MS/MS	By MS/MS		6.6	0
O14737	O14737	6	6	6	Programmed cell death protein 5	PDCD5	sp|O14737|PDCD5_HUMAN Programmed cell death protein 5 OS=Homo sapiens OX=9606 GN=PDCD5 PE=1 SV=3	1	6	6	6	5	0	1	2	2	3	0	5	0	1	2	2	3	0	5	0	1	2	2	3	0	52.8	52.8	52.8	14.285	125	125	0	38.863	By MS/MS		By matching	By matching	By matching	By MS/MS		42.4	0
O14744	O14744	6	6	6	Protein arginine N-methyltransferase 5;Protein arginine N-methyltransferase 5, N-terminally processed	PRMT5	sp|O14744|ANM5_HUMAN Protein arginine N-methyltransferase 5 OS=Homo sapiens OX=9606 GN=PRMT5 PE=1 SV=4	1	6	6	6	3	0	0	1	2	5	0	3	0	0	1	2	5	0	3	0	0	1	2	5	0	8.8	8.8	8.8	72.683	637	637	0	10.598	By MS/MS			By matching	By matching	By MS/MS		4.6	0
O14745	O14745	8	8	8	Na(+)/H(+) exchange regulatory cofactor NHE-RF1	SLC9A3R1	sp|O14745|NHRF1_HUMAN Na(+)/H(+) exchange regulatory cofactor NHE-RF1 OS=Homo sapiens OX=9606 GN=SLC9A3R1 PE=1 SV=4	1	8	8	8	6	0	2	1	3	6	1	6	0	2	1	3	6	1	6	0	2	1	3	6	1	32.1	32.1	32.1	38.868	358	358	0	25.393	By MS/MS		By matching	By matching	By matching	By MS/MS	By matching	24.9	0
O14776	O14776	2	2	2	Transcription elongation regulator 1	TCERG1	sp|O14776|TCRG1_HUMAN Transcription elongation regulator 1 OS=Homo sapiens OX=9606 GN=TCERG1 PE=1 SV=2	1	2	2	2	0	0	0	0	0	2	0	0	0	0	0	0	2	0	0	0	0	0	0	2	0	1.6	1.6	1.6	123.9	1098	1098	0.0047962	1.7013						By MS/MS		0	0
O14818;Q8TAA3	O14818	9;3	9;3	9;3	Proteasome subunit alpha type-7	PSMA7	sp|O14818|PSA7_HUMAN Proteasome subunit alpha type-7 OS=Homo sapiens OX=9606 GN=PSMA7 PE=1 SV=1	2	9	9	9	7	0	4	4	5	7	4	7	0	4	4	5	7	4	7	0	4	4	5	7	4	46.4	46.4	46.4	27.887	248	248;256	0	53.859	By MS/MS		By MS/MS	By MS/MS	By MS/MS	By MS/MS	By MS/MS	37.1	0
O14828	O14828	2	2	2	Secretory carrier-associated membrane protein 3	SCAMP3	sp|O14828|SCAM3_HUMAN Secretory carrier-associated membrane protein 3 OS=Homo sapiens OX=9606 GN=SCAMP3 PE=1 SV=3	1	2	2	2	2	0	0	0	1	2	0	2	0	0	0	1	2	0	2	0	0	0	1	2	0	8.4	8.4	8.4	38.287	347	347	0	8.4727	By MS/MS				By matching	By MS/MS		8.4	0
O14880	O14880	1	1	1	Microsomal glutathione S-transferase 3	MGST3	sp|O14880|MGST3_HUMAN Microsomal glutathione S-transferase 3 OS=Homo sapiens OX=9606 GN=MGST3 PE=1 SV=1	1	1	1	1	0	0	0	0	0	1	0	0	0	0	0	0	1	0	0	0	0	0	0	1	0	8.6	8.6	8.6	16.516	152	152	0.0047818	1.6806						By MS/MS		0	0
O14907	O14907	1	1	1	Tax1-binding protein 3	TAX1BP3	sp|O14907|TX1B3_HUMAN Tax1-binding protein 3 OS=Homo sapiens OX=9606 GN=TAX1BP3 PE=1 SV=2	1	1	1	1	0	0	0	0	0	1	0	0	0	0	0	0	1	0	0	0	0	0	0	1	0	13.7	13.7	13.7	13.735	124	124	0.00066934	2.7612						By MS/MS		0	0
O14908	O14908	5	5	5	PDZ domain-containing protein GIPC1	GIPC1	sp|O14908|GIPC1_HUMAN PDZ domain-containing protein GIPC1 OS=Homo sapiens OX=9606 GN=GIPC1 PE=1 SV=2	1	5	5	5	1	0	0	0	1	5	0	1	0	0	0	1	5	0	1	0	0	0	1	5	0	20.1	20.1	20.1	36.049	333	333	0	14.309	By MS/MS				By matching	By MS/MS		4.8	0
O14929	O14929	4	4	4	Histone acetyltransferase type B catalytic subunit	HAT1	sp|O14929|HAT1_HUMAN Histone acetyltransferase type B catalytic subunit OS=Homo sapiens OX=9606 GN=HAT1 PE=1 SV=1	1	4	4	4	1	0	0	0	0	4	0	1	0	0	0	0	4	0	1	0	0	0	0	4	0	9.5	9.5	9.5	49.512	419	419	0	7.2796	By MS/MS					By MS/MS		2.4	0
O14949	O14949	2	2	2	Cytochrome b-c1 complex subunit 8	UQCRQ	sp|O14949|QCR8_HUMAN Cytochrome b-c1 complex subunit 8 OS=Homo sapiens OX=9606 GN=UQCRQ PE=1 SV=4	1	2	2	2	0	0	0	0	0	2	0	0	0	0	0	0	2	0	0	0	0	0	0	2	0	22	22	22	9.9062	82	82	0	3.8838						By MS/MS		0	0
P19105;O14950	P19105;O14950	7;7	7;7	4;4	Myosin regulatory light chain 12A;Myosin regulatory light chain 12B	MYL12A;MYL12B	sp|P19105|ML12A_HUMAN Myosin regulatory light chain 12A OS=Homo sapiens OX=9606 GN=MYL12A PE=1 SV=2;sp|O14950|ML12B_HUMAN Myosin regulatory light chain 12B OS=Homo sapiens OX=9606 GN=MYL12B PE=1 SV=2	2	7	7	4	6	0	5	3	5	7	6	6	0	5	3	5	7	6	3	0	3	2	2	4	3	42.1	42.1	24.6	19.794	171	171;172	0	78.271	By MS/MS		By MS/MS	By MS/MS	By MS/MS	By MS/MS	By MS/MS	30.4	0
O14964	O14964	2	2	2	Hepatocyte growth factor-regulated tyrosine kinase substrate	HGS	sp|O14964|HGS_HUMAN Hepatocyte growth factor-regulated tyrosine kinase substrate OS=Homo sapiens OX=9606 GN=HGS PE=1 SV=1	1	2	2	2	0	0	0	0	0	2	0	0	0	0	0	0	2	0	0	0	0	0	0	2	0	3.1	3.1	3.1	86.191	777	777	0	3.4179						By MS/MS		0	0
O14974	O14974	9	9	9	Protein phosphatase 1 regulatory subunit 12A	PPP1R12A	sp|O14974|MYPT1_HUMAN Protein phosphatase 1 regulatory subunit 12A OS=Homo sapiens OX=9606 GN=PPP1R12A PE=1 SV=1	1	9	9	9	2	0	0	0	0	8	0	2	0	0	0	0	8	0	2	0	0	0	0	8	0	9.9	9.9	9.9	115.28	1030	1030	0	21.734	By MS/MS					By MS/MS		2.6	0
O14979	O14979	7	6	6	Heterogeneous nuclear ribonucleoprotein D-like	HNRNPDL	sp|O14979|HNRDL_HUMAN Heterogeneous nuclear ribonucleoprotein D-like OS=Homo sapiens OX=9606 GN=HNRNPDL PE=1 SV=3	1	7	6	6	4	0	4	4	3	6	3	3	0	3	3	2	5	2	3	0	3	3	2	5	2	13.8	11.9	11.9	46.437	420	420	0	14.827	By MS/MS		By MS/MS	By MS/MS	By MS/MS	By MS/MS	By matching	9.5	0
O14980	O14980	8	8	8	Exportin-1	XPO1	sp|O14980|XPO1_HUMAN Exportin-1 OS=Homo sapiens OX=9606 GN=XPO1 PE=1 SV=1	1	8	8	8	3	0	1	0	1	7	1	3	0	1	0	1	7	1	3	0	1	0	1	7	1	8.5	8.5	8.5	123.38	1071	1071	0	62.851	By MS/MS		By matching		By matching	By MS/MS	By matching	3.7	0
O15027	O15027	1	1	1	Protein transport protein Sec16A	SEC16A	sp|O15027|SC16A_HUMAN Protein transport protein Sec16A OS=Homo sapiens OX=9606 GN=SEC16A PE=1 SV=3	1	1	1	1	0	0	0	0	0	1	0	0	0	0	0	0	1	0	0	0	0	0	0	1	0	0.7	0.7	0.7	233.51	2179	2179	0.0042399	1.7988						By MS/MS		0	0
O15042	O15042	2	2	2	U2 snRNP-associated SURP motif-containing protein	U2SURP	sp|O15042|SR140_HUMAN U2 snRNP-associated SURP motif-containing protein OS=Homo sapiens OX=9606 GN=U2SURP PE=1 SV=2	1	2	2	2	0	0	0	0	0	2	0	0	0	0	0	0	2	0	0	0	0	0	0	2	0	2.5	2.5	2.5	118.29	1029	1029	0	4.0716						By MS/MS		0	0
O15067	O15067	18	18	18	Phosphoribosylformylglycinamidine synthase	PFAS	sp|O15067|PUR4_HUMAN Phosphoribosylformylglycinamidine synthase OS=Homo sapiens OX=9606 GN=PFAS PE=1 SV=4	1	18	18	18	13	0	4	3	8	11	1	13	0	4	3	8	11	1	13	0	4	3	8	11	1	18.5	18.5	18.5	144.73	1338	1338	0	62.064	By MS/MS		By matching	By matching	By matching	By MS/MS	By matching	13.8	0
O15078	O15078	1	1	1	Centrosomal protein of 290 kDa	CEP290	sp|O15078|CE290_HUMAN Centrosomal protein of 290 kDa OS=Homo sapiens OX=9606 GN=CEP290 PE=1 SV=2	1	1	1	1	1	0	0	0	0	1	0	1	0	0	0	0	1	0	1	0	0	0	0	1	0	0.4	0.4	0.4	290.38	2479	2479	1	-2	By matching					By MS/MS		0.4	0
O15127	O15127	1	1	1	Secretory carrier-associated membrane protein 2	SCAMP2	sp|O15127|SCAM2_HUMAN Secretory carrier-associated membrane protein 2 OS=Homo sapiens OX=9606 GN=SCAMP2 PE=1 SV=2	1	1	1	1	1	0	0	0	0	0	0	1	0	0	0	0	0	0	1	0	0	0	0	0	0	3.6	3.6	3.6	36.648	329	329	0.0069485	1.4426	By MS/MS							3.6	0
O15143	O15143	10	10	10	Actin-related protein 2/3 complex subunit 1B	ARPC1B	sp|O15143|ARC1B_HUMAN Actin-related protein 2/3 complex subunit 1B OS=Homo sapiens OX=9606 GN=ARPC1B PE=1 SV=3	1	10	10	10	2	0	0	0	3	9	2	2	0	0	0	3	9	2	2	0	0	0	3	9	2	35.2	35.2	35.2	40.949	372	372	0	43.459	By MS/MS				By MS/MS	By MS/MS	By matching	8.6	0
O15144	O15144	13	13	13	Actin-related protein 2/3 complex subunit 2	ARPC2	sp|O15144|ARPC2_HUMAN Actin-related protein 2/3 complex subunit 2 OS=Homo sapiens OX=9606 GN=ARPC2 PE=1 SV=1	1	13	13	13	8	0	1	2	8	11	7	8	0	1	2	8	11	7	8	0	1	2	8	11	7	40.7	40.7	40.7	34.333	300	300	0	31.127	By MS/MS		By matching	By matching	By MS/MS	By MS/MS	By MS/MS	25.3	0
O15145	O15145	4	4	4	Actin-related protein 2/3 complex subunit 3	ARPC3	sp|O15145|ARPC3_HUMAN Actin-related protein 2/3 complex subunit 3 OS=Homo sapiens OX=9606 GN=ARPC3 PE=1 SV=3	1	4	4	4	2	1	0	1	2	4	1	2	1	0	1	2	4	1	2	1	0	1	2	4	1	20.2	20.2	20.2	20.546	178	178	0	5.5739	By MS/MS	By matching		By matching	By matching	By MS/MS	By matching	10.1	6.2
O15160	O15160	2	2	2	DNA-directed RNA polymerases I and III subunit RPAC1	POLR1C	sp|O15160|RPAC1_HUMAN DNA-directed RNA polymerases I and III subunit RPAC1 OS=Homo sapiens OX=9606 GN=POLR1C PE=1 SV=1	1	2	2	2	0	0	0	0	0	2	0	0	0	0	0	0	2	0	0	0	0	0	0	2	0	5.5	5.5	5.5	39.249	346	346	0	3.966						By MS/MS		0	0
O15173	O15173	5	5	4	Membrane-associated progesterone receptor component 2	PGRMC2	sp|O15173|PGRC2_HUMAN Membrane-associated progesterone receptor component 2 OS=Homo sapiens OX=9606 GN=PGRMC2 PE=1 SV=1	1	5	5	4	4	0	2	3	4	3	1	4	0	2	3	4	3	1	3	0	1	2	3	2	1	20.6	20.6	16.6	23.818	223	223	0	13.487	By MS/MS		By matching	By matching	By MS/MS	By MS/MS	By matching	17.9	0
O15212	O15212	7	7	7	Prefoldin subunit 6	PFDN6	sp|O15212|PFD6_HUMAN Prefoldin subunit 6 OS=Homo sapiens OX=9606 GN=PFDN6 PE=1 SV=1	1	7	7	7	5	0	2	4	4	4	1	5	0	2	4	4	4	1	5	0	2	4	4	4	1	53.5	53.5	53.5	14.582	129	129	0	34.149	By MS/MS		By matching	By matching	By MS/MS	By MS/MS	By matching	43.4	0
O15231	O15231	2	2	2	Zinc finger protein 185	ZNF185	sp|O15231|ZN185_HUMAN Zinc finger protein 185 OS=Homo sapiens OX=9606 GN=ZNF185 PE=1 SV=3	1	2	2	2	0	0	0	0	0	2	0	0	0	0	0	0	2	0	0	0	0	0	0	2	0	3.8	3.8	3.8	73.525	689	689	0	6.9851						By MS/MS		0	0
O15258	O15258	2	2	2	Protein RER1	RER1	sp|O15258|RER1_HUMAN Protein RER1 OS=Homo sapiens OX=9606 GN=RER1 PE=1 SV=1	1	2	2	2	0	0	0	0	0	2	0	0	0	0	0	0	2	0	0	0	0	0	0	2	0	14.8	14.8	14.8	22.958	196	196	0.00065789	2.5899						By MS/MS		0	0
O15294	O15294	2	2	2	UDP-N-acetylglucosamine--peptide N-acetylglucosaminyltransferase 110 kDa subunit	OGT	sp|O15294|OGT1_HUMAN UDP-N-acetylglucosamine--peptide N-acetylglucosaminyltransferase 110 kDa subunit OS=Homo sapiens OX=9606 GN=OGT PE=1 SV=3	1	2	2	2	0	0	0	0	0	2	0	0	0	0	0	0	2	0	0	0	0	0	0	2	0	3	3	3	116.92	1046	1046	0.0006854	3.1334						By MS/MS		0	0
O15305;Q92871	O15305	4;1	4;1	4;1	Phosphomannomutase 2	PMM2	sp|O15305|PMM2_HUMAN Phosphomannomutase 2 OS=Homo sapiens OX=9606 GN=PMM2 PE=1 SV=1	2	4	4	4	2	0	1	1	0	4	0	2	0	1	1	0	4	0	2	0	1	1	0	4	0	15.9	15.9	15.9	28.082	246	246;262	0	8.4256	By MS/MS		By matching	By matching		By MS/MS		9.3	0
O15347	O15347	2	2	2	High mobility group protein B3	HMGB3	sp|O15347|HMGB3_HUMAN High mobility group protein B3 OS=Homo sapiens OX=9606 GN=HMGB3 PE=1 SV=4	1	2	2	2	1	0	1	1	1	2	1	1	0	1	1	1	2	1	1	0	1	1	1	2	1	13.5	13.5	13.5	22.98	200	200	0	6.5036	By MS/MS		By matching	By matching	By matching	By MS/MS	By matching	7	0
O15355	O15355	8	8	8	Protein phosphatase 1G	PPM1G	sp|O15355|PPM1G_HUMAN Protein phosphatase 1G OS=Homo sapiens OX=9606 GN=PPM1G PE=1 SV=1	1	8	8	8	4	0	1	1	0	7	0	4	0	1	1	0	7	0	4	0	1	1	0	7	0	15.8	15.8	15.8	59.271	546	546	0	24.424	By MS/MS		By matching	By matching		By MS/MS		8.2	0
O15371	O15371	6	6	6	Eukaryotic translation initiation factor 3 subunit D	EIF3D	sp|O15371|EIF3D_HUMAN Eukaryotic translation initiation factor 3 subunit D OS=Homo sapiens OX=9606 GN=EIF3D PE=1 SV=1	1	6	6	6	2	1	1	2	2	6	0	2	1	1	2	2	6	0	2	1	1	2	2	6	0	9.7	9.7	9.7	63.972	548	548	0	12.683	By MS/MS	By matching	By matching	By matching	By matching	By MS/MS		4.2	1.6
O15372	O15372	5	5	5	Eukaryotic translation initiation factor 3 subunit H	EIF3H	sp|O15372|EIF3H_HUMAN Eukaryotic translation initiation factor 3 subunit H OS=Homo sapiens OX=9606 GN=EIF3H PE=1 SV=1	1	5	5	5	1	0	0	0	1	4	0	1	0	0	0	1	4	0	1	0	0	0	1	4	0	17.3	17.3	17.3	39.93	352	352	0	31.718	By MS/MS				By matching	By MS/MS		2.8	0
O15397	O15397	2	1	1	Importin-8	IPO8	sp|O15397|IPO8_HUMAN Importin-8 OS=Homo sapiens OX=9606 GN=IPO8 PE=1 SV=2	1	2	1	1	1	0	0	0	1	1	0	0	0	0	0	0	1	0	0	0	0	0	0	1	0	2.1	1.2	1.2	119.94	1037	1037	0	4.2829	By matching				By matching	By MS/MS		1	0
O15427	O15427	4	4	4	Monocarboxylate transporter 4	SLC16A3	sp|O15427|MOT4_HUMAN Monocarboxylate transporter 4 OS=Homo sapiens OX=9606 GN=SLC16A3 PE=1 SV=1	1	4	4	4	3	0	2	1	2	3	0	3	0	2	1	2	3	0	3	0	2	1	2	3	0	9.9	9.9	9.9	49.469	465	465	0	11.142	By MS/MS		By MS/MS	By MS/MS	By MS/MS	By MS/MS		7.1	0
O15460	O15460	1	1	1	Prolyl 4-hydroxylase subunit alpha-2	P4HA2	sp|O15460|P4HA2_HUMAN Prolyl 4-hydroxylase subunit alpha-2 OS=Homo sapiens OX=9606 GN=P4HA2 PE=1 SV=1	1	1	1	1	0	0	0	0	0	1	0	0	0	0	0	0	1	0	0	0	0	0	0	1	0	2.2	2.2	2.2	60.901	535	535	0.0006605	2.6246						By MS/MS		0	0
O15498	O15498	3	3	3	Synaptobrevin homolog YKT6	YKT6	sp|O15498|YKT6_HUMAN Synaptobrevin homolog YKT6 OS=Homo sapiens OX=9606 GN=YKT6 PE=1 SV=1	1	3	3	3	2	1	1	1	1	3	0	2	1	1	1	1	3	0	2	1	1	1	1	3	0	11.6	11.6	11.6	22.417	198	198	0	3.9404	By MS/MS	By matching	By MS/MS	By matching	By matching	By MS/MS		8.1	3.5
O15511	O15511	1	1	1	Actin-related protein 2/3 complex subunit 5	ARPC5	sp|O15511|ARPC5_HUMAN Actin-related protein 2/3 complex subunit 5 OS=Homo sapiens OX=9606 GN=ARPC5 PE=1 SV=3	1	1	1	1	1	0	1	0	1	1	1	1	0	1	0	1	1	1	1	0	1	0	1	1	1	7.9	7.9	7.9	16.32	151	151	0	4.7852	By MS/MS		By matching		By MS/MS	By MS/MS	By MS/MS	7.9	0
O43143	O43143	10	10	10	Pre-mRNA-splicing factor ATP-dependent RNA helicase DHX15	DHX15	sp|O43143|DHX15_HUMAN Pre-mRNA-splicing factor ATP-dependent RNA helicase DHX15 OS=Homo sapiens OX=9606 GN=DHX15 PE=1 SV=2	1	10	10	10	3	0	0	1	1	9	0	3	0	0	1	1	9	0	3	0	0	1	1	9	0	13	13	13	90.932	795	795	0	19.844	By MS/MS			By matching	By matching	By MS/MS		3.6	0
O43148	O43148	1	1	1	mRNA cap guanine-N7 methyltransferase	RNMT	sp|O43148|MCES_HUMAN mRNA cap guanine-N7 methyltransferase OS=Homo sapiens OX=9606 GN=RNMT PE=1 SV=1	1	1	1	1	0	0	0	0	0	1	0	0	0	0	0	0	1	0	0	0	0	0	0	1	0	2.1	2.1	2.1	54.843	476	476	0.009122	1.3665						By MS/MS		0	0
O43169	O43169	3	3	3	Cytochrome b5 type B	CYB5B	sp|O43169|CYB5B_HUMAN Cytochrome b5 type B OS=Homo sapiens OX=9606 GN=CYB5B PE=1 SV=2	1	3	3	3	1	0	1	1	2	2	1	1	0	1	1	2	2	1	1	0	1	1	2	2	1	18.5	18.5	18.5	16.332	146	146	0	7.9167	By MS/MS		By matching	By matching	By MS/MS	By MS/MS	By matching	8.2	0
O43175	O43175	16	16	16	D-3-phosphoglycerate dehydrogenase	PHGDH	sp|O43175|SERA_HUMAN D-3-phosphoglycerate dehydrogenase OS=Homo sapiens OX=9606 GN=PHGDH PE=1 SV=4	1	16	16	16	14	0	8	8	15	14	5	14	0	8	8	15	14	5	14	0	8	8	15	14	5	36.6	36.6	36.6	56.65	533	533	0	197.21	By MS/MS		By MS/MS	By MS/MS	By MS/MS	By MS/MS	By MS/MS	32.6	0
O43237	O43237	2	2	2	Cytoplasmic dynein 1 light intermediate chain 2	DYNC1LI2	sp|O43237|DC1L2_HUMAN Cytoplasmic dynein 1 light intermediate chain 2 OS=Homo sapiens OX=9606 GN=DYNC1LI2 PE=1 SV=1	1	2	2	2	1	0	0	0	1	1	0	1	0	0	0	1	1	0	1	0	0	0	1	1	0	4.9	4.9	4.9	54.099	492	492	0	5.0182	By MS/MS				By matching	By MS/MS		2.4	0
O43242	O43242	13	13	13	26S proteasome non-ATPase regulatory subunit 3	PSMD3	sp|O43242|PSMD3_HUMAN 26S proteasome non-ATPase regulatory subunit 3 OS=Homo sapiens OX=9606 GN=PSMD3 PE=1 SV=2	1	13	13	13	7	0	1	3	5	10	2	7	0	1	3	5	10	2	7	0	1	3	5	10	2	28.8	28.8	28.8	60.977	534	534	0	65.434	By MS/MS		By matching	By matching	By matching	By MS/MS	By matching	15.7	0
O43252	O43252	1	1	1	Bifunctional 3-phosphoadenosine 5-phosphosulfate synthase 1;Sulfate adenylyltransferase;Adenylyl-sulfate kinase	PAPSS1	sp|O43252|PAPS1_HUMAN Bifunctional 3-phosphoadenosine 5-phosphosulfate synthase 1 OS=Homo sapiens OX=9606 GN=PAPSS1 PE=1 SV=2	1	1	1	1	0	0	0	0	0	1	0	0	0	0	0	0	1	0	0	0	0	0	0	1	0	2.2	2.2	2.2	70.832	624	624	0.0069646	1.4662						By MS/MS		0	0
O43390	O43390	14	9	9	Heterogeneous nuclear ribonucleoprotein R	HNRNPR	sp|O43390|HNRPR_HUMAN Heterogeneous nuclear ribonucleoprotein R OS=Homo sapiens OX=9606 GN=HNRNPR PE=1 SV=1	1	14	9	9	8	0	7	8	6	10	5	6	0	5	6	4	5	2	6	0	5	6	4	5	2	24.3	16.4	16.4	70.942	633	633	0	23.238	By MS/MS		By MS/MS	By MS/MS	By matching	By MS/MS	By matching	14.2	0
O43395	O43395	3	3	3	U4/U6 small nuclear ribonucleoprotein Prp3	PRPF3	sp|O43395|PRPF3_HUMAN U4/U6 small nuclear ribonucleoprotein Prp3 OS=Homo sapiens OX=9606 GN=PRPF3 PE=1 SV=2	1	3	3	3	1	0	0	0	1	2	0	1	0	0	0	1	2	0	1	0	0	0	1	2	0	5	5	5	77.528	683	683	0	5.5395	By MS/MS				By MS/MS	By MS/MS		1.8	0
O43396	O43396	6	6	6	Thioredoxin-like protein 1	TXNL1	sp|O43396|TXNL1_HUMAN Thioredoxin-like protein 1 OS=Homo sapiens OX=9606 GN=TXNL1 PE=1 SV=3	1	6	6	6	3	0	0	1	1	5	0	3	0	0	1	1	5	0	3	0	0	1	1	5	0	31.5	31.5	31.5	32.251	289	289	0	27.913	By MS/MS			By matching	By matching	By MS/MS		13.8	0
O43399	O43399	8	8	8	Tumor protein D54	TPD52L2	sp|O43399|TPD54_HUMAN Tumor protein D54 OS=Homo sapiens OX=9606 GN=TPD52L2 PE=1 SV=2	1	8	8	8	6	0	2	1	4	8	2	6	0	2	1	4	8	2	6	0	2	1	4	8	2	45.1	45.1	45.1	22.237	206	206	0	116.01	By MS/MS		By MS/MS	By matching	By MS/MS	By MS/MS	By MS/MS	35.4	0
O43447	O43447	4	4	4	Peptidyl-prolyl cis-trans isomerase H	PPIH	sp|O43447|PPIH_HUMAN Peptidyl-prolyl cis-trans isomerase H OS=Homo sapiens OX=9606 GN=PPIH PE=1 SV=1	1	4	4	4	3	0	0	1	3	3	0	3	0	0	1	3	3	0	3	0	0	1	3	3	0	22.6	22.6	22.6	19.208	177	177	0	7.5437	By MS/MS			By matching	By matching	By MS/MS		18.1	0
O43491	O43491	1	1	1	Band 4.1-like protein 2	EPB41L2	sp|O43491|E41L2_HUMAN Band 4.1-like protein 2 OS=Homo sapiens OX=9606 GN=EPB41L2 PE=1 SV=1	1	1	1	1	1	0	0	0	0	1	0	1	0	0	0	0	1	0	1	0	0	0	0	1	0	0.9	0.9	0.9	112.59	1005	1005	0.00066534	2.6823	By matching					By MS/MS		0.9	0
O43504	O43504	1	1	1	Ragulator complex protein LAMTOR5	LAMTOR5	sp|O43504|LTOR5_HUMAN Ragulator complex protein LAMTOR5 OS=Homo sapiens OX=9606 GN=LAMTOR5 PE=1 SV=1	1	1	1	1	1	0	1	0	1	0	0	1	0	1	0	1	0	0	1	0	1	0	1	0	0	22	22	22	9.6138	91	91	0.0012706	2.2476	By MS/MS		By matching		By matching			22	0
O43516	O43516	1	1	1	WAS/WASL-interacting protein family member 1	WIPF1	sp|O43516|WIPF1_HUMAN WAS/WASL-interacting protein family member 1 OS=Homo sapiens OX=9606 GN=WIPF1 PE=1 SV=3	1	1	1	1	0	0	0	0	0	1	0	0	0	0	0	0	1	0	0	0	0	0	0	1	0	2	2	2	51.258	503	503	0.0053381	1.6223						By MS/MS		0	0
O43583	O43583	3	3	3	Density-regulated protein	DENR	sp|O43583|DENR_HUMAN Density-regulated protein OS=Homo sapiens OX=9606 GN=DENR PE=1 SV=2	1	3	3	3	1	0	0	0	1	3	1	1	0	0	0	1	3	1	1	0	0	0	1	3	1	17.7	17.7	17.7	22.092	198	198	0	4.995	By matching				By matching	By MS/MS	By matching	4	0
O43615	O43615	2	2	2	Mitochondrial import inner membrane translocase subunit TIM44	TIMM44	sp|O43615|TIM44_HUMAN Mitochondrial import inner membrane translocase subunit TIM44 OS=Homo sapiens OX=9606 GN=TIMM44 PE=1 SV=2	1	2	2	2	1	0	0	1	1	1	0	1	0	0	1	1	1	0	1	0	0	1	1	1	0	5.5	5.5	5.5	51.355	452	452	0	3.2572	By MS/MS			By matching	By matching	By MS/MS		3.3	0
O43670	O43670	3	3	3	BUB3-interacting and GLEBS motif-containing protein ZNF207	ZNF207	sp|O43670|ZN207_HUMAN BUB3-interacting and GLEBS motif-containing protein ZNF207 OS=Homo sapiens OX=9606 GN=ZNF207 PE=1 SV=1	1	3	3	3	2	0	1	1	1	3	0	2	0	1	1	1	3	0	2	0	1	1	1	3	0	6.9	6.9	6.9	50.75	478	478	0	27.1	By MS/MS		By matching	By matching	By matching	By MS/MS		5.2	0
O43681	O43681	1	1	1	ATPase ASNA1	ASNA1	sp|O43681|ASNA_HUMAN ATPase ASNA1 OS=Homo sapiens OX=9606 GN=ASNA1 PE=1 SV=2	1	1	1	1	1	0	0	0	1	1	0	1	0	0	0	1	1	0	1	0	0	0	1	1	0	2.6	2.6	2.6	38.792	348	348	0.0053286	1.6184	By MS/MS				By matching	By MS/MS		2.6	0
O43684	O43684	7	7	7	Mitotic checkpoint protein BUB3	BUB3	sp|O43684|BUB3_HUMAN Mitotic checkpoint protein BUB3 OS=Homo sapiens OX=9606 GN=BUB3 PE=1 SV=1	1	7	7	7	3	0	2	2	2	7	2	3	0	2	2	2	7	2	3	0	2	2	2	7	2	26.8	26.8	26.8	37.154	328	328	0	51.139	By MS/MS		By matching	By matching	By matching	By MS/MS	By matching	11	0
O43707;Q9H254	O43707	58;1	58;1	40;1	Alpha-actinin-4	ACTN4	sp|O43707|ACTN4_HUMAN Alpha-actinin-4 OS=Homo sapiens OX=9606 GN=ACTN4 PE=1 SV=2	2	58	58	40	48	1	30	32	47	54	32	48	1	30	32	47	54	32	33	1	20	21	32	37	20	71.9	71.9	50.1	104.85	911	911;2564	0	323.31	By MS/MS	By matching	By MS/MS	By MS/MS	By MS/MS	By MS/MS	By MS/MS	60.3	1.1
O43747	O43747	2	2	2	AP-1 complex subunit gamma-1	AP1G1	sp|O43747|AP1G1_HUMAN AP-1 complex subunit gamma-1 OS=Homo sapiens OX=9606 GN=AP1G1 PE=1 SV=5	1	2	2	2	0	0	0	0	0	2	0	0	0	0	0	0	2	0	0	0	0	0	0	2	0	2.9	2.9	2.9	91.35	822	822	0.00068074	2.9966						By MS/MS		0	0
O43765	O43765	2	2	2	Small glutamine-rich tetratricopeptide repeat-containing protein alpha	SGTA	sp|O43765|SGTA_HUMAN Small glutamine-rich tetratricopeptide repeat-containing protein alpha OS=Homo sapiens OX=9606 GN=SGTA PE=1 SV=1	1	2	2	2	0	0	0	0	0	2	0	0	0	0	0	0	2	0	0	0	0	0	0	2	0	7	7	7	34.063	313	313	0	9.4861						By MS/MS		0	0
O43768	O43768	3	3	2	Alpha-endosulfine	ENSA	sp|O43768|ENSA_HUMAN Alpha-endosulfine OS=Homo sapiens OX=9606 GN=ENSA PE=1 SV=1	1	3	3	2	2	0	0	0	0	3	0	2	0	0	0	0	3	0	2	0	0	0	0	2	0	30.6	30.6	21.5	13.389	121	121	0	3.5013	By matching					By MS/MS		21.5	0
O43776	O43776	8	8	8	Asparagine--tRNA ligase, cytoplasmic	NARS	sp|O43776|SYNC_HUMAN Asparagine--tRNA ligase, cytoplasmic OS=Homo sapiens OX=9606 GN=NARS PE=1 SV=1	1	8	8	8	3	0	0	0	1	5	0	3	0	0	0	1	5	0	3	0	0	0	1	5	0	16.1	16.1	16.1	62.942	548	548	0	32.358	By MS/MS				By matching	By MS/MS		6.6	0
O43809	O43809	1	1	1	Cleavage and polyadenylation specificity factor subunit 5	NUDT21	sp|O43809|CPSF5_HUMAN Cleavage and polyadenylation specificity factor subunit 5 OS=Homo sapiens OX=9606 GN=NUDT21 PE=1 SV=1	1	1	1	1	1	0	1	1	1	0	0	1	0	1	1	1	0	0	1	0	1	1	1	0	0	5.3	5.3	5.3	26.227	227	227	0.00068681	3.1433	By MS/MS		By matching	By matching	By MS/MS			5.3	0
O43813	O43813	2	2	2	LanC-like protein 1	LANCL1	sp|O43813|LANC1_HUMAN LanC-like protein 1 OS=Homo sapiens OX=9606 GN=LANCL1 PE=1 SV=1	1	2	2	2	0	0	0	0	0	2	0	0	0	0	0	0	2	0	0	0	0	0	0	2	0	6.5	6.5	6.5	45.283	399	399	0	4.2281						By MS/MS		0	0
O43818	O43818	1	1	1	U3 small nucleolar RNA-interacting protein 2	RRP9	sp|O43818|U3IP2_HUMAN U3 small nucleolar RNA-interacting protein 2 OS=Homo sapiens OX=9606 GN=RRP9 PE=1 SV=1	1	1	1	1	1	0	0	0	0	1	0	1	0	0	0	0	1	0	1	0	0	0	0	1	0	2.1	2.1	2.1	51.84	475	475	0.00064851	2.4523	By matching					By MS/MS		2.1	0
O43837	O43837	1	1	1	Isocitrate dehydrogenase [NAD] subunit beta, mitochondrial	IDH3B	sp|O43837|IDH3B_HUMAN Isocitrate dehydrogenase [NAD] subunit beta, mitochondrial OS=Homo sapiens OX=9606 GN=IDH3B PE=1 SV=2	1	1	1	1	0	0	0	0	0	1	0	0	0	0	0	0	1	0	0	0	0	0	0	1	0	4.2	4.2	4.2	42.183	385	385	0.0012461	2.0853						By MS/MS		0	0
O43847	O43847	4	4	4	Nardilysin	NRD1	sp|O43847|NRDC_HUMAN Nardilysin OS=Homo sapiens OX=9606 GN=NRDC PE=1 SV=3	1	4	4	4	2	0	1	0	1	3	0	2	0	1	0	1	3	0	2	0	1	0	1	3	0	3.8	3.8	3.8	131.7	1151	1151	0	9.9929	By MS/MS		By matching		By matching	By MS/MS		2	0
O43852	O43852	13	13	13	Calumenin	CALU	sp|O43852|CALU_HUMAN Calumenin OS=Homo sapiens OX=9606 GN=CALU PE=1 SV=2	1	13	13	13	5	0	6	6	7	12	4	5	0	6	6	7	12	4	5	0	6	6	7	12	4	46.3	46.3	46.3	37.106	315	315	0	128.27	By MS/MS		By MS/MS	By MS/MS	By MS/MS	By MS/MS	By MS/MS	18.4	0
O43865;Q96HN2	O43865;Q96HN2	3;3	3;3	3;3	Putative adenosylhomocysteinase 2;Putative adenosylhomocysteinase 3	AHCYL1;AHCYL2	sp|O43865|SAHH2_HUMAN S-adenosylhomocysteine hydrolase-like protein 1 OS=Homo sapiens OX=9606 GN=AHCYL1 PE=1 SV=2;sp|Q96HN2|SAHH3_HUMAN Adenosylhomocysteinase 3 OS=Homo sapiens OX=9606 GN=AHCYL2 PE=1 SV=1	2	3	3	3	1	0	0	0	1	3	0	1	0	0	0	1	3	0	1	0	0	0	1	3	0	5.3	5.3	5.3	58.951	530	530;611	0	12.142	By MS/MS				By matching	By MS/MS		2.3	0
O60220	O60220	2	2	2	Mitochondrial import inner membrane translocase subunit Tim8 A	TIMM8A	sp|O60220|TIM8A_HUMAN Mitochondrial import inner membrane translocase subunit Tim8 A OS=Homo sapiens OX=9606 GN=TIMM8A PE=1 SV=1	1	2	2	2	2	0	0	1	2	2	0	2	0	0	1	2	2	0	2	0	0	1	2	2	0	22.7	22.7	22.7	10.998	97	97	0	5.5249	By MS/MS			By matching	By MS/MS	By MS/MS		22.7	0
P60983;O60234	P60983;O60234	1;1	1;1	1;1	Glia maturation factor beta;Glia maturation factor gamma	GMFB;GMFG	sp|P60983|GMFB_HUMAN Glia maturation factor beta OS=Homo sapiens OX=9606 GN=GMFB PE=1 SV=2;sp|O60234|GMFG_HUMAN Glia maturation factor gamma OS=Homo sapiens OX=9606 GN=GMFG PE=1 SV=1	2	1	1	1	1	0	0	0	1	1	1	1	0	0	0	1	1	1	1	0	0	0	1	1	1	6.3	6.3	6.3	16.713	142	142;142	0.0042657	1.8241	By MS/MS				By matching	By MS/MS	By matching	6.3	0
O60256	O60256	2	2	1	Phosphoribosyl pyrophosphate synthase-associated protein 2	PRPSAP2	sp|O60256|KPRB_HUMAN Phosphoribosyl pyrophosphate synthase-associated protein 2 OS=Homo sapiens OX=9606 GN=PRPSAP2 PE=1 SV=1	1	2	2	1	2	0	1	0	0	2	0	2	0	1	0	0	2	0	1	0	0	0	0	1	0	6.2	6.2	2.4	40.925	369	369	0	8.1577	By MS/MS		By matching			By MS/MS		6.2	0
O60264;P28370	O60264;P28370	6;3	6;3	6;3	SWI/SNF-related matrix-associated actin-dependent regulator of chromatin subfamily A member 5;Probable global transcription activator SNF2L1	SMARCA5;SMARCA1	sp|O60264|SMCA5_HUMAN SWI/SNF-related matrix-associated actin-dependent regulator of chromatin subfamily A member 5 OS=Homo sapiens OX=9606 GN=SMARCA5 PE=1 SV=1;sp|P28370|SMCA1_HUMAN Probable global transcription activator SNF2L1 OS=Homo sapiens OX=9606 GN	2	6	6	6	1	0	1	1	1	6	0	1	0	1	1	1	6	0	1	0	1	1	1	6	0	5.4	5.4	5.4	121.9	1052	1052;1054	0	8.9161	By MS/MS		By matching	By matching	By matching	By MS/MS		0.8	0
O60493	O60493	5	3	3	Sorting nexin-3	SNX3	sp|O60493|SNX3_HUMAN Sorting nexin-3 OS=Homo sapiens OX=9606 GN=SNX3 PE=1 SV=3	1	5	3	3	3	0	0	0	3	4	1	1	0	0	0	1	3	0	1	0	0	0	1	3	0	27.8	17.9	17.9	18.762	162	162	0	4.3344	By MS/MS				By matching	By MS/MS	By matching	16.7	0
O60506	O60506	18	18	13	Heterogeneous nuclear ribonucleoprotein Q	SYNCRIP	sp|O60506|HNRPQ_HUMAN Heterogeneous nuclear ribonucleoprotein Q OS=Homo sapiens OX=9606 GN=SYNCRIP PE=1 SV=2	1	18	18	13	11	0	4	5	4	13	6	11	0	4	5	4	13	6	9	0	2	3	2	8	3	30	30	22	69.602	623	623	0	115.58	By MS/MS		By MS/MS	By MS/MS	By MS/MS	By MS/MS	By MS/MS	21.3	0
O60568	O60568	2	2	2	Procollagen-lysine,2-oxoglutarate 5-dioxygenase 3	PLOD3	sp|O60568|PLOD3_HUMAN Procollagen-lysine,2-oxoglutarate 5-dioxygenase 3 OS=Homo sapiens OX=9606 GN=PLOD3 PE=1 SV=1	1	2	2	2	1	0	0	0	1	1	0	1	0	0	0	1	1	0	1	0	0	0	1	1	0	3.1	3.1	3.1	84.784	738	738	0.0012731	2.2558	By MS/MS				By matching	By MS/MS		1.9	0
O60610;Q8IUG5	O60610	3;1	3;1	3;1	Protein diaphanous homolog 1	DIAPH1	sp|O60610|DIAP1_HUMAN Protein diaphanous homolog 1 OS=Homo sapiens OX=9606 GN=DIAPH1 PE=1 SV=2	2	3	3	3	1	0	0	0	0	3	1	1	0	0	0	0	3	1	1	0	0	0	0	3	1	2	2	2	141.35	1272	1272;2567	0	3.6631	By MS/MS					By MS/MS	By matching	0.6	0
O60664	O60664	8	8	8	Perilipin-3	PLIN3	sp|O60664|PLIN3_HUMAN Perilipin-3 OS=Homo sapiens OX=9606 GN=PLIN3 PE=1 SV=3	1	8	8	8	6	0	0	2	7	4	1	6	0	0	2	7	4	1	6	0	0	2	7	4	1	26	26	26	47.074	434	434	0	51.355	By MS/MS			By matching	By MS/MS	By MS/MS	By matching	22.6	0
O60684;O15131	O60684;O15131	6;4	6;4	3;2	Importin subunit alpha-7;Importin subunit alpha-6	KPNA6;KPNA5	sp|O60684|IMA7_HUMAN Importin subunit alpha-7 OS=Homo sapiens OX=9606 GN=KPNA6 PE=1 SV=1;sp|O15131|IMA6_HUMAN Importin subunit alpha-6 OS=Homo sapiens OX=9606 GN=KPNA5 PE=1 SV=2	2	6	6	3	3	0	0	0	1	5	0	3	0	0	0	1	5	0	1	0	0	0	1	3	0	16.4	16.4	8.2	60.029	536	536;536	0	37.239	By MS/MS				By matching	By MS/MS		7.5	0
O60701	O60701	18	18	18	UDP-glucose 6-dehydrogenase	UGDH	sp|O60701|UGDH_HUMAN UDP-glucose 6-dehydrogenase OS=Homo sapiens OX=9606 GN=UGDH PE=1 SV=1	1	18	18	18	14	0	5	3	12	12	4	14	0	5	3	12	12	4	14	0	5	3	12	12	4	44.7	44.7	44.7	55.023	494	494	0	91.968	By MS/MS		By matching	By matching	By MS/MS	By MS/MS	By MS/MS	37.2	0
O60716	O60716	6	6	6	Catenin delta-1	CTNND1	sp|O60716|CTND1_HUMAN Catenin delta-1 OS=Homo sapiens OX=9606 GN=CTNND1 PE=1 SV=1	1	6	6	6	1	0	0	0	2	6	0	1	0	0	0	2	6	0	1	0	0	0	2	6	0	8.8	8.8	8.8	108.17	968	968	0	14.502	By MS/MS				By matching	By MS/MS		1.2	0
O60763	O60763	1	1	1	General vesicular transport factor p115	USO1	sp|O60763|USO1_HUMAN General vesicular transport factor p115 OS=Homo sapiens OX=9606 GN=USO1 PE=1 SV=2	1	1	1	1	0	0	0	0	0	1	0	0	0	0	0	0	1	0	0	0	0	0	0	1	0	0.9	0.9	0.9	107.89	962	962	0.003663	1.8429						By MS/MS		0	0
Q99880;Q99879;Q99877;Q93079;Q5QNW6;P62807;P58876;P57053;O60814;Q96A08	Q99880;Q99879;Q99877;Q93079;Q5QNW6;P62807;P58876;P57053;O60814;Q96A08	7;7;7;7;7;7;7;7;7;4	7;7;7;7;7;7;7;7;7;4	2;2;2;2;2;2;2;2;2;0	Histone H2B type 1-L;Histone H2B type 1-M;Histone H2B type 1-N;Histone H2B type 1-H;Histone H2B type 2-F;Histone H2B type 1-C/E/F/G/I;Histone H2B type 1-D;Histone H2B type F-S;Histone H2B type 1-K;Histone H2B type 1-A	HIST1H2BL;HIST1H2BM;HIST1H2BN;HIST1H2BH;HIST2H2BF;HIST1H2BC;HIST1H2BD;H2BFS;HIST1H2BK;HIST1H2BA	sp|Q99880|H2B1L_HUMAN Histone H2B type 1-L OS=Homo sapiens OX=9606 GN=HIST1H2BL PE=1 SV=3;sp|Q99879|H2B1M_HUMAN Histone H2B type 1-M OS=Homo sapiens OX=9606 GN=HIST1H2BM PE=1 SV=3;sp|Q99877|H2B1N_HUMAN Histone H2B type 1-N OS=Homo sapiens OX=9606 GN=HIST1H	10	7	7	2	7	1	6	6	7	7	5	7	1	6	6	7	7	5	2	0	2	2	2	2	2	43.7	43.7	7.9	13.952	126	126;126;126;126;126;126;126;126;126;127	0	59.844	By MS/MS	By MS/MS	By MS/MS	By MS/MS	By MS/MS	By MS/MS	By MS/MS	43.7	8.7
O60832	O60832	4	4	4	H/ACA ribonucleoprotein complex subunit 4	DKC1	sp|O60832|DKC1_HUMAN H/ACA ribonucleoprotein complex subunit DKC1 OS=Homo sapiens OX=9606 GN=DKC1 PE=1 SV=3	1	4	4	4	1	0	0	0	0	4	0	1	0	0	0	0	4	0	1	0	0	0	0	4	0	9.5	9.5	9.5	57.673	514	514	0	10.427	By MS/MS					By MS/MS		2.5	0
O60841	O60841	9	9	9	Eukaryotic translation initiation factor 5B	EIF5B	sp|O60841|IF2P_HUMAN Eukaryotic translation initiation factor 5B OS=Homo sapiens OX=9606 GN=EIF5B PE=1 SV=4	1	9	9	9	5	0	0	0	3	8	1	5	0	0	0	3	8	1	5	0	0	0	3	8	1	9.7	9.7	9.7	138.83	1220	1220	0	23.902	By MS/MS				By matching	By MS/MS	By matching	6	0
O60869	O60869	4	4	4	Endothelial differentiation-related factor 1	EDF1	sp|O60869|EDF1_HUMAN Endothelial differentiation-related factor 1 OS=Homo sapiens OX=9606 GN=EDF1 PE=1 SV=1	1	4	4	4	4	0	0	1	3	4	1	4	0	0	1	3	4	1	4	0	0	1	3	4	1	30.4	30.4	30.4	16.368	148	148	0	30.074	By MS/MS			By MS/MS	By MS/MS	By MS/MS	By MS/MS	30.4	0
O60884	O60884	5	5	5	DnaJ homolog subfamily A member 2	DNAJA2	sp|O60884|DNJA2_HUMAN DnaJ homolog subfamily A member 2 OS=Homo sapiens OX=9606 GN=DNAJA2 PE=1 SV=1	1	5	5	5	4	0	0	0	1	3	1	4	0	0	0	1	3	1	4	0	0	0	1	3	1	15.8	15.8	15.8	45.745	412	412	0	11.334	By MS/MS				By matching	By MS/MS	By matching	13.3	0
O60888	O60888	1	1	1	Protein CutA	CUTA	sp|O60888|CUTA_HUMAN Protein CutA OS=Homo sapiens OX=9606 GN=CUTA PE=1 SV=2	1	1	1	1	1	0	1	0	1	0	0	1	0	1	0	1	0	0	1	0	1	0	1	0	0	7.8	7.8	7.8	19.116	179	179	0.00065232	2.4959	By MS/MS		By matching		By matching			7.8	0
O60925	O60925	3	3	3	Prefoldin subunit 1	PFDN1	sp|O60925|PFD1_HUMAN Prefoldin subunit 1 OS=Homo sapiens OX=9606 GN=PFDN1 PE=1 SV=2	1	3	3	3	3	0	1	2	2	2	0	3	0	1	2	2	2	0	3	0	1	2	2	2	0	23.8	23.8	23.8	14.21	122	122	0	13.26	By MS/MS		By matching	By matching	By matching	By MS/MS		23.8	0
O75083	O75083	22	22	22	WD repeat-containing protein 1	WDR1	sp|O75083|WDR1_HUMAN WD repeat-containing protein 1 OS=Homo sapiens OX=9606 GN=WDR1 PE=1 SV=4	1	22	22	22	17	1	13	10	14	20	10	17	1	13	10	14	20	10	17	1	13	10	14	20	10	45.7	45.7	45.7	66.193	606	606	0	85.726	By MS/MS	By matching	By MS/MS	By MS/MS	By MS/MS	By MS/MS	By MS/MS	33	1.3
O75116	O75116	4	4	4	Rho-associated protein kinase 2	ROCK2	sp|O75116|ROCK2_HUMAN Rho-associated protein kinase 2 OS=Homo sapiens OX=9606 GN=ROCK2 PE=1 SV=4	1	4	4	4	1	0	0	1	1	3	0	1	0	0	1	1	3	0	1	0	0	1	1	3	0	2.8	2.8	2.8	160.9	1388	1388	0	5.4983	By MS/MS			By matching	By matching	By MS/MS		0.9	0
O75223	O75223	3	3	3	Gamma-glutamylcyclotransferase	GGCT	sp|O75223|GGCT_HUMAN Gamma-glutamylcyclotransferase OS=Homo sapiens OX=9606 GN=GGCT PE=1 SV=1	1	3	3	3	0	0	0	0	1	3	0	0	0	0	0	1	3	0	0	0	0	0	1	3	0	16.5	16.5	16.5	21.007	188	188	0	6.2295					By matching	By MS/MS		0	0
O75340	O75340	4	4	4	Programmed cell death protein 6	PDCD6	sp|O75340|PDCD6_HUMAN Programmed cell death protein 6 OS=Homo sapiens OX=9606 GN=PDCD6 PE=1 SV=1	1	4	4	4	3	0	2	2	3	3	1	3	0	2	2	3	3	1	3	0	2	2	3	3	1	27.7	27.7	27.7	21.868	191	191	0	18.283	By MS/MS		By matching	By matching	By MS/MS	By MS/MS	By matching	23	0
O75347	O75347	6	6	6	Tubulin-specific chaperone A	TBCA	sp|O75347|TBCA_HUMAN Tubulin-specific chaperone A OS=Homo sapiens OX=9606 GN=TBCA PE=1 SV=3	1	6	6	6	3	0	1	1	1	4	0	3	0	1	1	1	4	0	3	0	1	1	1	4	0	42.6	42.6	42.6	12.855	108	108	0	44.545	By MS/MS		By matching	By matching	By MS/MS	By MS/MS		18.5	0
O95670;O75348	O95670;O75348	1;1	1;1	1;1	V-type proton ATPase subunit G 2;V-type proton ATPase subunit G 1	ATP6V1G2;ATP6V1G1	sp|O95670|VATG2_HUMAN V-type proton ATPase subunit G 2 OS=Homo sapiens OX=9606 GN=ATP6V1G2 PE=1 SV=1;sp|O75348|VATG1_HUMAN V-type proton ATPase subunit G 1 OS=Homo sapiens OX=9606 GN=ATP6V1G1 PE=1 SV=3	2	1	1	1	1	0	0	1	1	0	0	1	0	0	1	1	0	0	1	0	0	1	1	0	0	12.7	12.7	12.7	13.604	118	118;118	0	4.9448	By MS/MS			By matching	By matching			12.7	0
O75351	O75351	1	1	1	Vacuolar protein sorting-associated protein 4B	VPS4B	sp|O75351|VPS4B_HUMAN Vacuolar protein sorting-associated protein 4B OS=Homo sapiens OX=9606 GN=VPS4B PE=1 SV=2	1	1	1	1	1	0	0	0	1	0	0	1	0	0	0	1	0	0	1	0	0	0	1	0	0	3.6	3.6	3.6	49.301	444	444	0.0047704	1.6687	By MS/MS				By matching			3.6	0
O75367;Q9P0M6	O75367	14;2	14;2	14;2	Core histone macro-H2A.1	H2AFY	sp|O75367|H2AY_HUMAN Core histone macro-H2A.1 OS=Homo sapiens OX=9606 GN=H2AFY PE=1 SV=4	2	14	14	14	9	0	1	4	5	11	2	9	0	1	4	5	11	2	9	0	1	4	5	11	2	44.9	44.9	44.9	39.617	372	372;372	0	38.729	By MS/MS		By matching	By matching	By matching	By MS/MS	By matching	29.3	0
O75368	O75368	4	4	4	SH3 domain-binding glutamic acid-rich-like protein	SH3BGRL	sp|O75368|SH3L1_HUMAN SH3 domain-binding glutamic acid-rich-like protein OS=Homo sapiens OX=9606 GN=SH3BGRL PE=1 SV=1	1	4	4	4	2	0	0	0	2	4	2	2	0	0	0	2	4	2	2	0	0	0	2	4	2	40.4	40.4	40.4	12.774	114	114	0	15.215	By MS/MS				By MS/MS	By MS/MS	By matching	22.8	0
O75369	O75369	134	134	120	Filamin-B	FLNB	sp|O75369|FLNB_HUMAN Filamin-B OS=Homo sapiens OX=9606 GN=FLNB PE=1 SV=2	1	134	134	120	120	1	89	77	106	113	79	120	1	89	77	106	113	79	108	1	80	69	96	102	71	61.5	61.5	56.8	278.16	2602	2602	0	323.31	By MS/MS	By matching	By MS/MS	By MS/MS	By MS/MS	By MS/MS	By MS/MS	57.3	0.5
O75380	O75380	1	1	1	NADH dehydrogenase [ubiquinone] iron-sulfur protein 6, mitochondrial	NDUFS6	sp|O75380|NDUS6_HUMAN NADH dehydrogenase [ubiquinone] iron-sulfur protein 6, mitochondrial OS=Homo sapiens OX=9606 GN=NDUFS6 PE=1 SV=1	1	1	1	1	1	0	0	0	1	1	0	1	0	0	0	1	1	0	1	0	0	0	1	1	0	12.1	12.1	12.1	13.711	124	124	0.0012634	2.194	By matching				By matching	By MS/MS		12.1	0
O75390	O75390	7	7	7	Citrate synthase, mitochondrial	CS	sp|O75390|CISY_HUMAN Citrate synthase, mitochondrial OS=Homo sapiens OX=9606 GN=CS PE=1 SV=2	1	7	7	7	6	1	3	2	3	4	2	6	1	3	2	3	4	2	6	1	3	2	3	4	2	13.9	13.9	13.9	51.712	466	466	0	12.415	By MS/MS	By matching	By matching	By matching	By MS/MS	By MS/MS	By MS/MS	12.2	1.5
O75396	O75396	5	5	5	Vesicle-trafficking protein SEC22b	SEC22B	sp|O75396|SC22B_HUMAN Vesicle-trafficking protein SEC22b OS=Homo sapiens OX=9606 GN=SEC22B PE=1 SV=4	1	5	5	5	3	0	1	1	4	4	2	3	0	1	1	4	4	2	3	0	1	1	4	4	2	23.7	23.7	23.7	24.593	215	215	0	25.771	By MS/MS		By MS/MS	By matching	By MS/MS	By MS/MS	By matching	15.8	0
O75439	O75439	6	5	5	Mitochondrial-processing peptidase subunit beta	PMPCB	sp|O75439|MPPB_HUMAN Mitochondrial-processing peptidase subunit beta OS=Homo sapiens OX=9606 GN=PMPCB PE=1 SV=2	1	6	5	5	5	0	0	1	4	5	1	4	0	0	1	4	4	0	4	0	0	1	4	4	0	12.5	11	11	54.366	489	489	0	15.893	By MS/MS			By matching	By matching	By MS/MS	By matching	10	0
O75475	O75475	6	5	5	PC4 and SFRS1-interacting protein	PSIP1	sp|O75475|PSIP1_HUMAN PC4 and SFRS1-interacting protein OS=Homo sapiens OX=9606 GN=PSIP1 PE=1 SV=1	1	6	5	5	3	0	3	3	3	5	0	3	0	3	3	3	4	0	3	0	3	3	3	4	0	13.2	11.7	11.7	60.103	530	530	0	37.105	By MS/MS		By matching	By matching	By matching	By MS/MS		6.8	0
O94905;O75477	O94905;O75477	2;2	2;2	2;2	Erlin-2;Erlin-1	ERLIN2;ERLIN1	sp|O94905|ERLN2_HUMAN Erlin-2 OS=Homo sapiens OX=9606 GN=ERLIN2 PE=1 SV=1;sp|O75477|ERLN1_HUMAN Erlin-1 OS=Homo sapiens OX=9606 GN=ERLIN1 PE=1 SV=1	2	2	2	2	2	0	0	0	2	2	0	2	0	0	0	2	2	0	2	0	0	0	2	2	0	5.6	5.6	5.6	37.839	339	339;346	0	4.1877	By MS/MS				By matching	By MS/MS		5.6	0
O75489	O75489	2	2	2	NADH dehydrogenase [ubiquinone] iron-sulfur protein 3, mitochondrial	NDUFS3	sp|O75489|NDUS3_HUMAN NADH dehydrogenase [ubiquinone] iron-sulfur protein 3, mitochondrial OS=Homo sapiens OX=9606 GN=NDUFS3 PE=1 SV=1	1	2	2	2	1	0	1	0	1	2	0	1	0	1	0	1	2	0	1	0	1	0	1	2	0	9.5	9.5	9.5	30.241	264	264	0	8.1045	By MS/MS		By matching		By matching	By MS/MS		5.3	0
O75494;Q8WXF0	O75494;Q8WXF0	6;3	6;3	6;3	Serine/arginine-rich splicing factor 10;Serine/arginine-rich splicing factor 12	SRSF10;SRSF12	sp|O75494|SRS10_HUMAN Serine/arginine-rich splicing factor 10 OS=Homo sapiens OX=9606 GN=SRSF10 PE=1 SV=1;sp|Q8WXF0|SRS12_HUMAN Serine/arginine-rich splicing factor 12 OS=Homo sapiens OX=9606 GN=SRSF12 PE=2 SV=1	2	6	6	6	2	0	1	2	1	4	0	2	0	1	2	1	4	0	2	0	1	2	1	4	0	20.6	20.6	20.6	31.3	262	262;261	0	11.545	By MS/MS		By matching	By matching	By matching	By MS/MS		8.4	0
O75531	O75531	3	3	3	Barrier-to-autointegration factor;Barrier-to-autointegration factor, N-terminally processed	BANF1	sp|O75531|BAF_HUMAN Barrier-to-autointegration factor OS=Homo sapiens OX=9606 GN=BANF1 PE=1 SV=1	1	3	3	3	3	0	2	2	2	2	1	3	0	2	2	2	2	1	3	0	2	2	2	2	1	50.6	50.6	50.6	10.058	89	89	0	12.191	By MS/MS		By matching	By matching	By matching	By matching	By MS/MS	50.6	0
O75533	O75533	14	14	14	Splicing factor 3B subunit 1	SF3B1	sp|O75533|SF3B1_HUMAN Splicing factor 3B subunit 1 OS=Homo sapiens OX=9606 GN=SF3B1 PE=1 SV=3	1	14	14	14	7	0	0	1	2	12	0	7	0	0	1	2	12	0	7	0	0	1	2	12	0	14.1	14.1	14.1	145.83	1304	1304	0	38.294	By MS/MS			By matching	By matching	By MS/MS		6.7	0
O75534	O75534	11	11	11	Cold shock domain-containing protein E1	CSDE1	sp|O75534|CSDE1_HUMAN Cold shock domain-containing protein E1 OS=Homo sapiens OX=9606 GN=CSDE1 PE=1 SV=2	1	11	11	11	3	0	1	2	2	10	0	3	0	1	2	2	10	0	3	0	1	2	2	10	0	16.5	16.5	16.5	88.884	798	798	0	32.01	By MS/MS		By matching	By matching	By matching	By MS/MS		3.6	0
O75607	O75607	2	2	2	Nucleoplasmin-3	NPM3	sp|O75607|NPM3_HUMAN Nucleoplasmin-3 OS=Homo sapiens OX=9606 GN=NPM3 PE=1 SV=3	1	2	2	2	1	0	1	0	1	1	0	1	0	1	0	1	1	0	1	0	1	0	1	1	0	15.2	15.2	15.2	19.343	178	178	0	5.7245	By MS/MS		By matching		By matching	By MS/MS		6.2	0
O75643	O75643	16	16	16	U5 small nuclear ribonucleoprotein 200 kDa helicase	SNRNP200	sp|O75643|U520_HUMAN U5 small nuclear ribonucleoprotein 200 kDa helicase OS=Homo sapiens OX=9606 GN=SNRNP200 PE=1 SV=2	1	16	16	16	9	0	1	5	6	11	1	9	0	1	5	6	11	1	9	0	1	5	6	11	1	7.9	7.9	7.9	244.5	2136	2136	0	39.153	By MS/MS		By matching	By matching	By matching	By MS/MS	By matching	5	0
O75663	O75663	1	1	1	TIP41-like protein	TIPRL	sp|O75663|TIPRL_HUMAN TIP41-like protein OS=Homo sapiens OX=9606 GN=TIPRL PE=1 SV=2	1	1	1	1	1	0	0	1	1	1	0	1	0	0	1	1	1	0	1	0	0	1	1	1	0	6.6	6.6	6.6	31.444	272	272	0.004779	1.6783	By matching			By matching	By matching	By MS/MS		6.6	0
O75694	O75694	7	7	7	Nuclear pore complex protein Nup155	NUP155	sp|O75694|NU155_HUMAN Nuclear pore complex protein Nup155 OS=Homo sapiens OX=9606 GN=NUP155 PE=1 SV=1	1	7	7	7	2	0	0	0	1	5	1	2	0	0	0	1	5	1	2	0	0	0	1	5	1	5	5	5	155.2	1391	1391	0	11.872	By MS/MS				By matching	By MS/MS	By matching	2.1	0
Q9UJS0;O75746	Q9UJS0;O75746	2;2	2;2	2;2	Calcium-binding mitochondrial carrier protein Aralar2;Calcium-binding mitochondrial carrier protein Aralar1	SLC25A13;SLC25A12	sp|Q9UJS0|CMC2_HUMAN Calcium-binding mitochondrial carrier protein Aralar2 OS=Homo sapiens OX=9606 GN=SLC25A13 PE=1 SV=2;sp|O75746|CMC1_HUMAN Calcium-binding mitochondrial carrier protein Aralar1 OS=Homo sapiens OX=9606 GN=SLC25A12 PE=1 SV=2	2	2	2	2	1	0	0	0	0	2	0	1	0	0	0	0	2	0	1	0	0	0	0	2	0	3.3	3.3	3.3	74.175	675	675;678	0	4.4584	By MS/MS					By MS/MS		1.2	0
O75821	O75821	9	9	9	Eukaryotic translation initiation factor 3 subunit G	EIF3G	sp|O75821|EIF3G_HUMAN Eukaryotic translation initiation factor 3 subunit G OS=Homo sapiens OX=9606 GN=EIF3G PE=1 SV=2	1	9	9	9	7	0	1	3	6	6	2	7	0	1	3	6	6	2	7	0	1	3	6	6	2	27.5	27.5	27.5	35.611	320	320	0	58.157	By MS/MS		By matching	By matching	By matching	By MS/MS	By matching	22.2	0
O75822	O75822	10	10	10	Eukaryotic translation initiation factor 3 subunit J	EIF3J	sp|O75822|EIF3J_HUMAN Eukaryotic translation initiation factor 3 subunit J OS=Homo sapiens OX=9606 GN=EIF3J PE=1 SV=2	1	10	10	10	10	1	5	4	4	9	3	10	1	5	4	4	9	3	10	1	5	4	4	9	3	34.1	34.1	34.1	29.062	258	258	0	39.486	By MS/MS	By matching	By matching	By MS/MS	By MS/MS	By MS/MS	By matching	34.1	3.1
O75828	O75828	3	1	1	Carbonyl reductase [NADPH] 3	CBR3	sp|O75828|CBR3_HUMAN Carbonyl reductase [NADPH] 3 OS=Homo sapiens OX=9606 GN=CBR3 PE=1 SV=3	1	3	1	1	3	0	1	1	2	2	0	1	0	1	1	1	1	0	1	0	1	1	1	1	0	13.4	2.9	2.9	30.85	277	277	0.0036697	1.8546	By MS/MS		By matching	By matching	By MS/MS	By MS/MS		13.4	0
O75844	O75844	2	2	2	CAAX prenyl protease 1 homolog	ZMPSTE24	sp|O75844|FACE1_HUMAN CAAX prenyl protease 1 homolog OS=Homo sapiens OX=9606 GN=ZMPSTE24 PE=1 SV=2	1	2	2	2	0	0	0	0	0	2	0	0	0	0	0	0	2	0	0	0	0	0	0	2	0	4	4	4	54.812	475	475	0	3.383						By MS/MS		0	0
O75874;P48735	O75874	7;1	7;1	7;1	Isocitrate dehydrogenase [NADP] cytoplasmic	IDH1	sp|O75874|IDHC_HUMAN Isocitrate dehydrogenase [NADP] cytoplasmic OS=Homo sapiens OX=9606 GN=IDH1 PE=1 SV=2	2	7	7	7	5	0	2	0	4	7	0	5	0	2	0	4	7	0	5	0	2	0	4	7	0	17.1	17.1	17.1	46.659	414	414;452	0	19.994	By MS/MS		By matching		By MS/MS	By MS/MS		12.8	0
O75937	O75937	4	4	4	DnaJ homolog subfamily C member 8	DNAJC8	sp|O75937|DNJC8_HUMAN DnaJ homolog subfamily C member 8 OS=Homo sapiens OX=9606 GN=DNAJC8 PE=1 SV=2	1	4	4	4	3	0	0	1	2	3	0	3	0	0	1	2	3	0	3	0	0	1	2	3	0	25.7	25.7	25.7	29.841	253	253	0	9.2939	By MS/MS			By matching	By matching	By MS/MS		19	0
O75947	O75947	4	4	4	ATP synthase subunit d, mitochondrial	ATP5H	sp|O75947|ATP5H_HUMAN ATP synthase subunit d, mitochondrial OS=Homo sapiens OX=9606 GN=ATP5PD PE=1 SV=3	1	4	4	4	2	0	1	1	2	3	1	2	0	1	1	2	3	1	2	0	1	1	2	3	1	21.7	21.7	21.7	18.491	161	161	0	5.7094	By MS/MS		By matching	By matching	By MS/MS	By MS/MS	By matching	11.2	0
O75964	O75964	2	2	2	ATP synthase subunit g, mitochondrial	ATP5L	sp|O75964|ATP5L_HUMAN ATP synthase subunit g, mitochondrial OS=Homo sapiens OX=9606 GN=ATP5MG PE=1 SV=3	1	2	2	2	1	0	0	0	1	2	1	1	0	0	0	1	2	1	1	0	0	0	1	2	1	25.2	25.2	25.2	11.428	103	103	0	7.0162	By MS/MS				By MS/MS	By MS/MS	By matching	10.7	0
O76003	O76003	8	8	8	Glutaredoxin-3	GLRX3	sp|O76003|GLRX3_HUMAN Glutaredoxin-3 OS=Homo sapiens OX=9606 GN=GLRX3 PE=1 SV=2	1	8	8	8	7	0	0	1	3	6	1	7	0	0	1	3	6	1	7	0	0	1	3	6	1	28.7	28.7	28.7	37.432	335	335	0	11.784	By MS/MS			By matching	By matching	By MS/MS	By matching	26.6	0
O76021	O76021	12	12	12	Ribosomal L1 domain-containing protein 1	RSL1D1	sp|O76021|RL1D1_HUMAN Ribosomal L1 domain-containing protein 1 OS=Homo sapiens OX=9606 GN=RSL1D1 PE=1 SV=3	1	12	12	12	6	0	4	3	2	11	2	6	0	4	3	2	11	2	6	0	4	3	2	11	2	26.1	26.1	26.1	54.972	490	490	0	31.02	By MS/MS		By MS/MS	By matching	By matching	By MS/MS	By matching	14.9	0
O76070;Q16143	O76070	4;1	4;1	4;1	Gamma-synuclein	SNCG	sp|O76070|SYUG_HUMAN Gamma-synuclein OS=Homo sapiens OX=9606 GN=SNCG PE=1 SV=2	2	4	4	4	3	0	0	0	0	1	0	3	0	0	0	0	1	0	3	0	0	0	0	1	0	42.5	42.5	42.5	13.331	127	127;134	0	9.3178	By MS/MS					By MS/MS		35.4	0
O76071	O76071	1	1	1	Probable cytosolic iron-sulfur protein assembly protein CIAO1	CIAO1	sp|O76071|CIAO1_HUMAN Probable cytosolic iron-sulfur protein assembly protein CIAO1 OS=Homo sapiens OX=9606 GN=CIAO1 PE=1 SV=1	1	1	1	1	1	0	0	0	0	1	0	1	0	0	0	0	1	0	1	0	0	0	0	1	0	2.7	2.7	2.7	37.84	339	339	0.002451	1.8755	By matching					By MS/MS		2.7	0
O76094	O76094	5	5	5	Signal recognition particle subunit SRP72	SRP72	sp|O76094|SRP72_HUMAN Signal recognition particle subunit SRP72 OS=Homo sapiens OX=9606 GN=SRP72 PE=1 SV=3	1	5	5	5	2	0	0	0	2	5	0	2	0	0	0	2	5	0	2	0	0	0	2	5	0	7.7	7.7	7.7	74.605	671	671	0	15.854	By MS/MS				By matching	By MS/MS		3.1	0
O94760	O94760	3	3	3	N(G),N(G)-dimethylarginine dimethylaminohydrolase 1	DDAH1	sp|O94760|DDAH1_HUMAN N(G),N(G)-dimethylarginine dimethylaminohydrolase 1 OS=Homo sapiens OX=9606 GN=DDAH1 PE=1 SV=3	1	3	3	3	2	0	0	1	2	1	0	2	0	0	1	2	1	0	2	0	0	1	2	1	0	13	13	13	31.121	285	285	0	5.8926	By MS/MS			By matching	By MS/MS	By MS/MS		9.5	0
O94776	O94776	6	6	6	Metastasis-associated protein MTA2	MTA2	sp|O94776|MTA2_HUMAN Metastasis-associated protein MTA2 OS=Homo sapiens OX=9606 GN=MTA2 PE=1 SV=1	1	6	6	6	2	0	1	0	2	6	0	2	0	1	0	2	6	0	2	0	1	0	2	6	0	10	10	10	75.022	668	668	0	11.725	By MS/MS		By matching		By matching	By MS/MS		3	0
O94805;O96019	O94805;O96019	1;1	1;1	1;1	Actin-like protein 6B;Actin-like protein 6A	ACTL6B;ACTL6A	sp|O94805|ACL6B_HUMAN Actin-like protein 6B OS=Homo sapiens OX=9606 GN=ACTL6B PE=1 SV=1;sp|O96019|ACL6A_HUMAN Actin-like protein 6A OS=Homo sapiens OX=9606 GN=ACTL6A PE=1 SV=1	2	1	1	1	0	0	0	0	0	1	0	0	0	0	0	0	1	0	0	0	0	0	0	1	0	2.6	2.6	2.6	46.877	426	426;429	0	4.1528						By MS/MS		0	0
O94826	O94826	3	3	3	Mitochondrial import receptor subunit TOM70	TOMM70A	sp|O94826|TOM70_HUMAN Mitochondrial import receptor subunit TOM70 OS=Homo sapiens OX=9606 GN=TOMM70 PE=1 SV=1	1	3	3	3	2	0	1	0	2	2	0	2	0	1	0	2	2	0	2	0	1	0	2	2	0	5.3	5.3	5.3	67.454	608	608	0	4.9541	By MS/MS		By matching		By matching	By MS/MS		3.5	0
O94906	O94906	5	5	5	Pre-mRNA-processing factor 6	PRPF6	sp|O94906|PRP6_HUMAN Pre-mRNA-processing factor 6 OS=Homo sapiens OX=9606 GN=PRPF6 PE=1 SV=1	1	5	5	5	3	0	1	0	0	4	0	3	0	1	0	0	4	0	3	0	1	0	0	4	0	5.6	5.6	5.6	106.92	941	941	0	10.968	By MS/MS		By matching			By MS/MS		2.8	0
O94925	O94925	13	13	13	Glutaminase kidney isoform, mitochondrial	GLS	sp|O94925|GLSK_HUMAN Glutaminase kidney isoform, mitochondrial OS=Homo sapiens OX=9606 GN=GLS PE=1 SV=1	1	13	13	13	9	0	2	4	11	10	5	9	0	2	4	11	10	5	9	0	2	4	11	10	5	29.1	29.1	29.1	73.46	669	669	0	160.78	By MS/MS		By matching	By matching	By MS/MS	By MS/MS	By MS/MS	21.7	0
O94973;O95782	O94973;O95782	2;2	2;2	2;2	AP-2 complex subunit alpha-2;AP-2 complex subunit alpha-1	AP2A2;AP2A1	sp|O94973|AP2A2_HUMAN AP-2 complex subunit alpha-2 OS=Homo sapiens OX=9606 GN=AP2A2 PE=1 SV=2;sp|O95782|AP2A1_HUMAN AP-2 complex subunit alpha-1 OS=Homo sapiens OX=9606 GN=AP2A1 PE=1 SV=3	2	2	2	2	0	0	0	0	0	2	0	0	0	0	0	0	2	0	0	0	0	0	0	2	0	2.2	2.2	2.2	103.96	939	939;977	0	5.2071						By MS/MS		0	0
O94979	O94979	11	11	11	Protein transport protein Sec31A	SEC31A	sp|O94979|SC31A_HUMAN Protein transport protein Sec31A OS=Homo sapiens OX=9606 GN=SEC31A PE=1 SV=3	1	11	11	11	4	0	0	0	0	10	0	4	0	0	0	0	10	0	4	0	0	0	0	10	0	9.6	9.6	9.6	133.01	1220	1220	0	20.894	By MS/MS					By MS/MS		3	0
O95070	O95070	1	1	1	Protein YIF1A	YIF1A	sp|O95070|YIF1A_HUMAN Protein YIF1A OS=Homo sapiens OX=9606 GN=YIF1A PE=1 SV=2	1	1	1	1	0	0	1	0	0	1	0	0	0	1	0	0	1	0	0	0	1	0	0	1	0	4.1	4.1	4.1	32.011	293	293	0.0012747	2.2675			By matching			By MS/MS		0	0
O95202	O95202	2	2	2	LETM1 and EF-hand domain-containing protein 1, mitochondrial	LETM1	sp|O95202|LETM1_HUMAN Mitochondrial proton/calcium exchanger protein OS=Homo sapiens OX=9606 GN=LETM1 PE=1 SV=1	1	2	2	2	2	0	0	0	1	1	0	2	0	0	0	1	1	0	2	0	0	0	1	1	0	3.4	3.4	3.4	83.353	739	739	0	5.7533	By MS/MS				By matching	By MS/MS		3.4	0
O95232	O95232	6	6	6	Luc7-like protein 3	LUC7L3	sp|O95232|LC7L3_HUMAN Luc7-like protein 3 OS=Homo sapiens OX=9606 GN=LUC7L3 PE=1 SV=2	1	6	6	6	5	0	1	3	1	5	0	5	0	1	3	1	5	0	5	0	1	3	1	5	0	17.1	17.1	17.1	51.466	432	432	0	42.366	By MS/MS		By matching	By MS/MS	By matching	By MS/MS		14.8	0
O95238	O95238	1	1	1	SAM pointed domain-containing Ets transcription factor	SPDEF	sp|O95238|SPDEF_HUMAN SAM pointed domain-containing Ets transcription factor OS=Homo sapiens OX=9606 GN=SPDEF PE=1 SV=1	1	1	1	1	1	0	0	0	0	1	1	1	0	0	0	0	1	1	1	0	0	0	0	1	1	3	3	3	37.517	335	335	0.0058582	1.5308	By MS/MS					By matching	By matching	3	0
O95292	O95292	7	7	6	Vesicle-associated membrane protein-associated protein B/C	VAPB	sp|O95292|VAPB_HUMAN Vesicle-associated membrane protein-associated protein B/C OS=Homo sapiens OX=9606 GN=VAPB PE=1 SV=3	1	7	7	6	3	0	2	1	3	5	0	3	0	2	1	3	5	0	2	0	2	1	2	5	0	30.5	30.5	25.5	27.228	243	243	0	13.738	By MS/MS		By matching	By matching	By MS/MS	By MS/MS		16	0
O95336	O95336	3	3	3	6-phosphogluconolactonase	PGLS	sp|O95336|6PGL_HUMAN 6-phosphogluconolactonase OS=Homo sapiens OX=9606 GN=PGLS PE=1 SV=2	1	3	3	3	2	0	0	0	0	1	0	2	0	0	0	0	1	0	2	0	0	0	0	1	0	15.1	15.1	15.1	27.547	258	258	0	4.8637	By MS/MS					By MS/MS		9.3	0
O95340	O95340	4	4	4	Bifunctional 3-phosphoadenosine 5-phosphosulfate synthase 2;Sulfate adenylyltransferase;Adenylyl-sulfate kinase	PAPSS2	sp|O95340|PAPS2_HUMAN Bifunctional 3-phosphoadenosine 5-phosphosulfate synthase 2 OS=Homo sapiens OX=9606 GN=PAPSS2 PE=1 SV=2	1	4	4	4	1	0	0	0	1	4	0	1	0	0	0	1	4	0	1	0	0	0	1	4	0	8.1	8.1	8.1	69.5	614	614	0	7.7764	By matching				By matching	By MS/MS		2.1	0
O95347	O95347	7	7	7	Structural maintenance of chromosomes protein 2	SMC2	sp|O95347|SMC2_HUMAN Structural maintenance of chromosomes protein 2 OS=Homo sapiens OX=9606 GN=SMC2 PE=1 SV=2	1	7	7	7	2	0	0	0	1	7	0	2	0	0	0	1	7	0	2	0	0	0	1	7	0	5.8	5.8	5.8	135.65	1197	1197	0	10.541	By MS/MS				By matching	By MS/MS		1.8	0
O95361;Q309B1	O95361	5;2	5;2	5;2	Tripartite motif-containing protein 16	TRIM16	sp|O95361|TRI16_HUMAN Tripartite motif-containing protein 16 OS=Homo sapiens OX=9606 GN=TRIM16 PE=1 SV=3	2	5	5	5	3	0	0	1	3	5	2	3	0	0	1	3	5	2	3	0	0	1	3	5	2	9.9	9.9	9.9	63.954	564	564;348	0	11.799	By MS/MS			By matching	By matching	By MS/MS	By matching	4.8	0
O95372	O95372	2	2	2	Acyl-protein thioesterase 2	LYPLA2	sp|O95372|LYPA2_HUMAN Acyl-protein thioesterase 2 OS=Homo sapiens OX=9606 GN=LYPLA2 PE=1 SV=1	1	2	2	2	1	0	0	0	0	1	0	1	0	0	0	0	1	0	1	0	0	0	0	1	0	14.7	14.7	14.7	24.737	231	231	0	5.3049	By MS/MS					By MS/MS		3.5	0
O95373	O95373	14	14	13	Importin-7	IPO7	sp|O95373|IPO7_HUMAN Importin-7 OS=Homo sapiens OX=9606 GN=IPO7 PE=1 SV=1	1	14	14	13	10	0	2	3	6	12	2	10	0	2	3	6	12	2	9	0	2	3	5	12	2	13.9	13.9	12.9	119.52	1038	1038	0	92.066	By MS/MS		By matching	By matching	By MS/MS	By MS/MS	By MS/MS	9.8	0
O95379	O95379	1	1	1	Tumor necrosis factor alpha-induced protein 8	TNFAIP8	sp|O95379|TFIP8_HUMAN Tumor necrosis factor alpha-induced protein 8 OS=Homo sapiens OX=9606 GN=TNFAIP8 PE=1 SV=1	1	1	1	1	1	0	0	0	0	1	0	1	0	0	0	0	1	0	1	0	0	0	0	1	0	4	4	4	23.003	198	198	0.0074799	1.4063	By matching					By MS/MS		4	0
O95394	O95394	3	3	3	Phosphoacetylglucosamine mutase	PGM3	sp|O95394|AGM1_HUMAN Phosphoacetylglucosamine mutase OS=Homo sapiens OX=9606 GN=PGM3 PE=1 SV=1	1	3	3	3	3	0	0	0	3	2	0	3	0	0	0	3	2	0	3	0	0	0	3	2	0	6.8	6.8	6.8	59.851	542	542	0	6.6356	By MS/MS				By matching	By MS/MS		6.8	0
O95399	O95399	1	1	1	Urotensin-2	UTS2	sp|O95399|UTS2_HUMAN Urotensin-2 OS=Homo sapiens OX=9606 GN=UTS2 PE=1 SV=1	1	1	1	1	1	0	0	1	0	1	1	1	0	0	1	0	1	1	1	0	0	1	0	1	1	6.5	6.5	6.5	14.295	124	124	0.0024525	1.8779	By MS/MS			By matching		By MS/MS	By MS/MS	6.5	0
O95427	O95427	1	1	1	GPI ethanolamine phosphate transferase 1	PIGN	sp|O95427|PIGN_HUMAN GPI ethanolamine phosphate transferase 1 OS=Homo sapiens OX=9606 GN=PIGN PE=1 SV=1	1	1	1	1	1	0	1	1	1	0	0	1	0	1	1	1	0	0	1	0	1	1	1	0	0	1.7	1.7	1.7	105.81	931	931	0.0075101	1.4211	By MS/MS		By matching	By matching	By matching			1.7	0
O95433	O95433	7	7	7	Activator of 90 kDa heat shock protein ATPase homolog 1	AHSA1	sp|O95433|AHSA1_HUMAN Activator of 90 kDa heat shock protein ATPase homolog 1 OS=Homo sapiens OX=9606 GN=AHSA1 PE=1 SV=1	1	7	7	7	4	0	0	1	1	4	1	4	0	0	1	1	4	1	4	0	0	1	1	4	1	24.9	24.9	24.9	38.274	338	338	0	33.465	By MS/MS			By matching	By matching	By MS/MS	By matching	16	0
O95445	O95445	2	2	2	Apolipoprotein M	APOM	sp|O95445|APOM_HUMAN Apolipoprotein M OS=Homo sapiens OX=9606 GN=APOM PE=1 SV=2	1	2	2	2	0	1	0	0	0	2	0	0	1	0	0	0	2	0	0	1	0	0	0	2	0	6.9	6.9	6.9	21.253	188	188	0.0042527	1.8156		By matching				By MS/MS		0	3.2
O95571	O95571	3	3	3	Persulfide dioxygenase ETHE1, mitochondrial	ETHE1	sp|O95571|ETHE1_HUMAN Persulfide dioxygenase ETHE1, mitochondrial OS=Homo sapiens OX=9606 GN=ETHE1 PE=1 SV=2	1	3	3	3	2	0	0	0	1	2	0	2	0	0	0	1	2	0	2	0	0	0	1	2	0	16.9	16.9	16.9	27.873	254	254	0	7.5804	By MS/MS				By matching	By MS/MS		8.7	0
O95573	O95573	1	1	1	Long-chain-fatty-acid--CoA ligase 3	ACSL3	sp|O95573|ACSL3_HUMAN Long-chain-fatty-acid--CoA ligase 3 OS=Homo sapiens OX=9606 GN=ACSL3 PE=1 SV=3	1	1	1	1	0	0	0	0	0	1	0	0	0	0	0	0	1	0	0	0	0	0	0	1	0	2.2	2.2	2.2	80.419	720	720	0.0018507	1.9533						By MS/MS		0	0
O95747;Q9UEW8	O95747	5;1	5;1	5;1	Serine/threonine-protein kinase OSR1	OXSR1	sp|O95747|OXSR1_HUMAN Serine/threonine-protein kinase OSR1 OS=Homo sapiens OX=9606 GN=OXSR1 PE=1 SV=1	2	5	5	5	4	0	1	1	2	4	1	4	0	1	1	2	4	1	4	0	1	1	2	4	1	9.5	9.5	9.5	58.022	527	527;545	0	13.753	By MS/MS		By matching	By matching	By MS/MS	By MS/MS	By matching	8.2	0
O95757	O95757	9	6	6	Heat shock 70 kDa protein 4L	HSPA4L	sp|O95757|HS74L_HUMAN Heat shock 70 kDa protein 4L OS=Homo sapiens OX=9606 GN=HSPA4L PE=1 SV=3	1	9	6	6	6	0	2	2	5	7	0	4	0	0	1	3	4	0	4	0	0	1	3	4	0	11.4	7.3	7.3	94.511	839	839	0	7.9925	By MS/MS		By matching	By matching	By matching	By MS/MS		8	0
O95777	O95777	1	1	1	U6 snRNA-associated Sm-like protein LSm8	LSM8	sp|O95777|LSM8_HUMAN U6 snRNA-associated Sm-like protein LSm8 OS=Homo sapiens OX=9606 GN=LSM8 PE=1 SV=3	1	1	1	1	0	0	0	0	0	1	0	0	0	0	0	0	1	0	0	0	0	0	0	1	0	10.4	10.4	10.4	10.403	96	96	0.00066622	2.6892						By MS/MS		0	0
O95816	O95816	10	10	10	BAG family molecular chaperone regulator 2	BAG2	sp|O95816|BAG2_HUMAN BAG family molecular chaperone regulator 2 OS=Homo sapiens OX=9606 GN=BAG2 PE=1 SV=1	1	10	10	10	6	0	0	0	3	7	1	6	0	0	0	3	7	1	6	0	0	0	3	7	1	44.5	44.5	44.5	23.772	211	211	0	36.532	By MS/MS				By matching	By MS/MS	By matching	32.2	0
O95817	O95817	6	6	6	BAG family molecular chaperone regulator 3	BAG3	sp|O95817|BAG3_HUMAN BAG family molecular chaperone regulator 3 OS=Homo sapiens OX=9606 GN=BAG3 PE=1 SV=3	1	6	6	6	3	0	0	0	1	5	0	3	0	0	0	1	5	0	3	0	0	0	1	5	0	12.2	12.2	12.2	61.594	575	575	0	8.7644	By MS/MS				By matching	By MS/MS		7.3	0
O95831	O95831	6	6	6	Apoptosis-inducing factor 1, mitochondrial	AIFM1	sp|O95831|AIFM1_HUMAN Apoptosis-inducing factor 1, mitochondrial OS=Homo sapiens OX=9606 GN=AIFM1 PE=1 SV=1	1	6	6	6	3	0	0	0	2	5	0	3	0	0	0	2	5	0	3	0	0	0	2	5	0	11.6	11.6	11.6	66.9	613	613	0	23.952	By MS/MS				By matching	By MS/MS		6.4	0
O95833	O95833	5	5	5	Chloride intracellular channel protein 3	CLIC3	sp|O95833|CLIC3_HUMAN Chloride intracellular channel protein 3 OS=Homo sapiens OX=9606 GN=CLIC3 PE=1 SV=2	1	5	5	5	4	0	0	0	2	3	0	4	0	0	0	2	3	0	4	0	0	0	2	3	0	28.8	28.8	28.8	26.648	236	236	0	9.7109	By MS/MS				By matching	By MS/MS		22.9	0
O95861	O95861	3	3	3	3(2),5-bisphosphate nucleotidase 1	BPNT1	sp|O95861|BPNT1_HUMAN 3(2),5-bisphosphate nucleotidase 1 OS=Homo sapiens OX=9606 GN=BPNT1 PE=1 SV=1	1	3	3	3	3	0	0	0	2	2	0	3	0	0	0	2	2	0	3	0	0	0	2	2	0	10.1	10.1	10.1	33.392	308	308	0	5.4231	By MS/MS				By matching	By MS/MS		10.1	0
O96000	O96000	2	2	2	NADH dehydrogenase [ubiquinone] 1 beta subcomplex subunit 10	NDUFB10	sp|O96000|NDUBA_HUMAN NADH dehydrogenase [ubiquinone] 1 beta subcomplex subunit 10 OS=Homo sapiens OX=9606 GN=NDUFB10 PE=1 SV=3	1	2	2	2	1	0	0	1	0	1	0	1	0	0	1	0	1	0	1	0	0	1	0	1	0	12.2	12.2	12.2	20.776	172	172	0.00065274	2.4964	By MS/MS			By matching		By MS/MS		5.8	0
O96005	O96005	1	1	1	Cleft lip and palate transmembrane protein 1	CLPTM1	sp|O96005|CLPT1_HUMAN Cleft lip and palate transmembrane protein 1 OS=Homo sapiens OX=9606 GN=CLPTM1 PE=1 SV=1	1	1	1	1	1	0	0	0	0	1	0	1	0	0	0	0	1	0	1	0	0	0	0	1	0	1.5	1.5	1.5	76.096	669	669	0.0059102	1.6048	By matching					By MS/MS		1.5	0
O96008	O96008	2	2	2	Mitochondrial import receptor subunit TOM40 homolog	TOMM40	sp|O96008|TOM40_HUMAN Mitochondrial import receptor subunit TOM40 homolog OS=Homo sapiens OX=9606 GN=TOMM40 PE=1 SV=1	1	2	2	2	0	0	0	0	0	2	1	0	0	0	0	0	2	1	0	0	0	0	0	2	1	5.5	5.5	5.5	37.893	361	361	0	6.0419						By MS/MS	By MS/MS	0	0
P00167	P00167	2	2	2	Cytochrome b5	CYB5A	sp|P00167|CYB5_HUMAN Cytochrome b5 OS=Homo sapiens OX=9606 GN=CYB5A PE=1 SV=2	1	2	2	2	0	0	0	0	0	2	0	0	0	0	0	0	2	0	0	0	0	0	0	2	0	20.1	20.1	20.1	15.33	134	134	0.00067889	2.9643						By MS/MS		0	0
P00338;Q6ZMR3;P07864	P00338	24;1;1	24;1;1	23;0;0	L-lactate dehydrogenase A chain	LDHA	sp|P00338|LDHA_HUMAN L-lactate dehydrogenase A chain OS=Homo sapiens OX=9606 GN=LDHA PE=1 SV=2	3	24	24	23	22	0	12	10	13	20	11	22	0	12	10	13	20	11	21	0	11	9	12	19	10	78.6	78.6	75	36.688	332	332;332;332	0	190.63	By MS/MS		By MS/MS	By MS/MS	By MS/MS	By MS/MS	By MS/MS	62	0
P00367;P49448	P00367;P49448	7;5	7;5	7;5	Glutamate dehydrogenase 1, mitochondrial;Glutamate dehydrogenase 2, mitochondrial	GLUD1;GLUD2	sp|P00367|DHE3_HUMAN Glutamate dehydrogenase 1, mitochondrial OS=Homo sapiens OX=9606 GN=GLUD1 PE=1 SV=2;sp|P49448|DHE4_HUMAN Glutamate dehydrogenase 2, mitochondrial OS=Homo sapiens OX=9606 GN=GLUD2 PE=1 SV=2	2	7	7	7	3	0	1	1	3	7	0	3	0	1	1	3	7	0	3	0	1	1	3	7	0	14.7	14.7	14.7	61.397	558	558;558	0	28.694	By MS/MS		By matching	By matching	By matching	By MS/MS		6.6	0
P00374;Q86XF0	P00374;Q86XF0	2;1	2;1	2;1	Dihydrofolate reductase;Dihydrofolate reductase, mitochondrial	DHFR;DHFRL1	sp|P00374|DYR_HUMAN Dihydrofolate reductase OS=Homo sapiens OX=9606 GN=DHFR PE=1 SV=2;sp|Q86XF0|DYR2_HUMAN Dihydrofolate reductase 2, mitochondrial OS=Homo sapiens OX=9606 GN=DHFR2 PE=1 SV=1	2	2	2	2	1	0	0	0	1	2	0	1	0	0	0	1	2	0	1	0	0	0	1	2	0	9.1	9.1	9.1	21.452	187	187;187	0	4.4764	By MS/MS				By matching	By MS/MS		5.3	0
P00387	P00387	5	5	5	NADH-cytochrome b5 reductase 3;NADH-cytochrome b5 reductase 3 membrane-bound form;NADH-cytochrome b5 reductase 3 soluble form	CYB5R3	sp|P00387|NB5R3_HUMAN NADH-cytochrome b5 reductase 3 OS=Homo sapiens OX=9606 GN=CYB5R3 PE=1 SV=3	1	5	5	5	4	0	2	2	4	3	1	4	0	2	2	4	3	1	4	0	2	2	4	3	1	15.6	15.6	15.6	34.234	301	301	0	15.952	By MS/MS		By matching	By matching	By MS/MS	By MS/MS	By MS/MS	13.3	0
P00390	P00390	7	7	7	Glutathione reductase, mitochondrial	GSR	sp|P00390|GSHR_HUMAN Glutathione reductase, mitochondrial OS=Homo sapiens OX=9606 GN=GSR PE=1 SV=2	1	7	7	7	7	0	3	4	5	3	0	7	0	3	4	5	3	0	7	0	3	4	5	3	0	18.6	18.6	18.6	56.256	522	522	0	25.02	By MS/MS		By matching	By matching	By MS/MS	By MS/MS		18.6	0
P00403	P00403	1	1	1	Cytochrome c oxidase subunit 2	MT-CO2	sp|P00403|COX2_HUMAN Cytochrome c oxidase subunit 2 OS=Homo sapiens OX=9606 GN=MT-CO2 PE=1 SV=1	1	1	1	1	1	0	1	0	1	1	1	1	0	1	0	1	1	1	1	0	1	0	1	1	1	4.4	4.4	4.4	25.565	227	227	0	3.8724	By MS/MS		By matching		By MS/MS	By MS/MS	By matching	4.4	0
P00441	P00441	6	6	6	Superoxide dismutase [Cu-Zn]	SOD1	sp|P00441|SODC_HUMAN Superoxide dismutase [Cu-Zn] OS=Homo sapiens OX=9606 GN=SOD1 PE=1 SV=2	1	6	6	6	6	0	4	4	5	4	0	6	0	4	4	5	4	0	6	0	4	4	5	4	0	64.9	64.9	64.9	15.936	154	154	0	109.1	By MS/MS		By MS/MS	By MS/MS	By MS/MS	By MS/MS		64.9	0
P00491	P00491	11	11	11	Purine nucleoside phosphorylase	PNP	sp|P00491|PNPH_HUMAN Purine nucleoside phosphorylase OS=Homo sapiens OX=9606 GN=PNP PE=1 SV=2	1	11	11	11	6	0	4	1	5	6	0	6	0	4	1	5	6	0	6	0	4	1	5	6	0	45.3	45.3	45.3	32.118	289	289	0	39.705	By MS/MS		By matching	By matching	By MS/MS	By MS/MS		21.5	0
P00492	P00492	6	6	6	Hypoxanthine-guanine phosphoribosyltransferase	HPRT1	sp|P00492|HPRT_HUMAN Hypoxanthine-guanine phosphoribosyltransferase OS=Homo sapiens OX=9606 GN=HPRT1 PE=1 SV=2	1	6	6	6	5	0	2	1	4	2	0	5	0	2	1	4	2	0	5	0	2	1	4	2	0	33	33	33	24.579	218	218	0	16.91	By MS/MS		By matching	By matching	By MS/MS	By MS/MS		27.5	0
P00505	P00505	7	7	7	Aspartate aminotransferase, mitochondrial	GOT2	sp|P00505|AATM_HUMAN Aspartate aminotransferase, mitochondrial OS=Homo sapiens OX=9606 GN=GOT2 PE=1 SV=3	1	7	7	7	7	0	2	3	6	0	0	7	0	2	3	6	0	0	7	0	2	3	6	0	0	17.2	17.2	17.2	47.517	430	430	0	36.112	By MS/MS		By matching	By matching	By MS/MS			17.2	0
P00533;P04626;Q15303	P00533	4;1;1	4;1;1	4;1;1	Epidermal growth factor receptor	EGFR	sp|P00533|EGFR_HUMAN Epidermal growth factor receptor OS=Homo sapiens OX=9606 GN=EGFR PE=1 SV=2	3	4	4	4	1	0	0	0	0	4	0	1	0	0	0	0	4	0	1	0	0	0	0	4	0	3.4	3.4	3.4	134.28	1210	1210;1255;1308	0	4.3749	By matching					By MS/MS		1	0
P00558;P07205	P00558	24;4	24;4	24;4	Phosphoglycerate kinase 1	PGK1	sp|P00558|PGK1_HUMAN Phosphoglycerate kinase 1 OS=Homo sapiens OX=9606 GN=PGK1 PE=1 SV=3	2	24	24	24	22	1	14	15	18	19	11	22	1	14	15	18	19	11	22	1	14	15	18	19	11	64.5	64.5	64.5	44.614	417	417;417	0	304.14	By MS/MS	By matching	By MS/MS	By MS/MS	By MS/MS	By MS/MS	By MS/MS	57.8	1.9
P00568	P00568	6	6	6	Adenylate kinase isoenzyme 1	AK1	sp|P00568|KAD1_HUMAN Adenylate kinase isoenzyme 1 OS=Homo sapiens OX=9606 GN=AK1 PE=1 SV=3	1	6	6	6	5	0	1	1	2	5	0	5	0	1	1	2	5	0	5	0	1	1	2	5	0	40.7	40.7	40.7	21.635	194	194	0	17.967	By MS/MS		By matching	By matching	By MS/MS	By MS/MS		35.1	0
P01040	P01040	5	5	5	Cystatin-A;Cystatin-A, N-terminally processed	CSTA	sp|P01040|CYTA_HUMAN Cystatin-A OS=Homo sapiens OX=9606 GN=CSTA PE=1 SV=1	1	5	5	5	1	0	5	4	4	0	1	1	0	5	4	4	0	1	1	0	5	4	4	0	1	44.9	44.9	44.9	11.006	98	98	0	10.994	By matching		By MS/MS	By matching	By MS/MS		By matching	23.5	0
P01116;P01112;P01111	P01116;P01112;P01111	2;1;1	2;1;1	2;1;1	GTPase KRas;GTPase KRas, N-terminally processed;GTPase HRas;GTPase HRas, N-terminally processed;GTPase NRas	KRAS;HRAS;NRAS	sp|P01116|RASK_HUMAN GTPase KRas OS=Homo sapiens OX=9606 GN=KRAS PE=1 SV=1;sp|P01112|RASH_HUMAN GTPase HRas OS=Homo sapiens OX=9606 GN=HRAS PE=1 SV=1;sp|P01111|RASN_HUMAN GTPase NRas OS=Homo sapiens OX=9606 GN=NRAS PE=1 SV=1	3	2	2	2	2	0	1	1	2	1	0	2	0	1	1	2	1	0	2	0	1	1	2	1	0	10.6	10.6	10.6	21.656	189	189;189;189	0.0012715	2.2525	By MS/MS		By matching	By matching	By matching	By MS/MS		10.6	0
P01891;P30453;P16190;P30457;P30459;P16189;P30450;P18462;P30512;P10314;P30456;Q09160	P01891;P30453;P16190;P30457;P30459;P16189;P30450;P18462;P30512;P10314;P30456	10;8;8;7;7;7;6;6;6;6;5;1	10;8;8;7;7;7;6;6;6;6;5;1	1;0;0;0;0;0;0;0;0;0;0;0	HLA class I histocompatibility antigen, A-68 alpha chain;HLA class I histocompatibility antigen, A-34 alpha chain;HLA class I histocompatibility antigen, A-33 alpha chain;HLA class I histocompatibility antigen, A-66 alpha chain;HLA class I histocompatibility antigen, A-74 alpha chain;HLA class I histocompatibility antigen, A-31 alpha chain;HLA class I histocompatibility antigen, A-26 alpha chain;…	HLA-A	sp|P01891|1A68_HUMAN HLA class I histocompatibility antigen, A-68 alpha chain OS=Homo sapiens OX=9606 GN=HLA-A PE=1 SV=4;sp|P30453|1A34_HUMAN HLA class I histocompatibility antigen, A-34 alpha chain OS=Homo sapiens OX=9606 GN=HLA-A PE=1 SV=1;sp|P16190|1A33	12	10	10	1	4	0	3	2	4	9	1	4	0	3	2	4	9	1	0	0	0	0	1	1	0	37.5	37.5	3	40.908	365	365;365;365;365;365;365;365;365;365;365;365;365	0	56.999	By MS/MS		By matching	By matching	By MS/MS	By MS/MS	By matching	15.3	0
P68871;P02042	P68871;P02042	3;3	1;1	1;1	Hemoglobin subunit beta;LVV-hemorphin-7;Spinorphin;Hemoglobin subunit delta	HBB;HBD	sp|P68871|HBB_HUMAN Hemoglobin subunit beta OS=Homo sapiens OX=9606 GN=HBB PE=1 SV=2;sp|P02042|HBD_HUMAN Hemoglobin subunit delta OS=Homo sapiens OX=9606 GN=HBD PE=1 SV=2	2	3	1	1	1	0	1	1	1	2	1	1	0	1	1	1	0	1	1	0	1	1	1	0	1	22.4	9.5	9.5	15.998	147	147;147	0.00066489	2.6819	By matching		By MS/MS	By MS/MS	By MS/MS	By matching	By MS/MS	9.5	0
P02545	P02545	48	48	46	Prelamin-A/C;Lamin-A/C	LMNA	sp|P02545|LMNA_HUMAN Prelamin-A/C OS=Homo sapiens OX=9606 GN=LMNA PE=1 SV=1	1	48	48	46	43	0	34	33	33	42	29	43	0	34	33	33	42	29	41	0	34	33	33	40	29	62	62	60.7	74.139	664	664	0	323.31	By MS/MS		By MS/MS	By MS/MS	By MS/MS	By MS/MS	By MS/MS	52.3	0
P02751	P02751	4	4	4	Fibronectin;Anastellin;Ugl-Y1;Ugl-Y2;Ugl-Y3	FN1	sp|P02751|FINC_HUMAN Fibronectin OS=Homo sapiens OX=9606 GN=FN1 PE=1 SV=4	1	4	4	4	1	0	0	0	2	3	0	1	0	0	0	2	3	0	1	0	0	0	2	3	0	1.9	1.9	1.9	262.62	2386	2386	0	7.7337	By matching				By MS/MS	By MS/MS		0.3	0
P02786	P02786	11	11	11	Transferrin receptor protein 1;Transferrin receptor protein 1, serum form	TFRC	sp|P02786|TFR1_HUMAN Transferrin receptor protein 1 OS=Homo sapiens OX=9606 GN=TFRC PE=1 SV=2	1	11	11	11	10	0	4	6	9	1	0	10	0	4	6	9	1	0	10	0	4	6	9	1	0	16.7	16.7	16.7	84.87	760	760	0	55.65	By MS/MS		By MS/MS	By MS/MS	By MS/MS	By MS/MS		15.4	0
P80297;P02795;P13640;CON__P67983;P80294;P04731;Q8N339;P04732	P80297;P02795;P13640;CON__P67983;P80294;P04731;Q8N339;P04732	2;2;2;1;1;1;1;1	2;2;2;1;1;1;1;1	2;2;2;1;1;1;1;1	Metallothionein-1X;Metallothionein-2;Metallothionein-1G;Metallothionein-1H;Metallothionein-1A;Metallothionein-1M;Metallothionein-1E	MT1X;MT2A;MT1G;MT1H;MT1A;MT1M;MT1E	sp|P80297|MT1X_HUMAN Metallothionein-1X OS=Homo sapiens OX=9606 GN=MT1X PE=1 SV=1;sp|P02795|MT2_HUMAN Metallothionein-2 OS=Homo sapiens OX=9606 GN=MT2A PE=1 SV=1;sp|P13640|MT1G_HUMAN Metallothionein-1G OS=Homo sapiens OX=9606 GN=MT1G PE=1 SV=2;;sp|P80294|M	8	2	2	2	1	0	1	0	1	2	2	1	0	1	0	1	2	2	1	0	1	0	1	2	2	32.8	32.8	32.8	6.0683	61	61;61;62;61;61;61;61;61	0	8.2958	By MS/MS		By matching		By MS/MS	By MS/MS	By MS/MS	19.7	0
P04075	P04075	29	29	25	Fructose-bisphosphate aldolase A	ALDOA	sp|P04075|ALDOA_HUMAN Fructose-bisphosphate aldolase A OS=Homo sapiens OX=9606 GN=ALDOA PE=1 SV=2	1	29	29	25	26	0	21	18	21	27	18	26	0	21	18	21	27	18	24	0	21	18	20	23	16	86.8	86.8	75.3	39.42	364	364	0	323.31	By MS/MS		By MS/MS	By MS/MS	By MS/MS	By MS/MS	By MS/MS	79.1	0
P04080	P04080	6	6	6	Cystatin-B	CSTB	sp|P04080|CYTB_HUMAN Cystatin-B OS=Homo sapiens OX=9606 GN=CSTB PE=1 SV=2	1	6	6	6	6	0	4	5	5	3	0	6	0	4	5	5	3	0	6	0	4	5	5	3	0	59.2	59.2	59.2	11.139	98	98	0	16.828	By MS/MS		By MS/MS	By MS/MS	By MS/MS	By MS/MS		59.2	0
P04083	P04083	23	23	23	Annexin A1	ANXA1	sp|P04083|ANXA1_HUMAN Annexin A1 OS=Homo sapiens OX=9606 GN=ANXA1 PE=1 SV=2	1	23	23	23	20	0	10	8	14	17	9	20	0	10	8	14	17	9	20	0	10	8	14	17	9	66.5	66.5	66.5	38.714	346	346	0	297.81	By MS/MS		By MS/MS	By MS/MS	By MS/MS	By MS/MS	By MS/MS	54.9	0
P04150	P04150	1	1	1	Glucocorticoid receptor	NR3C1	sp|P04150|GCR_HUMAN Glucocorticoid receptor OS=Homo sapiens OX=9606 GN=NR3C1 PE=1 SV=1	1	1	1	1	0	0	0	0	0	1	0	0	0	0	0	0	1	0	0	0	0	0	0	1	0	1.4	1.4	1.4	85.658	777	777	0.0018622	2.0194						By MS/MS		0	0
P04181	P04181	2	2	2	Ornithine aminotransferase, mitochondrial;Ornithine aminotransferase, hepatic form;Ornithine aminotransferase, renal form	OAT	sp|P04181|OAT_HUMAN Ornithine aminotransferase, mitochondrial OS=Homo sapiens OX=9606 GN=OAT PE=1 SV=1	1	2	2	2	1	0	0	0	1	1	0	1	0	0	0	1	1	0	1	0	0	0	1	1	0	6.6	6.6	6.6	48.534	439	439	0	4.8719	By MS/MS				By matching	By MS/MS		3.4	0
P04264;CON__P04264	P04264;CON__P04264	37;36	33;32	24;23	Keratin, type II cytoskeletal 1	KRT1	sp|P04264|K2C1_HUMAN Keratin, type II cytoskeletal 1 OS=Homo sapiens OX=9606 GN=KRT1 PE=1 SV=6;	2	37	33	24	29	7	23	23	23	28	19	25	7	19	21	19	24	15	18	6	15	16	15	16	10	47.8	46.4	34.8	66.038	644	644;644	0	253.73	By MS/MS	By MS/MS	By MS/MS	By MS/MS	By MS/MS	By MS/MS	By MS/MS	38.4	9.5
P04350	P04350	20	2	0	Tubulin beta-4A chain	TUBB4A	sp|P04350|TBB4A_HUMAN Tubulin beta-4A chain OS=Homo sapiens OX=9606 GN=TUBB4A PE=1 SV=2	1	20	2	0	18	0	13	11	18	17	13	1	0	0	0	1	1	0	0	0	0	0	0	0	0	65.1	5.9	0	49.585	444	444	0	21.319	By MS/MS		By matching	By matching	By matching	By MS/MS	By matching	63.1	0
P04406;O14556	P04406	17;1	17;1	17;1	Glyceraldehyde-3-phosphate dehydrogenase	GAPDH	sp|P04406|G3P_HUMAN Glyceraldehyde-3-phosphate dehydrogenase OS=Homo sapiens OX=9606 GN=GAPDH PE=1 SV=3	2	17	17	17	14	2	14	15	15	15	12	14	2	14	15	15	15	12	14	2	14	15	15	15	12	67.5	67.5	67.5	36.053	335	335;408	0	323.31	By MS/MS	By matching	By MS/MS	By MS/MS	By MS/MS	By MS/MS	By MS/MS	54.6	4.8
P04424	P04424	1	1	1	Argininosuccinate lyase	ASL	sp|P04424|ARLY_HUMAN Argininosuccinate lyase OS=Homo sapiens OX=9606 GN=ASL PE=1 SV=4	1	1	1	1	0	0	0	0	0	1	0	0	0	0	0	0	1	0	0	0	0	0	0	1	0	2.4	2.4	2.4	51.657	464	464	0	3.7743						By MS/MS		0	0
P04632;Q96L46	P04632	10;3	10;3	10;3	Calpain small subunit 1	CAPNS1	sp|P04632|CPNS1_HUMAN Calpain small subunit 1 OS=Homo sapiens OX=9606 GN=CAPNS1 PE=1 SV=1	2	10	10	10	5	0	1	0	2	9	2	5	0	1	0	2	9	2	5	0	1	0	2	9	2	47.8	47.8	47.8	28.315	268	268;248	0	64.792	By MS/MS		By matching		By MS/MS	By MS/MS	By matching	32.1	0
P04792	P04792	12	12	12	Heat shock protein beta-1	HSPB1	sp|P04792|HSPB1_HUMAN Heat shock protein beta-1 OS=Homo sapiens OX=9606 GN=HSPB1 PE=1 SV=2	1	12	12	12	11	0	9	9	11	12	8	11	0	9	9	11	12	8	11	0	9	9	11	12	8	50.7	50.7	50.7	22.782	205	205	0	82.363	By MS/MS		By MS/MS	By MS/MS	By MS/MS	By MS/MS	By MS/MS	50.7	0
P04818	P04818	3	3	3	Thymidylate synthase	TYMS	sp|P04818|TYSY_HUMAN Thymidylate synthase OS=Homo sapiens OX=9606 GN=TYMS PE=1 SV=3	1	3	3	3	1	0	0	0	1	3	0	1	0	0	0	1	3	0	1	0	0	0	1	3	0	15	15	15	35.716	313	313	0	4.0838	By MS/MS				By matching	By MS/MS		5.1	0
P04843	P04843	17	17	17	Dolichyl-diphosphooligosaccharide--protein glycosyltransferase subunit 1	RPN1	sp|P04843|RPN1_HUMAN Dolichyl-diphosphooligosaccharide--protein glycosyltransferase subunit 1 OS=Homo sapiens OX=9606 GN=RPN1 PE=1 SV=1	1	17	17	17	12	0	3	7	9	15	2	12	0	3	7	9	15	2	12	0	3	7	9	15	2	27.5	27.5	27.5	68.569	607	607	0	65.959	By MS/MS		By MS/MS	By matching	By MS/MS	By MS/MS	By matching	19.8	0
P04844	P04844	4	4	4	Dolichyl-diphosphooligosaccharide--protein glycosyltransferase subunit 2	RPN2	sp|P04844|RPN2_HUMAN Dolichyl-diphosphooligosaccharide--protein glycosyltransferase subunit 2 OS=Homo sapiens OX=9606 GN=RPN2 PE=1 SV=3	1	4	4	4	3	0	2	2	3	4	2	3	0	2	2	3	4	2	3	0	2	2	3	4	2	8.6	8.6	8.6	69.283	631	631	0	17.047	By MS/MS		By matching	By matching	By MS/MS	By MS/MS	By MS/MS	7.3	0
P04899	P04899	10	3	3	Guanine nucleotide-binding protein G(i) subunit alpha-2	GNAI2	sp|P04899|GNAI2_HUMAN Guanine nucleotide-binding protein G(i) subunit alpha-2 OS=Homo sapiens OX=9606 GN=GNAI2 PE=1 SV=3	1	10	3	3	5	0	5	4	5	9	2	1	0	1	0	1	3	0	1	0	1	0	1	3	0	32.1	11	11	40.45	355	355	0	9.5525	By MS/MS		By matching	By matching	By MS/MS	By MS/MS	By matching	17.7	0
Q99878;Q96KK5;Q9BTM1;Q93077;Q7L7L0;P20671;P0C0S8;P04908;Q16777;Q6FI13	Q99878;Q96KK5;Q9BTM1;Q93077;Q7L7L0;P20671;P0C0S8;P04908;Q16777;Q6FI13	5;5;5;5;5;5;5;5;4;4	1;1;1;1;1;1;1;1;1;1	1;1;1;1;1;1;1;1;1;1	Histone H2A type 1-J;Histone H2A type 1-H;Histone H2A.J;Histone H2A type 1-C;Histone H2A type 3;Histone H2A type 1-D;Histone H2A type 1;Histone H2A type 1-B/E;Histone H2A type 2-C;Histone H2A type 2-A	HIST1H2AJ;HIST1H2AH;H2AFJ;HIST1H2AC;HIST3H2A;HIST1H2AD;HIST1H2AG;HIST1H2AB;HIST2H2AC;HIST2H2AA3	sp|Q99878|H2A1J_HUMAN Histone H2A type 1-J OS=Homo sapiens OX=9606 GN=HIST1H2AJ PE=1 SV=3;sp|Q96KK5|H2A1H_HUMAN Histone H2A type 1-H OS=Homo sapiens OX=9606 GN=HIST1H2AH PE=1 SV=3;sp|Q9BTM1|H2AJ_HUMAN Histone H2A.J OS=Homo sapiens OX=9606 GN=H2AFJ PE=1 SV=	10	5	1	1	4	1	4	4	4	4	3	1	1	1	1	1	1	1	1	1	1	1	1	1	1	55.5	14.8	14.8	13.936	128	128;128;129;130;130;130;130;130;129;130	0	34.962	By MS/MS	By MS/MS	By MS/MS	By MS/MS	By MS/MS	By MS/MS	By MS/MS	32.8	14.8
P05023;P13637;P50993;Q13733;P20648;P54707	P05023	21;8;8;3;2;2	21;8;8;3;2;2	21;8;8;3;2;2	Sodium/potassium-transporting ATPase subunit alpha-1	ATP1A1	sp|P05023|AT1A1_HUMAN Sodium/potassium-transporting ATPase subunit alpha-1 OS=Homo sapiens OX=9606 GN=ATP1A1 PE=1 SV=1	6	21	21	21	15	0	9	7	11	17	2	15	0	9	7	11	17	2	15	0	9	7	11	17	2	23.9	23.9	23.9	112.89	1023	1023;1013;1020;1029;1035;1039	0	99.589	By MS/MS		By matching	By MS/MS	By MS/MS	By MS/MS	By matching	17.7	0
P05026	P05026	2	2	2	Sodium/potassium-transporting ATPase subunit beta-1	ATP1B1	sp|P05026|AT1B1_HUMAN Sodium/potassium-transporting ATPase subunit beta-1 OS=Homo sapiens OX=9606 GN=ATP1B1 PE=1 SV=1	1	2	2	2	1	0	0	1	1	1	0	1	0	0	1	1	1	0	1	0	0	1	1	1	0	6.6	6.6	6.6	35.061	303	303	0.0085763	1.3823	By MS/MS			By matching	By matching	By MS/MS		4.3	0
P05114	P05114	6	6	6	Non-histone chromosomal protein HMG-14	HMGN1	sp|P05114|HMGN1_HUMAN Non-histone chromosomal protein HMG-14 OS=Homo sapiens OX=9606 GN=HMGN1 PE=1 SV=3	1	6	6	6	0	0	1	0	0	6	0	0	0	1	0	0	6	0	0	0	1	0	0	6	0	50	50	50	10.659	100	100	0	22.587			By matching			By MS/MS		0	0
P05141;Q9H0C2	P05141	13;3	4;0	4;0	ADP/ATP translocase 2;ADP/ATP translocase 2, N-terminally processed	SLC25A5	sp|P05141|ADT2_HUMAN ADP/ATP translocase 2 OS=Homo sapiens OX=9606 GN=SLC25A5 PE=1 SV=7	2	13	4	4	10	1	7	6	9	13	7	4	0	2	2	3	4	2	4	0	2	2	3	4	2	37.9	14.4	14.4	32.852	298	298;315	0	9.2557	By MS/MS	By matching	By matching	By matching	By MS/MS	By MS/MS	By MS/MS	32.9	3.4
P05161	P05161	6	6	6	Ubiquitin-like protein ISG15	ISG15	sp|P05161|ISG15_HUMAN Ubiquitin-like protein ISG15 OS=Homo sapiens OX=9606 GN=ISG15 PE=1 SV=5	1	6	6	6	5	0	1	1	5	4	2	5	0	1	1	5	4	2	5	0	1	1	5	4	2	41.2	41.2	41.2	17.887	165	165	0	123.35	By MS/MS		By matching	By matching	By MS/MS	By MS/MS	By MS/MS	37	0
P05198	P05198	10	10	10	Eukaryotic translation initiation factor 2 subunit 1	EIF2S1	sp|P05198|IF2A_HUMAN Eukaryotic translation initiation factor 2 subunit 1 OS=Homo sapiens OX=9606 GN=EIF2S1 PE=1 SV=3	1	10	10	10	5	1	3	1	3	8	1	5	1	3	1	3	8	1	5	1	3	1	3	8	1	31.1	31.1	31.1	36.112	315	315	0	31.565	By MS/MS	By matching	By matching	By matching	By MS/MS	By MS/MS	By matching	17.1	2.5
P05204	P05204	3	1	1	Non-histone chromosomal protein HMG-17	HMGN2	sp|P05204|HMGN2_HUMAN Non-histone chromosomal protein HMG-17 OS=Homo sapiens OX=9606 GN=HMGN2 PE=1 SV=3	1	3	1	1	2	0	2	2	2	2	1	1	0	1	1	1	1	0	1	0	1	1	1	1	0	16.7	12.2	12.2	9.3926	90	90	0.0012539	2.1397	By matching		By MS/MS	By matching	By matching	By MS/MS	By matching	16.7	0
P05386	P05386	2	2	2	60S acidic ribosomal protein P1	RPLP1	sp|P05386|RLA1_HUMAN 60S acidic ribosomal protein P1 OS=Homo sapiens OX=9606 GN=RPLP1 PE=1 SV=1	1	2	2	2	2	0	1	1	1	0	0	2	0	1	1	1	0	0	2	0	1	1	1	0	0	60.5	60.5	60.5	11.514	114	114	0	59.454	By MS/MS		By matching	By matching	By matching			60.5	0
P05387	P05387	7	7	7	60S acidic ribosomal protein P2	RPLP2	sp|P05387|RLA2_HUMAN 60S acidic ribosomal protein P2 OS=Homo sapiens OX=9606 GN=RPLP2 PE=1 SV=1	1	7	7	7	7	0	6	5	5	6	2	7	0	6	5	5	6	2	7	0	6	5	5	6	2	78.3	78.3	78.3	11.665	115	115	0	95.79	By MS/MS		By MS/MS	By MS/MS	By MS/MS	By MS/MS	By MS/MS	78.3	0
P05388;Q8NHW5	P05388;Q8NHW5	11;7	11;7	11;7	60S acidic ribosomal protein P0;60S acidic ribosomal protein P0-like	RPLP0;RPLP0P6	sp|P05388|RLA0_HUMAN 60S acidic ribosomal protein P0 OS=Homo sapiens OX=9606 GN=RPLP0 PE=1 SV=1;sp|Q8NHW5|RLA0L_HUMAN 60S acidic ribosomal protein P0-like OS=Homo sapiens OX=9606 GN=RPLP0P6 PE=5 SV=1	2	11	11	11	11	0	8	8	10	8	5	11	0	8	8	10	8	5	11	0	8	8	10	8	5	53.6	53.6	53.6	34.273	317	317;317	0	141.54	By MS/MS		By MS/MS	By MS/MS	By MS/MS	By MS/MS	By MS/MS	53.6	0
P05455	P05455	11	11	11	Lupus La protein	SSB	sp|P05455|LA_HUMAN Lupus La protein OS=Homo sapiens OX=9606 GN=SSB PE=1 SV=2	1	11	11	11	7	0	6	6	7	7	3	7	0	6	6	7	7	3	7	0	6	6	7	7	3	28.4	28.4	28.4	46.836	408	408	0	42.469	By MS/MS		By MS/MS	By matching	By MS/MS	By MS/MS	By MS/MS	19.9	0
P05556	P05556	14	14	14	Integrin beta-1	ITGB1	sp|P05556|ITB1_HUMAN Integrin beta-1 OS=Homo sapiens OX=9606 GN=ITGB1 PE=1 SV=2	1	14	14	14	10	0	6	4	9	13	5	10	0	6	4	9	13	5	10	0	6	4	9	13	5	20.4	20.4	20.4	88.414	798	798	0	83.201	By MS/MS		By MS/MS	By MS/MS	By MS/MS	By MS/MS	By MS/MS	15.3	0
P05783;CON__H-INV:HIT000015463;CON__Q92764;CON__Q497I4;Q92764	P05783	28;3;2;2;2	27;3;1;1;1	18;2;1;1;1	Keratin, type I cytoskeletal 18	KRT18	sp|P05783|K1C18_HUMAN Keratin, type I cytoskeletal 18 OS=Homo sapiens OX=9606 GN=KRT18 PE=1 SV=2	5	28	27	18	26	3	19	21	23	21	15	25	2	18	20	22	20	14	17	2	13	14	14	14	10	64	62.3	47.4	48.057	430	430;295;425;455;455	0	323.31	By MS/MS	By matching	By MS/MS	By MS/MS	By MS/MS	By MS/MS	By MS/MS	54.9	5.1
P05976;P08590	P05976;P08590	1;1	1;1	1;1	Myosin light chain 1/3, skeletal muscle isoform;Myosin light chain 3	MYL1;MYL3	sp|P05976|MYL1_HUMAN Myosin light chain 1/3, skeletal muscle isoform OS=Homo sapiens OX=9606 GN=MYL1 PE=2 SV=3;sp|P08590|MYL3_HUMAN Myosin light chain 3 OS=Homo sapiens OX=9606 GN=MYL3 PE=1 SV=3	2	1	1	1	1	0	0	1	0	1	1	1	0	0	1	0	1	1	1	0	0	1	0	1	1	6.2	6.2	6.2	21.145	194	194;195	0	4.7399	By MS/MS			By MS/MS		By MS/MS	By MS/MS	6.2	0
P06132	P06132	3	3	3	Uroporphyrinogen decarboxylase	UROD	sp|P06132|DCUP_HUMAN Uroporphyrinogen decarboxylase OS=Homo sapiens OX=9606 GN=UROD PE=1 SV=2	1	3	3	3	1	0	0	0	0	3	0	1	0	0	0	0	3	0	1	0	0	0	0	3	0	11.2	11.2	11.2	40.786	367	367	0	23.079	By MS/MS					By MS/MS		2.7	0
P06396;CON__Q3SX14	P06396;CON__Q3SX14	11;10	11;10	11;10	Gelsolin	GSN	sp|P06396|GELS_HUMAN Gelsolin OS=Homo sapiens OX=9606 GN=GSN PE=1 SV=1;	2	11	11	11	8	0	2	1	7	9	1	8	0	2	1	7	9	1	8	0	2	1	7	9	1	15	15	15	85.696	782	782;781	0	27.799	By MS/MS		By matching	By matching	By MS/MS	By MS/MS	By matching	11.6	0
P06454	P06454	3	3	3	Prothymosin alpha;Prothymosin alpha, N-terminally processed;Thymosin alpha-1	PTMA	sp|P06454|PTMA_HUMAN Prothymosin alpha OS=Homo sapiens OX=9606 GN=PTMA PE=1 SV=2	1	3	3	3	2	0	2	2	2	3	2	2	0	2	2	2	3	2	2	0	2	2	2	3	2	36	36	36	12.203	111	111	0	52.293	By MS/MS		By MS/MS	By MS/MS	By MS/MS	By MS/MS	By MS/MS	22.5	0
P06493;P24941;Q00526;Q00535;Q00534;P50750;Q96Q40;O94921;Q07002;Q00536;Q00537;Q9NYV4;Q14004	P06493	7;2;2;1;1;1;1;1;1;1;1;1;1	7;2;2;1;1;1;1;1;1;1;1;1;1	6;1;1;0;0;0;0;0;0;0;0;0;0	Cyclin-dependent kinase 1	CDK1	sp|P06493|CDK1_HUMAN Cyclin-dependent kinase 1 OS=Homo sapiens OX=9606 GN=CDK1 PE=1 SV=3	13	7	7	6	4	0	2	1	1	5	2	4	0	2	1	1	5	2	3	0	1	0	1	4	1	26.3	26.3	23.6	34.095	297	297;298;305;292;326;372;435;469;474;496;523;1490;1512	0	23.245	By MS/MS		By matching	By matching	By matching	By MS/MS	By MS/MS	15.2	0
P06576	P06576	16	16	16	ATP synthase subunit beta, mitochondrial	ATP5B	sp|P06576|ATPB_HUMAN ATP synthase subunit beta, mitochondrial OS=Homo sapiens OX=9606 GN=ATP5F1B PE=1 SV=3	1	16	16	16	12	0	8	8	12	14	10	12	0	8	8	12	14	10	12	0	8	8	12	14	10	42.5	42.5	42.5	56.559	529	529	0	149.05	By MS/MS		By MS/MS	By MS/MS	By MS/MS	By MS/MS	By MS/MS	36.7	0
P06702	P06702	1	1	1	Protein S100-A9	S100A9	sp|P06702|S10A9_HUMAN Protein S100-A9 OS=Homo sapiens OX=9606 GN=S100A9 PE=1 SV=1	1	1	1	1	1	0	1	1	1	0	0	1	0	1	1	1	0	0	1	0	1	1	1	0	0	11.4	11.4	11.4	13.242	114	114	0.0012682	2.2226	By MS/MS		By MS/MS	By MS/MS	By MS/MS			11.4	0
P06703	P06703	7	7	7	Protein S100-A6	S100A6	sp|P06703|S10A6_HUMAN Protein S100-A6 OS=Homo sapiens OX=9606 GN=S100A6 PE=1 SV=1	1	7	7	7	6	0	3	2	3	6	3	6	0	3	2	3	6	3	6	0	3	2	3	6	3	83.3	83.3	83.3	10.18	90	90	0	51.441	By MS/MS		By MS/MS	By MS/MS	By MS/MS	By MS/MS	By MS/MS	78.9	0
P06730	P06730	4	4	4	Eukaryotic translation initiation factor 4E	EIF4E	sp|P06730|IF4E_HUMAN Eukaryotic translation initiation factor 4E OS=Homo sapiens OX=9606 GN=EIF4E PE=1 SV=2	1	4	4	4	3	0	1	1	2	4	0	3	0	1	1	2	4	0	3	0	1	1	2	4	0	22.1	22.1	22.1	25.097	217	217	0	16.423	By MS/MS		By matching	By matching	By MS/MS	By MS/MS		17.1	0
P06733;P09104	P06733	27;4	27;4	23;0	Alpha-enolase	ENO1	sp|P06733|ENOA_HUMAN Alpha-enolase OS=Homo sapiens OX=9606 GN=ENO1 PE=1 SV=2	2	27	27	23	26	3	21	20	25	23	17	26	3	21	20	25	23	17	22	3	18	17	22	19	14	71.2	71.2	58.5	47.168	434	434;434	0	323.31	By MS/MS	By matching	By MS/MS	By MS/MS	By MS/MS	By MS/MS	By MS/MS	69.6	5.1
P06737;P11217;P11216	P06737	9;2;2	9;2;2	9;2;2	Glycogen phosphorylase, liver form	PYGL	sp|P06737|PYGL_HUMAN Glycogen phosphorylase, liver form OS=Homo sapiens OX=9606 GN=PYGL PE=1 SV=4	3	9	9	9	4	0	0	0	1	7	0	4	0	0	0	1	7	0	4	0	0	0	1	7	0	10.3	10.3	10.3	97.147	847	847;842;843	0	12.046	By MS/MS				By matching	By MS/MS		5.1	0
P06744;CON__Q3ZBD7;Q8N196	P06744	23;5;1	23;5;1	23;5;1	Glucose-6-phosphate isomerase	GPI	sp|P06744|G6PI_HUMAN Glucose-6-phosphate isomerase OS=Homo sapiens OX=9606 GN=GPI PE=1 SV=4	3	23	23	23	20	0	11	13	16	18	10	20	0	11	13	16	18	10	20	0	11	13	16	18	10	54.3	54.3	54.3	63.146	558	558;557;739	0	323.31	By MS/MS		By MS/MS	By MS/MS	By MS/MS	By MS/MS	By MS/MS	49.1	0
P06748	P06748	9	9	9	Nucleophosmin	NPM1	sp|P06748|NPM_HUMAN Nucleophosmin OS=Homo sapiens OX=9606 GN=NPM1 PE=1 SV=2	1	9	9	9	5	1	3	3	2	8	5	5	1	3	3	2	8	5	5	1	3	3	2	8	5	34	34	34	32.575	294	294	0	122.07	By MS/MS	By matching	By MS/MS	By MS/MS	By MS/MS	By MS/MS	By MS/MS	17	3.1
P06753	P06753	14	4	4	Tropomyosin alpha-3 chain	TPM3	sp|P06753|TPM3_HUMAN Tropomyosin alpha-3 chain OS=Homo sapiens OX=9606 GN=TPM3 PE=1 SV=2	1	14	4	4	9	0	8	5	6	13	8	4	0	3	2	3	3	4	4	0	3	2	3	3	4	29.8	11.6	11.6	32.95	285	285	0	28.381	By MS/MS		By MS/MS	By MS/MS	By MS/MS	By MS/MS	By MS/MS	23.9	0
P06756	P06756	2	2	2	Integrin alpha-V;Integrin alpha-V heavy chain;Integrin alpha-V light chain	ITGAV	sp|P06756|ITAV_HUMAN Integrin alpha-V OS=Homo sapiens OX=9606 GN=ITGAV PE=1 SV=2	1	2	2	2	1	0	0	0	2	0	0	1	0	0	0	2	0	0	1	0	0	0	2	0	0	1.8	1.8	1.8	116.04	1048	1048	0	4.5391	By matching				By MS/MS			0.9	0
Q16778;P33778;P23527;P06899;Q8N257;Q6DRA6;Q6DN03	Q16778;P33778;P23527;P06899;Q8N257	7;7;7;7;6;2;2	2;2;2;2;2;2;2	2;2;2;2;2;2;2	Histone H2B type 2-E;Histone H2B type 1-B;Histone H2B type 1-O;Histone H2B type 1-J;Histone H2B type 3-B	HIST2H2BE;HIST1H2BB;HIST1H2BO;HIST1H2BJ;HIST3H2BB	sp|Q16778|H2B2E_HUMAN Histone H2B type 2-E OS=Homo sapiens OX=9606 GN=HIST2H2BE PE=1 SV=3;sp|P33778|H2B1B_HUMAN Histone H2B type 1-B OS=Homo sapiens OX=9606 GN=HIST1H2BB PE=1 SV=2;sp|P23527|H2B1O_HUMAN Histone H2B type 1-O OS=Homo sapiens OX=9606 GN=HIST1H	7	7	2	2	7	1	6	6	7	7	5	2	0	2	2	2	2	2	2	0	2	2	2	2	2	43.7	7.9	7.9	13.92	126	126;126;126;126;126;164;193	0	4.866	By MS/MS	By matching	By MS/MS	By MS/MS	By MS/MS	By MS/MS	By MS/MS	43.7	8.7
P07099	P07099	6	6	6	Epoxide hydrolase 1	EPHX1	sp|P07099|HYEP_HUMAN Epoxide hydrolase 1 OS=Homo sapiens OX=9606 GN=EPHX1 PE=1 SV=1	1	6	6	6	1	0	1	0	2	6	0	1	0	1	0	2	6	0	1	0	1	0	2	6	0	12.5	12.5	12.5	52.948	455	455	0	16.253	By MS/MS		By matching		By MS/MS	By MS/MS		3.1	0
P07108	P07108	4	4	4	Acyl-CoA-binding protein	DBI	sp|P07108|ACBP_HUMAN Acyl-CoA-binding protein OS=Homo sapiens OX=9606 GN=DBI PE=1 SV=2	1	4	4	4	2	0	1	1	2	3	1	2	0	1	1	2	3	1	2	0	1	1	2	3	1	63.2	63.2	63.2	10.044	87	87	0	7.8693	By MS/MS		By matching	By matching	By MS/MS	By MS/MS	By matching	35.6	0
P07195	P07195	20	19	19	L-lactate dehydrogenase B chain	LDHB	sp|P07195|LDHB_HUMAN L-lactate dehydrogenase B chain OS=Homo sapiens OX=9606 GN=LDHB PE=1 SV=2	1	20	19	19	19	1	13	11	15	17	11	18	1	12	10	14	16	10	18	1	12	10	14	16	10	54.8	51.2	51.2	36.638	334	334	0	257.24	By MS/MS	By matching	By MS/MS	By MS/MS	By MS/MS	By MS/MS	By MS/MS	53.3	2.7
P07203	P07203	2	2	2	Glutathione peroxidase 1	GPX1	sp|P07203|GPX1_HUMAN Glutathione peroxidase 1 OS=Homo sapiens OX=9606 GN=GPX1 PE=1 SV=4	1	2	2	2	1	0	1	0	1	2	0	1	0	1	0	1	2	0	1	0	1	0	1	2	0	8.9	8.9	8.9	22.088	203	203	0	3.718	By MS/MS		By matching		By matching	By MS/MS		4.4	0
P07237	P07237	27	27	27	Protein disulfide-isomerase	P4HB	sp|P07237|PDIA1_HUMAN Protein disulfide-isomerase OS=Homo sapiens OX=9606 GN=P4HB PE=1 SV=3	1	27	27	27	20	0	18	17	16	19	13	20	0	18	17	16	19	13	20	0	18	17	16	19	13	58.3	58.3	58.3	57.116	508	508	0	141.98	By MS/MS		By MS/MS	By MS/MS	By MS/MS	By MS/MS	By MS/MS	45.5	0
P07339	P07339	7	7	7	Cathepsin D;Cathepsin D light chain;Cathepsin D heavy chain	CTSD	sp|P07339|CATD_HUMAN Cathepsin D OS=Homo sapiens OX=9606 GN=CTSD PE=1 SV=1	1	7	7	7	2	0	1	0	2	7	0	2	0	1	0	2	7	0	2	0	1	0	2	7	0	13.6	13.6	13.6	44.552	412	412	0	6.3151	By matching		By matching		By MS/MS	By MS/MS		2.7	0
P07355;A6NMY6	P07355;A6NMY6	30;21	30;21	30;21	Annexin A2;Putative annexin A2-like protein	ANXA2;ANXA2P2	sp|P07355|ANXA2_HUMAN Annexin A2 OS=Homo sapiens OX=9606 GN=ANXA2 PE=1 SV=2;sp|A6NMY6|AXA2L_HUMAN Putative annexin A2-like protein OS=Homo sapiens OX=9606 GN=ANXA2P2 PE=5 SV=2	2	30	30	30	25	3	20	18	20	24	20	25	3	20	18	20	24	20	25	3	20	18	20	24	20	76.1	76.1	76.1	38.604	339	339;339	0	323.31	By MS/MS	By matching	By MS/MS	By MS/MS	By MS/MS	By MS/MS	By MS/MS	72.3	6.8
P07384	P07384	4	4	4	Calpain-1 catalytic subunit	CAPN1	sp|P07384|CAN1_HUMAN Calpain-1 catalytic subunit OS=Homo sapiens OX=9606 GN=CAPN1 PE=1 SV=1	1	4	4	4	1	0	1	0	2	3	0	1	0	1	0	2	3	0	1	0	1	0	2	3	0	6.2	6.2	6.2	81.889	714	714	0	10.794	By MS/MS		By matching		By MS/MS	By MS/MS		2.5	0
P07437;A6NNZ2;Q9H4B7	P07437	24;7;4	5;0;0	4;0;0	Tubulin beta chain	TUBB	sp|P07437|TBB5_HUMAN Tubulin beta chain OS=Homo sapiens OX=9606 GN=TUBB PE=1 SV=2	3	24	5	4	23	0	17	14	21	20	17	5	0	3	4	5	4	3	4	0	2	3	4	3	2	71.6	19.4	16	49.67	444	444;444;451	0	101.88	By MS/MS		By MS/MS	By MS/MS	By MS/MS	By MS/MS	By MS/MS	71.4	0
P07602	P07602	5	5	5	Prosaposin;Saposin-A;Saposin-B-Val;Saposin-B;Saposin-C;Saposin-D	PSAP	sp|P07602|SAP_HUMAN Prosaposin OS=Homo sapiens OX=9606 GN=PSAP PE=1 SV=2	1	5	5	5	2	0	0	0	2	5	0	2	0	0	0	2	5	0	2	0	0	0	2	5	0	9	9	9	58.112	524	524	0	5.5508	By MS/MS				By matching	By MS/MS		3.4	0
P07737;CON__P02584	P07737	10;3	10;3	10;3	Profilin-1	PFN1	sp|P07737|PROF1_HUMAN Profilin-1 OS=Homo sapiens OX=9606 GN=PFN1 PE=1 SV=2	2	10	10	10	10	0	10	10	10	9	9	10	0	10	10	10	9	9	10	0	10	10	10	9	9	71.4	71.4	71.4	15.054	140	140;140	0	144.57	By MS/MS		By MS/MS	By MS/MS	By MS/MS	By MS/MS	By MS/MS	71.4	0
P07741	P07741	4	4	4	Adenine phosphoribosyltransferase	APRT	sp|P07741|APT_HUMAN Adenine phosphoribosyltransferase OS=Homo sapiens OX=9606 GN=APRT PE=1 SV=2	1	4	4	4	2	0	0	0	1	3	0	2	0	0	0	1	3	0	2	0	0	0	1	3	0	23.3	23.3	23.3	19.608	180	180	0	12.176	By MS/MS				By matching	By MS/MS		13.3	0
P07814	P07814	33	33	33	Bifunctional glutamate/proline--tRNA ligase;Glutamate--tRNA ligase;Proline--tRNA ligase	EPRS	sp|P07814|SYEP_HUMAN Bifunctional glutamate/proline--tRNA ligase OS=Homo sapiens OX=9606 GN=EPRS PE=1 SV=5	1	33	33	33	16	0	5	4	10	29	6	16	0	5	4	10	29	6	16	0	5	4	10	29	6	24.9	24.9	24.9	170.59	1512	1512	0	161.35	By MS/MS		By matching	By MS/MS	By MS/MS	By MS/MS	By matching	12.5	0
P07900;Q58FG0;Q14568;Q58FF6	P07900	39;6;6;6	24;2;2;0	24;2;2;0	Heat shock protein HSP 90-alpha	HSP90AA1	sp|P07900|HS90A_HUMAN Heat shock protein HSP 90-alpha OS=Homo sapiens OX=9606 GN=HSP90AA1 PE=1 SV=5	4	39	24	24	27	1	19	21	22	35	21	16	0	11	13	14	20	12	16	0	11	13	14	20	12	48.1	30.2	30.2	84.659	732	732;334;343;505	0	170.04	By MS/MS	By matching	By MS/MS	By MS/MS	By MS/MS	By MS/MS	By MS/MS	36.3	0.8
P07910;Q86SE5	P07910	13;2	13;2	7;2	Heterogeneous nuclear ribonucleoproteins C1/C2	HNRNPC	sp|P07910|HNRPC_HUMAN Heterogeneous nuclear ribonucleoproteins C1/C2 OS=Homo sapiens OX=9606 GN=HNRNPC PE=1 SV=4	2	13	13	7	11	1	10	10	8	9	10	11	1	10	10	8	9	10	5	1	6	5	4	5	6	34	34	23.5	33.67	306	306;291	0	35.751	By MS/MS	By matching	By MS/MS	By MS/MS	By MS/MS	By MS/MS	By MS/MS	27.8	2.3
P07919;A0A096LP55	P07919;A0A096LP55	2;1	2;1	2;1	Cytochrome b-c1 complex subunit 6, mitochondrial;Cytochrome b-c1 complex subunit 6	UQCRH;UQCRHL	sp|P07919|QCR6_HUMAN Cytochrome b-c1 complex subunit 6, mitochondrial OS=Homo sapiens OX=9606 GN=UQCRH PE=1 SV=2;sp|A0A096LP55|QCR6L_HUMAN Cytochrome b-c1 complex subunit 6-like, mitochondrial OS=Homo sapiens OX=9606 GN=UQCRHL PE=3 SV=1	2	2	2	2	1	0	1	0	1	2	0	1	0	1	0	1	2	0	1	0	1	0	1	2	0	28.6	28.6	28.6	10.739	91	91;91	0	73.501	By MS/MS		By matching		By matching	By MS/MS		19.8	0
P07954	P07954	9	9	9	Fumarate hydratase, mitochondrial	FH	sp|P07954|FUMH_HUMAN Fumarate hydratase, mitochondrial OS=Homo sapiens OX=9606 GN=FH PE=1 SV=3	1	9	9	9	6	0	2	1	4	7	1	6	0	2	1	4	7	1	6	0	2	1	4	7	1	22.4	22.4	22.4	54.636	510	510	0	20.354	By MS/MS		By matching	By matching	By matching	By MS/MS	By matching	16.3	0
P08133	P08133	13	13	13	Annexin A6	ANXA6	sp|P08133|ANXA6_HUMAN Annexin A6 OS=Homo sapiens OX=9606 GN=ANXA6 PE=1 SV=3	1	13	13	13	9	0	0	0	6	9	1	9	0	0	0	6	9	1	9	0	0	0	6	9	1	21.7	21.7	21.7	75.872	673	673	0	46.692	By MS/MS				By MS/MS	By MS/MS	By matching	16.6	0
P08134	P08134	7	1	1	Rho-related GTP-binding protein RhoC	RHOC	sp|P08134|RHOC_HUMAN Rho-related GTP-binding protein RhoC OS=Homo sapiens OX=9606 GN=RHOC PE=1 SV=1	1	7	1	1	7	0	3	4	7	3	1	1	0	0	1	1	0	0	1	0	0	1	1	0	0	29	6.2	6.2	22.006	193	193	0	3.4573	By MS/MS		By matching	By matching	By MS/MS	By matching	By matching	29	0
P08174	P08174	6	6	6	Complement decay-accelerating factor	CD55	sp|P08174|DAF_HUMAN Complement decay-accelerating factor OS=Homo sapiens OX=9606 GN=CD55 PE=1 SV=4	1	6	6	6	5	0	1	1	1	6	2	5	0	1	1	1	6	2	5	0	1	1	1	6	2	15.2	15.2	15.2	41.4	381	381	0	17.169	By MS/MS		By MS/MS	By MS/MS	By matching	By MS/MS	By matching	10.2	0
P08195	P08195	20	20	20	4F2 cell-surface antigen heavy chain	SLC3A2	sp|P08195|4F2_HUMAN 4F2 cell-surface antigen heavy chain OS=Homo sapiens OX=9606 GN=SLC3A2 PE=1 SV=3	1	20	20	20	16	0	13	11	14	19	7	16	0	13	11	14	19	7	16	0	13	11	14	19	7	35.4	35.4	35.4	67.993	630	630	0	228.85	By MS/MS		By MS/MS	By MS/MS	By MS/MS	By MS/MS	By MS/MS	29.8	0
P08237	P08237	4	3	3	ATP-dependent 6-phosphofructokinase, muscle type	PFKM	sp|P08237|PFKAM_HUMAN ATP-dependent 6-phosphofructokinase, muscle type OS=Homo sapiens OX=9606 GN=PFKM PE=1 SV=2	1	4	3	3	2	0	1	0	0	3	1	1	0	0	0	0	2	0	1	0	0	0	0	2	0	5.8	4.6	4.6	85.182	780	780	0	4.5356	By MS/MS		By matching			By MS/MS	By matching	2.6	0
P08238;Q58FF7	P08238	41;16	41;16	23;6	Heat shock protein HSP 90-beta	HSP90AB1	sp|P08238|HS90B_HUMAN Heat shock protein HSP 90-beta OS=Homo sapiens OX=9606 GN=HSP90AB1 PE=1 SV=4	2	41	41	23	27	2	21	21	22	39	26	27	2	21	21	22	39	26	13	1	11	11	12	21	14	53.5	53.5	32	83.263	724	724;597	0	323.31	By MS/MS	By matching	By MS/MS	By MS/MS	By MS/MS	By MS/MS	By MS/MS	36	2.2
P08243	P08243	3	3	3	Asparagine synthetase [glutamine-hydrolyzing]	ASNS	sp|P08243|ASNS_HUMAN Asparagine synthetase [glutamine-hydrolyzing] OS=Homo sapiens OX=9606 GN=ASNS PE=1 SV=4	1	3	3	3	0	0	0	0	0	3	0	0	0	0	0	0	3	0	0	0	0	0	0	3	0	6.1	6.1	6.1	64.369	561	561	0	6.876						By MS/MS		0	0
P08559;P29803	P08559	6;1	6;1	6;1	Pyruvate dehydrogenase E1 component subunit alpha, somatic form, mitochondrial	PDHA1	sp|P08559|ODPA_HUMAN Pyruvate dehydrogenase E1 component subunit alpha, somatic form, mitochondrial OS=Homo sapiens OX=9606 GN=PDHA1 PE=1 SV=3	2	6	6	6	3	0	2	2	3	5	0	3	0	2	2	3	5	0	3	0	2	2	3	5	0	13.1	13.1	13.1	43.295	390	390;388	0	9.1522	By matching		By matching	By matching	By MS/MS	By MS/MS		6.4	0
P08574	P08574	4	4	4	Cytochrome c1, heme protein, mitochondrial	CYC1	sp|P08574|CY1_HUMAN Cytochrome c1, heme protein, mitochondrial OS=Homo sapiens OX=9606 GN=CYC1 PE=1 SV=3	1	4	4	4	3	0	0	1	2	3	0	3	0	0	1	2	3	0	3	0	0	1	2	3	0	14.8	14.8	14.8	35.422	325	325	0	8.8074	By MS/MS			By matching	By MS/MS	By MS/MS		10.8	0
P08579	P08579	2	1	1	U2 small nuclear ribonucleoprotein B	SNRPB2	sp|P08579|RU2B_HUMAN U2 small nuclear ribonucleoprotein B OS=Homo sapiens OX=9606 GN=SNRPB2 PE=1 SV=1	1	2	1	1	1	0	0	1	1	1	0	0	0	0	0	0	1	0	0	0	0	0	0	1	0	8.4	4.9	4.9	25.486	225	225	0	5.4479	By matching			By matching	By matching	By MS/MS		3.6	0
P08621	P08621	8	8	8	U1 small nuclear ribonucleoprotein 70 kDa	SNRNP70	sp|P08621|RU17_HUMAN U1 small nuclear ribonucleoprotein 70 kDa OS=Homo sapiens OX=9606 GN=SNRNP70 PE=1 SV=2	1	8	8	8	1	0	0	0	0	8	0	1	0	0	0	0	8	0	1	0	0	0	0	8	0	22.7	22.7	22.7	51.556	437	437	0	20.425	By matching					By MS/MS		3	0
P08648	P08648	7	7	7	Integrin alpha-5;Integrin alpha-5 heavy chain;Integrin alpha-5 light chain	ITGA5	sp|P08648|ITA5_HUMAN Integrin alpha-5 OS=Homo sapiens OX=9606 GN=ITGA5 PE=1 SV=2	1	7	7	7	3	0	1	1	4	6	2	3	0	1	1	4	6	2	3	0	1	1	4	6	2	6.5	6.5	6.5	114.54	1049	1049	0	11.927	By matching		By matching	By matching	By MS/MS	By MS/MS	By matching	3.1	0
P08670;P41219;P17661;Q16352;P07196;P07197	P08670	47;4;4;1;1;1	47;4;4;1;1;1	41;2;1;0;0;0	Vimentin	VIM	sp|P08670|VIME_HUMAN Vimentin OS=Homo sapiens OX=9606 GN=VIM PE=1 SV=4	6	47	47	41	35	1	32	29	36	42	35	35	1	32	29	36	42	35	31	0	28	26	33	37	30	82.6	82.6	76.8	53.651	466	466;470;470;499;543;916	0	323.31	By MS/MS	By matching	By MS/MS	By MS/MS	By MS/MS	By MS/MS	By MS/MS	69.7	1.7
P08708	P08708	9	9	9	40S ribosomal protein S17	RPS17	sp|P08708|RS17_HUMAN 40S ribosomal protein S17 OS=Homo sapiens OX=9606 GN=RPS17 PE=1 SV=2	1	9	9	9	6	0	3	2	5	7	3	6	0	3	2	5	7	3	6	0	3	2	5	7	3	45.9	45.9	45.9	15.55	135	135	0	20.733	By MS/MS		By matching	By matching	By MS/MS	By MS/MS	By matching	32.6	0
P08754;P63096;P19087;P11488;P09471;A8MTJ3;P38405	P08754;P63096	11;7;3;2;2;2;1	11;7;3;2;2;2;1	4;0;0;0;0;0;0	Guanine nucleotide-binding protein G(k) subunit alpha;Guanine nucleotide-binding protein G(i) subunit alpha-1	GNAI3;GNAI1	sp|P08754|GNAI3_HUMAN Guanine nucleotide-binding protein G(k) subunit alpha OS=Homo sapiens OX=9606 GN=GNAI3 PE=1 SV=3;sp|P63096|GNAI1_HUMAN Guanine nucleotide-binding protein G(i) subunit alpha-1 OS=Homo sapiens OX=9606 GN=GNAI1 PE=1 SV=2	7	11	11	4	5	0	5	5	5	10	2	5	0	5	5	5	10	2	1	0	1	1	1	4	0	34.2	34.2	13	40.532	354	354;354;354;350;354;354;381	0	26.332	By MS/MS		By MS/MS	By MS/MS	By MS/MS	By MS/MS	By matching	15.8	0
P08758	P08758	15	15	15	Annexin A5	ANXA5	sp|P08758|ANXA5_HUMAN Annexin A5 OS=Homo sapiens OX=9606 GN=ANXA5 PE=1 SV=2	1	15	15	15	12	0	7	6	11	15	7	12	0	7	6	11	15	7	12	0	7	6	11	15	7	44.4	44.4	44.4	35.936	320	320	0	169.7	By MS/MS		By MS/MS	By MS/MS	By MS/MS	By MS/MS	By MS/MS	34.1	0
P08865	P08865	9	9	9	40S ribosomal protein SA	RPSA	sp|P08865|RSSA_HUMAN 40S ribosomal protein SA OS=Homo sapiens OX=9606 GN=RPSA PE=1 SV=4	1	9	9	9	8	0	8	7	7	9	5	8	0	8	7	7	9	5	8	0	8	7	7	9	5	42.7	42.7	42.7	32.854	295	295	0	171.52	By MS/MS		By MS/MS	By MS/MS	By MS/MS	By MS/MS	By MS/MS	37.6	0
P09012	P09012	4	4	3	U1 small nuclear ribonucleoprotein A	SNRPA	sp|P09012|SNRPA_HUMAN U1 small nuclear ribonucleoprotein A OS=Homo sapiens OX=9606 GN=SNRPA PE=1 SV=3	1	4	4	3	2	0	1	2	2	3	0	2	0	1	2	2	3	0	1	0	1	1	1	3	0	16	16	13.1	31.279	282	282	0	6.6922	By MS/MS		By matching	By matching	By MS/MS	By MS/MS		9.6	0
P09038	P09038	3	3	3	Fibroblast growth factor 2	FGF2	sp|P09038|FGF2_HUMAN Fibroblast growth factor 2 OS=Homo sapiens OX=9606 GN=FGF2 PE=1 SV=3	1	3	3	3	1	0	0	0	1	3	1	1	0	0	0	1	3	1	1	0	0	0	1	3	1	9	9	9	30.77	288	288	0	10.668	By matching				By matching	By MS/MS	By matching	2.8	0
P09211	P09211	11	11	11	Glutathione S-transferase P	GSTP1	sp|P09211|GSTP1_HUMAN Glutathione S-transferase P OS=Homo sapiens OX=9606 GN=GSTP1 PE=1 SV=2	1	11	11	11	8	0	7	6	8	9	6	8	0	7	6	8	9	6	8	0	7	6	8	9	6	64.3	64.3	64.3	23.356	210	210	0	244.85	By MS/MS		By MS/MS	By MS/MS	By MS/MS	By MS/MS	By MS/MS	49.5	0
P09234	P09234	3	3	3	U1 small nuclear ribonucleoprotein C	SNRPC	sp|P09234|RU1C_HUMAN U1 small nuclear ribonucleoprotein C OS=Homo sapiens OX=9606 GN=SNRPC PE=1 SV=1	1	3	3	3	1	0	1	0	0	3	1	1	0	1	0	0	3	1	1	0	1	0	0	3	1	24.5	24.5	24.5	17.394	159	159	0	5.8319	By matching		By matching			By MS/MS	By matching	5.7	0
P09382	P09382	9	9	9	Galectin-1	LGALS1	sp|P09382|LEG1_HUMAN Galectin-1 OS=Homo sapiens OX=9606 GN=LGALS1 PE=1 SV=2	1	9	9	9	8	0	6	5	8	7	5	8	0	6	5	8	7	5	8	0	6	5	8	7	5	91.1	91.1	91.1	14.716	135	135	0	145.36	By MS/MS		By MS/MS	By MS/MS	By MS/MS	By MS/MS	By MS/MS	83.7	0
P09429;B2RPK0	P09429;B2RPK0	6;3	6;3	5;2	High mobility group protein B1;Putative high mobility group protein B1-like 1	HMGB1;HMGB1P1	sp|P09429|HMGB1_HUMAN High mobility group protein B1 OS=Homo sapiens OX=9606 GN=HMGB1 PE=1 SV=3;sp|B2RPK0|HGB1A_HUMAN Putative high mobility group protein B1-like 1 OS=Homo sapiens OX=9606 GN=HMGB1P1 PE=5 SV=1	2	6	6	5	4	0	4	4	4	5	3	4	0	4	4	4	5	3	4	0	4	4	4	4	3	34.9	34.9	29.3	24.893	215	215;211	0	37.869	By MS/MS		By MS/MS	By MS/MS	By MS/MS	By MS/MS	By MS/MS	20.9	0
P09488;Q03013	P09488;Q03013	10;6	10;6	4;1	Glutathione S-transferase Mu 1;Glutathione S-transferase Mu 4	GSTM1;GSTM4	sp|P09488|GSTM1_HUMAN Glutathione S-transferase Mu 1 OS=Homo sapiens OX=9606 GN=GSTM1 PE=1 SV=3;sp|Q03013|GSTM4_HUMAN Glutathione S-transferase Mu 4 OS=Homo sapiens OX=9606 GN=GSTM4 PE=1 SV=3	2	10	10	4	4	0	0	0	3	8	0	4	0	0	0	3	8	0	2	0	0	0	2	3	0	45.9	45.9	17.9	25.712	218	218;218	0	28.131	By MS/MS				By MS/MS	By MS/MS		22.9	0
P09493	P09493	18	18	5	Tropomyosin alpha-1 chain	TPM1	sp|P09493|TPM1_HUMAN Tropomyosin alpha-1 chain OS=Homo sapiens OX=9606 GN=TPM1 PE=1 SV=2	1	18	18	5	11	0	10	8	9	18	10	11	0	10	8	9	18	10	3	0	2	2	3	5	3	33.8	33.8	18	32.708	284	284	0	280.43	By MS/MS		By MS/MS	By MS/MS	By MS/MS	By MS/MS	By MS/MS	26.1	0
P09496	P09496	7	7	7	Clathrin light chain A	CLTA	sp|P09496|CLCA_HUMAN Clathrin light chain A OS=Homo sapiens OX=9606 GN=CLTA PE=1 SV=1	1	7	7	7	4	0	1	1	1	6	1	4	0	1	1	1	6	1	4	0	1	1	1	6	1	17.3	17.3	17.3	27.076	248	248	0	14.498	By MS/MS		By matching	By matching	By MS/MS	By MS/MS	By MS/MS	10.5	0
P09497	P09497	6	6	6	Clathrin light chain B	CLTB	sp|P09497|CLCB_HUMAN Clathrin light chain B OS=Homo sapiens OX=9606 GN=CLTB PE=1 SV=1	1	6	6	6	2	0	2	1	1	6	1	2	0	2	1	1	6	1	2	0	2	1	1	6	1	24.5	24.5	24.5	25.19	229	229	0	16.159	By MS/MS		By matching	By matching	By matching	By MS/MS	By matching	8.7	0
P09525	P09525	6	6	6	Annexin A4	ANXA4	sp|P09525|ANXA4_HUMAN Annexin A4 OS=Homo sapiens OX=9606 GN=ANXA4 PE=1 SV=4	1	6	6	6	3	0	0	0	3	5	0	3	0	0	0	3	5	0	3	0	0	0	3	5	0	18.8	18.8	18.8	35.882	319	319	0	14.057	By MS/MS				By MS/MS	By MS/MS		10	0
P09543	P09543	2	2	2	2,3-cyclic-nucleotide 3-phosphodiesterase	CNP	sp|P09543|CN37_HUMAN 2,3-cyclic-nucleotide 3-phosphodiesterase OS=Homo sapiens OX=9606 GN=CNP PE=1 SV=2	1	2	2	2	0	0	0	0	1	2	0	0	0	0	0	1	2	0	0	0	0	0	1	2	0	5.9	5.9	5.9	47.578	421	421	0	7.7092					By MS/MS	By MS/MS		0	0
P09601	P09601	3	3	3	Heme oxygenase 1	HMOX1	sp|P09601|HMOX1_HUMAN Heme oxygenase 1 OS=Homo sapiens OX=9606 GN=HMOX1 PE=1 SV=1	1	3	3	3	1	0	0	0	0	3	1	1	0	0	0	0	3	1	1	0	0	0	0	3	1	12.5	12.5	12.5	32.818	288	288	0	8.1797	By matching					By MS/MS	By matching	3.8	0
P09622	P09622	9	9	9	Dihydrolipoyl dehydrogenase, mitochondrial	DLD	sp|P09622|DLDH_HUMAN Dihydrolipoyl dehydrogenase, mitochondrial OS=Homo sapiens OX=9606 GN=DLD PE=1 SV=2	1	9	9	9	6	0	2	2	2	5	1	6	0	2	2	2	5	1	6	0	2	2	2	5	1	21.4	21.4	21.4	54.177	509	509	0	31.287	By MS/MS		By matching	By MS/MS	By MS/MS	By MS/MS	By matching	13.9	0
P09651;Q32P51	P09651;Q32P51	18;11	17;10	15;8	Heterogeneous nuclear ribonucleoprotein A1;Heterogeneous nuclear ribonucleoprotein A1, N-terminally processed;Heterogeneous nuclear ribonucleoprotein A1-like 2	HNRNPA1;HNRNPA1L2	sp|P09651|ROA1_HUMAN Heterogeneous nuclear ribonucleoprotein A1 OS=Homo sapiens OX=9606 GN=HNRNPA1 PE=1 SV=5;sp|Q32P51|RA1L2_HUMAN Heterogeneous nuclear ribonucleoprotein A1-like 2 OS=Homo sapiens OX=9606 GN=HNRNPA1L2 PE=2 SV=2	2	18	17	15	12	0	12	12	12	17	10	12	0	12	12	12	16	9	12	0	12	12	12	14	9	49.2	46.8	46.8	38.746	372	372;320	0	197.89	By MS/MS		By MS/MS	By MS/MS	By MS/MS	By MS/MS	By MS/MS	32.5	0
P09661	P09661	4	4	4	U2 small nuclear ribonucleoprotein A	SNRPA1	sp|P09661|RU2A_HUMAN U2 small nuclear ribonucleoprotein A OS=Homo sapiens OX=9606 GN=SNRPA1 PE=1 SV=2	1	4	4	4	3	0	1	3	3	2	0	3	0	1	3	3	2	0	3	0	1	3	3	2	0	19.6	19.6	19.6	28.415	255	255	0	19.186	By MS/MS		By matching	By matching	By matching	By MS/MS		16.5	0
P09669	P09669	2	2	2	Cytochrome c oxidase subunit 6C	COX6C	sp|P09669|COX6C_HUMAN Cytochrome c oxidase subunit 6C OS=Homo sapiens OX=9606 GN=COX6C PE=1 SV=2	1	2	2	2	1	0	0	0	1	1	0	1	0	0	0	1	1	0	1	0	0	0	1	1	0	20	20	20	8.7813	75	75	0.0047847	1.6865	By MS/MS				By MS/MS	By MS/MS		10.7	0
P09874	P09874	19	19	19	Poly [ADP-ribose] polymerase 1	PARP1	sp|P09874|PARP1_HUMAN Poly [ADP-ribose] polymerase 1 OS=Homo sapiens OX=9606 GN=PARP1 PE=1 SV=4	1	19	19	19	8	0	7	7	5	15	1	8	0	7	7	5	15	1	8	0	7	7	5	15	1	24.1	24.1	24.1	113.08	1014	1014	0	56.269	By MS/MS		By matching	By matching	By matching	By MS/MS	By MS/MS	11.2	0
P09960	P09960	8	8	8	Leukotriene A-4 hydrolase	LTA4H	sp|P09960|LKHA4_HUMAN Leukotriene A-4 hydrolase OS=Homo sapiens OX=9606 GN=LTA4H PE=1 SV=2	1	8	8	8	6	0	2	2	4	5	0	6	0	2	2	4	5	0	6	0	2	2	4	5	0	17.3	17.3	17.3	69.284	611	611	0	19.965	By MS/MS		By matching	By matching	By matching	By MS/MS		12.3	0
P09972	P09972	5	1	1	Fructose-bisphosphate aldolase C	ALDOC	sp|P09972|ALDOC_HUMAN Fructose-bisphosphate aldolase C OS=Homo sapiens OX=9606 GN=ALDOC PE=1 SV=2	1	5	1	1	2	0	0	0	1	5	2	0	0	0	0	0	1	0	0	0	0	0	0	1	0	17.9	6.3	6.3	39.455	364	364	0.00068353	3.0785	By matching				By matching	By MS/MS	By matching	3.8	0
Q71UI9;P0C0S5	Q71UI9;P0C0S5	4;4	2;2	2;2	Histone H2A.V;Histone H2A.Z	H2AFV;H2AFZ	sp|Q71UI9|H2AV_HUMAN Histone H2A.V OS=Homo sapiens OX=9606 GN=H2AFV PE=1 SV=3;sp|P0C0S5|H2AZ_HUMAN Histone H2A.Z OS=Homo sapiens OX=9606 GN=H2AFZ PE=1 SV=2	2	4	2	2	4	0	4	4	4	4	2	2	0	2	2	2	2	0	2	0	2	2	2	2	0	31.2	18.8	18.8	13.509	128	128;128	0	5.175	By MS/MS		By MS/MS	By MS/MS	By MS/MS	By MS/MS	By matching	31.2	0
P47985;P0C7P4	P47985;P0C7P4	3;3	3;3	3;3	Cytochrome b-c1 complex subunit Rieske, mitochondrial;Cytochrome b-c1 complex subunit 11;Putative cytochrome b-c1 complex subunit Rieske-like protein 1	UQCRFS1;UQCRFS1P1	sp|P47985|UCRI_HUMAN Cytochrome b-c1 complex subunit Rieske, mitochondrial OS=Homo sapiens OX=9606 GN=UQCRFS1 PE=1 SV=2;sp|P0C7P4|UCRIL_HUMAN Putative cytochrome b-c1 complex subunit Rieske-like protein 1 OS=Homo sapiens OX=9606 GN=UQCRFS1P1 PE=5 SV=1	2	3	3	3	1	0	0	0	0	3	0	1	0	0	0	0	3	0	1	0	0	0	0	3	0	8.4	8.4	8.4	29.668	274	274;283	0.00068823	3.1889	By MS/MS					By MS/MS		3.3	0
P0DMV9;P0DMV8	P0DMV9;P0DMV8	28;28	25;25	13;13	Heat shock 70 kDa protein 1B;Heat shock 70 kDa protein 1A	HSPA1B;HSPA1A	sp|P0DMV9|HS71B_HUMAN Heat shock 70 kDa protein 1B OS=Homo sapiens OX=9606 GN=HSPA1B PE=1 SV=1;sp|P0DMV8|HS71A_HUMAN Heat shock 70 kDa protein 1A OS=Homo sapiens OX=9606 GN=HSPA1A PE=1 SV=1	2	28	25	13	22	0	14	13	18	24	15	20	0	12	12	16	21	13	12	0	6	5	9	11	5	55.4	52	30.6	70.051	641	641;641	0	251.1	By MS/MS		By MS/MS	By MS/MS	By MS/MS	By MS/MS	By MS/MS	42	0
P0DN76;Q01081	P0DN76;Q01081	2;2	2;2	2;2	Splicing factor U2AF 35 kDa subunit	U2AF1	sp|P0DN76|U2AF5_HUMAN Splicing factor U2AF 35 kDa subunit-like protein OS=Homo sapiens OX=9606 GN=U2AF1L5 PE=1 SV=1;sp|Q01081|U2AF1_HUMAN Splicing factor U2AF 35 kDa subunit OS=Homo sapiens OX=9606 GN=U2AF1 PE=1 SV=3	2	2	2	2	0	0	1	0	0	2	1	0	0	1	0	0	2	1	0	0	1	0	0	2	1	8.8	8.8	8.8	27.872	240	240;240	0	46.561			By matching			By MS/MS	By matching	0	0
P0DN79;P35520	P0DN79;P35520	2;2	2;2	2;2	Cystathionine beta-synthase	CBS	sp|P0DN79|CBSL_HUMAN Cystathionine beta-synthase-like protein OS=Homo sapiens OX=9606 GN=CBSL PE=1 SV=1;sp|P35520|CBS_HUMAN Cystathionine beta-synthase OS=Homo sapiens OX=9606 GN=CBS PE=1 SV=2	2	2	2	2	0	0	0	0	0	2	0	0	0	0	0	0	2	0	0	0	0	0	0	2	0	3.8	3.8	3.8	60.586	551	551;551	0	6.5357						By MS/MS		0	0
P0DP25;P0DP24;P0DP23;P27482;P02585	P0DP25;P0DP24;P0DP23	8;8;8;2;1	8;8;8;2;1	8;8;8;2;1			sp|P0DP25|CALM3_HUMAN Calmodulin-3 OS=Homo sapiens OX=9606 GN=CALM3 PE=1 SV=1;sp|P0DP24|CALM2_HUMAN Calmodulin-2 OS=Homo sapiens OX=9606 GN=CALM2 PE=1 SV=1;sp|P0DP23|CALM1_HUMAN Calmodulin-1 OS=Homo sapiens OX=9606 GN=CALM1 PE=1 SV=1	5	8	8	8	4	0	4	4	4	7	1	4	0	4	4	4	7	1	4	0	4	4	4	7	1	45.6	45.6	45.6	16.837	149	149;149;149;149;160	0	51.162	By MS/MS		By MS/MS	By MS/MS	By MS/MS	By MS/MS	By matching	26.8	0
P10155	P10155	4	4	4	60 kDa SS-A/Ro ribonucleoprotein	TROVE2	sp|P10155|RO60_HUMAN 60 kDa SS-A/Ro ribonucleoprotein OS=Homo sapiens OX=9606 GN=TROVE2 PE=1 SV=2	1	4	4	4	1	0	1	1	1	3	0	1	0	1	1	1	3	0	1	0	1	1	1	3	0	8.4	8.4	8.4	60.67	538	538	0	7.7376	By MS/MS		By matching	By matching	By matching	By MS/MS		2	0
P10316;P01892	P10316;P01892	10;9	1;1	0;0	HLA class I histocompatibility antigen, A-69 alpha chain;HLA class I histocompatibility antigen, A-2 alpha chain	HLA-A	sp|P10316|1A69_HUMAN HLA class I histocompatibility antigen, A-69 alpha chain OS=Homo sapiens OX=9606 GN=HLA-A PE=1 SV=2;sp|P01892|1A02_HUMAN HLA class I histocompatibility antigen, A-2 alpha chain OS=Homo sapiens OX=9606 GN=HLA-A PE=1 SV=1	2	10	1	0	4	0	3	2	3	9	2	0	0	0	0	0	1	1	0	0	0	0	0	0	0	37.3	2.7	0	40.976	365	365;365	0.00067069	2.7817	By matching		By matching	By matching	By matching	By MS/MS	By matching	15.3	0
P10321	P10321	4	1	1	HLA class I histocompatibility antigen, Cw-7 alpha chain	HLA-C	sp|P10321|1C07_HUMAN HLA class I histocompatibility antigen, Cw-7 alpha chain OS=Homo sapiens OX=9606 GN=HLA-C PE=1 SV=3	1	4	1	1	2	0	1	1	1	4	0	1	0	0	0	0	1	0	1	0	0	0	0	1	0	16.7	4.4	4.4	40.648	366	366	0	4.6143	By matching		By matching	By matching	By matching	By MS/MS		6.8	0
P10412	P10412	10	3	2	Histone H1.4	HIST1H1E	sp|P10412|H14_HUMAN Histone H1.4 OS=Homo sapiens OX=9606 GN=HIST1H1E PE=1 SV=2	1	10	3	2	8	0	7	9	8	4	3	2	0	1	2	1	0	0	1	0	0	1	1	0	0	26.5	16	9.6	21.865	219	219	0	8.5829	By MS/MS		By matching	By MS/MS	By matching	By matching	By matching	26.5	0
P10523	P10523	1	1	1	S-arrestin	SAG	sp|P10523|ARRS_HUMAN S-arrestin OS=Homo sapiens OX=9606 GN=SAG PE=1 SV=3	1	1	1	1	0	0	0	0	0	1	1	0	0	0	0	0	1	1	0	0	0	0	0	1	1	1.7	1.7	1.7	45.119	405	405	0.0074627	1.3966						By MS/MS	By matching	0	0
P10599	P10599	8	8	8	Thioredoxin	TXN	sp|P10599|THIO_HUMAN Thioredoxin OS=Homo sapiens OX=9606 GN=TXN PE=1 SV=3	1	8	8	8	7	0	6	6	6	5	3	7	0	6	6	6	5	3	7	0	6	6	6	5	3	65.7	65.7	65.7	11.737	105	105	0	60.833	By MS/MS		By MS/MS	By MS/MS	By MS/MS	By MS/MS	By MS/MS	65.7	0
P10606	P10606	3	3	3	Cytochrome c oxidase subunit 5B, mitochondrial	COX5B	sp|P10606|COX5B_HUMAN Cytochrome c oxidase subunit 5B, mitochondrial OS=Homo sapiens OX=9606 GN=COX5B PE=1 SV=2	1	3	3	3	2	0	1	0	2	2	1	2	0	1	0	2	2	1	2	0	1	0	2	2	1	24.8	24.8	24.8	13.696	129	129	0	8.2483	By MS/MS		By matching		By MS/MS	By MS/MS	By matching	15.5	0
P10620	P10620	1	1	1	Microsomal glutathione S-transferase 1	MGST1	sp|P10620|MGST1_HUMAN Microsomal glutathione S-transferase 1 OS=Homo sapiens OX=9606 GN=MGST1 PE=1 SV=1	1	1	1	1	1	0	1	1	1	1	0	1	0	1	1	1	1	0	1	0	1	1	1	1	0	8.4	8.4	8.4	17.598	155	155	0	5.6965	By MS/MS		By matching	By matching	By MS/MS	By MS/MS		8.4	0
P10644	P10644	3	3	3	cAMP-dependent protein kinase type I-alpha regulatory subunit;cAMP-dependent protein kinase type I-alpha regulatory subunit, N-terminally processed	PRKAR1A	sp|P10644|KAP0_HUMAN cAMP-dependent protein kinase type I-alpha regulatory subunit OS=Homo sapiens OX=9606 GN=PRKAR1A PE=1 SV=1	1	3	3	3	1	0	0	0	1	3	1	1	0	0	0	1	3	1	1	0	0	0	1	3	1	7.6	7.6	7.6	42.981	381	381	0	4.096	By MS/MS				By matching	By MS/MS	By matching	2.6	0
P10768	P10768	4	4	4	S-formylglutathione hydrolase	ESD	sp|P10768|ESTD_HUMAN S-formylglutathione hydrolase OS=Homo sapiens OX=9606 GN=ESD PE=1 SV=2	1	4	4	4	4	0	0	0	3	2	1	4	0	0	0	3	2	1	4	0	0	0	3	2	1	19.5	19.5	19.5	31.462	282	282	0	9.1424	By MS/MS				By matching	By MS/MS	By matching	19.5	0
P10809	P10809	33	33	33	60 kDa heat shock protein, mitochondrial	HSPD1	sp|P10809|CH60_HUMAN 60 kDa heat shock protein, mitochondrial OS=Homo sapiens OX=9606 GN=HSPD1 PE=1 SV=2	1	33	33	33	30	0	26	25	24	25	21	30	0	26	25	24	25	21	30	0	26	25	24	25	21	68.4	68.4	68.4	61.054	573	573	0	323.31	By MS/MS		By MS/MS	By MS/MS	By MS/MS	By MS/MS	By MS/MS	63	0
P11021	P11021	30	29	29	78 kDa glucose-regulated protein	HSPA5	sp|P11021|BIP_HUMAN Endoplasmic reticulum chaperone BiP OS=Homo sapiens OX=9606 GN=HSPA5 PE=1 SV=2	1	30	29	29	26	0	24	20	24	22	16	25	0	23	19	23	21	15	25	0	23	19	23	21	15	51.5	49.1	49.1	72.332	654	654	0	288.77	By MS/MS		By MS/MS	By MS/MS	By MS/MS	By MS/MS	By MS/MS	48.6	0
P11047	P11047	5	5	5	Laminin subunit gamma-1	LAMC1	sp|P11047|LAMC1_HUMAN Laminin subunit gamma-1 OS=Homo sapiens OX=9606 GN=LAMC1 PE=1 SV=3	1	5	5	5	0	0	0	0	0	5	0	0	0	0	0	0	5	0	0	0	0	0	0	5	0	4	4	4	177.6	1609	1609	0	25.277						By MS/MS		0	0
P11142;P54652	P11142	33;14	33;14	28;9	Heat shock cognate 71 kDa protein	HSPA8	sp|P11142|HSP7C_HUMAN Heat shock cognate 71 kDa protein OS=Homo sapiens OX=9606 GN=HSPA8 PE=1 SV=1	2	33	33	28	30	0	23	24	25	27	20	30	0	23	24	25	27	20	26	0	19	21	21	23	16	61.9	61.9	57.1	70.897	646	646;639	0	323.31	By MS/MS		By MS/MS	By MS/MS	By MS/MS	By MS/MS	By MS/MS	55.3	0
P11166;P11169;Q8TDB8	P11166	3;1;1	3;1;1	3;1;1	Solute carrier family 2, facilitated glucose transporter member 1	SLC2A1	sp|P11166|GTR1_HUMAN Solute carrier family 2, facilitated glucose transporter member 1 OS=Homo sapiens OX=9606 GN=SLC2A1 PE=1 SV=2	3	3	3	3	2	0	0	1	2	3	0	2	0	0	1	2	3	0	2	0	0	1	2	3	0	6.7	6.7	6.7	54.083	492	492;496;520	0	9.8253	By MS/MS			By matching	By MS/MS	By MS/MS		3.3	0
P11172	P11172	4	4	4	Uridine 5-monophosphate synthase;Orotate phosphoribosyltransferase;Orotidine 5-phosphate decarboxylase	UMPS	sp|P11172|UMPS_HUMAN Uridine 5-monophosphate synthase OS=Homo sapiens OX=9606 GN=UMPS PE=1 SV=1	1	4	4	4	2	0	1	0	2	2	1	2	0	1	0	2	2	1	2	0	1	0	2	2	1	8.3	8.3	8.3	52.221	480	480	0	6.2305	By MS/MS		By matching		By matching	By MS/MS	By matching	4.4	0
P11177	P11177	2	2	2	Pyruvate dehydrogenase E1 component subunit beta, mitochondrial	PDHB	sp|P11177|ODPB_HUMAN Pyruvate dehydrogenase E1 component subunit beta, mitochondrial OS=Homo sapiens OX=9606 GN=PDHB PE=1 SV=3	1	2	2	2	1	0	1	1	1	1	1	1	0	1	1	1	1	1	1	0	1	1	1	1	1	6.1	6.1	6.1	39.233	359	359	0	8.3537	By MS/MS		By matching	By matching	By MS/MS	By MS/MS	By matching	3.1	0
P11233	P11233	4	4	3	Ras-related protein Ral-A	RALA	sp|P11233|RALA_HUMAN Ras-related protein Ral-A OS=Homo sapiens OX=9606 GN=RALA PE=1 SV=1	1	4	4	3	1	0	0	0	0	4	0	1	0	0	0	0	4	0	0	0	0	0	0	3	0	17.5	17.5	12.1	23.567	206	206	0	17.046	By matching					By MS/MS		5.3	0
P11234	P11234	2	1	1	Ras-related protein Ral-B	RALB	sp|P11234|RALB_HUMAN Ras-related protein Ral-B OS=Homo sapiens OX=9606 GN=RALB PE=1 SV=1	1	2	1	1	1	0	0	0	0	2	0	0	0	0	0	0	1	0	0	0	0	0	0	1	0	12.1	6.8	6.8	23.408	206	206	0.00065703	2.5752	By matching					By MS/MS		5.3	0
P11279	P11279	3	3	3	Lysosome-associated membrane glycoprotein 1	LAMP1	sp|P11279|LAMP1_HUMAN Lysosome-associated membrane glycoprotein 1 OS=Homo sapiens OX=9606 GN=LAMP1 PE=1 SV=3	1	3	3	3	1	0	1	1	1	2	2	1	0	1	1	1	2	2	1	0	1	1	1	2	2	8.6	8.6	8.6	44.882	417	417	0	66.393	By MS/MS		By MS/MS	By MS/MS	By matching	By MS/MS	By matching	3.8	0
P11310	P11310	4	4	4	Medium-chain specific acyl-CoA dehydrogenase, mitochondrial	ACADM	sp|P11310|ACADM_HUMAN Medium-chain specific acyl-CoA dehydrogenase, mitochondrial OS=Homo sapiens OX=9606 GN=ACADM PE=1 SV=1	1	4	4	4	2	0	0	0	0	3	0	2	0	0	0	0	3	0	2	0	0	0	0	3	0	11.6	11.6	11.6	46.588	421	421	0	6.854	By MS/MS					By MS/MS		6.4	0
P11387;Q969P6	P11387	6;1	6;1	6;1	DNA topoisomerase 1	TOP1	sp|P11387|TOP1_HUMAN DNA topoisomerase 1 OS=Homo sapiens OX=9606 GN=TOP1 PE=1 SV=2	2	6	6	6	3	0	3	2	1	6	0	3	0	3	2	1	6	0	3	0	3	2	1	6	0	8.6	8.6	8.6	90.725	765	765;601	0	11.743	By MS/MS		By matching	By matching	By matching	By MS/MS		4.7	0
P11388	P11388	2	2	2	DNA topoisomerase 2-alpha	TOP2A	sp|P11388|TOP2A_HUMAN DNA topoisomerase 2-alpha OS=Homo sapiens OX=9606 GN=TOP2A PE=1 SV=3	1	2	2	2	1	0	1	0	1	2	0	1	0	1	0	1	2	0	1	0	1	0	1	2	0	1.7	1.7	1.7	174.38	1531	1531	0	6.7763	By matching		By matching		By matching	By MS/MS		1.1	0
P11413	P11413	27	27	27	Glucose-6-phosphate 1-dehydrogenase	G6PD	sp|P11413|G6PD_HUMAN Glucose-6-phosphate 1-dehydrogenase OS=Homo sapiens OX=9606 GN=G6PD PE=1 SV=4	1	27	27	27	22	0	2	8	24	19	8	22	0	2	8	24	19	8	22	0	2	8	24	19	8	56.1	56.1	56.1	59.256	515	515	0	137.92	By MS/MS		By matching	By MS/MS	By MS/MS	By MS/MS	By MS/MS	47.6	0
P11586	P11586	32	32	31	C-1-tetrahydrofolate synthase, cytoplasmic;Methylenetetrahydrofolate dehydrogenase;Methenyltetrahydrofolate cyclohydrolase;Formyltetrahydrofolate synthetase;C-1-tetrahydrofolate synthase, cytoplasmic, N-terminally processed	MTHFD1	sp|P11586|C1TC_HUMAN C-1-tetrahydrofolate synthase, cytoplasmic OS=Homo sapiens OX=9606 GN=MTHFD1 PE=1 SV=3	1	32	32	31	28	0	11	11	23	25	4	28	0	11	11	23	25	4	28	0	11	11	23	24	4	35.8	35.8	35.1	101.56	935	935	0	116.57	By MS/MS		By matching	By matching	By MS/MS	By MS/MS	By MS/MS	33	0
P11766	P11766	10	10	10	Alcohol dehydrogenase class-3	ADH5	sp|P11766|ADHX_HUMAN Alcohol dehydrogenase class-3 OS=Homo sapiens OX=9606 GN=ADH5 PE=1 SV=4	1	10	10	10	5	0	1	2	4	7	2	5	0	1	2	4	7	2	5	0	1	2	4	7	2	37.2	37.2	37.2	39.724	374	374	0	40.842	By MS/MS		By matching	By matching	By MS/MS	By MS/MS	By matching	19	0
P11802	P11802	3	2	2	Cyclin-dependent kinase 4	CDK4	sp|P11802|CDK4_HUMAN Cyclin-dependent kinase 4 OS=Homo sapiens OX=9606 GN=CDK4 PE=1 SV=2	1	3	2	2	1	0	1	1	0	3	1	0	0	0	0	0	2	0	0	0	0	0	0	2	0	10.9	8.3	8.3	33.729	303	303	0	4.0373	By matching		By matching	By matching		By MS/MS	By matching	2.6	0
P11940;Q9H361;Q4VXU2;Q96DU9	P11940	19;8;4;1	19;8;4;1	11;6;2;1	Polyadenylate-binding protein 1	PABPC1	sp|P11940|PABP1_HUMAN Polyadenylate-binding protein 1 OS=Homo sapiens OX=9606 GN=PABPC1 PE=1 SV=2	4	19	19	11	16	0	11	9	12	11	8	16	0	11	9	12	11	8	9	0	7	5	6	8	5	33.6	33.6	16.2	70.67	636	636;631;614;382	0	125.1	By MS/MS		By MS/MS	By MS/MS	By MS/MS	By MS/MS	By MS/MS	30.3	0
P12004	P12004	10	10	10	Proliferating cell nuclear antigen	PCNA	sp|P12004|PCNA_HUMAN Proliferating cell nuclear antigen OS=Homo sapiens OX=9606 GN=PCNA PE=1 SV=1	1	10	10	10	8	0	7	5	6	9	2	8	0	7	5	6	9	2	8	0	7	5	6	9	2	37.9	37.9	37.9	28.768	261	261	0	69.535	By MS/MS		By MS/MS	By MS/MS	By MS/MS	By MS/MS	By MS/MS	34.5	0
P12081;P49590	P12081	15;3	15;3	15;3	Histidine--tRNA ligase, cytoplasmic	HARS	sp|P12081|SYHC_HUMAN Histidine--tRNA ligase, cytoplasmic OS=Homo sapiens OX=9606 GN=HARS PE=1 SV=2	2	15	15	15	11	0	1	2	8	10	2	11	0	1	2	8	10	2	11	0	1	2	8	10	2	35.2	35.2	35.2	57.41	509	509;506	0	37.171	By MS/MS		By matching	By matching	By MS/MS	By MS/MS	By matching	27.3	0
P12236;P12235	P12236;P12235	14;8	14;8	5;2	ADP/ATP translocase 3;ADP/ATP translocase 3, N-terminally processed;ADP/ATP translocase 1	SLC25A6;SLC25A4	sp|P12236|ADT3_HUMAN ADP/ATP translocase 3 OS=Homo sapiens OX=9606 GN=SLC25A6 PE=1 SV=4;sp|P12235|ADT1_HUMAN ADP/ATP translocase 1 OS=Homo sapiens OX=9606 GN=SLC25A4 PE=1 SV=4	2	14	14	5	9	1	7	6	8	13	7	9	1	7	6	8	13	7	3	0	2	2	2	4	2	48.7	48.7	22.1	32.866	298	298;298	0	40.293	By MS/MS	By matching	By MS/MS	By MS/MS	By MS/MS	By MS/MS	By MS/MS	35.6	3.4
P12268	P12268	17	17	16	Inosine-5-monophosphate dehydrogenase 2	IMPDH2	sp|P12268|IMDH2_HUMAN Inosine-5-monophosphate dehydrogenase 2 OS=Homo sapiens OX=9606 GN=IMPDH2 PE=1 SV=2	1	17	17	16	13	0	7	8	9	15	3	13	0	7	8	9	15	3	12	0	6	7	8	14	2	40.7	40.7	39.1	55.804	514	514	0	133.7	By MS/MS		By matching	By matching	By MS/MS	By MS/MS	By matching	31.5	0
P12270	P12270	13	13	13	Nucleoprotein TPR	TPR	sp|P12270|TPR_HUMAN Nucleoprotein TPR OS=Homo sapiens OX=9606 GN=TPR PE=1 SV=3	1	13	13	13	8	0	1	2	5	8	1	8	0	1	2	5	8	1	8	0	1	2	5	8	1	6.6	6.6	6.6	267.29	2363	2363	0	25.555	By MS/MS		By matching	By matching	By matching	By MS/MS	By matching	4.4	0
P12277	P12277	6	6	6	Creatine kinase B-type	CKB	sp|P12277|KCRB_HUMAN Creatine kinase B-type OS=Homo sapiens OX=9606 GN=CKB PE=1 SV=1	1	6	6	6	5	0	2	3	4	3	0	5	0	2	3	4	3	0	5	0	2	3	4	3	0	23.4	23.4	23.4	42.644	381	381	0	52.665	By MS/MS		By MS/MS	By MS/MS	By MS/MS	By MS/MS		17.6	0
P12429	P12429	18	18	18	Annexin A3	ANXA3	sp|P12429|ANXA3_HUMAN Annexin A3 OS=Homo sapiens OX=9606 GN=ANXA3 PE=1 SV=3	1	18	18	18	13	0	10	9	12	17	8	13	0	10	9	12	17	8	13	0	10	9	12	17	8	52	52	52	36.375	323	323	0	84.769	By MS/MS		By MS/MS	By MS/MS	By MS/MS	By MS/MS	By MS/MS	39.6	0
P12814;P35609;Q08043	P12814	46;14;11	28;3;2	28;3;2	Alpha-actinin-1	ACTN1	sp|P12814|ACTN1_HUMAN Alpha-actinin-1 OS=Homo sapiens OX=9606 GN=ACTN1 PE=1 SV=2	3	46	28	28	34	0	15	21	31	39	21	19	0	5	10	16	22	9	19	0	5	10	16	22	9	61.2	40.5	40.5	103.06	892	892;894;901	0	304.63	By MS/MS		By MS/MS	By matching	By MS/MS	By MS/MS	By MS/MS	43.5	0
P12956;P51449	P12956	29;1	29;1	29;1	X-ray repair cross-complementing protein 6	XRCC6	sp|P12956|XRCC6_HUMAN X-ray repair cross-complementing protein 6 OS=Homo sapiens OX=9606 GN=XRCC6 PE=1 SV=2	2	29	29	29	20	0	15	11	15	19	8	20	0	15	11	15	19	8	20	0	15	11	15	19	8	42.7	42.7	42.7	69.842	609	609;518	0	174.13	By MS/MS		By MS/MS	By MS/MS	By MS/MS	By MS/MS	By MS/MS	35	0
P13010	P13010	23	23	23	X-ray repair cross-complementing protein 5	XRCC5	sp|P13010|XRCC5_HUMAN X-ray repair cross-complementing protein 5 OS=Homo sapiens OX=9606 GN=XRCC5 PE=1 SV=3	1	23	23	23	16	0	10	7	10	18	4	16	0	10	7	10	18	4	16	0	10	7	10	18	4	37.6	37.6	37.6	82.704	732	732	0	112.67	By MS/MS		By MS/MS	By MS/MS	By MS/MS	By MS/MS	By MS/MS	25.3	0
P13073	P13073	3	3	3	Cytochrome c oxidase subunit 4 isoform 1, mitochondrial	COX4I1	sp|P13073|COX41_HUMAN Cytochrome c oxidase subunit 4 isoform 1, mitochondrial OS=Homo sapiens OX=9606 GN=COX4I1 PE=1 SV=1	1	3	3	3	2	0	1	1	1	3	1	2	0	1	1	1	3	1	2	0	1	1	1	3	1	18.9	18.9	18.9	19.576	169	169	0	4.6613	By MS/MS		By matching	By matching	By MS/MS	By MS/MS	By matching	12.4	0
P13473	P13473	3	3	3	Lysosome-associated membrane glycoprotein 2	LAMP2	sp|P13473|LAMP2_HUMAN Lysosome-associated membrane glycoprotein 2 OS=Homo sapiens OX=9606 GN=LAMP2 PE=1 SV=2	1	3	3	3	3	0	0	0	2	2	0	3	0	0	0	2	2	0	3	0	0	0	2	2	0	7.1	7.1	7.1	44.96	410	410	0	11.018	By MS/MS				By MS/MS	By MS/MS		7.1	0
P13489	P13489	8	8	8	Ribonuclease inhibitor	RNH1	sp|P13489|RINI_HUMAN Ribonuclease inhibitor OS=Homo sapiens OX=9606 GN=RNH1 PE=1 SV=2	1	8	8	8	7	0	1	1	5	7	0	7	0	1	1	5	7	0	7	0	1	1	5	7	0	24.7	24.7	24.7	49.973	461	461	0	56.442	By MS/MS		By matching	By matching	By MS/MS	By MS/MS		20.4	0
P13639	P13639	45	45	44	Elongation factor 2	EEF2	sp|P13639|EF2_HUMAN Elongation factor 2 OS=Homo sapiens OX=9606 GN=EEF2 PE=1 SV=4	1	45	45	44	38	1	22	19	25	35	22	38	1	22	19	25	35	22	37	1	21	18	24	34	21	61	61	59.8	95.337	858	858	0	323.31	By MS/MS	By matching	By MS/MS	By MS/MS	By MS/MS	By MS/MS	By MS/MS	56.9	0.9
P13667	P13667	9	9	9	Protein disulfide-isomerase A4	PDIA4	sp|P13667|PDIA4_HUMAN Protein disulfide-isomerase A4 OS=Homo sapiens OX=9606 GN=PDIA4 PE=1 SV=2	1	9	9	9	6	0	3	2	6	9	4	6	0	3	2	6	9	4	6	0	3	2	6	9	4	13.8	13.8	13.8	72.932	645	645	0	23.96	By MS/MS		By matching	By matching	By MS/MS	By MS/MS	By MS/MS	10.5	0
P13693;Q56UQ5;Q9HAU6	P13693	5;2;1	5;2;1	5;2;1	Translationally-controlled tumor protein	TPT1	sp|P13693|TCTP_HUMAN Translationally-controlled tumor protein OS=Homo sapiens OX=9606 GN=TPT1 PE=1 SV=1	3	5	5	5	3	0	2	1	3	5	1	3	0	2	1	3	5	1	3	0	2	1	3	5	1	25	25	25	19.595	172	172;140;139	0	23.642	By MS/MS		By matching	By matching	By MS/MS	By MS/MS	By matching	16.3	0
P13797;P13796;Q14651	P13797	31;4;2	31;4;2	31;4;2	Plastin-3	PLS3	sp|P13797|PLST_HUMAN Plastin-3 OS=Homo sapiens OX=9606 GN=PLS3 PE=1 SV=4	3	31	31	31	25	0	4	5	15	20	13	25	0	4	5	15	20	13	25	0	4	5	15	20	13	60.6	60.6	60.6	70.81	630	630;627;629	0	187.89	By MS/MS		By MS/MS	By MS/MS	By MS/MS	By MS/MS	By MS/MS	51.4	0
P13798	P13798	3	3	3	Acylamino-acid-releasing enzyme	APEH	sp|P13798|ACPH_HUMAN Acylamino-acid-releasing enzyme OS=Homo sapiens OX=9606 GN=APEH PE=1 SV=4	1	3	3	3	3	0	0	0	1	1	0	3	0	0	0	1	1	0	3	0	0	0	1	1	0	5.1	5.1	5.1	81.224	732	732	0	5.1479	By MS/MS				By matching	By MS/MS		5.1	0
P13804	P13804	7	7	7	Electron transfer flavoprotein subunit alpha, mitochondrial	ETFA	sp|P13804|ETFA_HUMAN Electron transfer flavoprotein subunit alpha, mitochondrial OS=Homo sapiens OX=9606 GN=ETFA PE=1 SV=1	1	7	7	7	5	0	1	0	1	4	1	5	0	1	0	1	4	1	5	0	1	0	1	4	1	30.6	30.6	30.6	35.079	333	333	0	15.187	By MS/MS		By matching		By matching	By MS/MS	By matching	25.5	0
P13861	P13861	3	3	3	cAMP-dependent protein kinase type II-alpha regulatory subunit	PRKAR2A	sp|P13861|KAP2_HUMAN cAMP-dependent protein kinase type II-alpha regulatory subunit OS=Homo sapiens OX=9606 GN=PRKAR2A PE=1 SV=2	1	3	3	3	2	0	0	0	1	3	0	2	0	0	0	1	3	0	2	0	0	0	1	3	0	9.2	9.2	9.2	45.518	404	404	0	9.4045	By MS/MS				By matching	By MS/MS		5.7	0
Q5VT79;P13928	Q5VT79;P13928	5;5	5;5	5;5	Annexin A8-like protein 2;Annexin A8	ANXA8L2;ANXA8	sp|Q5VT79|AXA81_HUMAN Annexin A8-like protein 1 OS=Homo sapiens OX=9606 GN=ANXA8L1 PE=2 SV=2;sp|P13928|ANXA8_HUMAN Annexin A8 OS=Homo sapiens OX=9606 GN=ANXA8 PE=1 SV=3	2	5	5	5	1	0	0	0	0	5	0	1	0	0	0	0	5	0	1	0	0	0	0	5	0	17.7	17.7	17.7	36.879	327	327;327	0	8.6322	By MS/MS					By MS/MS		4.6	0
P13929	P13929	7	3	3	Beta-enolase	ENO3	sp|P13929|ENOB_HUMAN Beta-enolase OS=Homo sapiens OX=9606 GN=ENO3 PE=1 SV=5	1	7	3	3	6	0	4	4	4	6	3	2	0	1	1	1	2	0	2	0	1	1	1	2	0	21.2	7.1	7.1	46.986	434	434	0	5.5036	By MS/MS		By matching	By matching	By matching	By MS/MS	By matching	19.4	0
P13984	P13984	3	3	3	General transcription factor IIF subunit 2	GTF2F2	sp|P13984|T2FB_HUMAN General transcription factor IIF subunit 2 OS=Homo sapiens OX=9606 GN=GTF2F2 PE=1 SV=2	1	3	3	3	2	0	0	0	1	2	0	2	0	0	0	1	2	0	2	0	0	0	1	2	0	16.9	16.9	16.9	28.38	249	249	0	5.9807	By MS/MS				By matching	By MS/MS		8.8	0
P13987	P13987	4	4	4	CD59 glycoprotein	CD59	sp|P13987|CD59_HUMAN CD59 glycoprotein OS=Homo sapiens OX=9606 GN=CD59 PE=1 SV=1	1	4	4	4	3	0	3	3	3	4	3	3	0	3	3	3	4	3	3	0	3	3	3	4	3	25	25	25	14.177	128	128	0	13.883	By MS/MS		By MS/MS	By MS/MS	By MS/MS	By MS/MS	By MS/MS	25	0
P14174	P14174	2	2	2	Macrophage migration inhibitory factor	MIF	sp|P14174|MIF_HUMAN Macrophage migration inhibitory factor OS=Homo sapiens OX=9606 GN=MIF PE=1 SV=4	1	2	2	2	2	0	1	1	2	1	0	2	0	1	1	2	1	0	2	0	1	1	2	1	0	17.4	17.4	17.4	12.476	115	115	0	13.053	By MS/MS		By MS/MS	By matching	By MS/MS	By MS/MS		17.4	0
P14209	P14209	1	1	1	CD99 antigen	CD99	sp|P14209|CD99_HUMAN CD99 antigen OS=Homo sapiens OX=9606 GN=CD99 PE=1 SV=1	1	1	1	1	0	0	0	0	0	1	0	0	0	0	0	0	1	0	0	0	0	0	0	1	0	5.4	5.4	5.4	18.848	185	185	0	3.4439						By MS/MS		0	0
P14314;Q9P2L0	P14314	14;1	14;1	14;1	Glucosidase 2 subunit beta	PRKCSH	sp|P14314|GLU2B_HUMAN Glucosidase 2 subunit beta OS=Homo sapiens OX=9606 GN=PRKCSH PE=1 SV=2	2	14	14	14	7	0	3	3	6	10	2	7	0	3	3	6	10	2	7	0	3	3	6	10	2	30.3	30.3	30.3	59.425	528	528;1181	0	67.132	By MS/MS		By MS/MS	By MS/MS	By MS/MS	By MS/MS	By MS/MS	12.3	0
P14324	P14324	8	8	8	Farnesyl pyrophosphate synthase	FDPS	sp|P14324|FPPS_HUMAN Farnesyl pyrophosphate synthase OS=Homo sapiens OX=9606 GN=FDPS PE=1 SV=4	1	8	8	8	5	0	3	3	4	7	3	5	0	3	3	4	7	3	5	0	3	3	4	7	3	18.9	18.9	18.9	48.275	419	419	0	22.573	By MS/MS		By matching	By matching	By MS/MS	By MS/MS	By matching	12.6	0
P14406	P14406	1	1	1	Cytochrome c oxidase subunit 7A2, mitochondrial	COX7A2	sp|P14406|CX7A2_HUMAN Cytochrome c oxidase subunit 7A2, mitochondrial OS=Homo sapiens OX=9606 GN=COX7A2 PE=1 SV=1	1	1	1	1	0	0	0	0	0	1	0	0	0	0	0	0	1	0	0	0	0	0	0	1	0	12	12	12	9.3959	83	83	0.0070134	1.518						By MS/MS		0	0
P14550	P14550	3	3	3	Alcohol dehydrogenase [NADP(+)]	AKR1A1	sp|P14550|AK1A1_HUMAN Alcohol dehydrogenase [NADP(+)] OS=Homo sapiens OX=9606 GN=AKR1A1 PE=1 SV=3	1	3	3	3	1	0	0	0	1	3	1	1	0	0	0	1	3	1	1	0	0	0	1	3	1	9.2	9.2	9.2	36.573	325	325	0	17.407	By MS/MS				By matching	By MS/MS	By matching	3.7	0
P14618;P30613	P14618	36;1	36;1	36;1	Pyruvate kinase PKM	PKM	sp|P14618|KPYM_HUMAN Pyruvate kinase PKM OS=Homo sapiens OX=9606 GN=PKM PE=1 SV=4	2	36	36	36	33	4	23	25	27	30	24	33	4	23	25	27	30	24	33	4	23	25	27	30	24	77.4	77.4	77.4	57.936	531	531;574	0	323.31	By MS/MS	By MS/MS	By MS/MS	By MS/MS	By MS/MS	By MS/MS	By MS/MS	69.9	9.4
P14625;Q58FF3	P14625	25;5	23;5	23;5	Endoplasmin	HSP90B1	sp|P14625|ENPL_HUMAN Endoplasmin OS=Homo sapiens OX=9606 GN=HSP90B1 PE=1 SV=1	2	25	23	23	17	0	15	14	15	19	8	15	0	14	13	14	17	6	15	0	14	13	14	17	6	33	31.3	31.3	92.468	803	803;399	0	118.53	By MS/MS		By MS/MS	By MS/MS	By MS/MS	By MS/MS	By MS/MS	23.8	0
P14635	P14635	2	2	2	G2/mitotic-specific cyclin-B1	CCNB1	sp|P14635|CCNB1_HUMAN G2/mitotic-specific cyclin-B1 OS=Homo sapiens OX=9606 GN=CCNB1 PE=1 SV=1	1	2	2	2	2	0	0	0	1	1	0	2	0	0	0	1	1	0	2	0	0	0	1	1	0	5.5	5.5	5.5	48.337	433	433	0.0053412	1.6299	By MS/MS				By matching	By MS/MS		5.5	0
P63162;P14678	P63162;P14678	4;4	4;4	4;4	Small nuclear ribonucleoprotein-associated protein N;Small nuclear ribonucleoprotein-associated proteins B and B	SNRPN;SNRPB	sp|P63162|RSMN_HUMAN Small nuclear ribonucleoprotein-associated protein N OS=Homo sapiens OX=9606 GN=SNRPN PE=1 SV=1;sp|P14678|RSMB_HUMAN Small nuclear ribonucleoprotein-associated proteins B and B OS=Homo sapiens OX=9606 GN=SNRPB PE=1 SV=2	2	4	4	4	3	0	1	2	2	2	1	3	0	1	2	2	2	1	3	0	1	2	2	2	1	12.5	12.5	12.5	24.614	240	240;240	0	4.3051	By MS/MS		By matching	By matching	By matching	By MS/MS	By matching	6.7	0
P14854	P14854	1	1	1	Cytochrome c oxidase subunit 6B1	COX6B1	sp|P14854|CX6B1_HUMAN Cytochrome c oxidase subunit 6B1 OS=Homo sapiens OX=9606 GN=COX6B1 PE=1 SV=2	1	1	1	1	0	0	0	0	0	1	0	0	0	0	0	0	1	0	0	0	0	0	0	1	0	14	14	14	10.192	86	86	0.0058754	1.5729						By MS/MS		0	0
P14866	P14866	15	15	15	Heterogeneous nuclear ribonucleoprotein L	HNRNPL	sp|P14866|HNRPL_HUMAN Heterogeneous nuclear ribonucleoprotein L OS=Homo sapiens OX=9606 GN=HNRNPL PE=1 SV=2	1	15	15	15	7	0	8	8	9	15	4	7	0	8	8	9	15	4	7	0	8	8	9	15	4	37.5	37.5	37.5	64.132	589	589	0	63.186	By MS/MS		By MS/MS	By MS/MS	By MS/MS	By MS/MS	By MS/MS	17.3	0
P14868	P14868	12	12	12	Aspartate--tRNA ligase, cytoplasmic	DARS	sp|P14868|SYDC_HUMAN Aspartate--tRNA ligase, cytoplasmic OS=Homo sapiens OX=9606 GN=DARS PE=1 SV=2	1	12	12	12	4	0	1	2	7	11	1	4	0	1	2	7	11	1	4	0	1	2	7	11	1	27.7	27.7	27.7	57.136	501	501	0	28.3	By MS/MS		By matching	By matching	By MS/MS	By MS/MS	By matching	9	0
P14923	P14923	10	10	8	Junction plakoglobin	JUP	sp|P14923|PLAK_HUMAN Junction plakoglobin OS=Homo sapiens OX=9606 GN=JUP PE=1 SV=3	1	10	10	8	6	0	0	0	2	6	0	6	0	0	0	2	6	0	5	0	0	0	2	5	0	18.3	18.3	15.6	81.744	745	745	0	21.949	By MS/MS				By matching	By MS/MS		11.9	0
P14927	P14927	3	3	3	Cytochrome b-c1 complex subunit 7	UQCRB	sp|P14927|QCR7_HUMAN Cytochrome b-c1 complex subunit 7 OS=Homo sapiens OX=9606 GN=UQCRB PE=1 SV=2	1	3	3	3	1	0	0	0	1	3	0	1	0	0	0	1	3	0	1	0	0	0	1	3	0	27.9	27.9	27.9	13.53	111	111	0	3.8854	By MS/MS				By matching	By MS/MS		7.2	0
P15121;C9JRZ8	P15121	12;1	12;1	12;1	Aldose reductase	AKR1B1	sp|P15121|ALDR_HUMAN Aldose reductase OS=Homo sapiens OX=9606 GN=AKR1B1 PE=1 SV=3	2	12	12	12	7	0	4	3	10	12	6	7	0	4	3	10	12	6	7	0	4	3	10	12	6	51.3	51.3	51.3	35.853	316	316;316	0	108.97	By MS/MS		By matching	By matching	By MS/MS	By MS/MS	By MS/MS	27.2	0
P15170;Q8IYD1	P15170;Q8IYD1	14;8	14;8	14;8	Eukaryotic peptide chain release factor GTP-binding subunit ERF3A;Eukaryotic peptide chain release factor GTP-binding subunit ERF3B	GSPT1;GSPT2	sp|P15170|ERF3A_HUMAN Eukaryotic peptide chain release factor GTP-binding subunit ERF3A OS=Homo sapiens OX=9606 GN=GSPT1 PE=1 SV=1;sp|Q8IYD1|ERF3B_HUMAN Eukaryotic peptide chain release factor GTP-binding subunit ERF3B OS=Homo sapiens OX=9606 GN=GSPT2 PE=1	2	14	14	14	11	0	2	2	7	12	3	11	0	2	2	7	12	3	11	0	2	2	7	12	3	29.5	29.5	29.5	55.755	499	499;628	0	31.518	By MS/MS		By matching	By matching	By MS/MS	By MS/MS	By MS/MS	26.3	0
P15311	P15311	27	15	14	Ezrin	EZR	sp|P15311|EZRI_HUMAN Ezrin OS=Homo sapiens OX=9606 GN=EZR PE=1 SV=4	1	27	15	14	21	0	14	15	17	24	14	9	0	5	6	6	14	7	8	0	5	5	5	13	6	35.8	21.8	20.5	69.412	586	586	0	130.98	By MS/MS		By MS/MS	By MS/MS	By MS/MS	By MS/MS	By MS/MS	29.4	0
P15328	P15328	5	5	5	Folate receptor alpha	FOLR1	sp|P15328|FOLR1_HUMAN Folate receptor alpha OS=Homo sapiens OX=9606 GN=FOLR1 PE=1 SV=3	1	5	5	5	3	0	1	1	2	5	0	3	0	1	1	2	5	0	3	0	1	1	2	5	0	19.1	19.1	19.1	29.819	257	257	0	10.274	By MS/MS		By matching	By matching	By matching	By MS/MS		9.3	0
P15374	P15374	1	1	1	Ubiquitin carboxyl-terminal hydrolase isozyme L3	UCHL3	sp|P15374|UCHL3_HUMAN Ubiquitin carboxyl-terminal hydrolase isozyme L3 OS=Homo sapiens OX=9606 GN=UCHL3 PE=1 SV=1	1	1	1	1	0	0	0	0	0	1	0	0	0	0	0	0	1	0	0	0	0	0	0	1	0	3.9	3.9	3.9	26.182	230	230	0.00065746	2.5821						By MS/MS		0	0
P15531	P15531	10	4	4	Nucleoside diphosphate kinase A	NME1	sp|P15531|NDKA_HUMAN Nucleoside diphosphate kinase A OS=Homo sapiens OX=9606 GN=NME1 PE=1 SV=1	1	10	4	4	9	0	7	5	9	9	5	4	0	3	1	4	4	2	4	0	3	1	4	4	2	57.9	27	27	17.149	152	152	0	35.947	By MS/MS		By MS/MS	By MS/MS	By MS/MS	By MS/MS	By MS/MS	57.9	0
P15559	P15559	9	9	9	NAD(P)H dehydrogenase [quinone] 1	NQO1	sp|P15559|NQO1_HUMAN NAD(P)H dehydrogenase [quinone] 1 OS=Homo sapiens OX=9606 GN=NQO1 PE=1 SV=1	1	9	9	9	8	0	5	5	8	9	5	8	0	5	5	8	9	5	8	0	5	5	8	9	5	28.8	28.8	28.8	30.867	274	274	0	30.927	By MS/MS		By MS/MS	By MS/MS	By MS/MS	By MS/MS	By MS/MS	25.5	0
P15880	P15880	11	11	11	40S ribosomal protein S2	RPS2	sp|P15880|RS2_HUMAN 40S ribosomal protein S2 OS=Homo sapiens OX=9606 GN=RPS2 PE=1 SV=2	1	11	11	11	9	2	7	7	8	11	6	9	2	7	7	8	11	6	9	2	7	7	8	11	6	34.8	34.8	34.8	31.324	293	293	0	27.69	By MS/MS	By matching	By MS/MS	By MS/MS	By MS/MS	By MS/MS	By MS/MS	28.7	4.8
P15924	P15924	2	2	2	Desmoplakin	DSP	sp|P15924|DESP_HUMAN Desmoplakin OS=Homo sapiens OX=9606 GN=DSP PE=1 SV=3	1	2	2	2	1	0	0	0	0	2	0	1	0	0	0	0	2	0	1	0	0	0	0	2	0	0.6	0.6	0.6	331.77	2871	2871	0.0075145	1.4334	By matching					By MS/MS		0.3	0
P15927	P15927	1	1	1	Replication protein A 32 kDa subunit	RPA2	sp|P15927|RFA2_HUMAN Replication protein A 32 kDa subunit OS=Homo sapiens OX=9606 GN=RPA2 PE=1 SV=1	1	1	1	1	1	0	1	1	1	1	0	1	0	1	1	1	1	0	1	0	1	1	1	1	0	5.2	5.2	5.2	29.247	270	270	0	6.258	By MS/MS		By matching	By matching	By MS/MS	By MS/MS		5.2	0
P16070	P16070	10	10	10	CD44 antigen	CD44	sp|P16070|CD44_HUMAN CD44 antigen OS=Homo sapiens OX=9606 GN=CD44 PE=1 SV=3	1	10	10	10	8	0	8	6	7	8	6	8	0	8	6	7	8	6	8	0	8	6	7	8	6	13.2	13.2	13.2	81.537	742	742	0	62.527	By MS/MS		By MS/MS	By MS/MS	By MS/MS	By MS/MS	By MS/MS	9.6	0
P16104;Q96QV6;Q8IUE6	P16104;Q96QV6;Q8IUE6	5;4;3	5;4;3	1;1;1	Histone H2AX;Histone H2A type 1-A;Histone H2A type 2-B	H2AFX;HIST1H2AA;HIST2H2AB	sp|P16104|H2AX_HUMAN Histone H2AX OS=Homo sapiens OX=9606 GN=H2AFX PE=1 SV=2;sp|Q96QV6|H2A1A_HUMAN Histone H2A type 1-A OS=Homo sapiens OX=9606 GN=HIST1H2AA PE=1 SV=3;sp|Q8IUE6|H2A2B_HUMAN Histone H2A type 2-B OS=Homo sapiens OX=9606 GN=HIST2H2AB PE=1 SV=3	3	5	5	1	4	0	3	3	3	3	2	4	0	3	3	3	3	2	1	0	0	0	0	0	0	52.4	52.4	16.1	15.144	143	143;131;130	0	100.12	By MS/MS		By MS/MS	By MS/MS	By MS/MS	By MS/MS	By MS/MS	32.2	0
P16152	P16152	11	11	9	Carbonyl reductase [NADPH] 1	CBR1	sp|P16152|CBR1_HUMAN Carbonyl reductase [NADPH] 1 OS=Homo sapiens OX=9606 GN=CBR1 PE=1 SV=3	1	11	11	9	10	0	4	3	7	6	1	10	0	4	3	7	6	1	8	0	4	3	6	5	1	52.7	52.7	42.2	30.375	277	277	0	72.311	By MS/MS		By matching	By matching	By MS/MS	By MS/MS	By matching	50.2	0
P18846;P16220	P18846;P16220	1;1	1;1	1;1	Cyclic AMP-dependent transcription factor ATF-1;Cyclic AMP-responsive element-binding protein 1	ATF1;CREB1	sp|P18846|ATF1_HUMAN Cyclic AMP-dependent transcription factor ATF-1 OS=Homo sapiens OX=9606 GN=ATF1 PE=1 SV=2;sp|P16220|CREB1_HUMAN Cyclic AMP-responsive element-binding protein 1 OS=Homo sapiens OX=9606 GN=CREB1 PE=1 SV=2	2	1	1	1	0	0	0	0	0	1	0	0	0	0	0	0	1	0	0	0	0	0	0	1	0	3.3	3.3	3.3	29.232	271	271;341	0.0080183	1.3843						By MS/MS		0	0
P16401	P16401	9	9	9	Histone H1.5	HIST1H1B	sp|P16401|H15_HUMAN Histone H1.5 OS=Homo sapiens OX=9606 GN=HIST1H1B PE=1 SV=3	1	9	9	9	6	0	5	6	5	6	2	6	0	5	6	5	6	2	6	0	5	6	5	6	2	23.5	23.5	23.5	22.58	226	226	0	28.475	By MS/MS		By MS/MS	By MS/MS	By MS/MS	By MS/MS	By MS/MS	23.5	0
P16402	P16402	9	1	1	Histone H1.3	HIST1H1D	sp|P16402|H13_HUMAN Histone H1.3 OS=Homo sapiens OX=9606 GN=HIST1H1D PE=1 SV=2	1	9	1	1	8	0	7	8	7	5	3	1	0	0	0	0	1	0	1	0	0	0	0	1	0	24	7.2	7.2	22.35	221	221	0.0042502	1.8099	By MS/MS		By matching	By matching	By matching	By MS/MS	By matching	24	0
P16403;P22492	P16403	10;2	10;2	3;0	Histone H1.2	HIST1H1C	sp|P16403|H12_HUMAN Histone H1.2 OS=Homo sapiens OX=9606 GN=HIST1H1C PE=1 SV=2	2	10	10	3	9	0	8	9	9	5	4	9	0	8	9	9	5	4	3	0	2	2	2	1	1	26.8	26.8	9.9	21.364	213	213;207	0	55.502	By MS/MS		By MS/MS	By MS/MS	By MS/MS	By MS/MS	By MS/MS	26.8	0
P16435	P16435	2	2	2	NADPH--cytochrome P450 reductase	POR	sp|P16435|NCPR_HUMAN NADPH--cytochrome P450 reductase OS=Homo sapiens OX=9606 GN=POR PE=1 SV=2	1	2	2	2	1	0	0	0	1	2	0	1	0	0	0	1	2	0	1	0	0	0	1	2	0	2.7	2.7	2.7	76.689	677	677	0	5.6482	By matching				By matching	By MS/MS		1.3	0
P16615;Q93084;O14983	P16615	8;2;1	8;2;1	8;2;1	Sarcoplasmic/endoplasmic reticulum calcium ATPase 2	ATP2A2	sp|P16615|AT2A2_HUMAN Sarcoplasmic/endoplasmic reticulum calcium ATPase 2 OS=Homo sapiens OX=9606 GN=ATP2A2 PE=1 SV=1	3	8	8	8	4	0	0	0	4	7	0	4	0	0	0	4	7	0	4	0	0	0	4	7	0	9.5	9.5	9.5	114.76	1042	1042;1043;1001	0	24.115	By MS/MS				By matching	By MS/MS		5.2	0
P16949	P16949	9	9	5	Stathmin	STMN1	sp|P16949|STMN1_HUMAN Stathmin OS=Homo sapiens OX=9606 GN=STMN1 PE=1 SV=3	1	9	9	5	5	0	2	1	4	7	3	5	0	2	1	4	7	3	3	0	2	1	2	3	2	47.7	47.7	35.6	17.302	149	149	0	44.217	By MS/MS		By matching	By matching	By MS/MS	By MS/MS	By MS/MS	29.5	0
P16989	P16989	8	4	4	Y-box-binding protein 3	YBX3	sp|P16989|YBOX3_HUMAN Y-box-binding protein 3 OS=Homo sapiens OX=9606 GN=YBX3 PE=1 SV=4	1	8	4	4	6	0	4	5	5	8	3	3	0	1	2	2	4	0	3	0	1	2	2	4	0	29.6	19.6	19.6	40.089	372	372	0	53.382	By MS/MS		By matching	By MS/MS	By matching	By MS/MS	By matching	18	0
P17066;P48741	P17066;P48741	11;6	1;1	1;1	Heat shock 70 kDa protein 6;Putative heat shock 70 kDa protein 7	HSPA6;HSPA7	sp|P17066|HSP76_HUMAN Heat shock 70 kDa protein 6 OS=Homo sapiens OX=9606 GN=HSPA6 PE=1 SV=2;sp|P48741|HSP77_HUMAN Putative heat shock 70 kDa protein 7 OS=Homo sapiens OX=9606 GN=HSPA7 PE=5 SV=2	2	11	1	1	9	0	8	8	8	8	8	1	0	1	1	1	1	1	1	0	1	1	1	1	1	15.7	1.7	1.7	71.027	643	643;367	0	27.824	By MS/MS		By MS/MS	By MS/MS	By MS/MS	By MS/MS	By MS/MS	14.3	0
P17096	P17096	3	3	3	High mobility group protein HMG-I/HMG-Y	HMGA1	sp|P17096|HMGA1_HUMAN High mobility group protein HMG-I/HMG-Y OS=Homo sapiens OX=9606 GN=HMGA1 PE=1 SV=3	1	3	3	3	2	0	2	2	3	3	1	2	0	2	2	3	3	1	2	0	2	2	3	3	1	23.4	23.4	23.4	11.676	107	107	0	13.491	By MS/MS		By MS/MS	By MS/MS	By MS/MS	By MS/MS	By MS/MS	23.4	0
P17174	P17174	2	2	2	Aspartate aminotransferase, cytoplasmic	GOT1	sp|P17174|AATC_HUMAN Aspartate aminotransferase, cytoplasmic OS=Homo sapiens OX=9606 GN=GOT1 PE=1 SV=3	1	2	2	2	2	0	0	0	0	0	0	2	0	0	0	0	0	0	2	0	0	0	0	0	0	5.6	5.6	5.6	46.247	413	413	0.00064977	2.4584	By MS/MS							5.6	0
P17252	P17252	1	1	1	Protein kinase C alpha type	PRKCA	sp|P17252|KPCA_HUMAN Protein kinase C alpha type OS=Homo sapiens OX=9606 GN=PRKCA PE=1 SV=4	1	1	1	1	0	0	0	0	0	1	0	0	0	0	0	0	1	0	0	0	0	0	0	1	0	2.7	2.7	2.7	76.749	672	672	0.0053223	1.6168						By MS/MS		0	0
P22694;P22612;P17612	P22694;P22612;P17612	1;1;1	1;1;1	1;1;1	cAMP-dependent protein kinase catalytic subunit beta;cAMP-dependent protein kinase catalytic subunit gamma;cAMP-dependent protein kinase catalytic subunit alpha	PRKACB;PRKACG;PRKACA	sp|P22694|KAPCB_HUMAN cAMP-dependent protein kinase catalytic subunit beta OS=Homo sapiens OX=9606 GN=PRKACB PE=1 SV=2;sp|P22612|KAPCG_HUMAN cAMP-dependent protein kinase catalytic subunit gamma OS=Homo sapiens OX=9606 GN=PRKACG PE=1 SV=3;sp|P17612|KAPCA_H	3	1	1	1	1	0	0	0	0	0	0	1	0	0	0	0	0	0	1	0	0	0	0	0	0	2.6	2.6	2.6	40.622	351	351;351;351	0.0058617	1.5392	By MS/MS							2.6	0
P17655	P17655	8	8	8	Calpain-2 catalytic subunit	CAPN2	sp|P17655|CAN2_HUMAN Calpain-2 catalytic subunit OS=Homo sapiens OX=9606 GN=CAPN2 PE=1 SV=6	1	8	8	8	4	0	2	1	2	7	1	4	0	2	1	2	7	1	4	0	2	1	2	7	1	9.7	9.7	9.7	79.994	700	700	0	25.601	By MS/MS		By matching	By matching	By MS/MS	By MS/MS	By matching	5	0
P17812;Q9NRF8	P17812	19;2	19;2	19;2	CTP synthase 1	CTPS1	sp|P17812|PYRG1_HUMAN CTP synthase 1 OS=Homo sapiens OX=9606 GN=CTPS1 PE=1 SV=2	2	19	19	19	10	0	2	2	7	12	4	10	0	2	2	7	12	4	10	0	2	2	7	12	4	38.4	38.4	38.4	66.69	591	591;586	0	50.96	By MS/MS		By matching	By matching	By MS/MS	By MS/MS	By matching	24	0
P17813	P17813	1	1	1	Endoglin	ENG	sp|P17813|EGLN_HUMAN Endoglin OS=Homo sapiens OX=9606 GN=ENG PE=1 SV=2	1	1	1	1	0	0	0	0	0	1	0	0	0	0	0	0	1	0	0	0	0	0	0	1	0	1.8	1.8	1.8	70.577	658	658	0.007467	1.3977						By MS/MS		0	0
P17844	P17844	25	25	17	Probable ATP-dependent RNA helicase DDX5	DDX5	sp|P17844|DDX5_HUMAN Probable ATP-dependent RNA helicase DDX5 OS=Homo sapiens OX=9606 GN=DDX5 PE=1 SV=1	1	25	25	17	16	0	13	12	12	21	8	16	0	13	12	12	21	8	10	0	8	7	8	15	6	39.7	39.7	27.5	69.147	614	614	0	177.31	By MS/MS		By MS/MS	By MS/MS	By MS/MS	By MS/MS	By MS/MS	27.5	0
P17858	P17858	5	2	2	ATP-dependent 6-phosphofructokinase, liver type	PFKL	sp|P17858|PFKAL_HUMAN ATP-dependent 6-phosphofructokinase, liver type OS=Homo sapiens OX=9606 GN=PFKL PE=1 SV=6	1	5	2	2	3	0	1	0	1	4	1	1	0	0	0	1	2	0	1	0	0	0	1	2	0	7.8	3.5	3.5	85.018	780	780	0.00063939	2.3012	By matching		By matching		By matching	By MS/MS	By matching	3.1	0
P17931	P17931	7	7	7	Galectin-3	LGALS3	sp|P17931|LEG3_HUMAN Galectin-3 OS=Homo sapiens OX=9606 GN=LGALS3 PE=1 SV=5	1	7	7	7	5	0	3	4	5	6	2	5	0	3	4	5	6	2	5	0	3	4	5	6	2	28	28	28	26.152	250	250	0	32.868	By MS/MS		By matching	By matching	By MS/MS	By MS/MS	By MS/MS	22.4	0
P17980	P17980	4	4	4	26S protease regulatory subunit 6A	PSMC3	sp|P17980|PRS6A_HUMAN 26S proteasome regulatory subunit 6A OS=Homo sapiens OX=9606 GN=PSMC3 PE=1 SV=3	1	4	4	4	4	0	1	1	2	2	0	4	0	1	1	2	2	0	4	0	1	1	2	2	0	12.3	12.3	12.3	49.203	439	439	0	17.972	By MS/MS		By matching	By matching	By matching	By MS/MS		12.3	0
P17987	P17987	23	23	23	T-complex protein 1 subunit alpha	TCP1	sp|P17987|TCPA_HUMAN T-complex protein 1 subunit alpha OS=Homo sapiens OX=9606 GN=TCP1 PE=1 SV=1	1	23	23	23	22	0	8	10	15	17	8	22	0	8	10	15	17	8	22	0	8	10	15	17	8	44.8	44.8	44.8	60.343	556	556	0	105.33	By MS/MS		By matching	By matching	By MS/MS	By MS/MS	By MS/MS	42.6	0
P18077	P18077	7	7	7	60S ribosomal protein L35a	RPL35A	sp|P18077|RL35A_HUMAN 60S ribosomal protein L35a OS=Homo sapiens OX=9606 GN=RPL35A PE=1 SV=2	1	7	7	7	1	0	1	0	2	7	1	1	0	1	0	2	7	1	1	0	1	0	2	7	1	45.5	45.5	45.5	12.538	110	110	0	10.62	By MS/MS		By matching		By MS/MS	By MS/MS	By MS/MS	6.4	0
P18085	P18085	6	2	2	ADP-ribosylation factor 4	ARF4	sp|P18085|ARF4_HUMAN ADP-ribosylation factor 4 OS=Homo sapiens OX=9606 GN=ARF4 PE=1 SV=3	1	6	2	2	6	0	0	3	6	5	4	2	0	0	2	2	2	2	2	0	0	2	2	2	2	38.3	9.4	9.4	20.511	180	180	0	4.7468	By MS/MS			By matching	By MS/MS	By MS/MS	By MS/MS	38.3	0
P18124	P18124	17	17	17	60S ribosomal protein L7	RPL7	sp|P18124|RL7_HUMAN 60S ribosomal protein L7 OS=Homo sapiens OX=9606 GN=RPL7 PE=1 SV=1	1	17	17	17	15	0	9	4	10	11	7	15	0	9	4	10	11	7	15	0	9	4	10	11	7	44.8	44.8	44.8	29.225	248	248	0	65.283	By MS/MS		By MS/MS	By MS/MS	By MS/MS	By MS/MS	By MS/MS	41.5	0
P18206	P18206	47	47	47	Vinculin	VCL	sp|P18206|VINC_HUMAN Vinculin OS=Homo sapiens OX=9606 GN=VCL PE=1 SV=4	1	47	47	47	26	0	13	13	24	42	21	26	0	13	13	24	42	21	26	0	13	13	24	42	21	42.6	42.6	42.6	123.8	1134	1134	0	224.43	By MS/MS		By MS/MS	By MS/MS	By MS/MS	By MS/MS	By MS/MS	24.3	0
P30685;P30498;P30491;P30490;P18464;P30495;P30484;P30464;P10319;P18465;Q95365;Q29836;Q29718;P30475;P03989;P01889;Q04826;P30488;P30487;P30485;P30483;P30481;P30461;Q31610;P30486;P04222	P30685;P30498;P30491;P30490;P18464;P30495;P30484;P30464;P10319;P18465;Q95365;Q29836;Q29718;P30475;P03989;P01889;Q04826;P30488;P30487;P30485;P30483;P30481;P30461;Q31610;P30486	7;7;7;7;7;6;6;6;6;5;5;5;5;5;5;5;4;4;4;4;4;4;4;4;4;3	4;4;4;4;4;3;3;3;4;3;3;3;3;3;3;3;2;2;2;2;2;2;2;2;2;3	0;0;0;0;0;0;0;0;0;0;0;0;0;0;0;0;0;0;0;0;0;0;0;0;0;0	HLA class I histocompatibility antigen, B-35 alpha chain;HLA class I histocompatibility antigen, B-78 alpha chain;HLA class I histocompatibility antigen, B-53 alpha chain;HLA class I histocompatibility antigen, B-52 alpha chain;HLA class I histocompatibility antigen, B-51 alpha chain;HLA class I histocompatibility antigen, B-56 alpha chain;HLA class I histocompatibility antigen, B-46 alpha chain;…	HLA-B	sp|P30685|1B35_HUMAN HLA class I histocompatibility antigen, B-35 alpha chain OS=Homo sapiens OX=9606 GN=HLA-B PE=1 SV=1;sp|P30498|1B78_HUMAN HLA class I histocompatibility antigen, B-78 alpha chain OS=Homo sapiens OX=9606 GN=HLA-B PE=1 SV=1;sp|P30491|1B53	26	7	4	0	4	0	1	1	2	6	0	2	0	0	0	0	4	0	0	0	0	0	0	0	0	28.5	16	0	40.455	362	362;362;362;362;362;362;362;362;362;362;362;362;362;362;362;362;362;362;362;362;362;362;362;362;362;366	0	41.859	By MS/MS		By matching	By matching	By matching	By MS/MS		15.5	0
P18564	P18564	1	1	1	Integrin beta-6	ITGB6	sp|P18564|ITB6_HUMAN Integrin beta-6 OS=Homo sapiens OX=9606 GN=ITGB6 PE=1 SV=2	1	1	1	1	1	0	0	0	0	1	1	1	0	0	0	0	1	1	1	0	0	0	0	1	1	1.1	1.1	1.1	85.935	788	788	0.0018564	1.9885	By MS/MS					By MS/MS	By matching	1.1	0
P18583	P18583	2	2	2	Protein SON	SON	sp|P18583|SON_HUMAN Protein SON OS=Homo sapiens OX=9606 GN=SON PE=1 SV=4	1	2	2	2	0	0	0	0	0	2	0	0	0	0	0	0	2	0	0	0	0	0	0	2	0	1.2	1.2	1.2	263.83	2426	2426	0.00066401	2.6728						By MS/MS		0	0
P18621	P18621	9	9	9	60S ribosomal protein L17	RPL17	sp|P18621|RL17_HUMAN 60S ribosomal protein L17 OS=Homo sapiens OX=9606 GN=RPL17 PE=1 SV=3	1	9	9	9	6	0	4	5	5	8	5	6	0	4	5	5	8	5	6	0	4	5	5	8	5	41.3	41.3	41.3	21.397	184	184	0	32.929	By MS/MS		By MS/MS	By matching	By MS/MS	By MS/MS	By MS/MS	28.8	0
P18669;P15259;Q8N0Y7	P18669	13;5;4	13;5;4	13;5;4	Phosphoglycerate mutase 1	PGAM1	sp|P18669|PGAM1_HUMAN Phosphoglycerate mutase 1 OS=Homo sapiens OX=9606 GN=PGAM1 PE=1 SV=2	3	13	13	13	11	0	5	5	9	10	7	11	0	5	5	9	10	7	11	0	5	5	9	10	7	69.7	69.7	69.7	28.804	254	254;253;254	0	154.04	By MS/MS		By MS/MS	By MS/MS	By MS/MS	By MS/MS	By MS/MS	62.2	0
P18754	P18754	4	4	4	Regulator of chromosome condensation	RCC1	sp|P18754|RCC1_HUMAN Regulator of chromosome condensation OS=Homo sapiens OX=9606 GN=RCC1 PE=1 SV=1	1	4	4	4	1	0	1	1	0	4	0	1	0	1	1	0	4	0	1	0	1	1	0	4	0	15	15	15	44.969	421	421	0	10.546	By MS/MS		By matching	By matching		By MS/MS		2.4	0
P18859	P18859	3	3	3	ATP synthase-coupling factor 6, mitochondrial	ATP5J	sp|P18859|ATP5J_HUMAN ATP synthase-coupling factor 6, mitochondrial OS=Homo sapiens OX=9606 GN=ATP5PF PE=1 SV=1	1	3	3	3	0	0	0	1	0	2	0	0	0	0	1	0	2	0	0	0	0	1	0	2	0	26.9	26.9	26.9	12.587	108	108	0	11.847				By MS/MS		By MS/MS		0	0
P19022	P19022	1	1	1	Cadherin-2	CDH2	sp|P19022|CADH2_HUMAN Cadherin-2 OS=Homo sapiens OX=9606 GN=CDH2 PE=1 SV=4	1	1	1	1	1	0	0	1	1	1	1	1	0	0	1	1	1	1	1	0	0	1	1	1	1	2	2	2	99.808	906	906	0	13.334	By MS/MS			By matching	By MS/MS	By matching	By matching	2	0
P19338	P19338	25	25	25	Nucleolin	NCL	sp|P19338|NUCL_HUMAN Nucleolin OS=Homo sapiens OX=9606 GN=NCL PE=1 SV=3	1	25	25	25	19	1	17	15	17	20	14	19	1	17	15	17	20	14	19	1	17	15	17	20	14	36.3	36.3	36.3	76.613	710	710	0	149.03	By MS/MS	By matching	By MS/MS	By MS/MS	By MS/MS	By MS/MS	By MS/MS	28.6	1.1
P19367;Q2TB90	P19367	11;2	11;2	11;2	Hexokinase-1	HK1	sp|P19367|HXK1_HUMAN Hexokinase-1 OS=Homo sapiens OX=9606 GN=HK1 PE=1 SV=3	2	11	11	11	2	0	0	0	2	10	0	2	0	0	0	2	10	0	2	0	0	0	2	10	0	12.3	12.3	12.3	102.48	917	917;917	0	17.778	By MS/MS				By MS/MS	By MS/MS		2.4	0
P19623	P19623	4	4	4	Spermidine synthase	SRM	sp|P19623|SPEE_HUMAN Spermidine synthase OS=Homo sapiens OX=9606 GN=SRM PE=1 SV=1	1	4	4	4	4	0	2	2	3	3	0	4	0	2	2	3	3	0	4	0	2	2	3	3	0	16.9	16.9	16.9	33.824	302	302	0	14.926	By MS/MS		By matching	By matching	By MS/MS	By MS/MS		16.9	0
P19784;P12532;P17540	P19784;P12532;P17540	2;1;1	1;0;0	1;0;0	Casein kinase II subunit alpha;Creatine kinase U-type, mitochondrial;Creatine kinase S-type, mitochondrial	CSNK2A2;CKMT1A;CKMT2	sp|P19784|CSK22_HUMAN Casein kinase II subunit alpha OS=Homo sapiens OX=9606 GN=CSNK2A2 PE=1 SV=1;sp|P12532|KCRU_HUMAN Creatine kinase U-type, mitochondrial OS=Homo sapiens OX=9606 GN=CKMT1A PE=1 SV=1;sp|P17540|KCRS_HUMAN Creatine kinase S-type, mitochond	3	2	1	1	0	0	0	0	0	2	0	0	0	0	0	0	1	0	0	0	0	0	0	1	0	4.9	3.1	3.1	41.213	350	350;417;419	0.00064641	2.4178						By MS/MS		0	0
P20020;P23634;Q16720;Q01814	P20020;P23634	3;3;1;1	3;3;1;1	3;3;1;1	Plasma membrane calcium-transporting ATPase 1;Plasma membrane calcium-transporting ATPase 4	ATP2B1;ATP2B4	sp|P20020|AT2B1_HUMAN Plasma membrane calcium-transporting ATPase 1 OS=Homo sapiens OX=9606 GN=ATP2B1 PE=1 SV=4;sp|P23634|AT2B4_HUMAN Plasma membrane calcium-transporting ATPase 4 OS=Homo sapiens OX=9606 GN=ATP2B4 PE=1 SV=2	4	3	3	3	1	0	1	0	1	3	0	1	0	1	0	1	3	0	1	0	1	0	1	3	0	2.1	2.1	2.1	134.68	1220	1220;1241;1220;1243	0	4.2058	By MS/MS		By matching		By matching	By MS/MS		1.1	0
P20042	P20042	7	7	7	Eukaryotic translation initiation factor 2 subunit 2	EIF2S2	sp|P20042|IF2B_HUMAN Eukaryotic translation initiation factor 2 subunit 2 OS=Homo sapiens OX=9606 GN=EIF2S2 PE=1 SV=2	1	7	7	7	3	0	1	1	1	6	2	3	0	1	1	1	6	2	3	0	1	1	1	6	2	19.8	19.8	19.8	38.388	333	333	0	38.763	By MS/MS		By matching	By matching	By matching	By MS/MS	By matching	8.4	0
P20073	P20073	5	5	5	Annexin A7	ANXA7	sp|P20073|ANXA7_HUMAN Annexin A7 OS=Homo sapiens OX=9606 GN=ANXA7 PE=1 SV=3	1	5	5	5	0	1	0	0	0	5	1	0	1	0	0	0	5	1	0	1	0	0	0	5	1	11.1	11.1	11.1	52.739	488	488	0	10.884		By matching				By MS/MS	By matching	0	1.8
P20248	P20248	1	1	1	Cyclin-A2	CCNA2	sp|P20248|CCNA2_HUMAN Cyclin-A2 OS=Homo sapiens OX=9606 GN=CCNA2 PE=1 SV=2	1	1	1	1	0	0	0	0	0	1	0	0	0	0	0	0	1	0	0	0	0	0	0	1	0	2.3	2.3	2.3	48.55	432	432	0.0074971	1.4136						By MS/MS		0	0
P20290	P20290	5	5	5	Transcription factor BTF3	BTF3	sp|P20290|BTF3_HUMAN Transcription factor BTF3 OS=Homo sapiens OX=9606 GN=BTF3 PE=1 SV=1	1	5	5	5	4	0	2	2	3	4	1	4	0	2	2	3	4	1	4	0	2	2	3	4	1	41.3	41.3	41.3	22.168	206	206	0	34.647	By MS/MS		By matching	By MS/MS	By MS/MS	By MS/MS	By matching	37.4	0
P20339	P20339	4	2	2	Ras-related protein Rab-5A	RAB5A	sp|P20339|RAB5A_HUMAN Ras-related protein Rab-5A OS=Homo sapiens OX=9606 GN=RAB5A PE=1 SV=2	1	4	2	2	2	0	1	1	2	3	0	1	0	0	0	1	1	0	1	0	0	0	1	1	0	22.8	12.6	12.6	23.658	215	215	0.00066711	2.7108	By MS/MS		By matching	By matching	By matching	By MS/MS		11.6	0
P20340;Q9NRW1;Q53S08;Q14964	P20340;Q9NRW1	4;2;1;1	4;2;1;1	4;2;1;1	Ras-related protein Rab-6A;Ras-related protein Rab-6B	RAB6A;RAB6B	sp|P20340|RAB6A_HUMAN Ras-related protein Rab-6A OS=Homo sapiens OX=9606 GN=RAB6A PE=1 SV=3;sp|Q9NRW1|RAB6B_HUMAN Ras-related protein Rab-6B OS=Homo sapiens OX=9606 GN=RAB6B PE=1 SV=1	4	4	4	4	2	0	1	1	2	3	1	2	0	1	1	2	3	1	2	0	1	1	2	3	1	21.6	21.6	21.6	23.593	208	208;208;254;217	0	12.058	By MS/MS		By MS/MS	By MS/MS	By MS/MS	By MS/MS	By MS/MS	10.6	0
P20618	P20618	6	6	6	Proteasome subunit beta type-1	PSMB1	sp|P20618|PSB1_HUMAN Proteasome subunit beta type-1 OS=Homo sapiens OX=9606 GN=PSMB1 PE=1 SV=2	1	6	6	6	3	0	4	3	4	6	1	3	0	4	3	4	6	1	3	0	4	3	4	6	1	31.1	31.1	31.1	26.489	241	241	0	15.101	By MS/MS		By MS/MS	By MS/MS	By MS/MS	By MS/MS	By matching	14.5	0
P20645	P20645	1	1	1	Cation-dependent mannose-6-phosphate receptor	M6PR	sp|P20645|MPRD_HUMAN Cation-dependent mannose-6-phosphate receptor OS=Homo sapiens OX=9606 GN=M6PR PE=1 SV=1	1	1	1	1	1	0	1	1	1	1	1	1	0	1	1	1	1	1	1	0	1	1	1	1	1	5.1	5.1	5.1	30.993	277	277	0.00066269	2.6589	By MS/MS		By matching	By matching	By matching	By MS/MS	By matching	5.1	0
P20674	P20674	3	3	3	Cytochrome c oxidase subunit 5A, mitochondrial	COX5A	sp|P20674|COX5A_HUMAN Cytochrome c oxidase subunit 5A, mitochondrial OS=Homo sapiens OX=9606 GN=COX5A PE=1 SV=2	1	3	3	3	2	0	1	1	2	3	2	2	0	1	1	2	3	2	2	0	1	1	2	3	2	16	16	16	16.762	150	150	0	6.4594	By MS/MS		By matching	By matching	By MS/MS	By MS/MS	By matching	10.7	0
P20700	P20700	22	20	20	Lamin-B1	LMNB1	sp|P20700|LMNB1_HUMAN Lamin-B1 OS=Homo sapiens OX=9606 GN=LMNB1 PE=1 SV=2	1	22	20	20	18	1	9	7	12	18	2	16	1	9	7	12	16	2	16	1	9	7	12	16	2	35.7	34.1	34.1	66.408	586	586	0	93.617	By MS/MS	By matching	By matching	By matching	By MS/MS	By MS/MS	By matching	29.7	1.4
P20810	P20810	8	8	8	Calpastatin	CAST	sp|P20810|ICAL_HUMAN Calpastatin OS=Homo sapiens OX=9606 GN=CAST PE=1 SV=4	1	8	8	8	4	0	0	2	2	7	1	4	0	0	2	2	7	1	4	0	0	2	2	7	1	14.7	14.7	14.7	76.572	708	708	0	30.328	By MS/MS			By matching	By MS/MS	By MS/MS	By matching	7.2	0
P20839	P20839	3	2	2	Inosine-5-monophosphate dehydrogenase 1	IMPDH1	sp|P20839|IMDH1_HUMAN Inosine-5-monophosphate dehydrogenase 1 OS=Homo sapiens OX=9606 GN=IMPDH1 PE=1 SV=2	1	3	2	2	2	0	1	1	3	2	1	1	0	0	0	2	1	0	1	0	0	0	2	1	0	5.4	3.9	3.9	55.405	514	514	0.00065189	2.4927	By MS/MS		By matching	By matching	By MS/MS	By MS/MS	By matching	3.9	0
P20908	P20908	3	3	3	Collagen alpha-1(V) chain	COL5A1	sp|P20908|CO5A1_HUMAN Collagen alpha-1(V) chain OS=Homo sapiens OX=9606 GN=COL5A1 PE=1 SV=3	1	3	3	3	3	0	0	0	2	0	0	3	0	0	0	2	0	0	3	0	0	0	2	0	0	2.9	2.9	2.9	183.56	1838	1838	0	7.3127	By MS/MS				By MS/MS			2.9	0
P20962	P20962	4	4	4	Parathymosin	PTMS	sp|P20962|PTMS_HUMAN Parathymosin OS=Homo sapiens OX=9606 GN=PTMS PE=1 SV=2	1	4	4	4	1	0	1	1	1	4	1	1	0	1	1	1	4	1	1	0	1	1	1	4	1	23.5	23.5	23.5	11.53	102	102	0	28.347	By MS/MS		By MS/MS	By MS/MS	By MS/MS	By MS/MS	By MS/MS	10.8	0
P21266	P21266	13	13	12	Glutathione S-transferase Mu 3	GSTM3	sp|P21266|GSTM3_HUMAN Glutathione S-transferase Mu 3 OS=Homo sapiens OX=9606 GN=GSTM3 PE=1 SV=3	1	13	13	12	10	0	3	2	9	10	5	10	0	3	2	9	10	5	9	0	2	1	8	9	4	55.6	55.6	51.6	26.559	225	225	0	75.968	By MS/MS		By matching	By matching	By MS/MS	By MS/MS	By MS/MS	45.8	0
P21281	P21281	1	1	1	V-type proton ATPase subunit B, brain isoform	ATP6V1B2	sp|P21281|VATB2_HUMAN V-type proton ATPase subunit B, brain isoform OS=Homo sapiens OX=9606 GN=ATP6V1B2 PE=1 SV=3	1	1	1	1	0	0	0	0	0	1	0	0	0	0	0	0	1	0	0	0	0	0	0	1	0	2.2	2.2	2.2	56.5	511	511	0.004245	1.8048						By MS/MS		0	0
P21291	P21291	10	10	10	Cysteine and glycine-rich protein 1	CSRP1	sp|P21291|CSRP1_HUMAN Cysteine and glycine-rich protein 1 OS=Homo sapiens OX=9606 GN=CSRP1 PE=1 SV=3	1	10	10	10	10	0	8	8	9	10	10	10	0	8	8	9	10	10	10	0	8	8	9	10	10	61.1	61.1	61.1	20.567	193	193	0	160.26	By MS/MS		By MS/MS	By MS/MS	By MS/MS	By MS/MS	By MS/MS	61.1	0
P21333	P21333	127	116	112	Filamin-A	FLNA	sp|P21333|FLNA_HUMAN Filamin-A OS=Homo sapiens OX=9606 GN=FLNA PE=1 SV=4	1	127	116	112	119	2	86	89	107	107	84	110	2	80	84	100	98	78	106	2	77	81	97	94	76	60.5	58	56.9	280.74	2647	2647	0	323.31	By MS/MS	By matching	By MS/MS	By MS/MS	By MS/MS	By MS/MS	By MS/MS	57.9	1.1
P21399	P21399	9	9	9	Cytoplasmic aconitate hydratase	ACO1	sp|P21399|ACOC_HUMAN Cytoplasmic aconitate hydratase OS=Homo sapiens OX=9606 GN=ACO1 PE=1 SV=3	1	9	9	9	4	0	0	0	2	7	2	4	0	0	0	2	7	2	4	0	0	0	2	7	2	12.4	12.4	12.4	98.398	889	889	0	14.7	By MS/MS				By matching	By MS/MS	By matching	7.1	0
P21796	P21796	10	10	10	Voltage-dependent anion-selective channel protein 1	VDAC1	sp|P21796|VDAC1_HUMAN Voltage-dependent anion-selective channel protein 1 OS=Homo sapiens OX=9606 GN=VDAC1 PE=1 SV=2	1	10	10	10	9	0	7	7	9	9	4	9	0	7	7	9	9	4	9	0	7	7	9	9	4	48.4	48.4	48.4	30.772	283	283	0	70.451	By MS/MS		By MS/MS	By MS/MS	By MS/MS	By MS/MS	By MS/MS	44.5	0
P21926	P21926	2	2	2	CD9 antigen	CD9	sp|P21926|CD9_HUMAN CD9 antigen OS=Homo sapiens OX=9606 GN=CD9 PE=1 SV=4	1	2	2	2	2	0	0	0	0	1	0	2	0	0	0	0	1	0	2	0	0	0	0	1	0	15.4	15.4	15.4	25.416	228	228	0	27.242	By MS/MS					By MS/MS		15.4	0
P21964	P21964	1	1	1	Catechol O-methyltransferase	COMT	sp|P21964|COMT_HUMAN Catechol O-methyltransferase OS=Homo sapiens OX=9606 GN=COMT PE=1 SV=2	1	1	1	1	0	0	0	0	0	1	0	0	0	0	0	0	1	0	0	0	0	0	0	1	0	5.5	5.5	5.5	30.037	271	271	0.0012739	2.2633						By MS/MS		0	0
P21980	P21980	5	5	5	Protein-glutamine gamma-glutamyltransferase 2	TGM2	sp|P21980|TGM2_HUMAN Protein-glutamine gamma-glutamyltransferase 2 OS=Homo sapiens OX=9606 GN=TGM2 PE=1 SV=2	1	5	5	5	3	0	0	0	2	3	0	3	0	0	0	2	3	0	3	0	0	0	2	3	0	9.5	9.5	9.5	77.328	687	687	0	20.644	By MS/MS				By matching	By MS/MS		5.5	0
P22061	P22061	4	4	4	Protein-L-isoaspartate(D-aspartate) O-methyltransferase	PCMT1	sp|P22061|PIMT_HUMAN Protein-L-isoaspartate(D-aspartate) O-methyltransferase OS=Homo sapiens OX=9606 GN=PCMT1 PE=1 SV=4	1	4	4	4	4	0	1	1	2	3	1	4	0	1	1	2	3	1	4	0	1	1	2	3	1	18.9	18.9	18.9	24.636	227	227	0	14.811	By MS/MS		By matching	By matching	By matching	By MS/MS	By matching	18.9	0
P22087	P22087	9	9	8	rRNA 2-O-methyltransferase fibrillarin	FBL	sp|P22087|FBRL_HUMAN rRNA 2-O-methyltransferase fibrillarin OS=Homo sapiens OX=9606 GN=FBL PE=1 SV=2	1	9	9	8	4	0	3	2	3	8	1	4	0	3	2	3	8	1	3	0	2	2	2	7	0	30.8	30.8	27.4	33.784	321	321	0	31.758	By MS/MS		By matching	By MS/MS	By MS/MS	By MS/MS	By matching	16.8	0
P22102	P22102	16	16	16	Trifunctional purine biosynthetic protein adenosine-3;Phosphoribosylamine--glycine ligase;Phosphoribosylformylglycinamidine cyclo-ligase;Phosphoribosylglycinamide formyltransferase	GART	sp|P22102|PUR2_HUMAN Trifunctional purine biosynthetic protein adenosine-3 OS=Homo sapiens OX=9606 GN=GART PE=1 SV=1	1	16	16	16	12	0	1	1	6	9	1	12	0	1	1	6	9	1	12	0	1	1	6	9	1	21.7	21.7	21.7	107.77	1010	1010	0	45.855	By MS/MS		By matching	By matching	By matching	By MS/MS	By matching	16.6	0
P22234	P22234	17	17	17	Multifunctional protein ADE2;Phosphoribosylaminoimidazole-succinocarboxamide synthase;Phosphoribosylaminoimidazole carboxylase	PAICS	sp|P22234|PUR6_HUMAN Multifunctional protein ADE2 OS=Homo sapiens OX=9606 GN=PAICS PE=1 SV=3	1	17	17	17	12	0	2	6	12	14	4	12	0	2	6	12	14	4	12	0	2	6	12	14	4	40.9	40.9	40.9	47.079	425	425	0	89.925	By MS/MS		By matching	By matching	By MS/MS	By MS/MS	By matching	28.9	0
P22307	P22307	5	5	5	Non-specific lipid-transfer protein	SCP2	sp|P22307|NLTP_HUMAN Non-specific lipid-transfer protein OS=Homo sapiens OX=9606 GN=SCP2 PE=1 SV=2	1	5	5	5	3	0	2	1	2	4	0	3	0	2	1	2	4	0	3	0	2	1	2	4	0	5.9	5.9	5.9	58.993	547	547	0	12.031	By MS/MS		By matching	By matching	By MS/MS	By MS/MS		5.7	0
P22314	P22314	32	32	32	Ubiquitin-like modifier-activating enzyme 1	UBA1	sp|P22314|UBA1_HUMAN Ubiquitin-like modifier-activating enzyme 1 OS=Homo sapiens OX=9606 GN=UBA1 PE=1 SV=3	1	32	32	32	22	0	10	14	21	27	7	22	0	10	14	21	27	7	22	0	10	14	21	27	7	35.2	35.2	35.2	117.85	1058	1058	0	317.67	By MS/MS		By MS/MS	By MS/MS	By MS/MS	By MS/MS	By MS/MS	26.5	0
P22392;O60361	P22392;O60361	11;7	11;7	5;4	Nucleoside diphosphate kinase B;Putative nucleoside diphosphate kinase	NME2;NME2P1	sp|P22392|NDKB_HUMAN Nucleoside diphosphate kinase B OS=Homo sapiens OX=9606 GN=NME2 PE=1 SV=1;sp|O60361|NDK8_HUMAN Putative nucleoside diphosphate kinase OS=Homo sapiens OX=9606 GN=NME2P1 PE=5 SV=1	2	11	11	5	9	0	7	7	8	9	5	9	0	7	7	8	9	5	4	0	3	3	3	4	2	64.5	64.5	33.6	17.298	152	152;137	0	40.007	By MS/MS		By MS/MS	By MS/MS	By MS/MS	By MS/MS	By MS/MS	59.9	0
P22626	P22626	21	21	20	Heterogeneous nuclear ribonucleoproteins A2/B1	HNRNPA2B1	sp|P22626|ROA2_HUMAN Heterogeneous nuclear ribonucleoproteins A2/B1 OS=Homo sapiens OX=9606 GN=HNRNPA2B1 PE=1 SV=2	1	21	21	20	14	0	13	13	11	20	15	14	0	13	13	11	20	15	14	0	13	13	11	19	14	59.8	59.8	59.8	37.429	353	353	0	262.91	By MS/MS		By MS/MS	By MS/MS	By MS/MS	By MS/MS	By MS/MS	39.7	0
P22695	P22695	8	8	8	Cytochrome b-c1 complex subunit 2, mitochondrial	UQCRC2	sp|P22695|QCR2_HUMAN Cytochrome b-c1 complex subunit 2, mitochondrial OS=Homo sapiens OX=9606 GN=UQCRC2 PE=1 SV=3	1	8	8	8	7	0	3	3	5	7	1	7	0	3	3	5	7	1	7	0	3	3	5	7	1	23.2	23.2	23.2	48.442	453	453	0	43.101	By MS/MS		By matching	By matching	By MS/MS	By MS/MS	By matching	20.3	0
P23193;Q15560	P23193;Q15560	3;2	3;2	3;2	Transcription elongation factor A protein 1;Transcription elongation factor A protein 2	TCEA1;TCEA2	sp|P23193|TCEA1_HUMAN Transcription elongation factor A protein 1 OS=Homo sapiens OX=9606 GN=TCEA1 PE=1 SV=2;sp|Q15560|TCEA2_HUMAN Transcription elongation factor A protein 2 OS=Homo sapiens OX=9606 GN=TCEA2 PE=1 SV=1	2	3	3	3	1	0	0	0	0	3	0	1	0	0	0	0	3	0	1	0	0	0	0	3	0	11.6	11.6	11.6	33.969	301	301;299	0	8.686	By MS/MS					By MS/MS		4	0
P23229	P23229	2	2	2	Integrin alpha-6;Integrin alpha-6 heavy chain;Integrin alpha-6 light chain;Processed integrin alpha-6	ITGA6	sp|P23229|ITA6_HUMAN Integrin alpha-6 OS=Homo sapiens OX=9606 GN=ITGA6 PE=1 SV=5	1	2	2	2	0	0	0	0	0	2	0	0	0	0	0	0	2	0	0	0	0	0	0	2	0	1.8	1.8	1.8	126.6	1130	1130	0	3.2287						By MS/MS		0	0
P23246	P23246	19	19	18	Splicing factor, proline- and glutamine-rich	SFPQ	sp|P23246|SFPQ_HUMAN Splicing factor, proline- and glutamine-rich OS=Homo sapiens OX=9606 GN=SFPQ PE=1 SV=2	1	19	19	18	11	0	11	9	9	14	5	11	0	11	9	9	14	5	10	0	11	9	9	13	4	31.5	31.5	30.4	76.149	707	707	0	83.566	By MS/MS		By MS/MS	By MS/MS	By MS/MS	By MS/MS	By MS/MS	18.1	0
Q9NRH3;P23258	Q9NRH3;P23258	2;2	2;2	2;2	Tubulin gamma-2 chain;Tubulin gamma-1 chain	TUBG2;TUBG1	sp|Q9NRH3|TBG2_HUMAN Tubulin gamma-2 chain OS=Homo sapiens OX=9606 GN=TUBG2 PE=2 SV=1;sp|P23258|TBG1_HUMAN Tubulin gamma-1 chain OS=Homo sapiens OX=9606 GN=TUBG1 PE=1 SV=2	2	2	2	2	1	0	0	0	1	1	0	1	0	0	0	1	1	0	1	0	0	0	1	1	0	4.7	4.7	4.7	51.091	451	451;451	0.00067249	2.8256	By MS/MS				By matching	By MS/MS		2	0
P23284	P23284	13	13	13	Peptidyl-prolyl cis-trans isomerase B	PPIB	sp|P23284|PPIB_HUMAN Peptidyl-prolyl cis-trans isomerase B OS=Homo sapiens OX=9606 GN=PPIB PE=1 SV=2	1	13	13	13	9	0	8	7	9	11	4	9	0	8	7	9	11	4	9	0	8	7	9	11	4	50.5	50.5	50.5	23.742	216	216	0	60.831	By MS/MS		By MS/MS	By MS/MS	By MS/MS	By MS/MS	By MS/MS	37	0
P23381	P23381	5	5	5	Tryptophan--tRNA ligase, cytoplasmic;T1-TrpRS;T2-TrpRS	WARS	sp|P23381|SYWC_HUMAN Tryptophan--tRNA ligase, cytoplasmic OS=Homo sapiens OX=9606 GN=WARS PE=1 SV=2	1	5	5	5	3	0	1	1	2	4	0	3	0	1	1	2	4	0	3	0	1	1	2	4	0	11	11	11	53.165	471	471	0	17.93	By MS/MS		By matching	By matching	By matching	By MS/MS		7.4	0
P23396	P23396	18	18	18	40S ribosomal protein S3	RPS3	sp|P23396|RS3_HUMAN 40S ribosomal protein S3 OS=Homo sapiens OX=9606 GN=RPS3 PE=1 SV=2	1	18	18	18	15	0	8	8	14	15	10	15	0	8	8	14	15	10	15	0	8	8	14	15	10	67.1	67.1	67.1	26.688	243	243	0	89.434	By MS/MS		By MS/MS	By MS/MS	By MS/MS	By MS/MS	By MS/MS	56.8	0
P23526	P23526	17	17	17	Adenosylhomocysteinase	AHCY	sp|P23526|SAHH_HUMAN Adenosylhomocysteinase OS=Homo sapiens OX=9606 GN=AHCY PE=1 SV=4	1	17	17	17	11	0	7	6	8	15	9	11	0	7	6	8	15	9	11	0	7	6	8	15	9	39.1	39.1	39.1	47.716	432	432	0	51.518	By MS/MS		By MS/MS	By MS/MS	By MS/MS	By MS/MS	By MS/MS	25.2	0
P23528	P23528	20	20	16	Cofilin-1	CFL1	sp|P23528|COF1_HUMAN Cofilin-1 OS=Homo sapiens OX=9606 GN=CFL1 PE=1 SV=3	1	20	20	16	16	0	12	11	12	17	10	16	0	12	11	12	17	10	12	0	10	9	10	14	8	74.1	74.1	53.6	18.502	166	166	0	268.85	By MS/MS		By MS/MS	By MS/MS	By MS/MS	By MS/MS	By MS/MS	68.7	0
P23588	P23588	12	12	12	Eukaryotic translation initiation factor 4B	EIF4B	sp|P23588|IF4B_HUMAN Eukaryotic translation initiation factor 4B OS=Homo sapiens OX=9606 GN=EIF4B PE=1 SV=2	1	12	12	12	6	0	1	3	4	10	0	6	0	1	3	4	10	0	6	0	1	3	4	10	0	22.6	22.6	22.6	69.15	611	611	0	107.59	By MS/MS		By matching	By matching	By MS/MS	By MS/MS		9.5	0
P23919	P23919	9	9	9	Thymidylate kinase	DTYMK	sp|P23919|KTHY_HUMAN Thymidylate kinase OS=Homo sapiens OX=9606 GN=DTYMK PE=1 SV=4	1	9	9	9	7	1	1	1	5	7	0	7	1	1	1	5	7	0	7	1	1	1	5	7	0	43.4	43.4	43.4	23.819	212	212	0	24.521	By MS/MS	By matching	By matching	By matching	By matching	By MS/MS		32.1	3.8
P23921	P23921	11	11	11	Ribonucleoside-diphosphate reductase large subunit	RRM1	sp|P23921|RIR1_HUMAN Ribonucleoside-diphosphate reductase large subunit OS=Homo sapiens OX=9606 GN=RRM1 PE=1 SV=1	1	11	11	11	6	0	1	3	4	7	1	6	0	1	3	4	7	1	6	0	1	3	4	7	1	17.8	17.8	17.8	90.069	792	792	0	36.105	By MS/MS		By matching	By matching	By matching	By MS/MS	By matching	9.8	0
P24534	P24534	8	6	6	Elongation factor 1-beta	EEF1B2	sp|P24534|EF1B_HUMAN Elongation factor 1-beta OS=Homo sapiens OX=9606 GN=EEF1B2 PE=1 SV=3	1	8	6	6	7	0	4	4	5	6	4	5	0	3	3	4	5	4	5	0	3	3	4	5	4	46.7	41.3	41.3	24.763	225	225	0	91.653	By MS/MS		By MS/MS	By matching	By MS/MS	By MS/MS	By MS/MS	38.7	0
P24539	P24539	4	4	4	ATP synthase F(0) complex subunit B1, mitochondrial	ATP5F1	sp|P24539|AT5F1_HUMAN ATP synthase F(0) complex subunit B1, mitochondrial OS=Homo sapiens OX=9606 GN=ATP5PB PE=1 SV=2	1	4	4	4	4	0	1	1	4	4	1	4	0	1	1	4	4	1	4	0	1	1	4	4	1	17.2	17.2	17.2	28.908	256	256	0	25.644	By MS/MS		By matching	By matching	By MS/MS	By MS/MS	By matching	17.2	0
P24666	P24666	2	2	2	Low molecular weight phosphotyrosine protein phosphatase	ACP1	sp|P24666|PPAC_HUMAN Low molecular weight phosphotyrosine protein phosphatase OS=Homo sapiens OX=9606 GN=ACP1 PE=1 SV=3	1	2	2	2	2	0	1	2	2	1	1	2	0	1	2	2	1	1	2	0	1	2	2	1	1	12.7	12.7	12.7	18.042	158	158	0	5.0342	By MS/MS		By matching	By matching	By MS/MS	By MS/MS	By matching	12.7	0
P24752	P24752	6	6	6	Acetyl-CoA acetyltransferase, mitochondrial	ACAT1	sp|P24752|THIL_HUMAN Acetyl-CoA acetyltransferase, mitochondrial OS=Homo sapiens OX=9606 GN=ACAT1 PE=1 SV=1	1	6	6	6	4	0	1	3	2	4	0	4	0	1	3	2	4	0	4	0	1	3	2	4	0	17.1	17.1	17.1	45.199	427	427	0	14.99	By MS/MS		By matching	By matching	By matching	By MS/MS		11.9	0
P24844	P24844	6	3	3	Myosin regulatory light polypeptide 9	MYL9	sp|P24844|MYL9_HUMAN Myosin regulatory light polypeptide 9 OS=Homo sapiens OX=9606 GN=MYL9 PE=1 SV=4	1	6	3	3	5	0	2	1	5	5	3	2	0	0	0	2	2	0	2	0	0	0	2	2	0	35.5	18	18	19.827	172	172	0	26.558	By MS/MS		By matching	By matching	By MS/MS	By MS/MS	By matching	35.5	0
P25205	P25205	12	12	12	DNA replication licensing factor MCM3	MCM3	sp|P25205|MCM3_HUMAN DNA replication licensing factor MCM3 OS=Homo sapiens OX=9606 GN=MCM3 PE=1 SV=3	1	12	12	12	7	0	1	2	2	9	0	7	0	1	2	2	9	0	7	0	1	2	2	9	0	14.1	14.1	14.1	90.98	808	808	0	31.988	By MS/MS		By matching	By matching	By MS/MS	By MS/MS		7.8	0
P25398	P25398	6	6	6	40S ribosomal protein S12	RPS12	sp|P25398|RS12_HUMAN 40S ribosomal protein S12 OS=Homo sapiens OX=9606 GN=RPS12 PE=1 SV=3	1	6	6	6	5	0	4	3	4	6	4	5	0	4	3	4	6	4	5	0	4	3	4	6	4	63.6	63.6	63.6	14.515	132	132	0	76.547	By MS/MS		By MS/MS	By MS/MS	By MS/MS	By MS/MS	By MS/MS	50	0
P25685	P25685	5	5	4	DnaJ homolog subfamily B member 1	DNAJB1	sp|P25685|DNJB1_HUMAN DnaJ homolog subfamily B member 1 OS=Homo sapiens OX=9606 GN=DNAJB1 PE=1 SV=4	1	5	5	4	2	0	0	0	0	4	1	2	0	0	0	0	4	1	2	0	0	0	0	3	0	19.4	19.4	15.9	38.044	340	340	0	10.913	By MS/MS					By MS/MS	By matching	8.5	0
P25705	P25705	20	20	20	ATP synthase subunit alpha, mitochondrial	ATP5A1	sp|P25705|ATPA_HUMAN ATP synthase subunit alpha, mitochondrial OS=Homo sapiens OX=9606 GN=ATP5F1A PE=1 SV=1	1	20	20	20	18	0	14	15	17	15	9	18	0	14	15	17	15	9	18	0	14	15	17	15	9	43.4	43.4	43.4	59.75	553	553	0	236.96	By MS/MS		By MS/MS	By MS/MS	By MS/MS	By MS/MS	By MS/MS	40.9	0
P25786	P25786	10	10	10	Proteasome subunit alpha type-1	PSMA1	sp|P25786|PSA1_HUMAN Proteasome subunit alpha type-1 OS=Homo sapiens OX=9606 GN=PSMA1 PE=1 SV=1	1	10	10	10	7	1	3	2	5	7	2	7	1	3	2	5	7	2	7	1	3	2	5	7	2	44.9	44.9	44.9	29.555	263	263	0	41.758	By MS/MS	By matching	By matching	By matching	By MS/MS	By MS/MS	By matching	30.4	2.7
P25787	P25787	8	8	8	Proteasome subunit alpha type-2	PSMA2	sp|P25787|PSA2_HUMAN Proteasome subunit alpha type-2 OS=Homo sapiens OX=9606 GN=PSMA2 PE=1 SV=2	1	8	8	8	6	0	3	3	4	4	0	6	0	3	3	4	4	0	6	0	3	3	4	4	0	40.2	40.2	40.2	25.898	234	234	0	94.353	By MS/MS		By MS/MS	By matching	By MS/MS	By MS/MS		31.2	0
P25788	P25788	8	8	8	Proteasome subunit alpha type-3	PSMA3	sp|P25788|PSA3_HUMAN Proteasome subunit alpha type-3 OS=Homo sapiens OX=9606 GN=PSMA3 PE=1 SV=2	1	8	8	8	3	0	2	1	1	6	1	3	0	2	1	1	6	1	3	0	2	1	1	6	1	33.7	33.7	33.7	28.433	255	255	0	17.428	By MS/MS		By MS/MS	By MS/MS	By MS/MS	By MS/MS	By MS/MS	16.9	0
P25789	P25789	8	8	8	Proteasome subunit alpha type-4	PSMA4	sp|P25789|PSA4_HUMAN Proteasome subunit alpha type-4 OS=Homo sapiens OX=9606 GN=PSMA4 PE=1 SV=1	1	8	8	8	6	0	4	3	5	6	3	6	0	4	3	5	6	3	6	0	4	3	5	6	3	33	33	33	29.483	261	261	0	16.055	By MS/MS		By MS/MS	By MS/MS	By MS/MS	By MS/MS	By matching	22.6	0
P25815	P25815	1	1	1	Protein S100-P	S100P	sp|P25815|S100P_HUMAN Protein S100-P OS=Homo sapiens OX=9606 GN=S100P PE=1 SV=2	1	1	1	1	0	0	0	0	0	1	0	0	0	0	0	0	1	0	0	0	0	0	0	1	0	13.7	13.7	13.7	10.4	95	95	0.00067159	2.814						By MS/MS		0	0
P26006	P26006	7	7	7	Integrin alpha-3;Integrin alpha-3 heavy chain;Integrin alpha-3 light chain	ITGA3	sp|P26006|ITA3_HUMAN Integrin alpha-3 OS=Homo sapiens OX=9606 GN=ITGA3 PE=1 SV=5	1	7	7	7	6	0	2	0	6	6	1	6	0	2	0	6	6	1	6	0	2	0	6	6	1	7.6	7.6	7.6	116.61	1051	1051	0	17.887	By MS/MS		By matching		By MS/MS	By MS/MS	By matching	6.8	0
P26038	P26038	39	39	27	Moesin	MSN	sp|P26038|MOES_HUMAN Moesin OS=Homo sapiens OX=9606 GN=MSN PE=1 SV=3	1	39	39	27	31	0	16	17	30	33	26	31	0	16	17	30	33	26	19	0	7	8	19	23	19	48	48	33.8	67.819	577	577	0	214.97	By MS/MS		By MS/MS	By MS/MS	By MS/MS	By MS/MS	By MS/MS	37.6	0
P26196	P26196	4	4	4	Probable ATP-dependent RNA helicase DDX6	DDX6	sp|P26196|DDX6_HUMAN Probable ATP-dependent RNA helicase DDX6 OS=Homo sapiens OX=9606 GN=DDX6 PE=1 SV=2	1	4	4	4	1	0	0	0	1	3	0	1	0	0	0	1	3	0	1	0	0	0	1	3	0	13.3	13.3	13.3	54.416	483	483	0	6.1724	By MS/MS				By matching	By MS/MS		3.9	0
P26232	P26232	5	1	1	Catenin alpha-2	CTNNA2	sp|P26232|CTNA2_HUMAN Catenin alpha-2 OS=Homo sapiens OX=9606 GN=CTNNA2 PE=1 SV=5	1	5	1	1	5	1	0	0	2	3	1	1	0	0	0	0	0	0	1	0	0	0	0	0	0	7.2	1.9	1.9	105.31	953	953	0	25.822	By MS/MS	By matching			By matching	By matching	By matching	7.2	0.9
P26368	P26368	4	4	4	Splicing factor U2AF 65 kDa subunit	U2AF2	sp|P26368|U2AF2_HUMAN Splicing factor U2AF 65 kDa subunit OS=Homo sapiens OX=9606 GN=U2AF2 PE=1 SV=4	1	4	4	4	2	0	1	1	1	3	0	2	0	1	1	1	3	0	2	0	1	1	1	3	0	11.8	11.8	11.8	53.5	475	475	0	7.4568	By MS/MS		By matching	By matching	By matching	By MS/MS		8.2	0
P26373	P26373	13	13	13	60S ribosomal protein L13	RPL13	sp|P26373|RL13_HUMAN 60S ribosomal protein L13 OS=Homo sapiens OX=9606 GN=RPL13 PE=1 SV=4	1	13	13	13	6	0	6	6	6	13	4	6	0	6	6	6	13	4	6	0	6	6	6	13	4	46.9	46.9	46.9	24.261	211	211	0	84.654	By MS/MS		By MS/MS	By MS/MS	By MS/MS	By MS/MS	By MS/MS	27	0
P26447	P26447	3	3	3	Protein S100-A4	S100A4	sp|P26447|S10A4_HUMAN Protein S100-A4 OS=Homo sapiens OX=9606 GN=S100A4 PE=1 SV=1	1	3	3	3	3	0	2	2	3	3	2	3	0	2	2	3	3	2	3	0	2	2	3	3	2	28.7	28.7	28.7	11.728	101	101	0	26.962	By MS/MS		By MS/MS	By matching	By MS/MS	By MS/MS	By MS/MS	28.7	0
P26583	P26583	5	4	4	High mobility group protein B2	HMGB2	sp|P26583|HMGB2_HUMAN High mobility group protein B2 OS=Homo sapiens OX=9606 GN=HMGB2 PE=1 SV=2	1	5	4	4	2	1	2	1	1	5	0	2	1	2	1	1	4	0	2	1	2	1	1	4	0	31.6	25.8	25.8	24.033	209	209	0	14.059	By MS/MS	By matching	By MS/MS	By matching	By matching	By MS/MS		12.9	6.2
P26599	P26599	12	12	10	Polypyrimidine tract-binding protein 1	PTBP1	sp|P26599|PTBP1_HUMAN Polypyrimidine tract-binding protein 1 OS=Homo sapiens OX=9606 GN=PTBP1 PE=1 SV=1	1	12	12	10	10	0	7	8	8	10	5	10	0	7	8	8	10	5	9	0	6	7	8	8	4	33.1	33.1	29.8	57.221	531	531	0	140.14	By MS/MS		By MS/MS	By MS/MS	By MS/MS	By MS/MS	By MS/MS	27.3	0
P26639;A2RTX5	P26639	34;3	34;3	34;3	Threonine--tRNA ligase, cytoplasmic	TARS	sp|P26639|SYTC_HUMAN Threonine--tRNA ligase, cytoplasmic OS=Homo sapiens OX=9606 GN=TARS PE=1 SV=3	2	34	34	34	22	0	8	11	16	27	17	22	0	8	11	16	27	17	22	0	8	11	16	27	17	50.8	50.8	50.8	83.434	723	723;802	0	188.64	By MS/MS		By MS/MS	By MS/MS	By MS/MS	By MS/MS	By MS/MS	31	0
P26640	P26640	12	12	12	Valine--tRNA ligase	VARS	sp|P26640|SYVC_HUMAN Valine--tRNA ligase OS=Homo sapiens OX=9606 GN=VARS PE=1 SV=4	1	12	12	12	5	0	1	0	1	11	0	5	0	1	0	1	11	0	5	0	1	0	1	11	0	11.7	11.7	11.7	140.47	1264	1264	0	37.343	By MS/MS		By matching		By matching	By MS/MS		5.2	0
P26641	P26641	22	22	22	Elongation factor 1-gamma	EEF1G	sp|P26641|EF1G_HUMAN Elongation factor 1-gamma OS=Homo sapiens OX=9606 GN=EEF1G PE=1 SV=3	1	22	22	22	17	0	8	11	10	18	9	17	0	8	11	10	18	9	17	0	8	11	10	18	9	44.9	44.9	44.9	50.118	437	437	0	139.06	By MS/MS		By MS/MS	By MS/MS	By MS/MS	By MS/MS	By MS/MS	31.1	0
P26885	P26885	2	2	2	Peptidyl-prolyl cis-trans isomerase FKBP2	FKBP2	sp|P26885|FKBP2_HUMAN Peptidyl-prolyl cis-trans isomerase FKBP2 OS=Homo sapiens OX=9606 GN=FKBP2 PE=1 SV=2	1	2	2	2	2	0	0	0	1	1	1	2	0	0	0	1	1	1	2	0	0	0	1	1	1	19	19	19	15.649	142	142	0	15.186	By MS/MS				By MS/MS	By MS/MS	By matching	19	0
P27348	P27348	12	8	8	14-3-3 protein theta	YWHAQ	sp|P27348|1433T_HUMAN 14-3-3 protein theta OS=Homo sapiens OX=9606 GN=YWHAQ PE=1 SV=1	1	12	8	8	8	1	6	6	6	11	6	5	0	3	3	3	7	3	5	0	3	3	3	7	3	53.5	39.2	39.2	27.764	245	245	0	73.971	By MS/MS	By matching	By MS/MS	By matching	By MS/MS	By MS/MS	By MS/MS	39.2	4.1
P27635;Q96L21	P27635	7;3	7;3	7;3	60S ribosomal protein L10	RPL10	sp|P27635|RL10_HUMAN 60S ribosomal protein L10 OS=Homo sapiens OX=9606 GN=RPL10 PE=1 SV=4	2	7	7	7	6	0	1	2	3	6	3	6	0	1	2	3	6	3	6	0	1	2	3	6	3	23.4	23.4	23.4	24.604	214	214;214	0	16.307	By MS/MS		By matching	By matching	By MS/MS	By MS/MS	By MS/MS	19.6	0
P27694	P27694	3	3	3	Replication protein A 70 kDa DNA-binding subunit;Replication protein A 70 kDa DNA-binding subunit, N-terminally processed	RPA1	sp|P27694|RFA1_HUMAN Replication protein A 70 kDa DNA-binding subunit OS=Homo sapiens OX=9606 GN=RPA1 PE=1 SV=2	1	3	3	3	1	0	0	0	1	3	2	1	0	0	0	1	3	2	1	0	0	0	1	3	2	5.4	5.4	5.4	68.137	616	616	0	12.797	By MS/MS				By matching	By MS/MS	By matching	2.6	0
P27695	P27695	12	12	12	DNA-(apurinic or apyrimidinic site) lyase;DNA-(apurinic or apyrimidinic site) lyase, mitochondrial	APEX1	sp|P27695|APEX1_HUMAN DNA-(apurinic or apyrimidinic site) lyase OS=Homo sapiens OX=9606 GN=APEX1 PE=1 SV=2	1	12	12	12	6	0	2	1	2	9	0	6	0	2	1	2	9	0	6	0	2	1	2	9	0	47.2	47.2	47.2	35.554	318	318	0	68.427	By MS/MS		By matching	By matching	By MS/MS	By MS/MS		26.7	0
P27708	P27708	14	14	14	CAD protein;Glutamine-dependent carbamoyl-phosphate synthase;Aspartate carbamoyltransferase;Dihydroorotase	CAD	sp|P27708|PYR1_HUMAN CAD protein OS=Homo sapiens OX=9606 GN=CAD PE=1 SV=3	1	14	14	14	6	0	0	0	5	11	0	6	0	0	0	5	11	0	6	0	0	0	5	11	0	7.1	7.1	7.1	242.98	2225	2225	0	23.831	By MS/MS				By matching	By MS/MS		3.3	0
P27797	P27797	13	13	13	Calreticulin	CALR	sp|P27797|CALR_HUMAN Calreticulin OS=Homo sapiens OX=9606 GN=CALR PE=1 SV=1	1	13	13	13	8	0	5	4	7	11	6	8	0	5	4	7	11	6	8	0	5	4	7	11	6	34.8	34.8	34.8	48.141	417	417	0	70.64	By MS/MS		By MS/MS	By MS/MS	By MS/MS	By MS/MS	By MS/MS	20.4	0
P27816	P27816	24	24	24	Microtubule-associated protein 4	MAP4	sp|P27816|MAP4_HUMAN Microtubule-associated protein 4 OS=Homo sapiens OX=9606 GN=MAP4 PE=1 SV=3	1	24	24	24	16	0	5	6	12	21	2	16	0	5	6	12	21	2	16	0	5	6	12	21	2	25.2	25.2	25.2	121	1152	1152	0	132.04	By MS/MS		By MS/MS	By MS/MS	By MS/MS	By MS/MS	By matching	18.6	0
P27824;O14967	P27824	19;1	19;1	19;1	Calnexin	CANX	sp|P27824|CALX_HUMAN Calnexin OS=Homo sapiens OX=9606 GN=CANX PE=1 SV=2	2	19	19	19	11	0	6	6	10	16	5	11	0	6	6	10	16	5	11	0	6	6	10	16	5	33.3	33.3	33.3	67.567	592	592;610	0	141.57	By MS/MS		By MS/MS	By MS/MS	By MS/MS	By MS/MS	By matching	23.6	0
P28066	P28066	7	7	7	Proteasome subunit alpha type-5	PSMA5	sp|P28066|PSA5_HUMAN Proteasome subunit alpha type-5 OS=Homo sapiens OX=9606 GN=PSMA5 PE=1 SV=3	1	7	7	7	7	0	4	4	7	3	3	7	0	4	4	7	3	3	7	0	4	4	7	3	3	38.6	38.6	38.6	26.411	241	241	0	39.898	By MS/MS		By MS/MS	By MS/MS	By MS/MS	By MS/MS	By MS/MS	38.6	0
P28070	P28070	3	3	3	Proteasome subunit beta type-4	PSMB4	sp|P28070|PSB4_HUMAN Proteasome subunit beta type-4 OS=Homo sapiens OX=9606 GN=PSMB4 PE=1 SV=4	1	3	3	3	2	0	0	2	3	2	1	2	0	0	2	3	2	1	2	0	0	2	3	2	1	15.5	15.5	15.5	29.204	264	264	0	16.803	By MS/MS			By MS/MS	By MS/MS	By MS/MS	By MS/MS	7.2	0
P28072	P28072	5	5	5	Proteasome subunit beta type-6	PSMB6	sp|P28072|PSB6_HUMAN Proteasome subunit beta type-6 OS=Homo sapiens OX=9606 GN=PSMB6 PE=1 SV=4	1	5	5	5	5	0	3	3	3	4	1	5	0	3	3	3	4	1	5	0	3	3	3	4	1	32.2	32.2	32.2	25.357	239	239	0	66.947	By MS/MS		By MS/MS	By MS/MS	By MS/MS	By MS/MS	By MS/MS	32.2	0
P28074	P28074	7	7	7	Proteasome subunit beta type-5	PSMB5	sp|P28074|PSB5_HUMAN Proteasome subunit beta type-5 OS=Homo sapiens OX=9606 GN=PSMB5 PE=1 SV=3	1	7	7	7	6	0	5	5	5	7	3	6	0	5	5	5	7	3	6	0	5	5	5	7	3	30.8	30.8	30.8	28.48	263	263	0	38.817	By MS/MS		By MS/MS	By MS/MS	By MS/MS	By MS/MS	By MS/MS	27	0
P28288	P28288	1	1	1	ATP-binding cassette sub-family D member 3	ABCD3	sp|P28288|ABCD3_HUMAN ATP-binding cassette sub-family D member 3 OS=Homo sapiens OX=9606 GN=ABCD3 PE=1 SV=1	1	1	1	1	0	0	0	0	0	1	0	0	0	0	0	0	1	0	0	0	0	0	0	1	0	2.3	2.3	2.3	75.475	659	659	0.00065876	2.5991						By MS/MS		0	0
P28482;P27361	P28482	5;1	5;1	5;1	Mitogen-activated protein kinase 1	MAPK1	sp|P28482|MK01_HUMAN Mitogen-activated protein kinase 1 OS=Homo sapiens OX=9606 GN=MAPK1 PE=1 SV=3	2	5	5	5	0	0	0	0	1	5	0	0	0	0	0	1	5	0	0	0	0	0	1	5	0	16.7	16.7	16.7	41.389	360	360;379	0	11.239					By matching	By MS/MS		0	0
P28799	P28799	1	1	1	Granulins;Acrogranin;Paragranulin;Granulin-1;Granulin-2;Granulin-3;Granulin-4;Granulin-5;Granulin-6;Granulin-7	GRN	sp|P28799|GRN_HUMAN Granulins OS=Homo sapiens OX=9606 GN=GRN PE=1 SV=2	1	1	1	1	0	0	0	0	0	1	0	0	0	0	0	0	1	0	0	0	0	0	0	1	0	2.7	2.7	2.7	63.544	593	593	0.00065833	2.5914						By MS/MS		0	0
P28838	P28838	11	11	11	Cytosol aminopeptidase	LAP3	sp|P28838|AMPL_HUMAN Cytosol aminopeptidase OS=Homo sapiens OX=9606 GN=LAP3 PE=1 SV=3	1	11	11	11	7	0	1	1	3	7	0	7	0	1	1	3	7	0	7	0	1	1	3	7	0	25.6	25.6	25.6	56.166	519	519	0	28.932	By MS/MS		By matching	By matching	By matching	By MS/MS		14.8	0
P29317;P54762;P54764;P54760;Q15375;P54753;Q9UF33;P29323	P29317	7;1;1;1;1;1;1;1	7;1;1;1;1;1;1;1	7;1;1;1;1;1;1;1	Ephrin type-A receptor 2	EPHA2	sp|P29317|EPHA2_HUMAN Ephrin type-A receptor 2 OS=Homo sapiens OX=9606 GN=EPHA2 PE=1 SV=2	8	7	7	7	2	0	0	0	1	5	0	2	0	0	0	1	5	0	2	0	0	0	1	5	0	9.3	9.3	9.3	108.27	976	976;984;986;987;998;998;1036;1055	0	14.581	By MS/MS				By matching	By MS/MS		2.5	0
P29401	P29401	36	36	36	Transketolase	TKT	sp|P29401|TKT_HUMAN Transketolase OS=Homo sapiens OX=9606 GN=TKT PE=1 SV=3	1	36	36	36	31	1	23	26	23	29	19	31	1	23	26	23	29	19	31	1	23	26	23	29	19	63.1	63.1	63.1	67.877	623	623	0	312.35	By MS/MS	By matching	By MS/MS	By MS/MS	By MS/MS	By MS/MS	By MS/MS	58.4	1.3
P29474	P29474	1	1	1	Nitric oxide synthase, endothelial	NOS3	sp|P29474|NOS3_HUMAN Nitric oxide synthase, endothelial OS=Homo sapiens OX=9606 GN=NOS3 PE=1 SV=4	1	1	1	1	0	0	0	0	0	1	0	0	0	0	0	0	1	0	0	0	0	0	0	1	0	1.4	1.4	1.4	133.27	1203	1203	0.0042424	1.8005						By MS/MS		0	0
P29692	P29692	15	15	13	Elongation factor 1-delta	EEF1D	sp|P29692|EF1D_HUMAN Elongation factor 1-delta OS=Homo sapiens OX=9606 GN=EEF1D PE=1 SV=5	1	15	15	13	14	0	9	7	13	11	8	14	0	9	7	13	11	8	12	0	8	6	12	10	8	55.5	55.5	55.2	31.121	281	281	0	215.62	By MS/MS		By MS/MS	By MS/MS	By MS/MS	By MS/MS	By MS/MS	52.3	0
P29966	P29966	11	11	11	Myristoylated alanine-rich C-kinase substrate	MARCKS	sp|P29966|MARCS_HUMAN Myristoylated alanine-rich C-kinase substrate OS=Homo sapiens OX=9606 GN=MARCKS PE=1 SV=4	1	11	11	11	10	0	6	2	7	11	1	10	0	6	2	7	11	1	10	0	6	2	7	11	1	45.2	45.2	45.2	31.554	332	332	0	104.85	By MS/MS		By MS/MS	By MS/MS	By MS/MS	By MS/MS	By MS/MS	45.2	0
P30040	P30040	4	4	4	Endoplasmic reticulum resident protein 29	ERP29	sp|P30040|ERP29_HUMAN Endoplasmic reticulum resident protein 29 OS=Homo sapiens OX=9606 GN=ERP29 PE=1 SV=4	1	4	4	4	3	0	2	0	1	3	1	3	0	2	0	1	3	1	3	0	2	0	1	3	1	17.2	17.2	17.2	28.993	261	261	0	8.3396	By MS/MS		By matching		By matching	By MS/MS	By matching	13.4	0
P30041	P30041	17	17	17	Peroxiredoxin-6	PRDX6	sp|P30041|PRDX6_HUMAN Peroxiredoxin-6 OS=Homo sapiens OX=9606 GN=PRDX6 PE=1 SV=3	1	17	17	17	14	0	9	9	13	13	6	14	0	9	9	13	13	6	14	0	9	9	13	13	6	81.7	81.7	81.7	25.035	224	224	0	173.02	By MS/MS		By MS/MS	By MS/MS	By MS/MS	By MS/MS	By MS/MS	70.5	0
P30043	P30043	3	3	3	Flavin reductase (NADPH)	BLVRB	sp|P30043|BLVRB_HUMAN Flavin reductase (NADPH) OS=Homo sapiens OX=9606 GN=BLVRB PE=1 SV=3	1	3	3	3	1	0	0	0	0	3	0	1	0	0	0	0	3	0	1	0	0	0	0	3	0	21.4	21.4	21.4	22.119	206	206	0	4.9812	By MS/MS					By MS/MS		4.9	0
P30044	P30044	9	9	9	Peroxiredoxin-5, mitochondrial	PRDX5	sp|P30044|PRDX5_HUMAN Peroxiredoxin-5, mitochondrial OS=Homo sapiens OX=9606 GN=PRDX5 PE=1 SV=4	1	9	9	9	8	0	2	3	6	6	4	8	0	2	3	6	6	4	8	0	2	3	6	6	4	48.6	48.6	48.6	22.086	214	214	0	49.109	By MS/MS		By matching	By MS/MS	By MS/MS	By MS/MS	By MS/MS	48.1	0
P30048	P30048	5	5	5	Thioredoxin-dependent peroxide reductase, mitochondrial	PRDX3	sp|P30048|PRDX3_HUMAN Thioredoxin-dependent peroxide reductase, mitochondrial OS=Homo sapiens OX=9606 GN=PRDX3 PE=1 SV=3	1	5	5	5	5	0	4	3	4	4	2	5	0	4	3	4	4	2	5	0	4	3	4	4	2	27.7	27.7	27.7	27.692	256	256	0	29.857	By MS/MS		By MS/MS	By MS/MS	By MS/MS	By MS/MS	By MS/MS	27.7	0
P30049	P30049	2	2	2	ATP synthase subunit delta, mitochondrial	ATP5D	sp|P30049|ATPD_HUMAN ATP synthase subunit delta, mitochondrial OS=Homo sapiens OX=9606 GN=ATP5F1D PE=1 SV=2	1	2	2	2	2	0	2	2	2	2	1	2	0	2	2	2	2	1	2	0	2	2	2	2	1	13.7	13.7	13.7	17.49	168	168	0	17.661	By MS/MS		By MS/MS	By MS/MS	By MS/MS	By MS/MS	By matching	13.7	0
P30050	P30050	6	6	6	60S ribosomal protein L12	RPL12	sp|P30050|RL12_HUMAN 60S ribosomal protein L12 OS=Homo sapiens OX=9606 GN=RPL12 PE=1 SV=1	1	6	6	6	6	0	6	6	5	4	4	6	0	6	6	5	4	4	6	0	6	6	5	4	4	54.5	54.5	54.5	17.818	165	165	0	128.45	By MS/MS		By MS/MS	By MS/MS	By MS/MS	By MS/MS	By MS/MS	54.5	0
P30084	P30084	8	8	8	Enoyl-CoA hydratase, mitochondrial	ECHS1	sp|P30084|ECHM_HUMAN Enoyl-CoA hydratase, mitochondrial OS=Homo sapiens OX=9606 GN=ECHS1 PE=1 SV=4	1	8	8	8	6	0	1	3	4	3	0	6	0	1	3	4	3	0	6	0	1	3	4	3	0	40.3	40.3	40.3	31.387	290	290	0	55.503	By MS/MS		By matching	By matching	By MS/MS	By MS/MS		33.1	0
P30085	P30085	5	5	5	UMP-CMP kinase	CMPK1	sp|P30085|KCY_HUMAN UMP-CMP kinase OS=Homo sapiens OX=9606 GN=CMPK1 PE=1 SV=3	1	5	5	5	2	0	0	0	2	4	0	2	0	0	0	2	4	0	2	0	0	0	2	4	0	29.6	29.6	29.6	22.222	196	196	0	15.416	By MS/MS				By MS/MS	By MS/MS		12.8	0
P30086	P30086	9	9	9	Phosphatidylethanolamine-binding protein 1;Hippocampal cholinergic neurostimulating peptide	PEBP1	sp|P30086|PEBP1_HUMAN Phosphatidylethanolamine-binding protein 1 OS=Homo sapiens OX=9606 GN=PEBP1 PE=1 SV=3	1	9	9	9	7	0	4	4	5	8	6	7	0	4	4	5	8	6	7	0	4	4	5	8	6	63.1	63.1	63.1	21.057	187	187	0	46.974	By MS/MS		By MS/MS	By MS/MS	By MS/MS	By MS/MS	By MS/MS	46.5	0
P30101	P30101	29	29	29	Protein disulfide-isomerase A3	PDIA3	sp|P30101|PDIA3_HUMAN Protein disulfide-isomerase A3 OS=Homo sapiens OX=9606 GN=PDIA3 PE=1 SV=4	1	29	29	29	24	0	16	17	19	23	14	24	0	16	17	19	23	14	24	0	16	17	19	23	14	58.4	58.4	58.4	56.782	505	505	0	316.92	By MS/MS		By MS/MS	By MS/MS	By MS/MS	By MS/MS	By MS/MS	48.5	0
P30153;P30154	P30153	16;5	16;5	16;5	Serine/threonine-protein phosphatase 2A 65 kDa regulatory subunit A alpha isoform	PPP2R1A	sp|P30153|2AAA_HUMAN Serine/threonine-protein phosphatase 2A 65 kDa regulatory subunit A alpha isoform OS=Homo sapiens OX=9606 GN=PPP2R1A PE=1 SV=4	2	16	16	16	9	0	2	2	5	10	2	9	0	2	2	5	10	2	9	0	2	2	5	10	2	33.4	33.4	33.4	65.308	589	589;601	0	113.74	By MS/MS		By matching	By matching	By MS/MS	By MS/MS	By matching	19	0
P30419;O60551	P30419	5;1	5;1	5;1	Glycylpeptide N-tetradecanoyltransferase 1	NMT1	sp|P30419|NMT1_HUMAN Glycylpeptide N-tetradecanoyltransferase 1 OS=Homo sapiens OX=9606 GN=NMT1 PE=1 SV=2	2	5	5	5	3	0	0	1	1	4	0	3	0	0	1	1	4	0	3	0	0	1	1	4	0	11.7	11.7	11.7	56.806	496	496;498	0	10.595	By MS/MS			By matching	By matching	By MS/MS		6.7	0
P30520;Q8N142	P30520	11;1	11;1	11;1	Adenylosuccinate synthetase isozyme 2	ADSS	sp|P30520|PURA2_HUMAN Adenylosuccinate synthetase isozyme 2 OS=Homo sapiens OX=9606 GN=ADSS PE=1 SV=3	2	11	11	11	7	0	0	1	3	9	0	7	0	0	1	3	9	0	7	0	0	1	3	9	0	29.4	29.4	29.4	50.097	456	456;457	0	23.655	By MS/MS			By matching	By matching	By MS/MS		19.1	0
P30533	P30533	2	2	2	Alpha-2-macroglobulin receptor-associated protein	LRPAP1	sp|P30533|AMRP_HUMAN Alpha-2-macroglobulin receptor-associated protein OS=Homo sapiens OX=9606 GN=LRPAP1 PE=1 SV=1	1	2	2	2	0	0	0	0	0	2	0	0	0	0	0	0	2	0	0	0	0	0	0	2	0	7	7	7	41.465	357	357	0	3.5904						By MS/MS		0	0
P30566	P30566	8	8	8	Adenylosuccinate lyase	ADSL	sp|P30566|PUR8_HUMAN Adenylosuccinate lyase OS=Homo sapiens OX=9606 GN=ADSL PE=1 SV=2	1	8	8	8	5	0	1	1	2	6	1	5	0	1	1	2	6	1	5	0	1	1	2	6	1	22.9	22.9	22.9	54.889	484	484	0	60.593	By MS/MS		By matching	By matching	By MS/MS	By MS/MS	By matching	16.9	0
P30626	P30626	5	5	5	Sorcin	SRI	sp|P30626|SORCN_HUMAN Sorcin OS=Homo sapiens OX=9606 GN=SRI PE=1 SV=1	1	5	5	5	3	0	2	1	4	4	1	3	0	2	1	4	4	1	3	0	2	1	4	4	1	24.7	24.7	24.7	21.676	198	198	0	10.701	By MS/MS		By matching	By matching	By MS/MS	By MS/MS	By matching	17.2	0
P30837	P30837	14	14	12	Aldehyde dehydrogenase X, mitochondrial	ALDH1B1	sp|P30837|AL1B1_HUMAN Aldehyde dehydrogenase X, mitochondrial OS=Homo sapiens OX=9606 GN=ALDH1B1 PE=1 SV=3	1	14	14	12	10	0	6	5	7	9	1	10	0	6	5	7	9	1	9	0	6	5	6	8	0	30.4	30.4	28.6	57.206	517	517	0	94.583	By MS/MS		By MS/MS	By MS/MS	By MS/MS	By MS/MS	By MS/MS	24.8	0
P30838	P30838	4	4	3	Aldehyde dehydrogenase, dimeric NADP-preferring	ALDH3A1	sp|P30838|AL3A1_HUMAN Aldehyde dehydrogenase, dimeric NADP-preferring OS=Homo sapiens OX=9606 GN=ALDH3A1 PE=1 SV=3	1	4	4	3	3	0	0	0	4	3	0	3	0	0	0	4	3	0	2	0	0	0	3	3	0	10.4	10.4	7.7	50.394	453	453	0	12.816	By matching				By MS/MS	By MS/MS		7.7	0
P31040	P31040	14	14	14	Succinate dehydrogenase [ubiquinone] flavoprotein subunit, mitochondrial	SDHA	sp|P31040|SDHA_HUMAN Succinate dehydrogenase [ubiquinone] flavoprotein subunit, mitochondrial OS=Homo sapiens OX=9606 GN=SDHA PE=1 SV=2	1	14	14	14	7	0	3	5	6	13	3	7	0	3	5	6	13	3	7	0	3	5	6	13	3	22.9	22.9	22.9	72.691	664	664	0	74.533	By MS/MS		By matching	By matching	By MS/MS	By MS/MS	By MS/MS	12.5	0
P31150	P31150	12	3	3	Rab GDP dissociation inhibitor alpha	GDI1	sp|P31150|GDIA_HUMAN Rab GDP dissociation inhibitor alpha OS=Homo sapiens OX=9606 GN=GDI1 PE=1 SV=2	1	12	3	3	7	0	1	0	5	10	3	0	0	0	0	0	3	0	0	0	0	0	0	3	0	30	8.3	8.3	50.582	447	447	0	6.5972	By matching		By matching		By matching	By MS/MS	By matching	17.2	0
P31151;Q86SG5	P31151;Q86SG5	2;1	2;1	2;1	Protein S100-A7;Protein S100-A7A	S100A7;S100A7A	sp|P31151|S10A7_HUMAN Protein S100-A7 OS=Homo sapiens OX=9606 GN=S100A7 PE=1 SV=4;sp|Q86SG5|S1A7A_HUMAN Protein S100-A7A OS=Homo sapiens OX=9606 GN=S100A7A PE=1 SV=3	2	2	2	2	2	0	2	2	2	0	0	2	0	2	2	2	0	0	2	0	2	2	2	0	0	29.7	29.7	29.7	11.471	101	101;101	0	7.7495	By MS/MS		By MS/MS	By MS/MS	By MS/MS			29.7	0
P31153;Q00266	P31153	8;1	8;1	8;1	S-adenosylmethionine synthase isoform type-2	MAT2A	sp|P31153|METK2_HUMAN S-adenosylmethionine synthase isoform type-2 OS=Homo sapiens OX=9606 GN=MAT2A PE=1 SV=1	2	8	8	8	4	0	2	3	2	7	0	4	0	2	3	2	7	0	4	0	2	3	2	7	0	26.3	26.3	26.3	43.66	395	395;395	0	31.184	By MS/MS		By matching	By matching	By MS/MS	By MS/MS		16.2	0
P31327	P31327	14	14	14	Carbamoyl-phosphate synthase [ammonia], mitochondrial	CPS1	sp|P31327|CPSM_HUMAN Carbamoyl-phosphate synthase [ammonia], mitochondrial OS=Homo sapiens OX=9606 GN=CPS1 PE=1 SV=2	1	14	14	14	11	0	6	5	1	7	3	11	0	6	5	1	7	3	11	0	6	5	1	7	3	11.4	11.4	11.4	164.94	1500	1500	0	36.053	By MS/MS		By MS/MS	By matching	By matching	By MS/MS	By matching	8.7	0
P31689	P31689	15	15	15	DnaJ homolog subfamily A member 1	DNAJA1	sp|P31689|DNJA1_HUMAN DnaJ homolog subfamily A member 1 OS=Homo sapiens OX=9606 GN=DNAJA1 PE=1 SV=2	1	15	15	15	10	0	6	4	6	11	1	10	0	6	4	6	11	1	10	0	6	4	6	11	1	44.6	44.6	44.6	44.868	397	397	0	153.45	By MS/MS		By MS/MS	By MS/MS	By MS/MS	By MS/MS	By matching	31.5	0
P31930	P31930	8	8	7	Cytochrome b-c1 complex subunit 1, mitochondrial	UQCRC1	sp|P31930|QCR1_HUMAN Cytochrome b-c1 complex subunit 1, mitochondrial OS=Homo sapiens OX=9606 GN=UQCRC1 PE=1 SV=3	1	8	8	7	4	0	3	1	3	8	3	4	0	3	1	3	8	3	3	0	3	1	3	7	2	17.9	17.9	16.5	52.645	480	480	0	21.923	By MS/MS		By MS/MS	By matching	By MS/MS	By MS/MS	By MS/MS	10	0
P31939	P31939	20	20	20	Bifunctional purine biosynthesis protein PURH;Phosphoribosylaminoimidazolecarboxamide formyltransferase;IMP cyclohydrolase	ATIC	sp|P31939|PUR9_HUMAN Bifunctional purine biosynthesis protein PURH OS=Homo sapiens OX=9606 GN=ATIC PE=1 SV=3	1	20	20	20	17	0	7	7	13	17	5	17	0	7	7	13	17	5	17	0	7	7	13	17	5	48	48	48	64.615	592	592	0	128.21	By MS/MS		By matching	By matching	By MS/MS	By MS/MS	By matching	39.9	0
P31942	P31942	6	5	5	Heterogeneous nuclear ribonucleoprotein H3	HNRNPH3	sp|P31942|HNRH3_HUMAN Heterogeneous nuclear ribonucleoprotein H3 OS=Homo sapiens OX=9606 GN=HNRNPH3 PE=1 SV=2	1	6	5	5	3	0	4	3	4	6	3	3	0	4	3	4	5	2	3	0	4	3	4	5	2	19.9	17.6	17.6	36.926	346	346	0	72.317	By MS/MS		By matching	By MS/MS	By MS/MS	By MS/MS	By MS/MS	11.3	0
P31943	P31943	16	16	8	Heterogeneous nuclear ribonucleoprotein H;Heterogeneous nuclear ribonucleoprotein H, N-terminally processed	HNRNPH1	sp|P31943|HNRH1_HUMAN Heterogeneous nuclear ribonucleoprotein H OS=Homo sapiens OX=9606 GN=HNRNPH1 PE=1 SV=4	1	16	16	8	11	0	9	9	9	12	9	11	0	9	9	9	12	9	7	0	5	5	5	5	4	54.1	54.1	34.3	49.229	449	449	0	146.38	By MS/MS		By MS/MS	By MS/MS	By MS/MS	By MS/MS	By MS/MS	41.6	0
P31944	P31944	1	1	1	Caspase-14;Caspase-14 subunit p17, mature form;Caspase-14 subunit p10, mature form;Caspase-14 subunit p20, intermediate form;Caspase-14 subunit p8, intermediate form	CASP14	sp|P31944|CASPE_HUMAN Caspase-14 OS=Homo sapiens OX=9606 GN=CASP14 PE=1 SV=2	1	1	1	1	0	0	1	0	0	0	0	0	0	1	0	0	0	0	0	0	1	0	0	0	0	4.1	4.1	4.1	27.679	242	242	0.00064558	2.4131			By MS/MS					0	0
P31946	P31946	11	5	5	14-3-3 protein beta/alpha;14-3-3 protein beta/alpha, N-terminally processed	YWHAB	sp|P31946|1433B_HUMAN 14-3-3 protein beta/alpha OS=Homo sapiens OX=9606 GN=YWHAB PE=1 SV=3	1	11	5	5	9	1	6	6	8	10	6	5	0	3	3	5	5	3	5	0	3	3	5	5	3	56.5	30.5	30.5	28.082	246	246	0	134.92	By MS/MS	By matching	By MS/MS	By MS/MS	By MS/MS	By MS/MS	By MS/MS	50	4.1
P31947	P31947	14	11	11	14-3-3 protein sigma	SFN	sp|P31947|1433S_HUMAN 14-3-3 protein sigma OS=Homo sapiens OX=9606 GN=SFN PE=1 SV=1	1	14	11	11	11	2	4	3	4	11	5	9	1	2	1	2	8	3	9	1	2	1	2	8	3	61.7	51.6	51.6	27.774	248	248	0	78.179	By MS/MS	By matching	By MS/MS	By MS/MS	By MS/MS	By MS/MS	By MS/MS	52.4	7.3
P31948	P31948	28	28	28	Stress-induced-phosphoprotein 1	STIP1	sp|P31948|STIP1_HUMAN Stress-induced-phosphoprotein 1 OS=Homo sapiens OX=9606 GN=STIP1 PE=1 SV=1	1	28	28	28	17	0	9	7	13	21	12	17	0	9	7	13	21	12	17	0	9	7	13	21	12	45.9	45.9	45.9	62.639	543	543	0	83.716	By MS/MS		By MS/MS	By MS/MS	By MS/MS	By MS/MS	By MS/MS	30.8	0
P31949	P31949	6	6	6	Protein S100-A11;Protein S100-A11, N-terminally processed	S100A11	sp|P31949|S10AB_HUMAN Protein S100-A11 OS=Homo sapiens OX=9606 GN=S100A11 PE=1 SV=2	1	6	6	6	6	0	5	4	6	4	5	6	0	5	4	6	4	5	6	0	5	4	6	4	5	52.4	52.4	52.4	11.74	105	105	0	48.962	By MS/MS		By MS/MS	By MS/MS	By MS/MS	By MS/MS	By MS/MS	52.4	0
P32119	P32119	12	11	11	Peroxiredoxin-2	PRDX2	sp|P32119|PRDX2_HUMAN Peroxiredoxin-2 OS=Homo sapiens OX=9606 GN=PRDX2 PE=1 SV=5	1	12	11	11	12	0	7	7	9	9	4	11	0	6	6	8	8	3	11	0	6	6	8	8	3	73.2	67.7	67.7	21.892	198	198	0	78.105	By MS/MS		By MS/MS	By matching	By MS/MS	By MS/MS	By MS/MS	73.2	0
P32320	P32320	3	3	3	Cytidine deaminase	CDA	sp|P32320|CDD_HUMAN Cytidine deaminase OS=Homo sapiens OX=9606 GN=CDA PE=1 SV=2	1	3	3	3	3	0	0	1	3	2	1	3	0	0	1	3	2	1	3	0	0	1	3	2	1	41.1	41.1	41.1	16.185	146	146	0	35.394	By MS/MS			By matching	By MS/MS	By MS/MS	By matching	41.1	0
P32455;P32456;Q9H0R5	P32455	8;1;1	8;1;1	8;1;1	Interferon-induced guanylate-binding protein 1	GBP1	sp|P32455|GBP1_HUMAN Guanylate-binding protein 1 OS=Homo sapiens OX=9606 GN=GBP1 PE=1 SV=2	3	8	8	8	3	0	0	1	1	8	1	3	0	0	1	1	8	1	3	0	0	1	1	8	1	12.7	12.7	12.7	67.93	592	592;591;595	0	25.265	By MS/MS			By matching	By MS/MS	By MS/MS	By matching	4.9	0
P32969	P32969	7	7	7	60S ribosomal protein L9	RPL9	sp|P32969|RL9_HUMAN 60S ribosomal protein L9 OS=Homo sapiens OX=9606 GN=RPL9 PE=1 SV=1	1	7	7	7	7	0	3	3	4	4	1	7	0	3	3	4	4	1	7	0	3	3	4	4	1	60.9	60.9	60.9	21.863	192	192	0	91.244	By MS/MS		By MS/MS	By MS/MS	By MS/MS	By MS/MS	By MS/MS	60.9	0
P32970	P32970	1	1	1	CD70 antigen	CD70	sp|P32970|CD70_HUMAN CD70 antigen OS=Homo sapiens OX=9606 GN=CD70 PE=1 SV=2	1	1	1	1	1	0	0	0	1	1	0	1	0	0	0	1	1	0	1	0	0	0	1	1	0	6.7	6.7	6.7	21.118	193	193	0.00066094	2.638	By MS/MS				By matching	By MS/MS		6.7	0
P33176;O60282	P33176	20;4	20;4	16;0	Kinesin-1 heavy chain	KIF5B	sp|P33176|KINH_HUMAN Kinesin-1 heavy chain OS=Homo sapiens OX=9606 GN=KIF5B PE=1 SV=1	2	20	20	16	11	0	1	2	6	19	1	11	0	1	2	6	19	1	9	0	0	0	5	15	1	23.3	23.3	18.7	109.68	963	963;957	0	63.733	By MS/MS		By matching	By matching	By MS/MS	By MS/MS	By matching	12	0
P33316	P33316	7	7	7	Deoxyuridine 5-triphosphate nucleotidohydrolase, mitochondrial	DUT	sp|P33316|DUT_HUMAN Deoxyuridine 5-triphosphate nucleotidohydrolase, mitochondrial OS=Homo sapiens OX=9606 GN=DUT PE=1 SV=4	1	7	7	7	4	0	2	1	2	6	0	4	0	2	1	2	6	0	4	0	2	1	2	6	0	29	29	29	26.563	252	252	0	56.881	By MS/MS		By MS/MS	By MS/MS	By MS/MS	By MS/MS		17.5	0
P33552	P33552	1	1	1	Cyclin-dependent kinases regulatory subunit 2	CKS2	sp|P33552|CKS2_HUMAN Cyclin-dependent kinases regulatory subunit 2 OS=Homo sapiens OX=9606 GN=CKS2 PE=1 SV=1	1	1	1	1	0	0	0	0	0	1	0	0	0	0	0	0	1	0	0	0	0	0	0	1	0	11.4	11.4	11.4	9.8602	79	79	0.001265	2.2026						By MS/MS		0	0
P33991	P33991	8	8	8	DNA replication licensing factor MCM4	MCM4	sp|P33991|MCM4_HUMAN DNA replication licensing factor MCM4 OS=Homo sapiens OX=9606 GN=MCM4 PE=1 SV=5	1	8	8	8	4	0	1	0	1	6	2	4	0	1	0	1	6	2	4	0	1	0	1	6	2	10.1	10.1	10.1	96.557	863	863	0	20.151	By MS/MS		By matching		By matching	By MS/MS	By matching	5	0
P33992	P33992	5	5	5	DNA replication licensing factor MCM5	MCM5	sp|P33992|MCM5_HUMAN DNA replication licensing factor MCM5 OS=Homo sapiens OX=9606 GN=MCM5 PE=1 SV=5	1	5	5	5	3	0	1	0	1	5	2	3	0	1	0	1	5	2	3	0	1	0	1	5	2	8.2	8.2	8.2	82.285	734	734	0	10.178	By MS/MS		By matching		By matching	By MS/MS	By matching	5.4	0
P33993	P33993	12	12	12	DNA replication licensing factor MCM7	MCM7	sp|P33993|MCM7_HUMAN DNA replication licensing factor MCM7 OS=Homo sapiens OX=9606 GN=MCM7 PE=1 SV=4	1	12	12	12	4	0	2	1	2	11	0	4	0	2	1	2	11	0	4	0	2	1	2	11	0	20.6	20.6	20.6	81.307	719	719	0	40.062	By MS/MS		By matching	By matching	By matching	By MS/MS		7.9	0
P34897	P34897	12	12	12	Serine hydroxymethyltransferase, mitochondrial	SHMT2	sp|P34897|GLYM_HUMAN Serine hydroxymethyltransferase, mitochondrial OS=Homo sapiens OX=9606 GN=SHMT2 PE=1 SV=3	1	12	12	12	8	0	7	5	6	10	3	8	0	7	5	6	10	3	8	0	7	5	6	10	3	25.8	25.8	25.8	55.992	504	504	0	32.448	By MS/MS		By matching	By matching	By MS/MS	By MS/MS	By matching	19.2	0
P34931	P34931	13	1	1	Heat shock 70 kDa protein 1-like	HSPA1L	sp|P34931|HS71L_HUMAN Heat shock 70 kDa protein 1-like OS=Homo sapiens OX=9606 GN=HSPA1L PE=1 SV=2	1	13	1	1	7	0	6	5	6	12	9	0	0	0	0	0	1	0	0	0	0	0	0	1	0	23.4	1.7	1.7	70.374	641	641	0.0058789	1.5829	By matching		By matching	By matching	By matching	By MS/MS	By matching	13.1	0
P34932	P34932	29	29	27	Heat shock 70 kDa protein 4	HSPA4	sp|P34932|HSP74_HUMAN Heat shock 70 kDa protein 4 OS=Homo sapiens OX=9606 GN=HSPA4 PE=1 SV=4	1	29	29	27	16	0	9	7	12	22	1	16	0	9	7	12	22	1	15	0	8	6	11	20	0	39.2	39.2	36.5	94.33	840	840	0	123.79	By MS/MS		By matching	By matching	By MS/MS	By MS/MS	By matching	21.9	0
P35030	P35030	1	1	1	Trypsin-3	PRSS3	sp|P35030|TRY3_HUMAN Trypsin-3 OS=Homo sapiens OX=9606 GN=PRSS3 PE=1 SV=2	1	1	1	1	0	0	1	1	1	0	1	0	0	1	1	1	0	1	0	0	1	1	1	0	1	4.3	4.3	4.3	32.528	304	304	0	4.9633			By MS/MS	By MS/MS	By matching		By MS/MS	0	0
P35080	P35080	2	2	2	Profilin-2	PFN2	sp|P35080|PROF2_HUMAN Profilin-2 OS=Homo sapiens OX=9606 GN=PFN2 PE=1 SV=3	1	2	2	2	2	0	0	0	2	1	0	2	0	0	0	2	1	0	2	0	0	0	2	1	0	20.7	20.7	20.7	15.046	140	140	0	7.8653	By MS/MS				By MS/MS	By MS/MS		20.7	0
P35221;Q9UI47	P35221	17;1	17;1	13;1	Catenin alpha-1	CTNNA1	sp|P35221|CTNA1_HUMAN Catenin alpha-1 OS=Homo sapiens OX=9606 GN=CTNNA1 PE=1 SV=1	2	17	17	13	12	2	4	4	8	15	5	12	2	4	4	8	15	5	8	1	4	4	6	12	4	23.6	23.6	18	100.07	906	906;895	0	60.644	By MS/MS	By matching	By matching	By matching	By MS/MS	By MS/MS	By matching	15.1	2.1
P35222	P35222	4	2	2	Catenin beta-1	CTNNB1	sp|P35222|CTNB1_HUMAN Catenin beta-1 OS=Homo sapiens OX=9606 GN=CTNNB1 PE=1 SV=1	1	4	2	2	2	0	0	0	0	3	0	1	0	0	0	0	2	0	1	0	0	0	0	2	0	8.1	5.5	5.5	85.496	781	781	0	5.2365	By matching					By MS/MS		3.3	0
P35232	P35232	15	15	15	Prohibitin	PHB	sp|P35232|PHB_HUMAN Prohibitin OS=Homo sapiens OX=9606 GN=PHB PE=1 SV=1	1	15	15	15	11	0	5	5	7	11	1	11	0	5	5	7	11	1	11	0	5	5	7	11	1	75.7	75.7	75.7	29.804	272	272	0	165.49	By MS/MS		By matching	By matching	By MS/MS	By MS/MS	By matching	61	0
P35237;P50452	P35237	5;1	5;1	5;1	Serpin B6	SERPINB6	sp|P35237|SPB6_HUMAN Serpin B6 OS=Homo sapiens OX=9606 GN=SERPINB6 PE=1 SV=3	2	5	5	5	2	0	0	0	2	3	0	2	0	0	0	2	3	0	2	0	0	0	2	3	0	15.7	15.7	15.7	42.621	376	376;374	0	8.7675	By MS/MS				By matching	By MS/MS		8	0
P35241	P35241	23	10	10	Radixin	RDX	sp|P35241|RADI_HUMAN Radixin OS=Homo sapiens OX=9606 GN=RDX PE=1 SV=1	1	23	10	10	21	0	13	13	18	20	9	8	0	4	3	6	9	1	8	0	4	3	6	9	1	31.4	16	16	68.563	583	583	0	33.582	By MS/MS		By matching	By matching	By MS/MS	By MS/MS	By matching	29.7	0
P35268	P35268	2	2	2	60S ribosomal protein L22	RPL22	sp|P35268|RL22_HUMAN 60S ribosomal protein L22 OS=Homo sapiens OX=9606 GN=RPL22 PE=1 SV=2	1	2	2	2	2	0	2	2	2	2	2	2	0	2	2	2	2	2	2	0	2	2	2	2	2	18.8	18.8	18.8	14.787	128	128	0	22.51	By MS/MS		By MS/MS	By MS/MS	By MS/MS	By MS/MS	By MS/MS	18.8	0
P35269	P35269	1	1	1	General transcription factor IIF subunit 1	GTF2F1	sp|P35269|T2FA_HUMAN General transcription factor IIF subunit 1 OS=Homo sapiens OX=9606 GN=GTF2F1 PE=1 SV=2	1	1	1	1	0	0	0	0	0	1	0	0	0	0	0	0	1	0	0	0	0	0	0	1	0	2.7	2.7	2.7	58.24	517	517	0.0036675	1.8516						By MS/MS		0	0
P35270	P35270	2	2	2	Sepiapterin reductase	SPR	sp|P35270|SPRE_HUMAN Sepiapterin reductase OS=Homo sapiens OX=9606 GN=SPR PE=1 SV=1	1	2	2	2	1	0	0	0	1	1	0	1	0	0	0	1	1	0	1	0	0	0	1	1	0	9.6	9.6	9.6	28.048	261	261	0	3.8131	By MS/MS				By matching	By MS/MS		5.7	0
P35579;REV__Q9UKV3;P12883;P13535;Q9UKX3;Q9Y623;P13533;P12882;P11055;Q9UKX2;A7E2Y1	P35579	114;1;1;1;1;1;1;1;1;1;1	114;1;1;1;1;1;1;1;1;1;1	95;1;0;0;0;0;0;0;0;0;0	Myosin-9	MYH9	sp|P35579|MYH9_HUMAN Myosin-9 OS=Homo sapiens OX=9606 GN=MYH9 PE=1 SV=4	11	114	114	95	85	2	48	61	69	99	63	85	2	48	61	69	99	63	68	1	37	47	55	81	49	54.1	54.1	45.1	226.53	1960	1960;1341;1935;1937;1938;1939;1939;1939;1940;1941;1983	0	323.31	By MS/MS	By matching	By MS/MS	By MS/MS	By MS/MS	By MS/MS	By MS/MS	44.4	0.8
P35580	P35580	16	3	2	Myosin-10	MYH10	sp|P35580|MYH10_HUMAN Myosin-10 OS=Homo sapiens OX=9606 GN=MYH10 PE=1 SV=3	1	16	3	2	11	1	8	10	8	15	10	0	0	0	0	0	2	1	0	0	0	0	0	1	1	8.1	1.6	1.2	229	1976	1976	0	3.2956	By matching	By matching	By matching	By matching	By matching	By MS/MS	By MS/MS	5.4	0.4
P35606	P35606	8	8	8	Coatomer subunit beta	COPB2	sp|P35606|COPB2_HUMAN Coatomer subunit beta OS=Homo sapiens OX=9606 GN=COPB2 PE=1 SV=2	1	8	8	8	3	0	0	0	1	7	1	3	0	0	0	1	7	1	3	0	0	0	1	7	1	9.8	9.8	9.8	102.49	906	906	0	75.293	By MS/MS				By matching	By MS/MS	By matching	3.1	0
P35613	P35613	5	5	5	Basigin	BSG	sp|P35613|BASI_HUMAN Basigin OS=Homo sapiens OX=9606 GN=BSG PE=1 SV=2	1	5	5	5	3	0	3	3	3	5	1	3	0	3	3	3	5	1	3	0	3	3	3	5	1	18.4	18.4	18.4	42.2	385	385	0	20.283	By MS/MS		By MS/MS	By matching	By MS/MS	By MS/MS	By MS/MS	9.1	0
P35637	P35637	7	7	5	RNA-binding protein FUS	FUS	sp|P35637|FUS_HUMAN RNA-binding protein FUS OS=Homo sapiens OX=9606 GN=FUS PE=1 SV=1	1	7	7	5	4	0	4	4	4	6	4	4	0	4	4	4	6	4	2	0	2	2	2	4	2	15.8	15.8	14.1	53.425	526	526	0	59.633	By MS/MS		By MS/MS	By MS/MS	By MS/MS	By MS/MS	By MS/MS	6.3	0
P35658	P35658	2	2	2	Nuclear pore complex protein Nup214	NUP214	sp|P35658|NU214_HUMAN Nuclear pore complex protein Nup214 OS=Homo sapiens OX=9606 GN=NUP214 PE=1 SV=2	1	2	2	2	0	0	0	0	0	2	0	0	0	0	0	0	2	0	0	0	0	0	0	2	0	1.2	1.2	1.2	213.62	2090	2090	0.00067476	2.8658						By MS/MS		0	0
P35659	P35659	4	4	4	Protein DEK	DEK	sp|P35659|DEK_HUMAN Protein DEK OS=Homo sapiens OX=9606 GN=DEK PE=1 SV=1	1	4	4	4	0	0	0	0	0	4	0	0	0	0	0	0	4	0	0	0	0	0	0	4	0	11.7	11.7	11.7	42.674	375	375	0	9.901						By MS/MS		0	0
P35754	P35754	4	4	4	Glutaredoxin-1	GLRX	sp|P35754|GLRX1_HUMAN Glutaredoxin-1 OS=Homo sapiens OX=9606 GN=GLRX PE=1 SV=2	1	4	4	4	2	0	0	0	1	3	0	2	0	0	0	1	3	0	2	0	0	0	1	3	0	31.1	31.1	31.1	11.776	106	106	0	6.0964	By MS/MS				By matching	By MS/MS		11.3	0
P35998	P35998	14	14	14	26S protease regulatory subunit 7	PSMC2	sp|P35998|PRS7_HUMAN 26S proteasome regulatory subunit 7 OS=Homo sapiens OX=9606 GN=PSMC2 PE=1 SV=3	1	14	14	14	9	0	1	3	7	8	0	9	0	1	3	7	8	0	9	0	1	3	7	8	0	31.2	31.2	31.2	48.633	433	433	0	54.042	By MS/MS		By matching	By matching	By MS/MS	By MS/MS		22.2	0
P36405	P36405	1	1	1	ADP-ribosylation factor-like protein 3	ARL3	sp|P36405|ARL3_HUMAN ADP-ribosylation factor-like protein 3 OS=Homo sapiens OX=9606 GN=ARL3 PE=1 SV=2	1	1	1	1	1	0	0	0	1	0	0	1	0	0	0	1	0	0	1	0	0	0	1	0	0	10.4	10.4	10.4	20.455	182	182	0.0036585	1.8344	By MS/MS				By matching			10.4	0
P36507	P36507	5	2	2	Dual specificity mitogen-activated protein kinase kinase 2	MAP2K2	sp|P36507|MP2K2_HUMAN Dual specificity mitogen-activated protein kinase kinase 2 OS=Homo sapiens OX=9606 GN=MAP2K2 PE=1 SV=1	1	5	2	2	2	0	0	0	0	5	0	0	0	0	0	0	2	0	0	0	0	0	0	2	0	14.5	6.5	6.5	44.424	400	400	0	5.3762	By matching					By MS/MS		5	0
P36542	P36542	5	5	5	ATP synthase subunit gamma, mitochondrial	ATP5C1	sp|P36542|ATPG_HUMAN ATP synthase subunit gamma, mitochondrial OS=Homo sapiens OX=9606 GN=ATP5F1C PE=1 SV=1	1	5	5	5	5	0	3	3	2	5	2	5	0	3	3	2	5	2	5	0	3	3	2	5	2	17.1	17.1	17.1	32.996	298	298	0	14.954	By MS/MS		By matching	By matching	By MS/MS	By MS/MS	By MS/MS	17.1	0
P36543;Q96A05	P36543;Q96A05	2;1	2;1	2;1	V-type proton ATPase subunit E 1;V-type proton ATPase subunit E 2	ATP6V1E1;ATP6V1E2	sp|P36543|VATE1_HUMAN V-type proton ATPase subunit E 1 OS=Homo sapiens OX=9606 GN=ATP6V1E1 PE=1 SV=1;sp|Q96A05|VATE2_HUMAN V-type proton ATPase subunit E 2 OS=Homo sapiens OX=9606 GN=ATP6V1E2 PE=1 SV=1	2	2	2	2	0	0	0	0	0	2	0	0	0	0	0	0	2	0	0	0	0	0	0	2	0	7.5	7.5	7.5	26.145	226	226;226	0.0053318	1.6192						By MS/MS		0	0
P36578	P36578	18	18	18	60S ribosomal protein L4	RPL4	sp|P36578|RL4_HUMAN 60S ribosomal protein L4 OS=Homo sapiens OX=9606 GN=RPL4 PE=1 SV=5	1	18	18	18	10	0	9	7	10	16	11	10	0	9	7	10	16	11	10	0	9	7	10	16	11	44.7	44.7	44.7	47.697	427	427	0	118.8	By MS/MS		By MS/MS	By MS/MS	By MS/MS	By MS/MS	By MS/MS	25.1	0
P36639	P36639	1	1	1	7,8-dihydro-8-oxoguanine triphosphatase	NUDT1	sp|P36639|8ODP_HUMAN 7,8-dihydro-8-oxoguanine triphosphatase OS=Homo sapiens OX=9606 GN=NUDT1 PE=1 SV=3	1	1	1	1	0	0	0	0	0	1	0	0	0	0	0	0	1	0	0	0	0	0	0	1	0	6.1	6.1	6.1	22.519	197	197	0.00064392	2.4021						By MS/MS		0	0
P36776	P36776	2	2	2	Lon protease homolog, mitochondrial	LONP1	sp|P36776|LONM_HUMAN Lon protease homolog, mitochondrial OS=Homo sapiens OX=9606 GN=LONP1 PE=1 SV=2	1	2	2	2	0	0	1	0	0	2	0	0	0	1	0	0	2	0	0	0	1	0	0	2	0	1.8	1.8	1.8	106.49	959	959	0	4.4813			By matching			By MS/MS		0	0
P36871	P36871	14	14	14	Phosphoglucomutase-1	PGM1	sp|P36871|PGM1_HUMAN Phosphoglucomutase-1 OS=Homo sapiens OX=9606 GN=PGM1 PE=1 SV=3	1	14	14	14	7	0	1	2	6	13	0	7	0	1	2	6	13	0	7	0	1	2	6	13	0	27.2	27.2	27.2	61.448	562	562	0	56.611	By MS/MS		By matching	By matching	By MS/MS	By MS/MS		14.4	0
P36873	P36873	11	2	2	Serine/threonine-protein phosphatase PP1-gamma catalytic subunit	PPP1CC	sp|P36873|PP1G_HUMAN Serine/threonine-protein phosphatase PP1-gamma catalytic subunit OS=Homo sapiens OX=9606 GN=PPP1CC PE=1 SV=1	1	11	2	2	8	0	0	0	4	4	1	1	0	0	0	0	1	0	1	0	0	0	0	1	0	45.5	7.4	7.4	36.983	323	323	0	8.904	By MS/MS				By matching	By MS/MS	By matching	35.3	0
P36952	P36952	18	18	18	Serpin B5	SERPINB5	sp|P36952|SPB5_HUMAN Serpin B5 OS=Homo sapiens OX=9606 GN=SERPINB5 PE=1 SV=2	1	18	18	18	15	0	6	8	12	13	4	15	0	6	8	12	13	4	15	0	6	8	12	13	4	63.5	63.5	63.5	42.1	375	375	0	74.811	By MS/MS		By matching	By matching	By MS/MS	By MS/MS	By MS/MS	50.7	0
P36957	P36957	5	5	5	Dihydrolipoyllysine-residue succinyltransferase component of 2-oxoglutarate dehydrogenase complex, mitochondrial	DLST	sp|P36957|ODO2_HUMAN Dihydrolipoyllysine-residue succinyltransferase component of 2-oxoglutarate dehydrogenase complex, mitochondrial OS=Homo sapiens OX=9606 GN=DLST PE=1 SV=4	1	5	5	5	1	0	0	0	1	4	0	1	0	0	0	1	4	0	1	0	0	0	1	4	0	10.8	10.8	10.8	48.755	453	453	0	21.046	By matching				By MS/MS	By MS/MS		1.5	0
P37108	P37108	8	8	8	Signal recognition particle 14 kDa protein	SRP14	sp|P37108|SRP14_HUMAN Signal recognition particle 14 kDa protein OS=Homo sapiens OX=9606 GN=SRP14 PE=1 SV=2	1	8	8	8	5	0	3	3	2	7	1	5	0	3	3	2	7	1	5	0	3	3	2	7	1	67.6	67.6	67.6	14.57	136	136	0	49.232	By MS/MS		By MS/MS	By MS/MS	By MS/MS	By MS/MS	By matching	54.4	0
P37198	P37198	2	2	2	Nuclear pore glycoprotein p62	NUP62	sp|P37198|NUP62_HUMAN Nuclear pore glycoprotein p62 OS=Homo sapiens OX=9606 GN=NUP62 PE=1 SV=3	1	2	2	2	1	0	0	0	1	1	0	1	0	0	0	1	1	0	1	0	0	0	1	1	0	5.2	5.2	5.2	53.254	522	522	0.00067522	2.8661	By MS/MS				By matching	By MS/MS		1.9	0
P37235;P84074;P61601	P37235;P84074;P61601	2;1;1	2;1;1	2;1;1	Hippocalcin-like protein 1;Neuron-specific calcium-binding protein hippocalcin;Neurocalcin-delta	HPCAL1;HPCA;NCALD	sp|P37235|HPCL1_HUMAN Hippocalcin-like protein 1 OS=Homo sapiens OX=9606 GN=HPCAL1 PE=1 SV=3;sp|P84074|HPCA_HUMAN Neuron-specific calcium-binding protein hippocalcin OS=Homo sapiens OX=9606 GN=HPCA PE=1 SV=2;sp|P61601|NCALD_HUMAN Neurocalcin-delta OS=Homo	3	2	2	2	1	0	0	0	0	2	0	1	0	0	0	0	2	0	1	0	0	0	0	2	0	9.3	9.3	9.3	22.313	193	193;193;193	0	5.8461	By MS/MS					By MS/MS		5.2	0
P37802;Q9UI15	P37802	17;1	17;1	17;1	Transgelin-2	TAGLN2	sp|P37802|TAGL2_HUMAN Transgelin-2 OS=Homo sapiens OX=9606 GN=TAGLN2 PE=1 SV=3	2	17	17	17	15	0	9	9	12	14	10	15	0	9	9	12	14	10	15	0	9	9	12	14	10	88.9	88.9	88.9	22.391	199	199;199	0	283.56	By MS/MS		By MS/MS	By MS/MS	By MS/MS	By MS/MS	By MS/MS	85.4	0
P37837	P37837	16	16	16	Transaldolase	TALDO1	sp|P37837|TALDO_HUMAN Transaldolase OS=Homo sapiens OX=9606 GN=TALDO1 PE=1 SV=2	1	16	16	16	7	0	3	2	8	13	5	7	0	3	2	8	13	5	7	0	3	2	8	13	5	43.9	43.9	43.9	37.54	337	337	0	52.531	By MS/MS		By matching	By matching	By MS/MS	By MS/MS	By MS/MS	22	0
P38117	P38117	3	3	3	Electron transfer flavoprotein subunit beta	ETFB	sp|P38117|ETFB_HUMAN Electron transfer flavoprotein subunit beta OS=Homo sapiens OX=9606 GN=ETFB PE=1 SV=3	1	3	3	3	3	0	2	3	3	2	1	3	0	2	3	3	2	1	3	0	2	3	3	2	1	14.1	14.1	14.1	27.843	255	255	0	9.2213	By MS/MS		By matching	By matching	By matching	By MS/MS	By matching	14.1	0
P38159;Q96E39;O75526;Q8IZ40;Q8N7X1	P38159;Q96E39	15;8;2;1;1	15;8;2;1;1	15;8;2;1;1	RNA-binding motif protein, X chromosome;RNA-binding motif protein, X chromosome, N-terminally processed;RNA binding motif protein, X-linked-like-1	RBMX;RBMXL1	sp|P38159|RBMX_HUMAN RNA-binding motif protein, X chromosome OS=Homo sapiens OX=9606 GN=RBMX PE=1 SV=3;sp|Q96E39|RMXL1_HUMAN RNA binding motif protein, X-linked-like-1 OS=Homo sapiens OX=9606 GN=RBMXL1 PE=1 SV=1	5	15	15	15	9	0	9	9	7	13	5	9	0	9	9	7	13	5	9	0	9	9	7	13	5	32.7	32.7	32.7	42.331	391	391;390;392;523;1067	0	52.128	By MS/MS		By MS/MS	By MS/MS	By MS/MS	By MS/MS	By MS/MS	22	0
P38606	P38606	7	7	7	V-type proton ATPase catalytic subunit A	ATP6V1A	sp|P38606|VATA_HUMAN V-type proton ATPase catalytic subunit A OS=Homo sapiens OX=9606 GN=ATP6V1A PE=1 SV=2	1	7	7	7	4	0	1	2	3	6	0	4	0	1	2	3	6	0	4	0	1	2	3	6	0	13.5	13.5	13.5	68.303	617	617	0	13.459	By MS/MS		By matching	By matching	By MS/MS	By MS/MS		8.3	0
P38646	P38646	32	32	32	Stress-70 protein, mitochondrial	HSPA9	sp|P38646|GRP75_HUMAN Stress-70 protein, mitochondrial OS=Homo sapiens OX=9606 GN=HSPA9 PE=1 SV=2	1	32	32	32	23	0	16	16	20	29	13	23	0	16	16	20	29	13	23	0	16	16	20	29	13	57.3	57.3	57.3	73.68	679	679	0	222.98	By MS/MS		By MS/MS	By MS/MS	By MS/MS	By MS/MS	By MS/MS	43	0
P38919	P38919	14	11	11	Eukaryotic initiation factor 4A-III;Eukaryotic initiation factor 4A-III, N-terminally processed	EIF4A3	sp|P38919|IF4A3_HUMAN Eukaryotic initiation factor 4A-III OS=Homo sapiens OX=9606 GN=EIF4A3 PE=1 SV=4	1	14	11	11	9	0	4	7	5	13	4	8	0	3	6	4	10	3	8	0	3	6	4	10	3	29	23.4	23.4	46.871	411	411	0	40.866	By MS/MS		By matching	By matching	By matching	By MS/MS	By matching	20	0
P39019	P39019	9	9	9	40S ribosomal protein S19	RPS19	sp|P39019|RS19_HUMAN 40S ribosomal protein S19 OS=Homo sapiens OX=9606 GN=RPS19 PE=1 SV=2	1	9	9	9	6	0	3	3	4	8	3	6	0	3	3	4	8	3	6	0	3	3	4	8	3	45.5	45.5	45.5	16.06	145	145	0	16.559	By MS/MS		By MS/MS	By MS/MS	By MS/MS	By MS/MS	By MS/MS	32.4	0
P39023;Q92901	P39023	15;2	15;2	15;2	60S ribosomal protein L3	RPL3	sp|P39023|RL3_HUMAN 60S ribosomal protein L3 OS=Homo sapiens OX=9606 GN=RPL3 PE=1 SV=2	2	15	15	15	14	0	9	6	7	13	7	14	0	9	6	7	13	7	14	0	9	6	7	13	7	41.7	41.7	41.7	46.108	403	403;407	0	68.764	By MS/MS		By MS/MS	By MS/MS	By MS/MS	By MS/MS	By MS/MS	41.4	0
P39656	P39656	3	3	3	Dolichyl-diphosphooligosaccharide--protein glycosyltransferase 48 kDa subunit	DDOST	sp|P39656|OST48_HUMAN Dolichyl-diphosphooligosaccharide--protein glycosyltransferase 48 kDa subunit OS=Homo sapiens OX=9606 GN=DDOST PE=1 SV=4	1	3	3	3	3	0	1	2	2	1	1	3	0	1	2	2	1	1	3	0	1	2	2	1	1	10.7	10.7	10.7	50.8	456	456	0	25.123	By MS/MS		By matching	By matching	By MS/MS	By MS/MS	By matching	10.7	0
P39687;O95626;O43423	P39687	8;2;2	8;2;2	7;2;2	Acidic leucine-rich nuclear phosphoprotein 32 family member A	ANP32A	sp|P39687|AN32A_HUMAN Acidic leucine-rich nuclear phosphoprotein 32 family member A OS=Homo sapiens OX=9606 GN=ANP32A PE=1 SV=1	3	8	8	7	4	0	4	4	2	6	3	4	0	4	4	2	6	3	4	0	4	4	2	5	3	28.1	28.1	28.1	28.585	249	249;131;234	0	63.945	By MS/MS		By MS/MS	By MS/MS	By MS/MS	By MS/MS	By MS/MS	15.3	0
P39748;REV__Q6DKJ4	P39748	8;1	8;1	8;1	Flap endonuclease 1	FEN1	sp|P39748|FEN1_HUMAN Flap endonuclease 1 OS=Homo sapiens OX=9606 GN=FEN1 PE=1 SV=1	2	8	8	8	2	0	1	1	1	8	1	2	0	1	1	1	8	1	2	0	1	1	1	8	1	20.8	20.8	20.8	42.592	380	380;435	0	31.754	By MS/MS		By MS/MS	By matching	By MS/MS	By MS/MS	By matching	7.1	0
P40121	P40121	8	8	8	Macrophage-capping protein	CAPG	sp|P40121|CAPG_HUMAN Macrophage-capping protein OS=Homo sapiens OX=9606 GN=CAPG PE=1 SV=2	1	8	8	8	7	0	3	2	4	7	1	7	0	3	2	4	7	1	7	0	3	2	4	7	1	29.3	29.3	29.3	38.498	348	348	0	27.657	By MS/MS		By matching	By matching	By MS/MS	By MS/MS	By matching	26.1	0
P40222;Q9NUQ3;Q8N3L3	P40222	9;1;1	9;1;1	9;1;1	Alpha-taxilin	TXLNA	sp|P40222|TXLNA_HUMAN Alpha-taxilin OS=Homo sapiens OX=9606 GN=TXLNA PE=1 SV=3	3	9	9	9	2	0	0	0	1	9	0	2	0	0	0	1	9	0	2	0	0	0	1	9	0	19	19	19	61.89	546	546;528;684	0	10.364	By MS/MS				By matching	By MS/MS		4.4	0
P40227;Q92526	P40227	20;5	20;5	20;5	T-complex protein 1 subunit zeta	CCT6A	sp|P40227|TCPZ_HUMAN T-complex protein 1 subunit zeta OS=Homo sapiens OX=9606 GN=CCT6A PE=1 SV=3	2	20	20	20	16	0	11	12	13	17	10	16	0	11	12	13	17	10	16	0	11	12	13	17	10	44.4	44.4	44.4	58.024	531	531;530	0	121.99	By MS/MS		By matching	By matching	By MS/MS	By MS/MS	By MS/MS	36.7	0
P40261	P40261	1	1	1	Nicotinamide N-methyltransferase	NNMT	sp|P40261|NNMT_HUMAN Nicotinamide N-methyltransferase OS=Homo sapiens OX=9606 GN=NNMT PE=1 SV=1	1	1	1	1	1	0	0	0	1	1	1	1	0	0	0	1	1	1	1	0	0	0	1	1	1	3	3	3	29.574	264	264	0.0041992	1.7166	By MS/MS				By MS/MS	By MS/MS	By matching	3	0
P40429;Q6NVV1	P40429;Q6NVV1	7;4	7;4	7;4	60S ribosomal protein L13a;Putative 60S ribosomal protein L13a protein RPL13AP3	RPL13A;RPL13AP3	sp|P40429|RL13A_HUMAN 60S ribosomal protein L13a OS=Homo sapiens OX=9606 GN=RPL13A PE=1 SV=2;sp|Q6NVV1|R13P3_HUMAN Putative 60S ribosomal protein L13a protein RPL13AP3 OS=Homo sapiens OX=9606 GN=RPL13AP3 PE=5 SV=1	2	7	7	7	4	0	3	2	4	7	2	4	0	3	2	4	7	2	4	0	3	2	4	7	2	28.1	28.1	28.1	23.577	203	203;102	0	17.306	By MS/MS		By MS/MS	By MS/MS	By MS/MS	By MS/MS	By MS/MS	19.7	0
P40763	P40763	3	3	3	Signal transducer and activator of transcription 3	STAT3	sp|P40763|STAT3_HUMAN Signal transducer and activator of transcription 3 OS=Homo sapiens OX=9606 GN=STAT3 PE=1 SV=2	1	3	3	3	1	0	0	1	1	3	0	1	0	0	1	1	3	0	1	0	0	1	1	3	0	5.2	5.2	5.2	88.067	770	770	0	7.513	By MS/MS			By matching	By matching	By MS/MS		3.4	0
P40879	P40879	1	1	1	Chloride anion exchanger	SLC26A3	sp|P40879|S26A3_HUMAN Chloride anion exchanger OS=Homo sapiens OX=9606 GN=SLC26A3 PE=1 SV=1	1	1	1	1	0	0	0	0	0	1	0	0	0	0	0	0	1	0	0	0	0	0	0	1	0	1.4	1.4	1.4	84.504	764	764	1	-2						By MS/MS		0	0
P40925	P40925	9	9	9	Malate dehydrogenase, cytoplasmic	MDH1	sp|P40925|MDHC_HUMAN Malate dehydrogenase, cytoplasmic OS=Homo sapiens OX=9606 GN=MDH1 PE=1 SV=4	1	9	9	9	9	0	6	3	8	8	3	9	0	6	3	8	8	3	9	0	6	3	8	8	3	30.2	30.2	30.2	36.426	334	334	0	38.621	By MS/MS		By MS/MS	By MS/MS	By MS/MS	By MS/MS	By MS/MS	30.2	0
P40926	P40926	15	15	15	Malate dehydrogenase, mitochondrial	MDH2	sp|P40926|MDHM_HUMAN Malate dehydrogenase, mitochondrial OS=Homo sapiens OX=9606 GN=MDH2 PE=1 SV=3	1	15	15	15	13	0	11	11	12	14	10	13	0	11	11	12	14	10	13	0	11	11	12	14	10	56.2	56.2	56.2	35.503	338	338	0	150.92	By MS/MS		By MS/MS	By MS/MS	By MS/MS	By MS/MS	By MS/MS	51.2	0
P40938	P40938	1	1	1	Replication factor C subunit 3	RFC3	sp|P40938|RFC3_HUMAN Replication factor C subunit 3 OS=Homo sapiens OX=9606 GN=RFC3 PE=1 SV=2	1	1	1	1	0	0	0	0	0	1	0	0	0	0	0	0	1	0	0	0	0	0	0	1	0	3.9	3.9	3.9	40.556	356	356	0	8.7719						By MS/MS		0	0
P40939	P40939	8	8	8	Trifunctional enzyme subunit alpha, mitochondrial;Long-chain enoyl-CoA hydratase;Long chain 3-hydroxyacyl-CoA dehydrogenase	HADHA	sp|P40939|ECHA_HUMAN Trifunctional enzyme subunit alpha, mitochondrial OS=Homo sapiens OX=9606 GN=HADHA PE=1 SV=2	1	8	8	8	4	0	1	0	2	7	0	4	0	1	0	2	7	0	4	0	1	0	2	7	0	10	10	10	82.999	763	763	0	17.45	By MS/MS		By matching		By matching	By MS/MS		5	0
P41091;Q2VIR3	P41091;Q2VIR3	15;12	15;12	15;12	Eukaryotic translation initiation factor 2 subunit 3;Putative eukaryotic translation initiation factor 2 subunit 3-like protein	EIF2S3;EIF2S3L	sp|P41091|IF2G_HUMAN Eukaryotic translation initiation factor 2 subunit 3 OS=Homo sapiens OX=9606 GN=EIF2S3 PE=1 SV=3;sp|Q2VIR3|IF2GL_HUMAN Eukaryotic translation initiation factor 2 subunit 3B OS=Homo sapiens OX=9606 GN=EIF2S3B PE=2 SV=2	2	15	15	15	14	0	8	9	10	12	4	14	0	8	9	10	12	4	14	0	8	9	10	12	4	42.4	42.4	42.4	51.109	472	472;472	0	69.541	By MS/MS		By MS/MS	By MS/MS	By MS/MS	By MS/MS	By MS/MS	40.7	0
P41227;Q9BSU3	P41227	6;2	6;2	6;2	N-alpha-acetyltransferase 10	NAA10	sp|P41227|NAA10_HUMAN N-alpha-acetyltransferase 10 OS=Homo sapiens OX=9606 GN=NAA10 PE=1 SV=1	2	6	6	6	2	0	0	0	1	6	0	2	0	0	0	1	6	0	2	0	0	0	1	6	0	27.2	27.2	27.2	26.458	235	235;229	0	16.119	By MS/MS				By matching	By MS/MS		7.2	0
P41250	P41250	13	13	13	Glycine--tRNA ligase	GARS	sp|P41250|GARS_HUMAN Glycine--tRNA ligase OS=Homo sapiens OX=9606 GN=GARS PE=1 SV=3	1	13	13	13	8	0	2	4	6	13	1	8	0	2	4	6	13	1	8	0	2	4	6	13	1	17.5	17.5	17.5	83.165	739	739	0	64.671	By MS/MS		By matching	By matching	By matching	By MS/MS	By matching	11.4	0
P41252	P41252	13	13	13	Isoleucine--tRNA ligase, cytoplasmic	IARS	sp|P41252|SYIC_HUMAN Isoleucine--tRNA ligase, cytoplasmic OS=Homo sapiens OX=9606 GN=IARS PE=1 SV=2	1	13	13	13	8	0	3	2	5	10	1	8	0	3	2	5	10	1	8	0	3	2	5	10	1	10.5	10.5	10.5	144.5	1262	1262	0	28.676	By MS/MS		By matching	By matching	By matching	By MS/MS	By matching	7.1	0
P41567;O60739	P41567;O60739	5;3	5;3	5;3	Eukaryotic translation initiation factor 1;Eukaryotic translation initiation factor 1b	EIF1;EIF1B	sp|P41567|EIF1_HUMAN Eukaryotic translation initiation factor 1 OS=Homo sapiens OX=9606 GN=EIF1 PE=1 SV=1;sp|O60739|EIF1B_HUMAN Eukaryotic translation initiation factor 1b OS=Homo sapiens OX=9606 GN=EIF1B PE=1 SV=2	2	5	5	5	3	0	1	2	2	3	0	3	0	1	2	2	3	0	3	0	1	2	2	3	0	74.3	74.3	74.3	12.732	113	113;113	0	34.634	By MS/MS		By matching	By matching	By matching	By MS/MS		40.7	0
P42166	P42166	10	10	4	Lamina-associated polypeptide 2, isoform alpha;Thymopoietin;Thymopentin	TMPO	sp|P42166|LAP2A_HUMAN Lamina-associated polypeptide 2, isoform alpha OS=Homo sapiens OX=9606 GN=TMPO PE=1 SV=2	1	10	10	4	8	0	2	3	6	6	0	8	0	2	3	6	6	0	3	0	0	0	2	1	0	19.6	19.6	5.9	75.491	694	694	0	42.396	By MS/MS		By matching	By matching	By MS/MS	By MS/MS		14.3	0
P42167	P42167	9	3	3	Lamina-associated polypeptide 2, isoforms beta/gamma;Thymopoietin;Thymopentin	TMPO	sp|P42167|LAP2B_HUMAN Lamina-associated polypeptide 2, isoforms beta/gamma OS=Homo sapiens OX=9606 GN=TMPO PE=1 SV=2	1	9	3	3	6	0	3	4	5	8	0	1	0	1	1	1	3	0	1	0	1	1	1	3	0	29.1	8.1	8.1	50.67	454	454	0	13.036	By MS/MS		By matching	By matching	By matching	By MS/MS		18.1	0
P42224	P42224	3	3	3	Signal transducer and activator of transcription 1-alpha/beta	STAT1	sp|P42224|STAT1_HUMAN Signal transducer and activator of transcription 1-alpha/beta OS=Homo sapiens OX=9606 GN=STAT1 PE=1 SV=2	1	3	3	3	0	0	0	0	0	3	0	0	0	0	0	0	3	0	0	0	0	0	0	3	0	4.4	4.4	4.4	87.334	750	750	0	8.0158						By MS/MS		0	0
P42330;P17516	P42330	14;5	6;0	6;0	Aldo-keto reductase family 1 member C3	AKR1C3	sp|P42330|AK1C3_HUMAN Aldo-keto reductase family 1 member C3 OS=Homo sapiens OX=9606 GN=AKR1C3 PE=1 SV=4	2	14	6	6	12	0	6	7	13	10	5	5	0	0	1	5	4	3	5	0	0	1	5	4	3	44.6	25.1	25.1	36.853	323	323;323	0	42.624	By MS/MS		By matching	By matching	By MS/MS	By MS/MS	By MS/MS	37.8	0
P42677;Q71UM5	P42677;Q71UM5	4;3	4;3	4;3	40S ribosomal protein S27;40S ribosomal protein S27-like	RPS27;RPS27L	sp|P42677|RS27_HUMAN 40S ribosomal protein S27 OS=Homo sapiens OX=9606 GN=RPS27 PE=1 SV=3;sp|Q71UM5|RS27L_HUMAN 40S ribosomal protein S27-like OS=Homo sapiens OX=9606 GN=RPS27L PE=1 SV=3	2	4	4	4	2	0	2	2	2	4	1	2	0	2	2	2	4	1	2	0	2	2	2	4	1	39.3	39.3	39.3	9.461	84	84;84	0	18.49	By MS/MS		By MS/MS	By MS/MS	By MS/MS	By MS/MS	By MS/MS	22.6	0
P42704	P42704	22	22	22	Leucine-rich PPR motif-containing protein, mitochondrial	LRPPRC	sp|P42704|LPPRC_HUMAN Leucine-rich PPR motif-containing protein, mitochondrial OS=Homo sapiens OX=9606 GN=LRPPRC PE=1 SV=3	1	22	22	22	13	0	2	2	6	17	2	13	0	2	2	6	17	2	13	0	2	2	6	17	2	16.5	16.5	16.5	157.9	1394	1394	0	56.615	By MS/MS		By matching	By matching	By MS/MS	By MS/MS	By matching	10.1	0
P42765	P42765	8	8	8	3-ketoacyl-CoA thiolase, mitochondrial	ACAA2	sp|P42765|THIM_HUMAN 3-ketoacyl-CoA thiolase, mitochondrial OS=Homo sapiens OX=9606 GN=ACAA2 PE=1 SV=2	1	8	8	8	6	0	1	3	6	7	4	6	0	1	3	6	7	4	6	0	1	3	6	7	4	21.9	21.9	21.9	41.924	397	397	0	17.66	By MS/MS		By matching	By matching	By MS/MS	By MS/MS	By matching	16.6	0
P42766	P42766	4	4	4	60S ribosomal protein L35	RPL35	sp|P42766|RL35_HUMAN 60S ribosomal protein L35 OS=Homo sapiens OX=9606 GN=RPL35 PE=1 SV=2	1	4	4	4	1	1	1	1	1	4	2	1	1	1	1	1	4	2	1	1	1	1	1	4	2	26	26	26	14.551	123	123	0	14.931	By MS/MS	By matching	By MS/MS	By MS/MS	By MS/MS	By MS/MS	By MS/MS	8.1	5.7
P42771;P42772	P42771;P42772	5;3	5;3	5;3	Cyclin-dependent kinase inhibitor 2A;Cyclin-dependent kinase 4 inhibitor B	CDKN2A;CDKN2B	sp|P42771|CDN2A_HUMAN Cyclin-dependent kinase inhibitor 2A OS=Homo sapiens OX=9606 GN=CDKN2A PE=1 SV=2;sp|P42772|CDN2B_HUMAN Cyclin-dependent kinase 4 inhibitor B OS=Homo sapiens OX=9606 GN=CDKN2B PE=1 SV=1	2	5	5	5	5	0	1	3	4	3	1	5	0	1	3	4	3	1	5	0	1	3	4	3	1	44.9	44.9	44.9	16.532	156	156;138	0	150.12	By MS/MS		By matching	By MS/MS	By MS/MS	By MS/MS	By MS/MS	44.9	0
P43034	P43034	11	11	11	Platelet-activating factor acetylhydrolase IB subunit alpha	PAFAH1B1	sp|P43034|LIS1_HUMAN Platelet-activating factor acetylhydrolase IB subunit alpha OS=Homo sapiens OX=9606 GN=PAFAH1B1 PE=1 SV=2	1	11	11	11	3	0	1	2	2	11	1	3	0	1	2	2	11	1	3	0	1	2	2	11	1	33.7	33.7	33.7	46.637	410	410	0	34.886	By MS/MS		By matching	By matching	By matching	By MS/MS	By MS/MS	9.3	0
P43243	P43243	22	22	22	Matrin-3	MATR3	sp|P43243|MATR3_HUMAN Matrin-3 OS=Homo sapiens OX=9606 GN=MATR3 PE=1 SV=2	1	22	22	22	12	0	6	6	5	19	3	12	0	6	6	5	19	3	12	0	6	6	5	19	3	32	32	32	94.622	847	847	0	190.92	By MS/MS		By MS/MS	By MS/MS	By matching	By MS/MS	By matching	20	0
P43246	P43246	2	2	2	DNA mismatch repair protein Msh2	MSH2	sp|P43246|MSH2_HUMAN DNA mismatch repair protein Msh2 OS=Homo sapiens OX=9606 GN=MSH2 PE=1 SV=1	1	2	2	2	0	0	0	0	0	2	0	0	0	0	0	0	2	0	0	0	0	0	0	2	0	2.7	2.7	2.7	104.74	934	934	0.0012523	2.1302						By MS/MS		0	0
P43307	P43307	3	3	3	Translocon-associated protein subunit alpha	SSR1	sp|P43307|SSRA_HUMAN Translocon-associated protein subunit alpha OS=Homo sapiens OX=9606 GN=SSR1 PE=1 SV=3	1	3	3	3	2	0	1	1	2	2	1	2	0	1	1	2	2	1	2	0	1	1	2	2	1	11.9	11.9	11.9	32.235	286	286	0	5.4123	By MS/MS		By matching	By matching	By MS/MS	By MS/MS	By matching	8	0
P43487;Q9C010	P43487	5;1	5;1	5;1	Ran-specific GTPase-activating protein	RANBP1	sp|P43487|RANG_HUMAN Ran-specific GTPase-activating protein OS=Homo sapiens OX=9606 GN=RANBP1 PE=1 SV=1	2	5	5	5	3	0	1	1	2	5	2	3	0	1	1	2	5	2	3	0	1	1	2	5	2	32.3	32.3	32.3	23.31	201	201;78	0	11.049	By MS/MS		By matching	By matching	By MS/MS	By MS/MS	By MS/MS	26.9	0
P43490	P43490	8	8	8	Nicotinamide phosphoribosyltransferase	NAMPT	sp|P43490|NAMPT_HUMAN Nicotinamide phosphoribosyltransferase OS=Homo sapiens OX=9606 GN=NAMPT PE=1 SV=1	1	8	8	8	4	0	0	1	3	4	0	4	0	0	1	3	4	0	4	0	0	1	3	4	0	17.3	17.3	17.3	55.52	491	491	0	10.141	By MS/MS			By matching	By matching	By MS/MS		10.8	0
P43686	P43686	9	9	9	26S protease regulatory subunit 6B	PSMC4	sp|P43686|PRS6B_HUMAN 26S proteasome regulatory subunit 6B OS=Homo sapiens OX=9606 GN=PSMC4 PE=1 SV=2	1	9	9	9	8	0	1	3	6	8	1	8	0	1	3	6	8	1	8	0	1	3	6	8	1	25.4	25.4	25.4	47.366	418	418	0	19.51	By MS/MS		By matching	By matching	By MS/MS	By MS/MS	By matching	23	0
P43897	P43897	2	2	2	Elongation factor Ts, mitochondrial	TSFM	sp|P43897|EFTS_HUMAN Elongation factor Ts, mitochondrial OS=Homo sapiens OX=9606 GN=TSFM PE=1 SV=2	1	2	2	2	1	0	0	0	1	1	0	1	0	0	0	1	1	0	1	0	0	0	1	1	0	8.3	8.3	8.3	35.39	325	325	0	3.9358	By MS/MS				By matching	By MS/MS		5.2	0
P45880	P45880	8	8	8	Voltage-dependent anion-selective channel protein 2	VDAC2	sp|P45880|VDAC2_HUMAN Voltage-dependent anion-selective channel protein 2 OS=Homo sapiens OX=9606 GN=VDAC2 PE=1 SV=2	1	8	8	8	5	0	5	5	6	7	4	5	0	5	5	6	7	4	5	0	5	5	6	7	4	31	31	31	31.566	294	294	0	44.077	By MS/MS		By MS/MS	By MS/MS	By MS/MS	By MS/MS	By MS/MS	15	0
P45973	P45973	2	2	2	Chromobox protein homolog 5	CBX5	sp|P45973|CBX5_HUMAN Chromobox protein homolog 5 OS=Homo sapiens OX=9606 GN=CBX5 PE=1 SV=1	1	2	2	2	1	0	1	1	1	2	0	1	0	1	1	1	2	0	1	0	1	1	1	2	0	13.6	13.6	13.6	22.225	191	191	0	4.4105	By MS/MS		By matching	By matching	By matching	By MS/MS		5.8	0
P45974;Q8IWA5	P45974	11;1	11;1	11;1	Ubiquitin carboxyl-terminal hydrolase 5	USP5	sp|P45974|UBP5_HUMAN Ubiquitin carboxyl-terminal hydrolase 5 OS=Homo sapiens OX=9606 GN=USP5 PE=1 SV=2	2	11	11	11	6	0	0	1	3	8	0	6	0	0	1	3	8	0	6	0	0	1	3	8	0	18.2	18.2	18.2	95.785	858	858;706	0	62.105	By MS/MS			By matching	By matching	By MS/MS		9.8	0
P46060	P46060	16	16	16	Ran GTPase-activating protein 1	RANGAP1	sp|P46060|RAGP1_HUMAN Ran GTPase-activating protein 1 OS=Homo sapiens OX=9606 GN=RANGAP1 PE=1 SV=1	1	16	16	16	12	0	1	2	8	10	0	12	0	1	2	8	10	0	12	0	1	2	8	10	0	32	32	32	63.541	587	587	0	56.103	By MS/MS		By matching	By matching	By MS/MS	By MS/MS		24	0
P46063	P46063	4	4	4	ATP-dependent DNA helicase Q1	RECQL	sp|P46063|RECQ1_HUMAN ATP-dependent DNA helicase Q1 OS=Homo sapiens OX=9606 GN=RECQL PE=1 SV=3	1	4	4	4	0	0	0	0	0	4	1	0	0	0	0	0	4	1	0	0	0	0	0	4	1	9.4	9.4	9.4	73.457	649	649	0	7.8165						By MS/MS	By matching	0	0
P46087	P46087	9	9	9	Probable 28S rRNA (cytosine(4447)-C(5))-methyltransferase	NOP2	sp|P46087|NOP2_HUMAN Probable 28S rRNA (cytosine(4447)-C(5))-methyltransferase OS=Homo sapiens OX=9606 GN=NOP2 PE=1 SV=2	1	9	9	9	6	1	4	5	4	6	0	6	1	4	5	4	6	0	6	1	4	5	4	6	0	12.9	12.9	12.9	89.301	812	812	0	21.737	By MS/MS	By matching	By matching	By matching	By matching	By MS/MS		9.6	1
P46108	P46108	2	2	2	Adapter molecule crk	CRK	sp|P46108|CRK_HUMAN Adapter molecule crk OS=Homo sapiens OX=9606 GN=CRK PE=1 SV=2	1	2	2	2	1	0	0	0	0	2	0	1	0	0	0	0	2	0	1	0	0	0	0	2	0	6.2	6.2	6.2	33.83	304	304	0	3.5495	By MS/MS					By MS/MS		3.6	0
P46459	P46459	5	5	5	Vesicle-fusing ATPase	NSF	sp|P46459|NSF_HUMAN Vesicle-fusing ATPase OS=Homo sapiens OX=9606 GN=NSF PE=1 SV=3	1	5	5	5	3	0	0	2	1	3	0	3	0	0	2	1	3	0	3	0	0	2	1	3	0	7.8	7.8	7.8	82.593	744	744	0	10.313	By MS/MS			By matching	By matching	By MS/MS		4.4	0
P46776	P46776	6	6	6	60S ribosomal protein L27a	RPL27A	sp|P46776|RL27A_HUMAN 60S ribosomal protein L27a OS=Homo sapiens OX=9606 GN=RPL27A PE=1 SV=2	1	6	6	6	5	0	5	4	5	6	2	5	0	5	4	5	6	2	5	0	5	4	5	6	2	35.1	35.1	35.1	16.561	148	148	0	23.004	By MS/MS		By MS/MS	By MS/MS	By MS/MS	By MS/MS	By MS/MS	28.4	0
P46777	P46777	13	13	13	60S ribosomal protein L5	RPL5	sp|P46777|RL5_HUMAN 60S ribosomal protein L5 OS=Homo sapiens OX=9606 GN=RPL5 PE=1 SV=3	1	13	13	13	7	0	7	6	6	12	7	7	0	7	6	6	12	7	7	0	7	6	6	12	7	43.4	43.4	43.4	34.362	297	297	0	60.307	By MS/MS		By MS/MS	By MS/MS	By MS/MS	By MS/MS	By MS/MS	22.9	0
P46778	P46778	4	4	4	60S ribosomal protein L21	RPL21	sp|P46778|RL21_HUMAN 60S ribosomal protein L21 OS=Homo sapiens OX=9606 GN=RPL21 PE=1 SV=2	1	4	4	4	2	0	1	1	2	3	3	2	0	1	1	2	3	3	2	0	1	1	2	3	3	25	25	25	18.565	160	160	0	19.528	By MS/MS		By MS/MS	By MS/MS	By MS/MS	By MS/MS	By MS/MS	13.8	0
P46779	P46779	6	6	6	60S ribosomal protein L28	RPL28	sp|P46779|RL28_HUMAN 60S ribosomal protein L28 OS=Homo sapiens OX=9606 GN=RPL28 PE=1 SV=3	1	6	6	6	5	0	5	5	5	5	4	5	0	5	5	5	5	4	5	0	5	5	5	5	4	40.1	40.1	40.1	15.747	137	137	0	26.241	By MS/MS		By MS/MS	By MS/MS	By MS/MS	By MS/MS	By MS/MS	32.8	0
P46781	P46781	14	14	14	40S ribosomal protein S9	RPS9	sp|P46781|RS9_HUMAN 40S ribosomal protein S9 OS=Homo sapiens OX=9606 GN=RPS9 PE=1 SV=3	1	14	14	14	10	0	8	5	8	12	9	10	0	8	5	8	12	9	10	0	8	5	8	12	9	50	50	50	22.591	194	194	0	61.758	By MS/MS		By matching	By matching	By MS/MS	By MS/MS	By MS/MS	36.6	0
P46782	P46782	10	10	10	40S ribosomal protein S5;40S ribosomal protein S5, N-terminally processed	RPS5	sp|P46782|RS5_HUMAN 40S ribosomal protein S5 OS=Homo sapiens OX=9606 GN=RPS5 PE=1 SV=4	1	10	10	10	7	0	4	4	6	8	4	7	0	4	4	6	8	4	7	0	4	4	6	8	4	36.8	36.8	36.8	22.876	204	204	0	66.638	By MS/MS		By MS/MS	By MS/MS	By MS/MS	By MS/MS	By MS/MS	23.5	0
P46783;Q9NQ39	P46783	7;3	7;3	7;3	40S ribosomal protein S10	RPS10	sp|P46783|RS10_HUMAN 40S ribosomal protein S10 OS=Homo sapiens OX=9606 GN=RPS10 PE=1 SV=1	2	7	7	7	5	1	4	2	4	7	4	5	1	4	2	4	7	4	5	1	4	2	4	7	4	35.2	35.2	35.2	18.898	165	165;176	0	72.592	By MS/MS	By matching	By MS/MS	By MS/MS	By MS/MS	By MS/MS	By MS/MS	25.5	5.5
P46821;P78559;Q8IVG5;Q5K651	P46821	35;2;1;1	35;2;1;1	35;2;1;1	Microtubule-associated protein 1B;MAP1B heavy chain;MAP1 light chain LC1	MAP1B	sp|P46821|MAP1B_HUMAN Microtubule-associated protein 1B OS=Homo sapiens OX=9606 GN=MAP1B PE=1 SV=2	4	35	35	35	16	0	0	0	16	29	0	16	0	0	0	16	29	0	16	0	0	0	16	29	0	17.9	17.9	17.9	270.63	2468	2468;2803;1584;1589	0	99.004	By MS/MS				By MS/MS	By MS/MS		7.4	0
P46940;Q13576;Q86VI3	P46940	45;2;2	45;2;2	45;2;2	Ras GTPase-activating-like protein IQGAP1	IQGAP1	sp|P46940|IQGA1_HUMAN Ras GTPase-activating-like protein IQGAP1 OS=Homo sapiens OX=9606 GN=IQGAP1 PE=1 SV=1	3	45	45	45	30	0	14	18	20	36	13	30	0	14	18	20	36	13	30	0	14	18	20	36	13	33.3	33.3	33.3	189.25	1657	1657;1575;1631	0	281.68	By MS/MS		By matching	By MS/MS	By MS/MS	By MS/MS	By MS/MS	24.2	0
P46977	P46977	1	1	1	Dolichyl-diphosphooligosaccharide--protein glycosyltransferase subunit STT3A	STT3A	sp|P46977|STT3A_HUMAN Dolichyl-diphosphooligosaccharide--protein glycosyltransferase subunit STT3A OS=Homo sapiens OX=9606 GN=STT3A PE=1 SV=2	1	1	1	1	0	0	0	0	0	1	0	0	0	0	0	0	1	0	0	0	0	0	0	1	0	1.3	1.3	1.3	80.529	705	705	0.0091064	1.3607						By MS/MS		0	0
P47755	P47755	9	5	5	F-actin-capping protein subunit alpha-2	CAPZA2	sp|P47755|CAZA2_HUMAN F-actin-capping protein subunit alpha-2 OS=Homo sapiens OX=9606 GN=CAPZA2 PE=1 SV=3	1	9	5	5	7	0	3	5	6	5	2	4	0	1	3	4	2	1	4	0	1	3	4	2	1	43	29	29	32.949	286	286	0	17.4	By MS/MS		By matching	By matching	By MS/MS	By MS/MS	By matching	34.6	0
P47756	P47756	9	9	9	F-actin-capping protein subunit beta	CAPZB	sp|P47756|CAPZB_HUMAN F-actin-capping protein subunit beta OS=Homo sapiens OX=9606 GN=CAPZB PE=1 SV=4	1	9	9	9	6	0	5	5	5	8	4	6	0	5	5	5	8	4	6	0	5	5	5	8	4	38.3	38.3	38.3	31.35	277	277	0	52.552	By MS/MS		By MS/MS	By matching	By MS/MS	By MS/MS	By MS/MS	27.4	0
P47813;O14602	P47813;O14602	4;3	4;3	4;3	Eukaryotic translation initiation factor 1A, X-chromosomal;Eukaryotic translation initiation factor 1A, Y-chromosomal	EIF1AX;EIF1AY	sp|P47813|IF1AX_HUMAN Eukaryotic translation initiation factor 1A, X-chromosomal OS=Homo sapiens OX=9606 GN=EIF1AX PE=1 SV=2;sp|O14602|IF1AY_HUMAN Eukaryotic translation initiation factor 1A, Y-chromosomal OS=Homo sapiens OX=9606 GN=EIF1AY PE=1 SV=4	2	4	4	4	2	0	0	1	1	3	1	2	0	0	1	1	3	1	2	0	0	1	1	3	1	28.5	28.5	28.5	16.46	144	144;144	0	14.214	By MS/MS			By matching	By MS/MS	By MS/MS	By matching	16.7	0
P47897	P47897	16	16	16	Glutamine--tRNA ligase	QARS	sp|P47897|SYQ_HUMAN Glutamine--tRNA ligase OS=Homo sapiens OX=9606 GN=QARS PE=1 SV=1	1	16	16	16	9	1	2	1	5	11	0	9	1	2	1	5	11	0	9	1	2	1	5	11	0	23.6	23.6	23.6	87.798	775	775	0	60.299	By MS/MS	By matching	By matching	By matching	By matching	By MS/MS		13.7	1.2
P47914	P47914	2	2	2	60S ribosomal protein L29	RPL29	sp|P47914|RL29_HUMAN 60S ribosomal protein L29 OS=Homo sapiens OX=9606 GN=RPL29 PE=1 SV=2	1	2	2	2	2	0	2	2	2	2	2	2	0	2	2	2	2	2	2	0	2	2	2	2	2	14.5	14.5	14.5	17.752	159	159	0	11.212	By MS/MS		By MS/MS	By MS/MS	By MS/MS	By MS/MS	By MS/MS	14.5	0
P48047	P48047	7	7	7	ATP synthase subunit O, mitochondrial	ATP5O	sp|P48047|ATPO_HUMAN ATP synthase subunit O, mitochondrial OS=Homo sapiens OX=9606 GN=ATP5PO PE=1 SV=1	1	7	7	7	6	0	2	2	4	6	3	6	0	2	2	4	6	3	6	0	2	2	4	6	3	34.7	34.7	34.7	23.277	213	213	0	44.63	By MS/MS		By matching	By matching	By MS/MS	By MS/MS	By matching	30	0
P48059	P48059	4	4	2	LIM and senescent cell antigen-like-containing domain protein 1	LIMS1	sp|P48059|LIMS1_HUMAN LIM and senescent cell antigen-like-containing domain protein 1 OS=Homo sapiens OX=9606 GN=LIMS1 PE=1 SV=4	1	4	4	2	0	0	0	0	2	4	0	0	0	0	0	2	4	0	0	0	0	0	1	2	0	14.8	14.8	8.6	37.251	325	325	0	11.736					By MS/MS	By MS/MS		0	0
P48163	P48163	2	2	2	NADP-dependent malic enzyme	ME1	sp|P48163|MAOX_HUMAN NADP-dependent malic enzyme OS=Homo sapiens OX=9606 GN=ME1 PE=1 SV=1	1	2	2	2	1	0	0	0	1	2	0	1	0	0	0	1	2	0	1	0	0	0	1	2	0	3	3	3	64.149	572	572	0.00067431	2.8576	By MS/MS				By matching	By MS/MS		1.4	0
P48444	P48444	8	8	8	Coatomer subunit delta	ARCN1	sp|P48444|COPD_HUMAN Coatomer subunit delta OS=Homo sapiens OX=9606 GN=ARCN1 PE=1 SV=1	1	8	8	8	5	0	1	0	4	5	0	5	0	1	0	4	5	0	5	0	1	0	4	5	0	16	16	16	57.21	511	511	0	16.872	By MS/MS		By matching		By matching	By MS/MS		10.6	0
P48507	P48507	3	3	3	Glutamate--cysteine ligase regulatory subunit	GCLM	sp|P48507|GSH0_HUMAN Glutamate--cysteine ligase regulatory subunit OS=Homo sapiens OX=9606 GN=GCLM PE=1 SV=1	1	3	3	3	1	0	0	1	2	2	1	1	0	0	1	2	2	1	1	0	0	1	2	2	1	12.4	12.4	12.4	30.727	274	274	0	13.938	By MS/MS			By matching	By MS/MS	By MS/MS	By MS/MS	4.7	0
P48509	P48509	4	4	4	CD151 antigen	CD151	sp|P48509|CD151_HUMAN CD151 antigen OS=Homo sapiens OX=9606 GN=CD151 PE=1 SV=3	1	4	4	4	1	0	1	1	1	3	1	1	0	1	1	1	3	1	1	0	1	1	1	3	1	13.8	13.8	13.8	28.295	253	253	0	4.4648	By MS/MS		By matching	By matching	By MS/MS	By MS/MS	By matching	4	0
P48556	P48556	5	5	5	26S proteasome non-ATPase regulatory subunit 8	PSMD8	sp|P48556|PSMD8_HUMAN 26S proteasome non-ATPase regulatory subunit 8 OS=Homo sapiens OX=9606 GN=PSMD8 PE=1 SV=2	1	5	5	5	4	0	1	0	2	3	1	4	0	1	0	2	3	1	4	0	1	0	2	3	1	14	14	14	39.611	350	350	0	9.8117	By MS/MS		By matching		By matching	By MS/MS	By matching	11.7	0
P48637	P48637	3	3	3	Glutathione synthetase	GSS	sp|P48637|GSHB_HUMAN Glutathione synthetase OS=Homo sapiens OX=9606 GN=GSS PE=1 SV=1	1	3	3	3	3	0	0	0	1	1	0	3	0	0	0	1	1	0	3	0	0	0	1	1	0	7.6	7.6	7.6	52.384	474	474	0	5.7973	By MS/MS				By matching	By MS/MS		7.6	0
P48643	P48643	21	21	21	T-complex protein 1 subunit epsilon	CCT5	sp|P48643|TCPE_HUMAN T-complex protein 1 subunit epsilon OS=Homo sapiens OX=9606 GN=CCT5 PE=1 SV=1	1	21	21	21	14	0	10	10	12	17	10	14	0	10	10	12	17	10	14	0	10	10	12	17	10	38.1	38.1	38.1	59.67	541	541	0	138.86	By MS/MS		By matching	By matching	By MS/MS	By MS/MS	By MS/MS	26.1	0
P48739;Q00169	P48739	7;1	7;1	7;1	Phosphatidylinositol transfer protein beta isoform	PITPNB	sp|P48739|PIPNB_HUMAN Phosphatidylinositol transfer protein beta isoform OS=Homo sapiens OX=9606 GN=PITPNB PE=1 SV=2	2	7	7	7	2	0	0	0	0	7	0	2	0	0	0	0	7	0	2	0	0	0	0	7	0	26.6	26.6	26.6	31.54	271	271;270	0	13.211	By MS/MS					By MS/MS		7.4	0
P48960	P48960	2	2	2	CD97 antigen;CD97 antigen subunit alpha;CD97 antigen subunit beta	CD97	sp|P48960|CD97_HUMAN CD97 antigen OS=Homo sapiens OX=9606 GN=CD97 PE=1 SV=4	1	2	2	2	1	0	0	0	0	2	0	1	0	0	0	0	2	0	1	0	0	0	0	2	0	3.8	3.8	3.8	91.868	835	835	0	6.5055	By matching					By MS/MS		2	0
P49006	P49006	2	2	2	MARCKS-related protein	MARCKSL1	sp|P49006|MRP_HUMAN MARCKS-related protein OS=Homo sapiens OX=9606 GN=MARCKSL1 PE=1 SV=2	1	2	2	2	2	0	0	0	1	2	0	2	0	0	0	1	2	0	2	0	0	0	1	2	0	14.4	14.4	14.4	19.529	195	195	0	18.325	By MS/MS				By matching	By MS/MS		14.4	0
P49023	P49023	6	6	6	Paxillin	PXN	sp|P49023|PAXI_HUMAN Paxillin OS=Homo sapiens OX=9606 GN=PXN PE=1 SV=3	1	6	6	6	3	0	0	0	3	6	0	3	0	0	0	3	6	0	3	0	0	0	3	6	0	13.4	13.4	13.4	64.505	591	591	0	15.199	By MS/MS				By matching	By MS/MS		6.6	0
P49189	P49189	7	7	7	4-trimethylaminobutyraldehyde dehydrogenase	ALDH9A1	sp|P49189|AL9A1_HUMAN 4-trimethylaminobutyraldehyde dehydrogenase OS=Homo sapiens OX=9606 GN=ALDH9A1 PE=1 SV=3	1	7	7	7	3	0	0	0	1	4	0	3	0	0	0	1	4	0	3	0	0	0	1	4	0	16	16	16	53.801	494	494	0	11.573	By MS/MS				By matching	By MS/MS		7.3	0
P49207	P49207	5	5	5	60S ribosomal protein L34	RPL34	sp|P49207|RL34_HUMAN 60S ribosomal protein L34 OS=Homo sapiens OX=9606 GN=RPL34 PE=1 SV=3	1	5	5	5	4	0	3	3	4	5	4	4	0	3	3	4	5	4	4	0	3	3	4	5	4	29.1	29.1	29.1	13.293	117	117	0	11.503	By MS/MS		By MS/MS	By MS/MS	By MS/MS	By MS/MS	By MS/MS	21.4	0
P49257	P49257	6	6	6	Protein ERGIC-53	LMAN1	sp|P49257|LMAN1_HUMAN Protein ERGIC-53 OS=Homo sapiens OX=9606 GN=LMAN1 PE=1 SV=2	1	6	6	6	1	0	0	0	2	6	0	1	0	0	0	2	6	0	1	0	0	0	2	6	0	12.2	12.2	12.2	57.548	510	510	0	8.6235	By MS/MS				By MS/MS	By MS/MS		1.8	0
P49321	P49321	13	13	13	Nuclear autoantigenic sperm protein	NASP	sp|P49321|NASP_HUMAN Nuclear autoantigenic sperm protein OS=Homo sapiens OX=9606 GN=NASP PE=1 SV=2	1	13	13	13	10	0	5	4	5	10	1	10	0	5	4	5	10	1	10	0	5	4	5	10	1	18.7	18.7	18.7	85.237	788	788	0	58.812	By MS/MS		By MS/MS	By MS/MS	By MS/MS	By MS/MS	By MS/MS	15.2	0
P49327	P49327	49	49	49	Fatty acid synthase;[Acyl-carrier-protein] S-acetyltransferase;[Acyl-carrier-protein] S-malonyltransferase;3-oxoacyl-[acyl-carrier-protein] synthase;3-oxoacyl-[acyl-carrier-protein] reductase;3-hydroxyacyl-[acyl-carrier-protein] dehydratase;Enoyl-[acyl-carrier-protein] reductase;Oleoyl-[acyl-carrier-protein] hydrolase	FASN	sp|P49327|FAS_HUMAN Fatty acid synthase OS=Homo sapiens OX=9606 GN=FASN PE=1 SV=3	1	49	49	49	35	0	11	13	25	43	7	35	0	11	13	25	43	7	35	0	11	13	25	43	7	25.2	25.2	25.2	273.42	2511	2511	0	281.53	By MS/MS		By matching	By matching	By MS/MS	By MS/MS	By matching	18.4	0
P49368	P49368	29	29	29	T-complex protein 1 subunit gamma	CCT3	sp|P49368|TCPG_HUMAN T-complex protein 1 subunit gamma OS=Homo sapiens OX=9606 GN=CCT3 PE=1 SV=4	1	29	29	29	15	1	7	8	10	27	9	15	1	7	8	10	27	9	15	1	7	8	10	27	9	54.5	54.5	54.5	60.533	545	545	0	196.22	By MS/MS	By matching	By matching	By matching	By MS/MS	By MS/MS	By MS/MS	30.1	1.8
P49411	P49411	18	18	18	Elongation factor Tu, mitochondrial	TUFM	sp|P49411|EFTU_HUMAN Elongation factor Tu, mitochondrial OS=Homo sapiens OX=9606 GN=TUFM PE=1 SV=2	1	18	18	18	13	0	9	8	11	18	6	13	0	9	8	11	18	6	13	0	9	8	11	18	6	45.6	45.6	45.6	49.541	452	452	0	67.611	By MS/MS		By MS/MS	By MS/MS	By MS/MS	By MS/MS	By MS/MS	35.4	0
P49419	P49419	6	6	6	Alpha-aminoadipic semialdehyde dehydrogenase	ALDH7A1	sp|P49419|AL7A1_HUMAN Alpha-aminoadipic semialdehyde dehydrogenase OS=Homo sapiens OX=9606 GN=ALDH7A1 PE=1 SV=5	1	6	6	6	3	0	0	0	1	5	0	3	0	0	0	1	5	0	3	0	0	0	1	5	0	13.2	13.2	13.2	58.486	539	539	0	13.035	By MS/MS				By matching	By MS/MS		5.2	0
P49458	P49458	3	3	3	Signal recognition particle 9 kDa protein	SRP9	sp|P49458|SRP09_HUMAN Signal recognition particle 9 kDa protein OS=Homo sapiens OX=9606 GN=SRP9 PE=1 SV=2	1	3	3	3	0	0	0	0	0	3	0	0	0	0	0	0	3	0	0	0	0	0	0	3	0	31.4	31.4	31.4	10.112	86	86	0	8.0629						By MS/MS		0	0
P49459	P49459	2	2	2	Ubiquitin-conjugating enzyme E2 A	UBE2A	sp|P49459|UBE2A_HUMAN Ubiquitin-conjugating enzyme E2 A OS=Homo sapiens OX=9606 GN=UBE2A PE=1 SV=2	1	2	2	2	1	0	0	1	1	1	0	1	0	0	1	1	1	0	1	0	0	1	1	1	0	17.8	17.8	17.8	17.315	152	152	0	16.562	By MS/MS			By matching	By matching	By MS/MS		11.2	0
P49588	P49588	6	6	6	Alanine--tRNA ligase, cytoplasmic	AARS	sp|P49588|SYAC_HUMAN Alanine--tRNA ligase, cytoplasmic OS=Homo sapiens OX=9606 GN=AARS PE=1 SV=2	1	6	6	6	3	0	0	0	1	5	0	3	0	0	0	1	5	0	3	0	0	0	1	5	0	8.3	8.3	8.3	106.81	968	968	0	17.933	By MS/MS				By matching	By MS/MS		4.9	0
P49589	P49589	3	3	3	Cysteine--tRNA ligase, cytoplasmic	CARS	sp|P49589|SYCC_HUMAN Cysteine--tRNA ligase, cytoplasmic OS=Homo sapiens OX=9606 GN=CARS PE=1 SV=3	1	3	3	3	2	0	0	0	1	3	0	2	0	0	0	1	3	0	2	0	0	0	1	3	0	4.5	4.5	4.5	85.472	748	748	0	4.6281	By MS/MS				By matching	By MS/MS		3.2	0
P49591	P49591	7	7	7	Serine--tRNA ligase, cytoplasmic	SARS	sp|P49591|SYSC_HUMAN Serine--tRNA ligase, cytoplasmic OS=Homo sapiens OX=9606 GN=SARS PE=1 SV=3	1	7	7	7	1	0	0	0	0	7	3	1	0	0	0	0	7	3	1	0	0	0	0	7	3	13.4	13.4	13.4	58.777	514	514	0	31.174	By MS/MS					By MS/MS	By matching	1.8	0
P49720	P49720	3	3	3	Proteasome subunit beta type-3	PSMB3	sp|P49720|PSB3_HUMAN Proteasome subunit beta type-3 OS=Homo sapiens OX=9606 GN=PSMB3 PE=1 SV=2	1	3	3	3	3	0	1	0	2	2	0	3	0	1	0	2	2	0	3	0	1	0	2	2	0	20.5	20.5	20.5	22.949	205	205	0	65.413	By MS/MS		By matching		By matching	By MS/MS		20.5	0
P49721	P49721	8	8	8	Proteasome subunit beta type-2	PSMB2	sp|P49721|PSB2_HUMAN Proteasome subunit beta type-2 OS=Homo sapiens OX=9606 GN=PSMB2 PE=1 SV=1	1	8	8	8	5	0	3	4	5	5	2	5	0	3	4	5	5	2	5	0	3	4	5	5	2	41.8	41.8	41.8	22.836	201	201	0	23.342	By MS/MS		By matching	By matching	By MS/MS	By MS/MS	By matching	30.3	0
P49736	P49736	5	5	5	DNA replication licensing factor MCM2	MCM2	sp|P49736|MCM2_HUMAN DNA replication licensing factor MCM2 OS=Homo sapiens OX=9606 GN=MCM2 PE=1 SV=4	1	5	5	5	0	1	0	0	0	5	1	0	1	0	0	0	5	1	0	1	0	0	0	5	1	6.7	6.7	6.7	101.89	904	904	0	24.15		By matching				By MS/MS	By matching	0	1
P49748	P49748	11	11	11	Very long-chain specific acyl-CoA dehydrogenase, mitochondrial	ACADVL	sp|P49748|ACADV_HUMAN Very long-chain specific acyl-CoA dehydrogenase, mitochondrial OS=Homo sapiens OX=9606 GN=ACADVL PE=1 SV=1	1	11	11	11	6	0	0	0	6	8	0	6	0	0	0	6	8	0	6	0	0	0	6	8	0	19.8	19.8	19.8	70.389	655	655	0	17.974	By MS/MS				By MS/MS	By MS/MS		11	0
P49755	P49755	2	2	2	Transmembrane emp24 domain-containing protein 10	TMED10	sp|P49755|TMEDA_HUMAN Transmembrane emp24 domain-containing protein 10 OS=Homo sapiens OX=9606 GN=TMED10 PE=1 SV=2	1	2	2	2	1	0	0	0	0	2	0	1	0	0	0	0	2	0	1	0	0	0	0	2	0	8.7	8.7	8.7	24.976	219	219	0	4	By matching					By MS/MS		3.2	0
P49756	P49756	1	1	1	RNA-binding protein 25	RBM25	sp|P49756|RBM25_HUMAN RNA-binding protein 25 OS=Homo sapiens OX=9606 GN=RBM25 PE=1 SV=3	1	1	1	1	0	0	0	0	0	1	0	0	0	0	0	0	1	0	0	0	0	0	0	1	0	1.8	1.8	1.8	100.18	843	843	0.0042143	1.7485						By MS/MS		0	0
P49770	P49770	3	3	3	Translation initiation factor eIF-2B subunit beta	EIF2B2	sp|P49770|EI2BB_HUMAN Translation initiation factor eIF-2B subunit beta OS=Homo sapiens OX=9606 GN=EIF2B2 PE=1 SV=3	1	3	3	3	1	0	0	0	0	2	0	1	0	0	0	0	2	0	1	0	0	0	0	2	0	10	10	10	38.989	351	351	0.00065359	2.4996	By MS/MS					By MS/MS		4	0
P49773	P49773	7	7	7	Histidine triad nucleotide-binding protein 1	HINT1	sp|P49773|HINT1_HUMAN Histidine triad nucleotide-binding protein 1 OS=Homo sapiens OX=9606 GN=HINT1 PE=1 SV=2	1	7	7	7	6	0	4	4	4	7	2	6	0	4	4	4	7	2	6	0	4	4	4	7	2	63.5	63.5	63.5	13.802	126	126	0	65.713	By MS/MS		By matching	By matching	By MS/MS	By MS/MS	By MS/MS	44.4	0
P49792	P49792	1	1	1	E3 SUMO-protein ligase RanBP2	RANBP2	sp|P49792|RBP2_HUMAN E3 SUMO-protein ligase RanBP2 OS=Homo sapiens OX=9606 GN=RANBP2 PE=1 SV=2	1	1	1	1	0	0	0	0	0	1	0	0	0	0	0	0	1	0	0	0	0	0	0	1	0	1.2	1.2	1.2	358.2	3224	3224	0.00064599	2.4151						By MS/MS		0	0
P49915	P49915	6	6	6	GMP synthase [glutamine-hydrolyzing]	GMPS	sp|P49915|GUAA_HUMAN GMP synthase [glutamine-hydrolyzing] OS=Homo sapiens OX=9606 GN=GMPS PE=1 SV=1	1	6	6	6	4	0	2	1	2	5	0	4	0	2	1	2	5	0	4	0	2	1	2	5	0	10.5	10.5	10.5	76.715	693	693	0	9.94	By MS/MS		By matching	By matching	By matching	By MS/MS		6.5	0
P50213	P50213	5	5	5	Isocitrate dehydrogenase [NAD] subunit alpha, mitochondrial	IDH3A	sp|P50213|IDH3A_HUMAN Isocitrate dehydrogenase [NAD] subunit alpha, mitochondrial OS=Homo sapiens OX=9606 GN=IDH3A PE=1 SV=1	1	5	5	5	3	0	1	1	0	3	1	3	0	1	1	0	3	1	3	0	1	1	0	3	1	14.5	14.5	14.5	39.591	366	366	0	22.771	By MS/MS		By matching	By matching		By MS/MS	By matching	8.5	0
P50238	P50238	3	3	3	Cysteine-rich protein 1	CRIP1	sp|P50238|CRIP1_HUMAN Cysteine-rich protein 1 OS=Homo sapiens OX=9606 GN=CRIP1 PE=1 SV=3	1	3	3	3	2	0	1	0	1	3	1	2	0	1	0	1	3	1	2	0	1	0	1	3	1	45.5	45.5	45.5	8.5328	77	77	0	19.77	By MS/MS		By MS/MS		By MS/MS	By MS/MS	By MS/MS	45.5	0
P50395	P50395	20	20	11	Rab GDP dissociation inhibitor beta	GDI2	sp|P50395|GDIB_HUMAN Rab GDP dissociation inhibitor beta OS=Homo sapiens OX=9606 GN=GDI2 PE=1 SV=2	1	20	20	11	14	0	7	3	12	16	7	14	0	7	3	12	16	7	7	0	6	3	7	9	4	53.3	53.3	31.5	50.663	445	445	0	102.96	By MS/MS		By matching	By matching	By MS/MS	By MS/MS	By MS/MS	36.4	0
P50402	P50402	5	5	5	Emerin	EMD	sp|P50402|EMD_HUMAN Emerin OS=Homo sapiens OX=9606 GN=EMD PE=1 SV=1	1	5	5	5	3	0	2	3	3	4	1	3	0	2	3	3	4	1	3	0	2	3	3	4	1	26.4	26.4	26.4	28.994	254	254	0	20.7	By MS/MS		By matching	By matching	By MS/MS	By MS/MS	By matching	13.8	0
P50416	P50416	5	5	5	Carnitine O-palmitoyltransferase 1, liver isoform	CPT1A	sp|P50416|CPT1A_HUMAN Carnitine O-palmitoyltransferase 1, liver isoform OS=Homo sapiens OX=9606 GN=CPT1A PE=1 SV=2	1	5	5	5	2	0	0	1	1	5	0	2	0	0	1	1	5	0	2	0	0	1	1	5	0	7.9	7.9	7.9	88.367	773	773	0	24.905	By matching			By matching	By matching	By MS/MS		3.1	0
P50454	P50454	16	16	16	Serpin H1	SERPINH1	sp|P50454|SERPH_HUMAN Serpin H1 OS=Homo sapiens OX=9606 GN=SERPINH1 PE=1 SV=2	1	16	16	16	13	0	7	8	12	12	5	13	0	7	8	12	12	5	13	0	7	8	12	12	5	49	49	49	46.44	418	418	0	204.55	By MS/MS		By MS/MS	By MS/MS	By MS/MS	By MS/MS	By MS/MS	40.2	0
P50502;Q8IZP2;Q8NFI4	P50502;Q8IZP2;Q8NFI4	7;5;5	7;5;5	7;5;5	Hsc70-interacting protein;Putative protein FAM10A4;Putative protein FAM10A5	ST13;ST13P4;ST13P5	sp|P50502|F10A1_HUMAN Hsc70-interacting protein OS=Homo sapiens OX=9606 GN=ST13 PE=1 SV=2;sp|Q8IZP2|ST134_HUMAN Putative protein FAM10A4 OS=Homo sapiens OX=9606 GN=ST13P4 PE=5 SV=1;sp|Q8NFI4|F10A5_HUMAN Putative protein FAM10A5 OS=Homo sapiens OX=9606 GN=S	3	7	7	7	4	0	2	3	4	7	3	4	0	2	3	4	7	3	4	0	2	3	4	7	3	23	23	23	41.331	369	369;240;369	0	27.695	By MS/MS		By matching	By matching	By MS/MS	By MS/MS	By MS/MS	11.9	0
P50552	P50552	12	12	12	Vasodilator-stimulated phosphoprotein	VASP	sp|P50552|VASP_HUMAN Vasodilator-stimulated phosphoprotein OS=Homo sapiens OX=9606 GN=VASP PE=1 SV=3	1	12	12	12	7	0	0	0	3	10	1	7	0	0	0	3	10	1	7	0	0	0	3	10	1	36.6	36.6	36.6	39.829	380	380	0	69.502	By MS/MS				By MS/MS	By MS/MS	By MS/MS	17.9	0
P50570;Q05193;Q9UQ16	P50570;Q05193	3;2;1	3;2;1	3;2;1	Dynamin-2;Dynamin-1	DNM2;DNM1	sp|P50570|DYN2_HUMAN Dynamin-2 OS=Homo sapiens OX=9606 GN=DNM2 PE=1 SV=2;sp|Q05193|DYN1_HUMAN Dynamin-1 OS=Homo sapiens OX=9606 GN=DNM1 PE=1 SV=2	3	3	3	3	1	0	0	0	1	2	0	1	0	0	0	1	2	0	1	0	0	0	1	2	0	3.1	3.1	3.1	98.063	870	870;864;869	0	4.1887	By MS/MS				By matching	By MS/MS		1.1	0
P50579	P50579	4	4	4	Methionine aminopeptidase 2	METAP2	sp|P50579|MAP2_HUMAN Methionine aminopeptidase 2 OS=Homo sapiens OX=9606 GN=METAP2 PE=1 SV=1	1	4	4	4	1	0	0	0	0	3	0	1	0	0	0	0	3	0	1	0	0	0	0	3	0	13	13	13	52.891	478	478	0	18.56	By MS/MS					By MS/MS		3.8	0
P50583	P50583	1	1	1	Bis(5-nucleosyl)-tetraphosphatase [asymmetrical]	NUDT2	sp|P50583|AP4A_HUMAN Bis(5-nucleosyl)-tetraphosphatase [asymmetrical] OS=Homo sapiens OX=9606 GN=NUDT2 PE=1 SV=3	1	1	1	1	0	0	0	0	0	1	0	0	0	0	0	0	1	0	0	0	0	0	0	1	0	6.1	6.1	6.1	16.829	147	147	0.0042322	1.7804						By MS/MS		0	0
P50897	P50897	2	2	2	Palmitoyl-protein thioesterase 1	PPT1	sp|P50897|PPT1_HUMAN Palmitoyl-protein thioesterase 1 OS=Homo sapiens OX=9606 GN=PPT1 PE=1 SV=1	1	2	2	2	1	0	0	0	1	2	0	1	0	0	0	1	2	0	1	0	0	0	1	2	0	8.2	8.2	8.2	34.193	306	306	0.00067797	2.9512	By MS/MS				By matching	By MS/MS		4.2	0
P50914	P50914	5	5	5	60S ribosomal protein L14	RPL14	sp|P50914|RL14_HUMAN 60S ribosomal protein L14 OS=Homo sapiens OX=9606 GN=RPL14 PE=1 SV=4	1	5	5	5	3	0	3	3	3	5	2	3	0	3	3	3	5	2	3	0	3	3	3	5	2	24.2	24.2	24.2	23.432	215	215	0	38.715	By MS/MS		By MS/MS	By MS/MS	By MS/MS	By MS/MS	By MS/MS	16.3	0
P50990	P50990	29	29	29	T-complex protein 1 subunit theta	CCT8	sp|P50990|TCPQ_HUMAN T-complex protein 1 subunit theta OS=Homo sapiens OX=9606 GN=CCT8 PE=1 SV=4	1	29	29	29	19	0	8	10	14	28	8	19	0	8	10	14	28	8	19	0	8	10	14	28	8	58	58	58	59.62	548	548	0	107.37	By MS/MS		By MS/MS	By MS/MS	By MS/MS	By MS/MS	By MS/MS	38.5	0
P50991	P50991	22	22	22	T-complex protein 1 subunit delta	CCT4	sp|P50991|TCPD_HUMAN T-complex protein 1 subunit delta OS=Homo sapiens OX=9606 GN=CCT4 PE=1 SV=4	1	22	22	22	14	0	9	7	11	21	10	14	0	9	7	11	21	10	14	0	9	7	11	21	10	48.1	48.1	48.1	57.924	539	539	0	107.31	By MS/MS		By MS/MS	By MS/MS	By MS/MS	By MS/MS	By MS/MS	29.9	0
P50995;P27216	P50995	5;1	5;1	5;1	Annexin A11	ANXA11	sp|P50995|ANX11_HUMAN Annexin A11 OS=Homo sapiens OX=9606 GN=ANXA11 PE=1 SV=1	2	5	5	5	1	0	0	0	1	5	0	1	0	0	0	1	5	0	1	0	0	0	1	5	0	11.5	11.5	11.5	54.389	505	505;316	0	11.933	By MS/MS				By matching	By MS/MS		1.8	0
P51114;P51116;Q06787	P51114;P51116	4;2;1	4;2;1	4;2;1	Fragile X mental retardation syndrome-related protein 1;Fragile X mental retardation syndrome-related protein 2	FXR1;FXR2	sp|P51114|FXR1_HUMAN Fragile X mental retardation syndrome-related protein 1 OS=Homo sapiens OX=9606 GN=FXR1 PE=1 SV=3;sp|P51116|FXR2_HUMAN Fragile X mental retardation syndrome-related protein 2 OS=Homo sapiens OX=9606 GN=FXR2 PE=1 SV=2	3	4	4	4	2	0	0	0	0	4	1	2	0	0	0	0	4	1	2	0	0	0	0	4	1	6	6	6	69.72	621	621;673;632	0	5.2613	By MS/MS					By MS/MS	By matching	2.9	0
P51148;P61020	P51148	5;2	5;2	3;0	Ras-related protein Rab-5C	RAB5C	sp|P51148|RAB5C_HUMAN Ras-related protein Rab-5C OS=Homo sapiens OX=9606 GN=RAB5C PE=1 SV=2	2	5	5	3	3	0	1	2	3	5	0	3	0	1	2	3	5	0	2	0	0	1	2	3	0	28.7	28.7	18.5	23.482	216	216;215	0	21.626	By MS/MS		By matching	By matching	By MS/MS	By MS/MS		17.1	0
P51149;Q2WGJ9;Q9HC10	P51149	9;1;1	9;1;1	9;1;1	Ras-related protein Rab-7a	RAB7A	sp|P51149|RAB7A_HUMAN Ras-related protein Rab-7a OS=Homo sapiens OX=9606 GN=RAB7A PE=1 SV=1	3	9	9	9	6	0	5	4	6	6	3	6	0	5	4	6	6	3	6	0	5	4	6	6	3	48.3	48.3	48.3	23.489	207	207;1857;1997	0	39.38	By MS/MS		By MS/MS	By matching	By MS/MS	By MS/MS	By MS/MS	34.3	0
P51452	P51452	2	2	2	Dual specificity protein phosphatase 3	DUSP3	sp|P51452|DUS3_HUMAN Dual specificity protein phosphatase 3 OS=Homo sapiens OX=9606 GN=DUSP3 PE=1 SV=1	1	2	2	2	0	0	0	0	0	2	0	0	0	0	0	0	2	0	0	0	0	0	0	2	0	14.6	14.6	14.6	20.478	185	185	0.005872	1.5519						By MS/MS		0	0
P51570	P51570	3	3	3	Galactokinase	GALK1	sp|P51570|GALK1_HUMAN Galactokinase OS=Homo sapiens OX=9606 GN=GALK1 PE=1 SV=1	1	3	3	3	0	0	0	0	0	3	0	0	0	0	0	0	3	0	0	0	0	0	0	3	0	7.9	7.9	7.9	42.272	392	392	0	9.6928						By MS/MS		0	0
P51571	P51571	1	1	1	Translocon-associated protein subunit delta	SSR4	sp|P51571|SSRD_HUMAN Translocon-associated protein subunit delta OS=Homo sapiens OX=9606 GN=SSR4 PE=1 SV=1	1	1	1	1	1	0	0	0	1	0	0	1	0	0	0	1	0	0	1	0	0	0	1	0	0	11	11	11	18.998	173	173	0	8.8145	By MS/MS				By matching			11	0
P51572	P51572	3	3	3	B-cell receptor-associated protein 31	BCAP31	sp|P51572|BAP31_HUMAN B-cell receptor-associated protein 31 OS=Homo sapiens OX=9606 GN=BCAP31 PE=1 SV=3	1	3	3	3	2	0	2	1	2	3	1	2	0	2	1	2	3	1	2	0	2	1	2	3	1	11.8	11.8	11.8	27.991	246	246	0	5.6328	By MS/MS		By matching	By matching	By MS/MS	By MS/MS	By matching	7.3	0
P51610	P51610	1	1	1	Host cell factor 1;HCF N-terminal chain 1;HCF N-terminal chain 2;HCF N-terminal chain 3;HCF N-terminal chain 4;HCF N-terminal chain 5;HCF N-terminal chain 6;HCF C-terminal chain 1;HCF C-terminal chain 2;HCF C-terminal chain 3;HCF C-terminal chain 4;HCF C-terminal chain 5;HCF C-terminal chain 6	HCFC1	sp|P51610|HCFC1_HUMAN Host cell factor 1 OS=Homo sapiens OX=9606 GN=HCFC1 PE=1 SV=2	1	1	1	1	1	0	1	0	1	1	0	1	0	1	0	1	1	0	1	0	1	0	1	1	0	0.8	0.8	0.8	208.73	2035	2035	0	3.7526	By MS/MS		By matching		By matching	By MS/MS		0.8	0
P51648;P48448;P43353	P51648	3;1;1	2;0;0	2;0;0	Fatty aldehyde dehydrogenase	ALDH3A2	sp|P51648|AL3A2_HUMAN Fatty aldehyde dehydrogenase OS=Homo sapiens OX=9606 GN=ALDH3A2 PE=1 SV=1	3	3	2	2	2	0	0	0	2	2	0	1	0	0	0	1	2	0	1	0	0	0	1	2	0	7.8	5.4	5.4	54.847	485	485;385;468	0	4.4502	By MS/MS				By matching	By MS/MS		5.4	0
P51659	P51659	8	8	8	Peroxisomal multifunctional enzyme type 2;(3R)-hydroxyacyl-CoA dehydrogenase;Enoyl-CoA hydratase 2	HSD17B4	sp|P51659|DHB4_HUMAN Peroxisomal multifunctional enzyme type 2 OS=Homo sapiens OX=9606 GN=HSD17B4 PE=1 SV=3	1	8	8	8	3	0	1	0	3	5	0	3	0	1	0	3	5	0	3	0	1	0	3	5	0	14	14	14	79.685	736	736	0	28.567	By MS/MS		By matching		By MS/MS	By MS/MS		5.8	0
P51665	P51665	6	6	6	26S proteasome non-ATPase regulatory subunit 7	PSMD7	sp|P51665|PSMD7_HUMAN 26S proteasome non-ATPase regulatory subunit 7 OS=Homo sapiens OX=9606 GN=PSMD7 PE=1 SV=2	1	6	6	6	5	0	0	0	2	5	0	5	0	0	0	2	5	0	5	0	0	0	2	5	0	21.3	21.3	21.3	37.025	324	324	0	43.673	By MS/MS				By matching	By MS/MS		18.2	0
P51808	P51808	1	1	1	Dynein light chain Tctex-type 3	DYNLT3	sp|P51808|DYLT3_HUMAN Dynein light chain Tctex-type 3 OS=Homo sapiens OX=9606 GN=DYNLT3 PE=1 SV=1	1	1	1	1	1	0	0	0	1	1	1	1	0	0	0	1	1	1	1	0	0	0	1	1	1	14.7	14.7	14.7	13.062	116	116	0	3.6818	By MS/MS				By matching	By MS/MS	By matching	14.7	0
P51857	P51857	1	1	1	3-oxo-5-beta-steroid 4-dehydrogenase	AKR1D1	sp|P51857|AK1D1_HUMAN 3-oxo-5-beta-steroid 4-dehydrogenase OS=Homo sapiens OX=9606 GN=AKR1D1 PE=1 SV=1	1	1	1	1	1	0	1	1	1	1	1	1	0	1	1	1	1	1	1	0	1	1	1	1	1	2.8	2.8	2.8	37.376	326	326	0	3.4542	By MS/MS		By matching	By MS/MS	By MS/MS	By MS/MS	By MS/MS	2.8	0
P51858;Q9Y3E1	P51858	12;1	12;1	11;0	Hepatoma-derived growth factor	HDGF	sp|P51858|HDGF_HUMAN Hepatoma-derived growth factor OS=Homo sapiens OX=9606 GN=HDGF PE=1 SV=1	2	12	12	11	8	0	6	4	6	10	5	8	0	6	4	6	10	5	8	0	6	4	6	9	5	52.1	52.1	48.8	26.788	240	240;203	0	39.711	By MS/MS		By matching	By MS/MS	By MS/MS	By MS/MS	By MS/MS	40	0
P51991	P51991	15	13	13	Heterogeneous nuclear ribonucleoprotein A3	HNRNPA3	sp|P51991|ROA3_HUMAN Heterogeneous nuclear ribonucleoprotein A3 OS=Homo sapiens OX=9606 GN=HNRNPA3 PE=1 SV=2	1	15	13	13	9	0	5	6	3	14	2	9	0	5	6	3	12	2	9	0	5	6	3	12	2	40.5	40.5	40.5	39.594	378	378	0	107.27	By MS/MS		By MS/MS	By MS/MS	By MS/MS	By MS/MS	By MS/MS	31.7	0
P52209	P52209	14	14	14	6-phosphogluconate dehydrogenase, decarboxylating	PGD	sp|P52209|6PGD_HUMAN 6-phosphogluconate dehydrogenase, decarboxylating OS=Homo sapiens OX=9606 GN=PGD PE=1 SV=3	1	14	14	14	13	0	3	2	7	11	5	13	0	3	2	7	11	5	13	0	3	2	7	11	5	34.6	34.6	34.6	53.139	483	483	0	89.54	By MS/MS		By matching	By matching	By MS/MS	By MS/MS	By MS/MS	32.9	0
P52272	P52272	23	23	23	Heterogeneous nuclear ribonucleoprotein M	HNRNPM	sp|P52272|HNRPM_HUMAN Heterogeneous nuclear ribonucleoprotein M OS=Homo sapiens OX=9606 GN=HNRNPM PE=1 SV=3	1	23	23	23	9	0	9	8	8	20	11	9	0	9	8	8	20	11	9	0	9	8	8	20	11	33	33	33	77.515	730	730	0	116.88	By MS/MS		By MS/MS	By MS/MS	By MS/MS	By MS/MS	By MS/MS	16.3	0
P52292	P52292	15	15	15	Importin subunit alpha-1	KPNA2	sp|P52292|IMA1_HUMAN Importin subunit alpha-1 OS=Homo sapiens OX=9606 GN=KPNA2 PE=1 SV=1	1	15	15	15	13	0	3	3	7	11	2	13	0	3	3	7	11	2	13	0	3	3	7	11	2	37.8	37.8	37.8	57.861	529	529	0	161.28	By MS/MS		By matching	By matching	By MS/MS	By MS/MS	By matching	34.2	0
P52294	P52294	4	1	1	Importin subunit alpha-5;Importin subunit alpha-5, N-terminally processed	KPNA1	sp|P52294|IMA5_HUMAN Importin subunit alpha-5 OS=Homo sapiens OX=9606 GN=KPNA1 PE=1 SV=3	1	4	1	1	3	0	0	0	0	3	0	1	0	0	0	0	1	0	1	0	0	0	0	1	0	10	1.9	1.9	60.221	538	538	0.00064767	2.4407	By MS/MS					By MS/MS		7.2	0
P52298	P52298	1	1	1	Nuclear cap-binding protein subunit 2	NCBP2	sp|P52298|NCBP2_HUMAN Nuclear cap-binding protein subunit 2 OS=Homo sapiens OX=9606 GN=NCBP2 PE=1 SV=1	1	1	1	1	0	0	0	0	0	1	0	0	0	0	0	0	1	0	0	0	0	0	0	1	0	7.1	7.1	7.1	18.001	156	156	0.00068776	3.1534						By MS/MS		0	0
P52306	P52306	7	7	7	Rap1 GTPase-GDP dissociation stimulator 1	RAP1GDS1	sp|P52306|GDS1_HUMAN Rap1 GTPase-GDP dissociation stimulator 1 OS=Homo sapiens OX=9606 GN=RAP1GDS1 PE=1 SV=3	1	7	7	7	2	0	0	0	1	7	0	2	0	0	0	1	7	0	2	0	0	0	1	7	0	14	14	14	66.316	607	607	0	23.588	By MS/MS				By matching	By MS/MS		5.8	0
P52434	P52434	2	2	2	DNA-directed RNA polymerases I, II, and III subunit RPABC3	POLR2H	sp|P52434|RPAB3_HUMAN DNA-directed RNA polymerases I, II, and III subunit RPABC3 OS=Homo sapiens OX=9606 GN=POLR2H PE=1 SV=4	1	2	2	2	0	0	0	0	0	2	1	0	0	0	0	0	2	1	0	0	0	0	0	2	1	19.3	19.3	19.3	17.143	150	150	0	8.2038						By MS/MS	By matching	0	0
P52565	P52565	8	8	8	Rho GDP-dissociation inhibitor 1	ARHGDIA	sp|P52565|GDIR1_HUMAN Rho GDP-dissociation inhibitor 1 OS=Homo sapiens OX=9606 GN=ARHGDIA PE=1 SV=3	1	8	8	8	7	0	5	2	4	6	3	7	0	5	2	4	6	3	7	0	5	2	4	6	3	51	51	51	23.207	204	204	0	56.269	By MS/MS		By MS/MS	By matching	By MS/MS	By MS/MS	By MS/MS	51	0
P52594	P52594	1	1	1	Arf-GAP domain and FG repeat-containing protein 1	AGFG1	sp|P52594|AGFG1_HUMAN Arf-GAP domain and FG repeat-containing protein 1 OS=Homo sapiens OX=9606 GN=AGFG1 PE=1 SV=2	1	1	1	1	0	0	0	0	0	1	0	0	0	0	0	0	1	0	0	0	0	0	0	1	0	4.1	4.1	4.1	58.259	562	562	0	3.3145						By MS/MS		0	0
P52597	P52597	8	6	6	Heterogeneous nuclear ribonucleoprotein F;Heterogeneous nuclear ribonucleoprotein F, N-terminally processed	HNRNPF	sp|P52597|HNRPF_HUMAN Heterogeneous nuclear ribonucleoprotein F OS=Homo sapiens OX=9606 GN=HNRNPF PE=1 SV=3	1	8	6	6	4	0	3	3	4	8	2	2	0	1	1	2	6	0	2	0	1	1	2	6	0	26.7	20.2	20.2	45.671	415	415	0	37.642	By MS/MS		By matching	By matching	By matching	By MS/MS	By matching	14.5	0
P52788	P52788	9	9	9	Spermine synthase	SMS	sp|P52788|SPSY_HUMAN Spermine synthase OS=Homo sapiens OX=9606 GN=SMS PE=1 SV=2	1	9	9	9	7	0	1	0	4	7	2	7	0	1	0	4	7	2	7	0	1	0	4	7	2	24.3	24.3	24.3	41.268	366	366	0	21.45	By MS/MS		By matching		By MS/MS	By MS/MS	By matching	19.7	0
P52815	P52815	5	5	5	39S ribosomal protein L12, mitochondrial	MRPL12	sp|P52815|RM12_HUMAN 39S ribosomal protein L12, mitochondrial OS=Homo sapiens OX=9606 GN=MRPL12 PE=1 SV=2	1	5	5	5	3	0	2	2	3	3	0	3	0	2	2	3	3	0	3	0	2	2	3	3	0	35.4	35.4	35.4	21.348	198	198	0	11.966	By MS/MS		By matching	By matching	By MS/MS	By MS/MS		18.2	0
P52888	P52888	3	3	3	Thimet oligopeptidase	THOP1	sp|P52888|THOP1_HUMAN Thimet oligopeptidase OS=Homo sapiens OX=9606 GN=THOP1 PE=1 SV=2	1	3	3	3	1	0	0	0	1	3	0	1	0	0	0	1	3	0	1	0	0	0	1	3	0	5.5	5.5	5.5	78.839	689	689	0	7.1584	By matching				By matching	By MS/MS		1.2	0
P52895	P52895	14	4	4	Aldo-keto reductase family 1 member C2	AKR1C2	sp|P52895|AK1C2_HUMAN Aldo-keto reductase family 1 member C2 OS=Homo sapiens OX=9606 GN=AKR1C2 PE=1 SV=3	1	14	4	4	13	0	5	5	13	10	4	4	0	1	2	4	3	1	4	0	1	2	4	3	1	54.8	20.4	20.4	36.735	323	323	0	28.58	By MS/MS		By matching	By matching	By MS/MS	By MS/MS	By MS/MS	54.8	0
P52907	P52907	11	11	7	F-actin-capping protein subunit alpha-1	CAPZA1	sp|P52907|CAZA1_HUMAN F-actin-capping protein subunit alpha-1 OS=Homo sapiens OX=9606 GN=CAPZA1 PE=1 SV=3	1	11	11	7	6	0	5	5	6	9	4	6	0	5	5	6	9	4	3	0	3	3	4	6	3	54.9	54.9	40.9	32.922	286	286	0	99.789	By MS/MS		By MS/MS	By MS/MS	By MS/MS	By MS/MS	By MS/MS	30.4	0
P52943	P52943	5	5	5	Cysteine-rich protein 2	CRIP2	sp|P52943|CRIP2_HUMAN Cysteine-rich protein 2 OS=Homo sapiens OX=9606 GN=CRIP2 PE=1 SV=1	1	5	5	5	1	0	0	0	1	5	0	1	0	0	0	1	5	0	1	0	0	0	1	5	0	47.6	47.6	47.6	22.492	208	208	0	15.732	By MS/MS				By matching	By MS/MS		7.7	0
P53004	P53004	5	5	5	Biliverdin reductase A	BLVRA	sp|P53004|BIEA_HUMAN Biliverdin reductase A OS=Homo sapiens OX=9606 GN=BLVRA PE=1 SV=2	1	5	5	5	2	0	0	0	2	4	0	2	0	0	0	2	4	0	2	0	0	0	2	4	0	17.9	17.9	17.9	33.428	296	296	0	9.1713	By MS/MS				By matching	By MS/MS		9.1	0
P53396	P53396	37	37	37	ATP-citrate synthase	ACLY	sp|P53396|ACLY_HUMAN ATP-citrate synthase OS=Homo sapiens OX=9606 GN=ACLY PE=1 SV=3	1	37	37	37	26	0	8	8	21	31	11	26	0	8	8	21	31	11	26	0	8	8	21	31	11	37.1	37.1	37.1	120.84	1101	1101	0	213.09	By MS/MS		By MS/MS	By MS/MS	By MS/MS	By MS/MS	By MS/MS	27	0
P53582	P53582	2	2	2	Methionine aminopeptidase 1	METAP1	sp|P53582|MAP11_HUMAN Methionine aminopeptidase 1 OS=Homo sapiens OX=9606 GN=METAP1 PE=1 SV=2	1	2	2	2	1	0	0	0	1	1	0	1	0	0	0	1	1	0	1	0	0	0	1	1	0	8.3	8.3	8.3	43.215	386	386	0	5.7524	By MS/MS				By matching	By MS/MS		5.2	0
P53597	P53597	1	1	1	Succinyl-CoA ligase [ADP/GDP-forming] subunit alpha, mitochondrial	SUCLG1	sp|P53597|SUCA_HUMAN Succinate--CoA ligase [ADP/GDP-forming] subunit alpha, mitochondrial OS=Homo sapiens OX=9606 GN=SUCLG1 PE=1 SV=4	1	1	1	1	0	0	0	0	0	1	0	0	0	0	0	0	1	0	0	0	0	0	0	1	0	2.6	2.6	2.6	36.249	346	346	0.00064433	2.4036						By MS/MS		0	0
P53618	P53618	9	9	9	Coatomer subunit beta	COPB1	sp|P53618|COPB_HUMAN Coatomer subunit beta OS=Homo sapiens OX=9606 GN=COPB1 PE=1 SV=3	1	9	9	9	5	0	0	0	4	7	0	5	0	0	0	4	7	0	5	0	0	0	4	7	0	14.6	14.6	14.6	107.14	953	953	0	38.663	By MS/MS				By matching	By MS/MS		9	0
P53621	P53621	16	16	16	Coatomer subunit alpha;Xenin;Proxenin	COPA	sp|P53621|COPA_HUMAN Coatomer subunit alpha OS=Homo sapiens OX=9606 GN=COPA PE=1 SV=2	1	16	16	16	7	0	2	1	6	15	2	7	0	2	1	6	15	2	7	0	2	1	6	15	2	14.1	14.1	14.1	138.34	1224	1224	0	41.493	By MS/MS		By matching	By matching	By MS/MS	By MS/MS	By matching	6.9	0
P53675	P53675	14	2	2	Clathrin heavy chain 2	CLTCL1	sp|P53675|CLH2_HUMAN Clathrin heavy chain 2 OS=Homo sapiens OX=9606 GN=CLTCL1 PE=1 SV=2	1	14	2	2	10	0	2	0	8	11	7	2	0	0	0	1	1	0	2	0	0	0	1	1	0	7.7	1.2	1.2	187.03	1640	1640	0	3.6686	By MS/MS		By matching		By matching	By MS/MS	By matching	6	0
P53701	P53701	2	2	2	Cytochrome c-type heme lyase	HCCS	sp|P53701|CCHL_HUMAN Cytochrome c-type heme lyase OS=Homo sapiens OX=9606 GN=HCCS PE=1 SV=1	1	2	2	2	0	0	0	0	0	2	1	0	0	0	0	0	2	1	0	0	0	0	0	2	1	7.8	7.8	7.8	30.601	268	268	0.00065402	2.5147						By MS/MS	By matching	0	0
P53985	P53985	2	2	2	Monocarboxylate transporter 1	SLC16A1	sp|P53985|MOT1_HUMAN Monocarboxylate transporter 1 OS=Homo sapiens OX=9606 GN=SLC16A1 PE=1 SV=3	1	2	2	2	2	0	2	1	1	2	1	2	0	2	1	1	2	1	2	0	2	1	1	2	1	6	6	6	53.944	500	500	0	6.4274	By MS/MS		By MS/MS	By matching	By matching	By MS/MS	By matching	6	0
P53990	P53990	1	1	1	IST1 homolog	IST1	sp|P53990|IST1_HUMAN IST1 homolog OS=Homo sapiens OX=9606 GN=IST1 PE=1 SV=1	1	1	1	1	0	0	0	0	0	1	0	0	0	0	0	0	1	0	0	0	0	0	0	1	0	5.2	5.2	5.2	39.75	364	364	0.0069565	1.4573						By MS/MS		0	0
P53999	P53999	4	4	4	Activated RNA polymerase II transcriptional coactivator p15	SUB1	sp|P53999|TCP4_HUMAN Activated RNA polymerase II transcriptional coactivator p15 OS=Homo sapiens OX=9606 GN=SUB1 PE=1 SV=3	1	4	4	4	3	0	3	3	2	4	1	3	0	3	3	2	4	1	3	0	3	3	2	4	1	33.9	33.9	33.9	14.395	127	127	0	28.736	By MS/MS		By MS/MS	By MS/MS	By MS/MS	By MS/MS	By matching	26	0
P54105	P54105	2	2	2	Methylosome subunit pICln	CLNS1A	sp|P54105|ICLN_HUMAN Methylosome subunit pICln OS=Homo sapiens OX=9606 GN=CLNS1A PE=1 SV=1	1	2	2	2	2	0	0	1	0	1	0	2	0	0	1	0	1	0	2	0	0	1	0	1	0	10.5	10.5	10.5	26.215	237	237	0	6.3691	By MS/MS			By matching		By MS/MS		10.5	0
P54136	P54136	17	17	17	Arginine--tRNA ligase, cytoplasmic	RARS	sp|P54136|SYRC_HUMAN Arginine--tRNA ligase, cytoplasmic OS=Homo sapiens OX=9606 GN=RARS PE=1 SV=2	1	17	17	17	10	0	2	3	5	14	2	10	0	2	3	5	14	2	10	0	2	3	5	14	2	29.8	29.8	29.8	75.378	660	660	0	59.769	By MS/MS		By matching	By matching	By matching	By MS/MS	By matching	19.5	0
P54577	P54577	24	24	24	Tyrosine--tRNA ligase, cytoplasmic;Tyrosine--tRNA ligase, cytoplasmic, N-terminally processed	YARS	sp|P54577|SYYC_HUMAN Tyrosine--tRNA ligase, cytoplasmic OS=Homo sapiens OX=9606 GN=YARS PE=1 SV=4	1	24	24	24	16	0	2	5	9	19	4	16	0	2	5	9	19	4	16	0	2	5	9	19	4	44.9	44.9	44.9	59.143	528	528	0	86.262	By MS/MS		By matching	By matching	By matching	By MS/MS	By matching	34.3	0
P54578	P54578	8	8	8	Ubiquitin carboxyl-terminal hydrolase 14	USP14	sp|P54578|UBP14_HUMAN Ubiquitin carboxyl-terminal hydrolase 14 OS=Homo sapiens OX=9606 GN=USP14 PE=1 SV=3	1	8	8	8	1	1	0	0	1	7	0	1	1	0	0	1	7	0	1	1	0	0	1	7	0	18.4	18.4	18.4	56.068	494	494	0	13.797	By MS/MS	By matching			By matching	By MS/MS		2.6	1.4
P54709	P54709	4	4	4	Sodium/potassium-transporting ATPase subunit beta-3	ATP1B3	sp|P54709|AT1B3_HUMAN Sodium/potassium-transporting ATPase subunit beta-3 OS=Homo sapiens OX=9606 GN=ATP1B3 PE=1 SV=1	1	4	4	4	1	0	0	1	1	4	0	1	0	0	1	1	4	0	1	0	0	1	1	4	0	16.8	16.8	16.8	31.512	279	279	0	7.3123	By MS/MS			By matching	By matching	By MS/MS		3.9	0
P54727;P54725	P54727	8;2	8;2	8;2	UV excision repair protein RAD23 homolog B	RAD23B	sp|P54727|RD23B_HUMAN UV excision repair protein RAD23 homolog B OS=Homo sapiens OX=9606 GN=RAD23B PE=1 SV=1	2	8	8	8	5	0	3	3	2	8	3	5	0	3	3	2	8	3	5	0	3	3	2	8	3	21.3	21.3	21.3	43.171	409	409;363	0	42.176	By MS/MS		By matching	By matching	By matching	By MS/MS	By matching	15.4	0
P54819	P54819	6	6	6	Adenylate kinase 2, mitochondrial;Adenylate kinase 2, mitochondrial, N-terminally processed	AK2	sp|P54819|KAD2_HUMAN Adenylate kinase 2, mitochondrial OS=Homo sapiens OX=9606 GN=AK2 PE=1 SV=2	1	6	6	6	3	0	1	2	3	4	2	3	0	1	2	3	4	2	3	0	1	2	3	4	2	31.4	31.4	31.4	26.477	239	239	0	19.233	By MS/MS		By matching	By matching	By MS/MS	By MS/MS	By matching	14.6	0
P54886	P54886	6	6	6	Delta-1-pyrroline-5-carboxylate synthase;Glutamate 5-kinase;Gamma-glutamyl phosphate reductase	ALDH18A1	sp|P54886|P5CS_HUMAN Delta-1-pyrroline-5-carboxylate synthase OS=Homo sapiens OX=9606 GN=ALDH18A1 PE=1 SV=2	1	6	6	6	3	0	0	0	1	4	0	3	0	0	0	1	4	0	3	0	0	0	1	4	0	8.2	8.2	8.2	87.301	795	795	0	12.25	By MS/MS				By matching	By MS/MS		4.4	0
P54920;Q9H115	P54920	4;1	4;1	4;1	Alpha-soluble NSF attachment protein	NAPA	sp|P54920|SNAA_HUMAN Alpha-soluble NSF attachment protein OS=Homo sapiens OX=9606 GN=NAPA PE=1 SV=3	2	4	4	4	0	0	0	0	0	4	0	0	0	0	0	0	4	0	0	0	0	0	0	4	0	16.3	16.3	16.3	33.232	295	295;298	0	11.56						By MS/MS		0	0
P55010	P55010	9	9	9	Eukaryotic translation initiation factor 5	EIF5	sp|P55010|IF5_HUMAN Eukaryotic translation initiation factor 5 OS=Homo sapiens OX=9606 GN=EIF5 PE=1 SV=2	1	9	9	9	6	0	0	0	3	7	0	6	0	0	0	3	7	0	6	0	0	0	3	7	0	25.1	25.1	25.1	49.222	431	431	0	17.707	By MS/MS				By matching	By MS/MS		17.2	0
P55036;A2A3N6	P55036	7;1	7;1	7;1	26S proteasome non-ATPase regulatory subunit 4	PSMD4	sp|P55036|PSMD4_HUMAN 26S proteasome non-ATPase regulatory subunit 4 OS=Homo sapiens OX=9606 GN=PSMD4 PE=1 SV=1	2	7	7	7	3	0	2	1	2	6	1	3	0	2	1	2	6	1	3	0	2	1	2	6	1	18.3	18.3	18.3	40.736	377	377;862	0	16.97	By MS/MS		By matching	By matching	By MS/MS	By MS/MS	By matching	10.6	0
P55039	P55039	3	2	2	Developmentally-regulated GTP-binding protein 2	DRG2	sp|P55039|DRG2_HUMAN Developmentally-regulated GTP-binding protein 2 OS=Homo sapiens OX=9606 GN=DRG2 PE=1 SV=1	1	3	2	2	0	0	0	0	0	3	0	0	0	0	0	0	2	0	0	0	0	0	0	2	0	7.4	5.5	5.5	40.746	364	364	0.00067843	2.9635						By MS/MS		0	0
P55060	P55060	18	18	18	Exportin-2	CSE1L	sp|P55060|XPO2_HUMAN Exportin-2 OS=Homo sapiens OX=9606 GN=CSE1L PE=1 SV=3	1	18	18	18	10	0	2	1	3	15	4	10	0	2	1	3	15	4	10	0	2	1	3	15	4	19.1	19.1	19.1	110.42	971	971	0	73.963	By MS/MS		By MS/MS	By MS/MS	By MS/MS	By MS/MS	By matching	11.7	0
P55072	P55072	45	45	45	Transitional endoplasmic reticulum ATPase	VCP	sp|P55072|TERA_HUMAN Transitional endoplasmic reticulum ATPase OS=Homo sapiens OX=9606 GN=VCP PE=1 SV=4	1	45	45	45	36	0	18	14	26	33	11	36	0	18	14	26	33	11	36	0	18	14	26	33	11	60	60	60	89.321	806	806	0	323.31	By MS/MS		By MS/MS	By MS/MS	By MS/MS	By MS/MS	By MS/MS	50.7	0
P55084	P55084	6	6	6	Trifunctional enzyme subunit beta, mitochondrial;3-ketoacyl-CoA thiolase	HADHB	sp|P55084|ECHB_HUMAN Trifunctional enzyme subunit beta, mitochondrial OS=Homo sapiens OX=9606 GN=HADHB PE=1 SV=3	1	6	6	6	3	0	1	1	3	6	2	3	0	1	1	3	6	2	3	0	1	1	3	6	2	12.4	12.4	12.4	51.294	474	474	0	9.3364	By MS/MS		By matching	By matching	By MS/MS	By MS/MS	By matching	5.7	0
P55145	P55145	3	3	3	Mesencephalic astrocyte-derived neurotrophic factor	MANF	sp|P55145|MANF_HUMAN Mesencephalic astrocyte-derived neurotrophic factor OS=Homo sapiens OX=9606 GN=MANF PE=1 SV=3	1	3	3	3	1	0	0	0	0	2	0	1	0	0	0	0	2	0	1	0	0	0	0	2	0	22.5	22.5	22.5	20.7	182	182	0	5.3673	By MS/MS					By MS/MS		9.3	0
P55209	P55209	5	4	4	Nucleosome assembly protein 1-like 1	NAP1L1	sp|P55209|NP1L1_HUMAN Nucleosome assembly protein 1-like 1 OS=Homo sapiens OX=9606 GN=NAP1L1 PE=1 SV=1	1	5	4	4	3	0	2	3	3	4	2	2	0	1	2	2	3	1	2	0	1	2	2	3	1	17.1	14.6	14.6	45.374	391	391	0	19.813	By MS/MS		By matching	By matching	By MS/MS	By MS/MS	By matching	9.7	0
P55263	P55263	4	4	4	Adenosine kinase	ADK	sp|P55263|ADK_HUMAN Adenosine kinase OS=Homo sapiens OX=9606 GN=ADK PE=1 SV=2	1	4	4	4	2	0	0	0	0	3	0	2	0	0	0	0	3	0	2	0	0	0	0	3	0	13	13	13	40.545	362	362	0	6.8228	By MS/MS					By MS/MS		7.7	0
P55265	P55265	2	2	2	Double-stranded RNA-specific adenosine deaminase	ADAR	sp|P55265|DSRAD_HUMAN Double-stranded RNA-specific adenosine deaminase OS=Homo sapiens OX=9606 GN=ADAR PE=1 SV=4	1	2	2	2	2	0	1	1	0	1	0	2	0	1	1	0	1	0	2	0	1	1	0	1	0	1.8	1.8	1.8	136.06	1226	1226	0.00064683	2.4259	By MS/MS		By matching	By matching		By MS/MS		1.8	0
P55327	P55327	6	6	6	Tumor protein D52	TPD52	sp|P55327|TPD52_HUMAN Tumor protein D52 OS=Homo sapiens OX=9606 GN=TPD52 PE=1 SV=2	1	6	6	6	5	0	2	2	4	5	3	5	0	2	2	4	5	3	5	0	2	2	4	5	3	42	42	42	24.327	224	224	0	67.497	By MS/MS		By matching	By MS/MS	By MS/MS	By MS/MS	By MS/MS	36.6	0
P55735	P55735	1	1	1	Protein SEC13 homolog	SEC13	sp|P55735|SEC13_HUMAN Protein SEC13 homolog OS=Homo sapiens OX=9606 GN=SEC13 PE=1 SV=3	1	1	1	1	1	0	0	1	1	1	0	1	0	0	1	1	1	0	1	0	0	1	1	1	0	3.4	3.4	3.4	35.54	322	322	0	3.8147	By MS/MS			By matching	By MS/MS	By MS/MS		3.4	0
P55769	P55769	5	5	5	NHP2-like protein 1;NHP2-like protein 1, N-terminally processed	NHP2L1	sp|P55769|NH2L1_HUMAN NHP2-like protein 1 OS=Homo sapiens OX=9606 GN=SNU13 PE=1 SV=3	1	5	5	5	4	0	4	3	4	5	1	4	0	4	3	4	5	1	4	0	4	3	4	5	1	46.1	46.1	46.1	14.173	128	128	0	47.222	By MS/MS		By matching	By MS/MS	By MS/MS	By MS/MS	By matching	39.8	0
P55786;A6NEC2	P55786	17;7	17;7	17;7	Puromycin-sensitive aminopeptidase	NPEPPS	sp|P55786|PSA_HUMAN Puromycin-sensitive aminopeptidase OS=Homo sapiens OX=9606 GN=NPEPPS PE=1 SV=2	2	17	17	17	11	0	3	3	8	12	1	11	0	3	3	8	12	1	11	0	3	3	8	12	1	22.2	22.2	22.2	103.28	919	919;478	0	56.095	By MS/MS		By matching	By matching	By MS/MS	By MS/MS	By matching	15.2	0
P55795	P55795	8	1	1	Heterogeneous nuclear ribonucleoprotein H2	HNRNPH2	sp|P55795|HNRH2_HUMAN Heterogeneous nuclear ribonucleoprotein H2 OS=Homo sapiens OX=9606 GN=HNRNPH2 PE=1 SV=1	1	8	1	1	4	0	3	3	4	6	4	1	0	0	0	1	0	0	1	0	0	0	1	0	0	18	2	2	49.263	449	449	0.0085861	1.383	By MS/MS		By matching	By matching	By matching	By matching	By matching	11.6	0
P55809	P55809	10	10	10	Succinyl-CoA:3-ketoacid coenzyme A transferase 1, mitochondrial	OXCT1	sp|P55809|SCOT1_HUMAN Succinyl-CoA:3-ketoacid coenzyme A transferase 1, mitochondrial OS=Homo sapiens OX=9606 GN=OXCT1 PE=1 SV=1	1	10	10	10	7	0	3	2	1	8	3	7	0	3	2	1	8	3	7	0	3	2	1	8	3	23.8	23.8	23.8	56.157	520	520	0	74.635	By MS/MS		By MS/MS	By MS/MS	By MS/MS	By MS/MS	By MS/MS	18.1	0
P55854	P55854	2	1	1	Small ubiquitin-related modifier 3	SUMO3	sp|P55854|SUMO3_HUMAN Small ubiquitin-related modifier 3 OS=Homo sapiens OX=9606 GN=SUMO3 PE=1 SV=2	1	2	1	1	2	0	1	1	1	2	1	1	0	0	0	0	1	0	1	0	0	0	0	1	0	20.4	8.7	8.7	11.637	103	103	0.0012723	2.2551	By matching		By matching	By matching	By matching	By MS/MS	By matching	20.4	0
P55884	P55884	17	17	17	Eukaryotic translation initiation factor 3 subunit B	EIF3B	sp|P55884|EIF3B_HUMAN Eukaryotic translation initiation factor 3 subunit B OS=Homo sapiens OX=9606 GN=EIF3B PE=1 SV=3	1	17	17	17	5	0	2	1	2	16	3	5	0	2	1	2	16	3	5	0	2	1	2	16	3	24.1	24.1	24.1	92.48	814	814	0	68.025	By MS/MS		By matching	By matching	By matching	By MS/MS	By matching	9.5	0
P56182	P56182	2	2	2	Ribosomal RNA processing protein 1 homolog A	RRP1	sp|P56182|RRP1_HUMAN Ribosomal RNA processing protein 1 homolog A OS=Homo sapiens OX=9606 GN=RRP1 PE=1 SV=1	1	2	2	2	1	0	0	0	0	2	0	1	0	0	0	0	2	0	1	0	0	0	0	2	0	4.6	4.6	4.6	52.839	461	461	0	8.7954	By matching					By MS/MS		2	0
P56192	P56192	9	9	9	Methionine--tRNA ligase, cytoplasmic	MARS	sp|P56192|SYMC_HUMAN Methionine--tRNA ligase, cytoplasmic OS=Homo sapiens OX=9606 GN=MARS PE=1 SV=2	1	9	9	9	6	0	0	2	4	5	1	6	0	0	2	4	5	1	6	0	0	2	4	5	1	12.1	12.1	12.1	101.11	900	900	0	23.727	By MS/MS			By matching	By matching	By MS/MS	By matching	8.8	0
P56211	P56211	2	1	1	cAMP-regulated phosphoprotein 19	ARPP19	sp|P56211|ARP19_HUMAN cAMP-regulated phosphoprotein 19 OS=Homo sapiens OX=9606 GN=ARPP19 PE=1 SV=2	1	2	1	1	1	0	0	0	0	2	0	1	0	0	0	0	1	0	1	0	0	0	0	1	0	25	15.2	15.2	12.323	112	112	0	4.9507	By MS/MS					By MS/MS		15.2	0
Q5VTU8;P56381	Q5VTU8;P56381	2;2	2;2	2;2	ATP synthase subunit epsilon-like protein, mitochondrial;ATP synthase subunit epsilon, mitochondrial	ATP5EP2;ATP5E	sp|Q5VTU8|AT5EL_HUMAN ATP synthase subunit epsilon-like protein, mitochondrial OS=Homo sapiens OX=9606 GN=ATP5EP2 PE=3 SV=1;sp|P56381|ATP5E_HUMAN ATP synthase subunit epsilon, mitochondrial OS=Homo sapiens OX=9606 GN=ATP5F1E PE=1 SV=2	2	2	2	2	2	0	1	1	1	2	1	2	0	1	1	1	2	1	2	0	1	1	1	2	1	29.4	29.4	29.4	5.8068	51	51;51	0.0006398	2.309	By MS/MS		By matching	By matching	By MS/MS	By MS/MS	By matching	29.4	0
P56385	P56385	2	2	2	ATP synthase subunit e, mitochondrial	ATP5I	sp|P56385|ATP5I_HUMAN ATP synthase subunit e, mitochondrial OS=Homo sapiens OX=9606 GN=ATP5ME PE=1 SV=2	1	2	2	2	2	0	2	2	1	2	0	2	0	2	2	1	2	0	2	0	2	2	1	2	0	24.6	24.6	24.6	7.9331	69	69	0.0036652	1.8492	By MS/MS		By matching	By matching	By matching	By MS/MS		24.6	0
P56537	P56537	5	5	5	Eukaryotic translation initiation factor 6	EIF6	sp|P56537|IF6_HUMAN Eukaryotic translation initiation factor 6 OS=Homo sapiens OX=9606 GN=EIF6 PE=1 SV=1	1	5	5	5	5	0	2	2	2	4	1	5	0	2	2	2	4	1	5	0	2	2	2	4	1	32.7	32.7	32.7	26.599	245	245	0	26.223	By MS/MS		By matching	By matching	By matching	By MS/MS	By MS/MS	32.7	0
P56545;Q13363	P56545	3;1	3;1	3;1	C-terminal-binding protein 2	CTBP2	sp|P56545|CTBP2_HUMAN C-terminal-binding protein 2 OS=Homo sapiens OX=9606 GN=CTBP2 PE=1 SV=1	2	3	3	3	1	0	0	1	1	3	1	1	0	0	1	1	3	1	1	0	0	1	1	3	1	6.5	6.5	6.5	48.944	445	445;440	0	4.5441	By matching			By matching	By matching	By MS/MS	By matching	1.8	0
P57088	P57088	2	2	2	Transmembrane protein 33	TMEM33	sp|P57088|TMM33_HUMAN Transmembrane protein 33 OS=Homo sapiens OX=9606 GN=TMEM33 PE=1 SV=2	1	2	2	2	0	0	0	0	0	2	0	0	0	0	0	0	2	0	0	0	0	0	0	2	0	8.9	8.9	8.9	27.978	247	247	0	12.141						By MS/MS		0	0
P58107	P58107	73	66	66	Epiplakin	EPPK1	sp|P58107|EPIPL_HUMAN Epiplakin OS=Homo sapiens OX=9606 GN=EPPK1 PE=1 SV=3	1	73	66	66	56	1	13	16	37	44	18	50	0	9	11	31	39	13	50	0	9	11	31	39	13	47.7	40.4	40.4	555.65	5088	5088	0	323.31	By MS/MS	By matching	By MS/MS	By MS/MS	By MS/MS	By MS/MS	By MS/MS	39.9	1
P58546	P58546	4	4	4	Myotrophin	MTPN	sp|P58546|MTPN_HUMAN Myotrophin OS=Homo sapiens OX=9606 GN=MTPN PE=1 SV=2	1	4	4	4	4	0	0	0	2	2	2	4	0	0	0	2	2	2	4	0	0	0	2	2	2	55.9	55.9	55.9	12.895	118	118	0	38.361	By MS/MS				By MS/MS	By MS/MS	By matching	55.9	0
P59998	P59998	6	6	6	Actin-related protein 2/3 complex subunit 4	ARPC4	sp|P59998|ARPC4_HUMAN Actin-related protein 2/3 complex subunit 4 OS=Homo sapiens OX=9606 GN=ARPC4 PE=1 SV=3	1	6	6	6	6	0	3	3	5	4	4	6	0	3	3	5	4	4	6	0	3	3	5	4	4	41.1	41.1	41.1	19.667	168	168	0	48.86	By MS/MS		By matching	By matching	By MS/MS	By MS/MS	By MS/MS	41.1	0
P60174	P60174	17	17	17	Triosephosphate isomerase	TPI1	sp|P60174|TPIS_HUMAN Triosephosphate isomerase OS=Homo sapiens OX=9606 GN=TPI1 PE=1 SV=3	1	17	17	17	16	0	15	14	16	16	11	16	0	15	14	16	16	11	16	0	15	14	16	16	11	73.8	73.8	73.8	30.791	286	286	0	323.31	By MS/MS		By MS/MS	By MS/MS	By MS/MS	By MS/MS	By MS/MS	71.3	0
P60228	P60228	9	9	9	Eukaryotic translation initiation factor 3 subunit E	EIF3E	sp|P60228|EIF3E_HUMAN Eukaryotic translation initiation factor 3 subunit E OS=Homo sapiens OX=9606 GN=EIF3E PE=1 SV=1	1	9	9	9	3	0	0	1	3	8	1	3	0	0	1	3	8	1	3	0	0	1	3	8	1	21.6	21.6	21.6	52.22	445	445	0	21.132	By MS/MS			By matching	By matching	By MS/MS	By matching	6.7	0
P60468	P60468	3	3	3	Protein transport protein Sec61 subunit beta	SEC61B	sp|P60468|SC61B_HUMAN Protein transport protein Sec61 subunit beta OS=Homo sapiens OX=9606 GN=SEC61B PE=1 SV=2	1	3	3	3	1	0	1	0	1	3	0	1	0	1	0	1	3	0	1	0	1	0	1	3	0	37.5	37.5	37.5	9.9743	96	96	0	8.6872	By MS/MS		By matching		By MS/MS	By MS/MS		15.6	0
P60660;P14649	P60660	8;2	8;2	8;2	Myosin light polypeptide 6	MYL6	sp|P60660|MYL6_HUMAN Myosin light polypeptide 6 OS=Homo sapiens OX=9606 GN=MYL6 PE=1 SV=2	2	8	8	8	7	0	7	6	8	7	7	7	0	7	6	8	7	7	7	0	7	6	8	7	7	55.6	55.6	55.6	16.93	151	151;208	0	93.892	By MS/MS		By MS/MS	By MS/MS	By MS/MS	By MS/MS	By MS/MS	55.6	0
P60709;Q562R1;Q6S8J3;A5A3E0;P0CG38;P0CG39;Q9BYX7	P60709	34;10;10;9;8;6;4	1;0;0;0;0;0;0	1;0;0;0;0;0;0	Actin, cytoplasmic 1;Actin, cytoplasmic 1, N-terminally processed	ACTB	sp|P60709|ACTB_HUMAN Actin, cytoplasmic 1 OS=Homo sapiens OX=9606 GN=ACTB PE=1 SV=1	7	34	1	1	32	3	27	26	28	27	25	1	0	1	1	1	1	1	1	0	1	1	1	1	1	86.7	4.5	4.5	41.736	375	375;376;1075;1075;1075;1038;375	0	71.555	By MS/MS	By matching	By matching	By MS/MS	By MS/MS	By MS/MS	By MS/MS	86.7	8.3
P60842	P60842	18	18	7	Eukaryotic initiation factor 4A-I	EIF4A1	sp|P60842|IF4A1_HUMAN Eukaryotic initiation factor 4A-I OS=Homo sapiens OX=9606 GN=EIF4A1 PE=1 SV=1	1	18	18	7	12	0	8	7	10	15	9	12	0	8	7	10	15	9	6	0	3	4	5	6	3	40.9	40.9	16.3	46.153	406	406	0	86.357	By MS/MS		By MS/MS	By MS/MS	By MS/MS	By MS/MS	By MS/MS	32	0
P60866	P60866	5	5	5	40S ribosomal protein S20	RPS20	sp|P60866|RS20_HUMAN 40S ribosomal protein S20 OS=Homo sapiens OX=9606 GN=RPS20 PE=1 SV=1	1	5	5	5	5	0	4	3	5	5	2	5	0	4	3	5	5	2	5	0	4	3	5	5	2	29.4	29.4	29.4	13.373	119	119	0	36.623	By MS/MS		By MS/MS	By MS/MS	By MS/MS	By MS/MS	By MS/MS	29.4	0
P60891;P21108;P11908	P60891;P21108	7;4;3	7;4;3	7;4;3	Ribose-phosphate pyrophosphokinase 1;Ribose-phosphate pyrophosphokinase 3	PRPS1;PRPS1L1	sp|P60891|PRPS1_HUMAN Ribose-phosphate pyrophosphokinase 1 OS=Homo sapiens OX=9606 GN=PRPS1 PE=1 SV=2;sp|P21108|PRPS3_HUMAN Ribose-phosphate pyrophosphokinase 3 OS=Homo sapiens OX=9606 GN=PRPS1L1 PE=1 SV=2	3	7	7	7	5	0	2	3	5	6	2	5	0	2	3	5	6	2	5	0	2	3	5	6	2	25.5	25.5	25.5	34.834	318	318;318;318	0	21.669	By MS/MS		By matching	By matching	By MS/MS	By MS/MS	By MS/MS	19.2	0
P60900	P60900	8	8	8	Proteasome subunit alpha type-6	PSMA6	sp|P60900|PSA6_HUMAN Proteasome subunit alpha type-6 OS=Homo sapiens OX=9606 GN=PSMA6 PE=1 SV=1	1	8	8	8	5	0	5	5	5	6	1	5	0	5	5	5	6	1	5	0	5	5	5	6	1	37.4	37.4	37.4	27.399	246	246	0	44.345	By MS/MS		By MS/MS	By MS/MS	By MS/MS	By MS/MS	By MS/MS	25.6	0
P60903	P60903	2	2	2	Protein S100-A10	S100A10	sp|P60903|S10AA_HUMAN Protein S100-A10 OS=Homo sapiens OX=9606 GN=S100A10 PE=1 SV=2	1	2	2	2	2	0	1	1	1	1	1	2	0	1	1	1	1	1	2	0	1	1	1	1	1	17.5	17.5	17.5	11.203	97	97	0	25.879	By MS/MS		By MS/MS	By MS/MS	By MS/MS	By MS/MS	By MS/MS	17.5	0
P60953;P17081;Q9H4E5	P60953	6;1;1	5;0;0	5;0;0	Cell division control protein 42 homolog	CDC42	sp|P60953|CDC42_HUMAN Cell division control protein 42 homolog OS=Homo sapiens OX=9606 GN=CDC42 PE=1 SV=2	3	6	5	5	5	0	2	2	4	5	2	4	0	2	2	4	4	1	4	0	2	2	4	4	1	38.2	32.5	32.5	21.258	191	191;205;214	0	39.565	By MS/MS		By MS/MS	By matching	By MS/MS	By MS/MS	By MS/MS	32.5	0
P60981	P60981	12	12	12	Destrin	DSTN	sp|P60981|DEST_HUMAN Destrin OS=Homo sapiens OX=9606 GN=DSTN PE=1 SV=3	1	12	12	12	10	0	3	2	10	9	5	10	0	3	2	10	9	5	10	0	3	2	10	9	5	64.2	64.2	64.2	18.506	165	165	0	66.485	By MS/MS		By MS/MS	By MS/MS	By MS/MS	By MS/MS	By MS/MS	61.8	0
P61006	P61006	4	2	2	Ras-related protein Rab-8A	RAB8A	sp|P61006|RAB8A_HUMAN Ras-related protein Rab-8A OS=Homo sapiens OX=9606 GN=RAB8A PE=1 SV=1	1	4	2	2	2	0	0	0	1	4	1	1	0	0	0	0	2	0	1	0	0	0	0	2	0	21.3	12.6	12.6	23.668	207	207	0	14.443	By matching				By matching	By MS/MS	By matching	12.1	0
P61009	P61009	1	1	1	Signal peptidase complex subunit 3	SPCS3	sp|P61009|SPCS3_HUMAN Signal peptidase complex subunit 3 OS=Homo sapiens OX=9606 GN=SPCS3 PE=1 SV=1	1	1	1	1	1	0	0	1	1	1	0	1	0	0	1	1	1	0	1	0	0	1	1	1	0	5	5	5	20.313	180	180	0.0012771	2.2981	By MS/MS			By matching	By matching	By MS/MS		5	0
P61019;Q8WUD1	P61019	4;1	4;1	4;1	Ras-related protein Rab-2A	RAB2A	sp|P61019|RAB2A_HUMAN Ras-related protein Rab-2A OS=Homo sapiens OX=9606 GN=RAB2A PE=1 SV=1	2	4	4	4	2	0	0	0	2	3	0	2	0	0	0	2	3	0	2	0	0	0	2	3	0	23.6	23.6	23.6	23.545	212	212;216	0	12.659	By MS/MS				By MS/MS	By MS/MS		11.8	0
P61024	P61024	1	1	1	Cyclin-dependent kinases regulatory subunit 1	CKS1B	sp|P61024|CKS1_HUMAN Cyclin-dependent kinases regulatory subunit 1 OS=Homo sapiens OX=9606 GN=CKS1B PE=1 SV=1	1	1	1	1	0	0	0	0	0	1	0	0	0	0	0	0	1	0	0	0	0	0	0	1	0	20.3	20.3	20.3	9.6601	79	79	0	3.8882						By MS/MS		0	0
P61026	P61026	4	3	3	Ras-related protein Rab-10	RAB10	sp|P61026|RAB10_HUMAN Ras-related protein Rab-10 OS=Homo sapiens OX=9606 GN=RAB10 PE=1 SV=1	1	4	3	3	3	0	1	0	2	3	1	2	0	1	0	1	2	0	2	0	1	0	1	2	0	22	16.5	16.5	22.541	200	200	0	10.061	By MS/MS		By matching		By matching	By MS/MS	By matching	17	0
P62837;P61077;Q9Y2X8;P51668	P62837;P61077;Q9Y2X8;P51668	2;2;1;1	2;2;1;1	2;2;1;1	Ubiquitin-conjugating enzyme E2 D2;Ubiquitin-conjugating enzyme E2 D3;Ubiquitin-conjugating enzyme E2 D4;Ubiquitin-conjugating enzyme E2 D1	UBE2D2;UBE2D3;UBE2D4;UBE2D1	sp|P62837|UB2D2_HUMAN Ubiquitin-conjugating enzyme E2 D2 OS=Homo sapiens OX=9606 GN=UBE2D2 PE=1 SV=1;sp|P61077|UB2D3_HUMAN Ubiquitin-conjugating enzyme E2 D3 OS=Homo sapiens OX=9606 GN=UBE2D3 PE=1 SV=1;sp|Q9Y2X8|UB2D4_HUMAN Ubiquitin-conjugating enzyme E2	4	2	2	2	1	0	0	0	0	1	0	1	0	0	0	0	1	0	1	0	0	0	0	1	0	19.7	19.7	19.7	16.735	147	147;147;147;147	0	10.147	By MS/MS					By MS/MS		12.2	0
P61081	P61081	5	5	5	NEDD8-conjugating enzyme Ubc12	UBE2M	sp|P61081|UBC12_HUMAN NEDD8-conjugating enzyme Ubc12 OS=Homo sapiens OX=9606 GN=UBE2M PE=1 SV=1	1	5	5	5	3	0	1	1	2	4	1	3	0	1	1	2	4	1	3	0	1	1	2	4	1	27.3	27.3	27.3	20.9	183	183	0	10.126	By MS/MS		By matching	By matching	By matching	By MS/MS	By matching	15.3	0
P61086	P61086	3	3	3	Ubiquitin-conjugating enzyme E2 K	UBE2K	sp|P61086|UBE2K_HUMAN Ubiquitin-conjugating enzyme E2 K OS=Homo sapiens OX=9606 GN=UBE2K PE=1 SV=3	1	3	3	3	2	0	0	0	1	1	0	2	0	0	0	1	1	0	2	0	0	0	1	1	0	18.5	18.5	18.5	22.406	200	200	0	4.0902	By MS/MS				By MS/MS	By MS/MS		11	0
P61088;Q5JXB2	P61088;Q5JXB2	6;4	6;4	6;4	Ubiquitin-conjugating enzyme E2 N;Putative ubiquitin-conjugating enzyme E2 N-like	UBE2N;UBE2NL	sp|P61088|UBE2N_HUMAN Ubiquitin-conjugating enzyme E2 N OS=Homo sapiens OX=9606 GN=UBE2N PE=1 SV=1;sp|Q5JXB2|UE2NL_HUMAN Putative ubiquitin-conjugating enzyme E2 N-like OS=Homo sapiens OX=9606 GN=UBE2NL PE=1 SV=1	2	6	6	6	4	0	2	2	4	6	3	4	0	2	2	4	6	3	4	0	2	2	4	6	3	42.1	42.1	42.1	17.138	152	152;153	0	41.936	By MS/MS		By matching	By MS/MS	By MS/MS	By MS/MS	By MS/MS	31.6	0
P61106	P61106	9	9	9	Ras-related protein Rab-14	RAB14	sp|P61106|RAB14_HUMAN Ras-related protein Rab-14 OS=Homo sapiens OX=9606 GN=RAB14 PE=1 SV=4	1	9	9	9	7	0	5	5	7	6	2	7	0	5	5	7	6	2	7	0	5	5	7	6	2	53.5	53.5	53.5	23.897	215	215	0	82.182	By MS/MS		By MS/MS	By matching	By MS/MS	By MS/MS	By matching	43.7	0
P61158;Q9P1U1;Q9C0K3	P61158	12;2;1	12;2;1	12;2;1	Actin-related protein 3	ACTR3	sp|P61158|ARP3_HUMAN Actin-related protein 3 OS=Homo sapiens OX=9606 GN=ACTR3 PE=1 SV=3	3	12	12	12	10	0	1	2	9	9	8	10	0	1	2	9	9	8	10	0	1	2	9	9	8	36.6	36.6	36.6	47.371	418	418;418;210	0	93.551	By MS/MS		By matching	By matching	By MS/MS	By MS/MS	By MS/MS	34.9	0
P61160	P61160	7	7	7	Actin-related protein 2	ACTR2	sp|P61160|ARP2_HUMAN Actin-related protein 2 OS=Homo sapiens OX=9606 GN=ACTR2 PE=1 SV=1	1	7	7	7	3	0	1	1	2	6	2	3	0	1	1	2	6	2	3	0	1	1	2	6	2	21.8	21.8	21.8	44.76	394	394	0	48.637	By MS/MS		By matching	By matching	By MS/MS	By MS/MS	By MS/MS	8.4	0
P61163;P42025	P61163;P42025	7;5	7;5	7;5	Alpha-centractin;Beta-centractin	ACTR1A;ACTR1B	sp|P61163|ACTZ_HUMAN Alpha-centractin OS=Homo sapiens OX=9606 GN=ACTR1A PE=1 SV=1;sp|P42025|ACTY_HUMAN Beta-centractin OS=Homo sapiens OX=9606 GN=ACTR1B PE=1 SV=1	2	7	7	7	6	0	0	3	5	4	0	6	0	0	3	5	4	0	6	0	0	3	5	4	0	22.3	22.3	22.3	42.613	376	376;376	0	23.842	By MS/MS			By matching	By matching	By MS/MS		20.2	0
P61201	P61201	4	4	4	COP9 signalosome complex subunit 2	COPS2	sp|P61201|CSN2_HUMAN COP9 signalosome complex subunit 2 OS=Homo sapiens OX=9606 GN=COPS2 PE=1 SV=1	1	4	4	4	2	0	0	1	1	3	0	2	0	0	1	1	3	0	2	0	0	1	1	3	0	8.6	8.6	8.6	51.596	443	443	0	13.431	By MS/MS			By matching	By matching	By MS/MS		5	0
P84077;P61204	P84077;P61204	8;8	8;8	3;3	ADP-ribosylation factor 1;ADP-ribosylation factor 3	ARF1;ARF3	sp|P84077|ARF1_HUMAN ADP-ribosylation factor 1 OS=Homo sapiens OX=9606 GN=ARF1 PE=1 SV=2;sp|P61204|ARF3_HUMAN ADP-ribosylation factor 3 OS=Homo sapiens OX=9606 GN=ARF3 PE=1 SV=2	2	8	8	3	7	0	0	1	5	6	3	7	0	0	1	5	6	3	2	0	0	0	0	2	0	50.8	50.8	16.6	20.697	181	181;181	0	97.839	By MS/MS			By matching	By MS/MS	By MS/MS	By matching	47	0
P61221	P61221	7	7	7	ATP-binding cassette sub-family E member 1	ABCE1	sp|P61221|ABCE1_HUMAN ATP-binding cassette sub-family E member 1 OS=Homo sapiens OX=9606 GN=ABCE1 PE=1 SV=1	1	7	7	7	4	0	1	0	1	6	0	4	0	1	0	1	6	0	4	0	1	0	1	6	0	15.2	15.2	15.2	67.314	599	599	0	23.566	By MS/MS		By matching		By matching	By MS/MS		9.8	0
P61224;A6NIZ1;O95716	P61224;A6NIZ1	9;7;1	9;7;1	1;1;0	Ras-related protein Rap-1b;Ras-related protein Rap-1b-like protein	RAP1B	sp|P61224|RAP1B_HUMAN Ras-related protein Rap-1b OS=Homo sapiens OX=9606 GN=RAP1B PE=1 SV=1;sp|A6NIZ1|RP1BL_HUMAN Ras-related protein Rap-1b-like protein OS=Homo sapiens OX=9606 PE=2 SV=1	3	9	9	1	5	0	2	1	4	7	2	5	0	2	1	4	7	2	1	0	1	0	1	1	0	44	44	7.1	20.825	184	184;184;219	0	26.79	By MS/MS		By MS/MS	By MS/MS	By MS/MS	By MS/MS	By MS/MS	31.5	0
P61247	P61247	17	17	17	40S ribosomal protein S3a	RPS3A	sp|P61247|RS3A_HUMAN 40S ribosomal protein S3a OS=Homo sapiens OX=9606 GN=RPS3A PE=1 SV=2	1	17	17	17	13	0	9	7	13	15	8	13	0	9	7	13	15	8	13	0	9	7	13	15	8	58.7	58.7	58.7	29.945	264	264	0	145.91	By MS/MS		By MS/MS	By MS/MS	By MS/MS	By MS/MS	By MS/MS	48.9	0
P61254;Q9UNX3;Q2PPJ7	P61254;Q9UNX3	9;7;1	9;7;1	9;7;1	60S ribosomal protein L26;60S ribosomal protein L26-like 1	RPL26;RPL26L1	sp|P61254|RL26_HUMAN 60S ribosomal protein L26 OS=Homo sapiens OX=9606 GN=RPL26 PE=1 SV=1;sp|Q9UNX3|RL26L_HUMAN 60S ribosomal protein L26-like 1 OS=Homo sapiens OX=9606 GN=RPL26L1 PE=1 SV=1	3	9	9	9	7	1	5	5	5	9	4	7	1	5	5	5	9	4	7	1	5	5	5	9	4	49	49	49	17.258	145	145;145;1873	0	17.619	By MS/MS	By matching	By MS/MS	By MS/MS	By MS/MS	By MS/MS	By MS/MS	42.8	4.1
P61289	P61289	2	2	2	Proteasome activator complex subunit 3	PSME3	sp|P61289|PSME3_HUMAN Proteasome activator complex subunit 3 OS=Homo sapiens OX=9606 GN=PSME3 PE=1 SV=1	1	2	2	2	1	0	0	0	0	2	0	1	0	0	0	0	2	0	1	0	0	0	0	2	0	9.8	9.8	9.8	29.506	254	254	0	8.5854	By MS/MS					By MS/MS		4.3	0
P61313	P61313	12	12	12	60S ribosomal protein L15	RPL15	sp|P61313|RL15_HUMAN 60S ribosomal protein L15 OS=Homo sapiens OX=9606 GN=RPL15 PE=1 SV=2	1	12	12	12	6	0	6	3	6	12	3	6	0	6	3	6	12	3	6	0	6	3	6	12	3	46.6	46.6	46.6	24.146	204	204	0	46.195	By MS/MS		By MS/MS	By MS/MS	By MS/MS	By MS/MS	By MS/MS	31.4	0
P61326;Q96A72	P61326;Q96A72	3;3	3;3	3;3	Protein mago nashi homolog;Protein mago nashi homolog 2	MAGOH;MAGOHB	sp|P61326|MGN_HUMAN Protein mago nashi homolog OS=Homo sapiens OX=9606 GN=MAGOH PE=1 SV=1;sp|Q96A72|MGN2_HUMAN Protein mago nashi homolog 2 OS=Homo sapiens OX=9606 GN=MAGOHB PE=1 SV=1	2	3	3	3	3	0	1	1	1	1	0	3	0	1	1	1	1	0	3	0	1	1	1	1	0	24.7	24.7	24.7	17.163	146	146;148	0	10.318	By MS/MS		By matching	By matching	By matching	By matching		24.7	0
P61353	P61353	7	7	7	60S ribosomal protein L27	RPL27	sp|P61353|RL27_HUMAN 60S ribosomal protein L27 OS=Homo sapiens OX=9606 GN=RPL27 PE=1 SV=2	1	7	7	7	7	0	5	5	6	5	3	7	0	5	5	6	5	3	7	0	5	5	6	5	3	49.3	49.3	49.3	15.798	136	136	0	36.44	By MS/MS		By MS/MS	By MS/MS	By MS/MS	By MS/MS	By MS/MS	49.3	0
P61421	P61421	1	1	1	V-type proton ATPase subunit d 1	ATP6V0D1	sp|P61421|VA0D1_HUMAN V-type proton ATPase subunit d 1 OS=Homo sapiens OX=9606 GN=ATP6V0D1 PE=1 SV=1	1	1	1	1	1	0	0	0	1	1	0	1	0	0	0	1	1	0	1	0	0	0	1	1	0	3.7	3.7	3.7	40.329	351	351	0.0012594	2.1738	By MS/MS				By matching	By MS/MS		3.7	0
P61513;A6NKH3	P61513	6;1	6;1	6;1	60S ribosomal protein L37a	RPL37A	sp|P61513|RL37A_HUMAN 60S ribosomal protein L37a OS=Homo sapiens OX=9606 GN=RPL37A PE=1 SV=2	2	6	6	6	5	1	2	1	2	6	2	5	1	2	1	2	6	2	5	1	2	1	2	6	2	58.7	58.7	58.7	10.275	92	92;93	0	14.88	By MS/MS	By matching	By MS/MS	By matching	By MS/MS	By MS/MS	By MS/MS	45.7	8.7
P61586;P62745	P61586	9;1	9;1	3;0	Transforming protein RhoA	RHOA	sp|P61586|RHOA_HUMAN Transforming protein RhoA OS=Homo sapiens OX=9606 GN=RHOA PE=1 SV=1	2	9	9	3	7	0	3	3	6	6	2	7	0	3	3	6	6	2	1	0	0	0	0	3	1	36.8	36.8	14	21.768	193	193;196	0	34.479	By MS/MS		By matching	By matching	By MS/MS	By MS/MS	By matching	30.6	0
P61604	P61604	9	9	9	10 kDa heat shock protein, mitochondrial	HSPE1	sp|P61604|CH10_HUMAN 10 kDa heat shock protein, mitochondrial OS=Homo sapiens OX=9606 GN=HSPE1 PE=1 SV=2	1	9	9	9	8	0	7	7	7	8	6	8	0	7	7	7	8	6	8	0	7	7	7	8	6	65.7	65.7	65.7	10.932	102	102	0	32.873	By MS/MS		By MS/MS	By MS/MS	By MS/MS	By MS/MS	By MS/MS	65.7	0
P61619;Q9H9S3	P61619;Q9H9S3	4;2	4;2	4;2	Protein transport protein Sec61 subunit alpha isoform 1;Protein transport protein Sec61 subunit alpha isoform 2	SEC61A1;SEC61A2	sp|P61619|S61A1_HUMAN Protein transport protein Sec61 subunit alpha isoform 1 OS=Homo sapiens OX=9606 GN=SEC61A1 PE=1 SV=2;sp|Q9H9S3|S61A2_HUMAN Protein transport protein Sec61 subunit alpha isoform 2 OS=Homo sapiens OX=9606 GN=SEC61A2 PE=2 SV=3	2	4	4	4	3	0	0	0	1	2	0	3	0	0	0	1	2	0	3	0	0	0	1	2	0	8.8	8.8	8.8	52.264	476	476;476	0	7.3471	By MS/MS				By matching	By MS/MS		8.4	0
P61758	P61758	4	4	4	Prefoldin subunit 3	VBP1	sp|P61758|PFD3_HUMAN Prefoldin subunit 3 OS=Homo sapiens OX=9606 GN=VBP1 PE=1 SV=3	1	4	4	4	3	0	0	1	2	2	0	3	0	0	1	2	2	0	3	0	0	1	2	2	0	24.4	24.4	24.4	22.658	197	197	0	6.4741	By MS/MS			By matching	By matching	By MS/MS		20.8	0
P61769	P61769	4	4	4	Beta-2-microglobulin;Beta-2-microglobulin form pI 5.3	B2M	sp|P61769|B2MG_HUMAN Beta-2-microglobulin OS=Homo sapiens OX=9606 GN=B2M PE=1 SV=1	1	4	4	4	4	0	4	3	4	3	1	4	0	4	3	4	3	1	4	0	4	3	4	3	1	40.3	40.3	40.3	13.714	119	119	0	27.441	By MS/MS		By MS/MS	By MS/MS	By MS/MS	By MS/MS	By matching	40.3	0
P61803	P61803	3	3	3	Dolichyl-diphosphooligosaccharide--protein glycosyltransferase subunit DAD1	DAD1	sp|P61803|DAD1_HUMAN Dolichyl-diphosphooligosaccharide--protein glycosyltransferase subunit DAD1 OS=Homo sapiens OX=9606 GN=DAD1 PE=1 SV=3	1	3	3	3	1	0	0	0	0	3	0	1	0	0	0	0	3	0	1	0	0	0	0	3	0	26.5	26.5	26.5	12.497	113	113	0	11.514	By MS/MS					By MS/MS		7.1	0
P61923	P61923	2	2	2	Coatomer subunit zeta-1	COPZ1	sp|P61923|COPZ1_HUMAN Coatomer subunit zeta-1 OS=Homo sapiens OX=9606 GN=COPZ1 PE=1 SV=1	1	2	2	2	1	0	0	0	1	2	1	1	0	0	0	1	2	1	1	0	0	0	1	2	1	18.6	18.6	18.6	20.198	177	177	0	5.4142	By MS/MS				By matching	By MS/MS	By matching	13	0
P61956;Q6EEV6	P61956;Q6EEV6	2;1	2;1	1;0	Small ubiquitin-related modifier 2;Small ubiquitin-related modifier 4	SUMO2;SUMO4	sp|P61956|SUMO2_HUMAN Small ubiquitin-related modifier 2 OS=Homo sapiens OX=9606 GN=SUMO2 PE=1 SV=3;sp|Q6EEV6|SUMO4_HUMAN Small ubiquitin-related modifier 4 OS=Homo sapiens OX=9606 GN=SUMO4 PE=1 SV=2	2	2	2	1	2	0	2	2	2	2	2	2	0	2	2	2	2	2	1	0	1	1	1	1	1	23.2	23.2	10.5	10.871	95	95;95	0	19.905	By MS/MS		By MS/MS	By MS/MS	By MS/MS	By MS/MS	By MS/MS	23.2	0
P61960	P61960	3	3	3	Ubiquitin-fold modifier 1	UFM1	sp|P61960|UFM1_HUMAN Ubiquitin-fold modifier 1 OS=Homo sapiens OX=9606 GN=UFM1 PE=1 SV=1	1	3	3	3	3	0	0	0	2	1	0	3	0	0	0	2	1	0	3	0	0	0	2	1	0	35.3	35.3	35.3	9.1175	85	85	0	3.4112	By MS/MS				By matching	By MS/MS		35.3	0
P61964	P61964	3	3	3	WD repeat-containing protein 5	WDR5	sp|P61964|WDR5_HUMAN WD repeat-containing protein 5 OS=Homo sapiens OX=9606 GN=WDR5 PE=1 SV=1	1	3	3	3	0	0	0	0	0	3	0	0	0	0	0	0	3	0	0	0	0	0	0	3	0	15	15	15	36.588	334	334	0	6.3083						By MS/MS		0	0
P61970	P61970	1	1	1	Nuclear transport factor 2	NUTF2	sp|P61970|NTF2_HUMAN Nuclear transport factor 2 OS=Homo sapiens OX=9606 GN=NUTF2 PE=1 SV=1	1	1	1	1	1	0	1	1	1	1	1	1	0	1	1	1	1	1	1	0	1	1	1	1	1	6.3	6.3	6.3	14.478	127	127	0.0085812	1.3827	By MS/MS		By matching	By matching	By MS/MS	By MS/MS	By matching	6.3	0
P61978	P61978	18	18	18	Heterogeneous nuclear ribonucleoprotein K	HNRNPK	sp|P61978|HNRPK_HUMAN Heterogeneous nuclear ribonucleoprotein K OS=Homo sapiens OX=9606 GN=HNRNPK PE=1 SV=1	1	18	18	18	15	0	10	9	11	13	6	15	0	10	9	11	13	6	15	0	10	9	11	13	6	50.3	50.3	50.3	50.976	463	463	0	251.44	By MS/MS		By MS/MS	By MS/MS	By MS/MS	By MS/MS	By MS/MS	46	0
P61981	P61981	12	9	8	14-3-3 protein gamma;14-3-3 protein gamma, N-terminally processed	YWHAG	sp|P61981|1433G_HUMAN 14-3-3 protein gamma OS=Homo sapiens OX=9606 GN=YWHAG PE=1 SV=2	1	12	9	8	8	1	7	7	6	12	7	6	0	5	5	4	9	5	6	0	5	5	4	8	5	51	40.9	37.2	28.302	247	247	0	119.8	By MS/MS	By matching	By MS/MS	By MS/MS	By MS/MS	By MS/MS	By MS/MS	36.4	4
P62081	P62081	9	9	9	40S ribosomal protein S7	RPS7	sp|P62081|RS7_HUMAN 40S ribosomal protein S7 OS=Homo sapiens OX=9606 GN=RPS7 PE=1 SV=1	1	9	9	9	8	0	4	4	3	6	2	8	0	4	4	3	6	2	8	0	4	4	3	6	2	56.7	56.7	56.7	22.127	194	194	0	83.688	By MS/MS		By MS/MS	By MS/MS	By MS/MS	By MS/MS	By MS/MS	52.1	0
P62136	P62136	13	13	4	Serine/threonine-protein phosphatase PP1-alpha catalytic subunit	PPP1CA	sp|P62136|PP1A_HUMAN Serine/threonine-protein phosphatase PP1-alpha catalytic subunit OS=Homo sapiens OX=9606 GN=PPP1CA PE=1 SV=1	1	13	13	4	11	0	1	1	7	6	2	11	0	1	1	7	6	2	4	0	1	1	3	3	1	51.8	51.8	14.5	37.512	330	330	0	66.713	By MS/MS		By matching	By matching	By matching	By MS/MS	By matching	46.1	0
P62140	P62140	13	5	5	Serine/threonine-protein phosphatase PP1-beta catalytic subunit	PPP1CB	sp|P62140|PP1B_HUMAN Serine/threonine-protein phosphatase PP1-beta catalytic subunit OS=Homo sapiens OX=9606 GN=PPP1CB PE=1 SV=3	1	13	5	5	10	0	0	1	6	6	2	4	0	0	1	3	3	1	4	0	0	1	3	3	1	51.1	19.9	19.9	37.186	327	327	0	20.494	By MS/MS			By matching	By MS/MS	By MS/MS	By matching	42.2	0
P62191	P62191	9	9	9	26S protease regulatory subunit 4	PSMC1	sp|P62191|PRS4_HUMAN 26S proteasome regulatory subunit 4 OS=Homo sapiens OX=9606 GN=PSMC1 PE=1 SV=1	1	9	9	9	7	0	1	3	7	7	2	7	0	1	3	7	7	2	7	0	1	3	7	7	2	24.8	24.8	24.8	49.184	440	440	0	44.539	By MS/MS		By matching	By matching	By MS/MS	By MS/MS	By MS/MS	20.2	0
P62195;Q8NB90	P62195	6;1	6;1	6;1	26S protease regulatory subunit 8	PSMC5	sp|P62195|PRS8_HUMAN 26S proteasome regulatory subunit 8 OS=Homo sapiens OX=9606 GN=PSMC5 PE=1 SV=1	2	6	6	6	5	0	0	0	4	4	1	5	0	0	0	4	4	1	5	0	0	0	4	4	1	19.2	19.2	19.2	45.626	406	406;893	0	23.6	By MS/MS				By matching	By MS/MS	By matching	16	0
P62241	P62241	13	13	13	40S ribosomal protein S8	RPS8	sp|P62241|RS8_HUMAN 40S ribosomal protein S8 OS=Homo sapiens OX=9606 GN=RPS8 PE=1 SV=2	1	13	13	13	13	0	10	9	11	12	9	13	0	10	9	11	12	9	13	0	10	9	11	12	9	58.7	58.7	58.7	24.205	208	208	0	187.57	By MS/MS		By MS/MS	By MS/MS	By MS/MS	By MS/MS	By MS/MS	58.7	0
P62244	P62244	7	7	7	40S ribosomal protein S15a	RPS15A	sp|P62244|RS15A_HUMAN 40S ribosomal protein S15a OS=Homo sapiens OX=9606 GN=RPS15A PE=1 SV=2	1	7	7	7	5	0	2	3	3	6	3	5	0	2	3	3	6	3	5	0	2	3	3	6	3	49.2	49.2	49.2	14.839	130	130	0	24.976	By MS/MS		By matching	By matching	By MS/MS	By MS/MS	By MS/MS	36.9	0
P62249	P62249	9	9	9	40S ribosomal protein S16	RPS16	sp|P62249|RS16_HUMAN 40S ribosomal protein S16 OS=Homo sapiens OX=9606 GN=RPS16 PE=1 SV=2	1	9	9	9	8	0	3	3	7	7	3	8	0	3	3	7	7	3	8	0	3	3	7	7	3	53.4	53.4	53.4	16.445	146	146	0	32.256	By MS/MS		By matching	By matching	By MS/MS	By MS/MS	By MS/MS	48.6	0
P62256	P62256	1	1	1	Ubiquitin-conjugating enzyme E2 H	UBE2H	sp|P62256|UBE2H_HUMAN Ubiquitin-conjugating enzyme E2 H OS=Homo sapiens OX=9606 GN=UBE2H PE=1 SV=1	1	1	1	1	0	0	0	0	0	1	0	0	0	0	0	0	1	0	0	0	0	0	0	1	0	8.2	8.2	8.2	20.655	183	183	0.00065445	2.5545						By MS/MS		0	0
P62258	P62258	19	19	16	14-3-3 protein epsilon	YWHAE	sp|P62258|1433E_HUMAN 14-3-3 protein epsilon OS=Homo sapiens OX=9606 GN=YWHAE PE=1 SV=1	1	19	19	16	14	1	13	11	12	18	10	14	1	13	11	12	18	10	12	0	11	9	10	15	8	67.8	67.8	58	29.174	255	255	0	146.61	By MS/MS	By matching	By MS/MS	By MS/MS	By MS/MS	By MS/MS	By MS/MS	55.7	3.9
P62263	P62263	6	6	6	40S ribosomal protein S14	RPS14	sp|P62263|RS14_HUMAN 40S ribosomal protein S14 OS=Homo sapiens OX=9606 GN=RPS14 PE=1 SV=3	1	6	6	6	5	0	4	4	5	5	3	5	0	4	4	5	5	3	5	0	4	4	5	5	3	38.4	38.4	38.4	16.273	151	151	0	40.972	By MS/MS		By MS/MS	By MS/MS	By MS/MS	By MS/MS	By MS/MS	24.5	0
P62266	P62266	6	6	6	40S ribosomal protein S23	RPS23	sp|P62266|RS23_HUMAN 40S ribosomal protein S23 OS=Homo sapiens OX=9606 GN=RPS23 PE=1 SV=3	1	6	6	6	5	0	3	4	4	6	3	5	0	3	4	4	6	3	5	0	3	4	4	6	3	48.3	48.3	48.3	15.807	143	143	0	17.662	By MS/MS		By MS/MS	By matching	By MS/MS	By MS/MS	By MS/MS	47.6	0
P62269	P62269	12	12	12	40S ribosomal protein S18	RPS18	sp|P62269|RS18_HUMAN 40S ribosomal protein S18 OS=Homo sapiens OX=9606 GN=RPS18 PE=1 SV=3	1	12	12	12	8	0	5	4	6	12	5	8	0	5	4	6	12	5	8	0	5	4	6	12	5	61.8	61.8	61.8	17.718	152	152	0	84.877	By MS/MS		By MS/MS	By MS/MS	By MS/MS	By MS/MS	By MS/MS	48.7	0
P62273	P62273	2	2	2	40S ribosomal protein S29	RPS29	sp|P62273|RS29_HUMAN 40S ribosomal protein S29 OS=Homo sapiens OX=9606 GN=RPS29 PE=1 SV=2	1	2	2	2	2	0	2	2	2	2	2	2	0	2	2	2	2	2	2	0	2	2	2	2	2	32.1	32.1	32.1	6.6767	56	56	0	23.861	By MS/MS		By MS/MS	By MS/MS	By MS/MS	By MS/MS	By MS/MS	32.1	0
P62277	P62277	6	6	6	40S ribosomal protein S13	RPS13	sp|P62277|RS13_HUMAN 40S ribosomal protein S13 OS=Homo sapiens OX=9606 GN=RPS13 PE=1 SV=2	1	6	6	6	4	0	3	4	4	6	3	4	0	3	4	4	6	3	4	0	3	4	4	6	3	35.8	35.8	35.8	17.222	151	151	0	27.934	By MS/MS		By matching	By MS/MS	By matching	By MS/MS	By MS/MS	23.2	0
P62280	P62280	14	14	14	40S ribosomal protein S11	RPS11	sp|P62280|RS11_HUMAN 40S ribosomal protein S11 OS=Homo sapiens OX=9606 GN=RPS11 PE=1 SV=3	1	14	14	14	8	0	9	9	8	13	8	8	0	9	9	8	13	8	8	0	9	9	8	13	8	58.2	58.2	58.2	18.431	158	158	0	44.715	By MS/MS		By MS/MS	By matching	By MS/MS	By MS/MS	By MS/MS	40.5	0
P62304	P62304	1	1	1	Small nuclear ribonucleoprotein E	SNRPE	sp|P62304|RUXE_HUMAN Small nuclear ribonucleoprotein E OS=Homo sapiens OX=9606 GN=SNRPE PE=1 SV=1	1	1	1	1	1	0	0	0	0	0	0	1	0	0	0	0	0	0	1	0	0	0	0	0	0	12	12	12	10.803	92	92	0.0096481	1.3491	By MS/MS							12	0
P62306	P62306	2	2	2	Small nuclear ribonucleoprotein F	SNRPF	sp|P62306|RUXF_HUMAN Small nuclear ribonucleoprotein F OS=Homo sapiens OX=9606 GN=SNRPF PE=1 SV=1	1	2	2	2	2	0	1	2	2	1	1	2	0	1	2	2	1	1	2	0	1	2	2	1	1	33.7	33.7	33.7	9.7251	86	86	0	8.4007	By MS/MS		By matching	By MS/MS	By MS/MS	By MS/MS	By MS/MS	33.7	0
P62310	P62310	1	1	1	U6 snRNA-associated Sm-like protein LSm3	LSM3	sp|P62310|LSM3_HUMAN U6 snRNA-associated Sm-like protein LSm3 OS=Homo sapiens OX=9606 GN=LSM3 PE=1 SV=2	1	1	1	1	1	0	0	0	0	1	0	1	0	0	0	0	1	0	1	0	0	0	0	1	0	11.8	11.8	11.8	11.845	102	102	0	6.4635	By MS/MS					By MS/MS		11.8	0
P62314	P62314	2	2	2	Small nuclear ribonucleoprotein Sm D1	SNRPD1	sp|P62314|SMD1_HUMAN Small nuclear ribonucleoprotein Sm D1 OS=Homo sapiens OX=9606 GN=SNRPD1 PE=1 SV=1	1	2	2	2	2	0	2	2	2	1	0	2	0	2	2	2	1	0	2	0	2	2	2	1	0	20.2	20.2	20.2	13.281	119	119	0	7.7417	By MS/MS		By MS/MS	By MS/MS	By MS/MS	By MS/MS		20.2	0
P62316	P62316	5	5	5	Small nuclear ribonucleoprotein Sm D2	SNRPD2	sp|P62316|SMD2_HUMAN Small nuclear ribonucleoprotein Sm D2 OS=Homo sapiens OX=9606 GN=SNRPD2 PE=1 SV=1	1	5	5	5	5	0	3	4	4	3	2	5	0	3	4	4	3	2	5	0	3	4	4	3	2	46.6	46.6	46.6	13.527	118	118	0	15.366	By MS/MS		By MS/MS	By MS/MS	By MS/MS	By MS/MS	By MS/MS	46.6	0
P62318	P62318	4	4	4	Small nuclear ribonucleoprotein Sm D3	SNRPD3	sp|P62318|SMD3_HUMAN Small nuclear ribonucleoprotein Sm D3 OS=Homo sapiens OX=9606 GN=SNRPD3 PE=1 SV=1	1	4	4	4	2	0	1	1	1	3	0	2	0	1	1	1	3	0	2	0	1	1	1	3	0	37.3	37.3	37.3	13.916	126	126	0	22.468	By MS/MS		By MS/MS	By matching	By MS/MS	By MS/MS		13.5	0
P62328;CON__P21752	P62328	7;1	7;1	6;0	Thymosin beta-4;Hematopoietic system regulatory peptide	TMSB4X	sp|P62328|TYB4_HUMAN Thymosin beta-4 OS=Homo sapiens OX=9606 GN=TMSB4X PE=1 SV=2	2	7	7	6	6	0	3	4	4	7	7	6	0	3	4	4	7	7	6	0	3	4	4	6	6	77.3	77.3	77.3	5.0526	44	44;42	0	37.436	By MS/MS		By MS/MS	By MS/MS	By MS/MS	By MS/MS	By MS/MS	77.3	0
P62333	P62333	9	9	9	26S protease regulatory subunit 10B	PSMC6	sp|P62333|PRS10_HUMAN 26S proteasome regulatory subunit 10B OS=Homo sapiens OX=9606 GN=PSMC6 PE=1 SV=1	1	9	9	9	7	0	1	1	3	8	1	7	0	1	1	3	8	1	7	0	1	1	3	8	1	25.7	25.7	25.7	44.172	389	389	0	35.701	By MS/MS		By matching	By matching	By matching	By MS/MS	By matching	19.5	0
P62424	P62424	13	13	13	60S ribosomal protein L7a	RPL7A	sp|P62424|RL7A_HUMAN 60S ribosomal protein L7a OS=Homo sapiens OX=9606 GN=RPL7A PE=1 SV=2	1	13	13	13	11	0	11	10	11	12	9	11	0	11	10	11	12	9	11	0	11	10	11	12	9	39.5	39.5	39.5	29.995	266	266	0	86.504	By MS/MS		By MS/MS	By MS/MS	By MS/MS	By MS/MS	By MS/MS	35.7	0
P62491;Q15907;P57735	P62491;Q15907	7;7;1	7;7;1	7;7;1	Ras-related protein Rab-11A;Ras-related protein Rab-11B	RAB11A;RAB11B	sp|P62491|RB11A_HUMAN Ras-related protein Rab-11A OS=Homo sapiens OX=9606 GN=RAB11A PE=1 SV=3;sp|Q15907|RB11B_HUMAN Ras-related protein Rab-11B OS=Homo sapiens OX=9606 GN=RAB11B PE=1 SV=4	3	7	7	7	5	0	3	2	5	6	5	5	0	3	2	5	6	5	5	0	3	2	5	6	5	31.5	31.5	31.5	24.393	216	216;218;213	0	30.304	By MS/MS		By matching	By MS/MS	By MS/MS	By MS/MS	By MS/MS	22.2	0
P62495	P62495	10	10	10	Eukaryotic peptide chain release factor subunit 1	ETF1	sp|P62495|ERF1_HUMAN Eukaryotic peptide chain release factor subunit 1 OS=Homo sapiens OX=9606 GN=ETF1 PE=1 SV=3	1	10	10	10	4	0	3	3	3	10	1	4	0	3	3	3	10	1	4	0	3	3	3	10	1	23.8	23.8	23.8	49.03	437	437	0	26.549	By MS/MS		By matching	By matching	By MS/MS	By MS/MS	By matching	10.1	0
P62633	P62633	4	4	4	Cellular nucleic acid-binding protein	CNBP	sp|P62633|CNBP_HUMAN Cellular nucleic acid-binding protein OS=Homo sapiens OX=9606 GN=CNBP PE=1 SV=1	1	4	4	4	4	0	3	2	3	4	0	4	0	3	2	3	4	0	4	0	3	2	3	4	0	27.1	27.1	27.1	19.463	177	177	0	18.92	By MS/MS		By matching	By matching	By matching	By MS/MS		27.1	0
P62701;Q8TD47;P22090	P62701;Q8TD47	18;9;8	18;9;8	18;9;8	40S ribosomal protein S4, X isoform;40S ribosomal protein S4, Y isoform 2	RPS4X;RPS4Y2	sp|P62701|RS4X_HUMAN 40S ribosomal protein S4, X isoform OS=Homo sapiens OX=9606 GN=RPS4X PE=1 SV=2;sp|Q8TD47|RS4Y2_HUMAN 40S ribosomal protein S4, Y isoform 2 OS=Homo sapiens OX=9606 GN=RPS4Y2 PE=2 SV=3	3	18	18	18	16	0	10	9	11	15	7	16	0	10	9	11	15	7	16	0	10	9	11	15	7	54.8	54.8	54.8	29.597	263	263;263;263	0	128.49	By MS/MS		By MS/MS	By MS/MS	By MS/MS	By MS/MS	By MS/MS	53.6	0
P62736;P63267	P62736;P63267	21;20	1;1	1;1	Actin, aortic smooth muscle;Actin, gamma-enteric smooth muscle	ACTA2;ACTG2	sp|P62736|ACTA_HUMAN Actin, aortic smooth muscle OS=Homo sapiens OX=9606 GN=ACTA2 PE=1 SV=1;sp|P63267|ACTH_HUMAN Actin, gamma-enteric smooth muscle OS=Homo sapiens OX=9606 GN=ACTG2 PE=1 SV=1	2	21	1	1	17	3	14	13	16	18	14	0	0	0	0	0	1	0	0	0	0	0	0	1	0	48.5	2.9	2.9	42.009	377	377;376	0.0012674	2.2159	By matching	By matching	By matching	By matching	By matching	By MS/MS	By matching	39.5	8.2
P62750	P62750	10	10	10	60S ribosomal protein L23a	RPL23A	sp|P62750|RL23A_HUMAN 60S ribosomal protein L23a OS=Homo sapiens OX=9606 GN=RPL23A PE=1 SV=1	1	10	10	10	8	0	5	4	5	8	4	8	0	5	4	5	8	4	8	0	5	4	5	8	4	48.1	48.1	48.1	17.695	156	156	0	77.569	By MS/MS		By MS/MS	By MS/MS	By MS/MS	By MS/MS	By MS/MS	36.5	0
P62753	P62753	9	9	9	40S ribosomal protein S6	RPS6	sp|P62753|RS6_HUMAN 40S ribosomal protein S6 OS=Homo sapiens OX=9606 GN=RPS6 PE=1 SV=1	1	9	9	9	3	0	3	2	2	8	2	3	0	3	2	2	8	2	3	0	3	2	2	8	2	33.3	33.3	33.3	28.68	249	249	0	69.998	By MS/MS		By MS/MS	By MS/MS	By MS/MS	By MS/MS	By MS/MS	15.3	0
P62805	P62805	13	13	13	Histone H4	HIST1H4A	sp|P62805|H4_HUMAN Histone H4 OS=Homo sapiens OX=9606 GN=HIST1H4A PE=1 SV=2	1	13	13	13	12	3	9	9	11	11	6	12	3	9	9	11	11	6	12	3	9	9	11	11	6	67	67	67	11.367	103	103	0	117.11	By MS/MS	By MS/MS	By MS/MS	By MS/MS	By MS/MS	By MS/MS	By MS/MS	60.2	29.1
P62820;Q92928;Q92930;P51153;P59190	P62820	10;4;2;1;1	10;4;2;1;1	3;0;0;0;0	Ras-related protein Rab-1A	RAB1A	sp|P62820|RAB1A_HUMAN Ras-related protein Rab-1A OS=Homo sapiens OX=9606 GN=RAB1A PE=1 SV=3	5	10	10	3	7	0	4	4	7	8	5	7	0	4	4	7	8	5	2	0	1	0	2	2	1	51.7	51.7	20.5	22.677	205	205;201;207;203;212	0	23.729	By MS/MS		By matching	By matching	By MS/MS	By MS/MS	By MS/MS	38.5	0
P62826	P62826	13	13	13	GTP-binding nuclear protein Ran	RAN	sp|P62826|RAN_HUMAN GTP-binding nuclear protein Ran OS=Homo sapiens OX=9606 GN=RAN PE=1 SV=3	1	13	13	13	10	0	9	9	10	12	8	10	0	9	9	10	12	8	10	0	9	9	10	12	8	51.9	51.9	51.9	24.423	216	216	0	73.296	By MS/MS		By MS/MS	By MS/MS	By MS/MS	By MS/MS	By MS/MS	42.6	0
P62829	P62829	4	4	4	60S ribosomal protein L23	RPL23	sp|P62829|RL23_HUMAN 60S ribosomal protein L23 OS=Homo sapiens OX=9606 GN=RPL23 PE=1 SV=1	1	4	4	4	4	0	0	2	3	2	1	4	0	0	2	3	2	1	4	0	0	2	3	2	1	37.9	37.9	37.9	14.865	140	140	0	43.248	By MS/MS			By MS/MS	By MS/MS	By MS/MS	By matching	37.9	0
P62834	P62834	9	1	1	Ras-related protein Rap-1A	RAP1A	sp|P62834|RAP1A_HUMAN Ras-related protein Rap-1A OS=Homo sapiens OX=9606 GN=RAP1A PE=1 SV=1	1	9	1	1	4	0	1	1	3	7	2	0	0	0	0	0	1	0	0	0	0	0	0	1	0	44	7.1	7.1	20.987	184	184	0.0042553	1.8165	By matching		By matching	By matching	By matching	By MS/MS	By matching	24.5	0
P62841	P62841	3	3	3	40S ribosomal protein S15	RPS15	sp|P62841|RS15_HUMAN 40S ribosomal protein S15 OS=Homo sapiens OX=9606 GN=RPS15 PE=1 SV=2	1	3	3	3	2	0	0	0	1	1	0	2	0	0	0	1	1	0	2	0	0	0	1	1	0	36.6	36.6	36.6	17.04	145	145	0	6.3653	By MS/MS				By matching	By MS/MS		27.6	0
P62847	P62847	1	1	1	40S ribosomal protein S24	RPS24	sp|P62847|RS24_HUMAN 40S ribosomal protein S24 OS=Homo sapiens OX=9606 GN=RPS24 PE=1 SV=1	1	1	1	1	1	0	1	0	1	0	0	1	0	1	0	1	0	0	1	0	1	0	1	0	0	9	9	9	15.423	133	133	0	3.4313	By MS/MS		By matching		By MS/MS			9	0
P62851	P62851	5	5	5	40S ribosomal protein S25	RPS25	sp|P62851|RS25_HUMAN 40S ribosomal protein S25 OS=Homo sapiens OX=9606 GN=RPS25 PE=1 SV=1	1	5	5	5	5	0	1	4	4	4	4	5	0	1	4	4	4	4	5	0	1	4	4	4	4	29.6	29.6	29.6	13.742	125	125	0	14.739	By MS/MS		By MS/MS	By MS/MS	By MS/MS	By MS/MS	By MS/MS	29.6	0
Q5JNZ5;P62854	Q5JNZ5;P62854	3;3	3;3	3;3	Putative 40S ribosomal protein S26-like 1;40S ribosomal protein S26	RPS26P11;RPS26	sp|Q5JNZ5|RS26L_HUMAN Putative 40S ribosomal protein S26-like 1 OS=Homo sapiens OX=9606 GN=RPS26P11 PE=5 SV=1;sp|P62854|RS26_HUMAN 40S ribosomal protein S26 OS=Homo sapiens OX=9606 GN=RPS26 PE=1 SV=3	2	3	3	3	1	0	1	2	2	2	3	1	0	1	2	2	2	3	1	0	1	2	2	2	3	24.3	24.3	24.3	13.002	115	115;115	0	11.153	By MS/MS		By matching	By matching	By MS/MS	By MS/MS	By MS/MS	10.4	0
P62857	P62857	3	3	3	40S ribosomal protein S28	RPS28	sp|P62857|RS28_HUMAN 40S ribosomal protein S28 OS=Homo sapiens OX=9606 GN=RPS28 PE=1 SV=1	1	3	3	3	1	0	1	1	1	3	3	1	0	1	1	1	3	3	1	0	1	1	1	3	3	46.4	46.4	46.4	7.8409	69	69	0	47.246	By MS/MS		By matching	By matching	By MS/MS	By MS/MS	By MS/MS	17.4	0
P62861	P62861	1	1	1	40S ribosomal protein S30	FAU	sp|P62861|RS30_HUMAN 40S ribosomal protein S30 OS=Homo sapiens OX=9606 GN=FAU PE=1 SV=1	1	1	1	1	1	0	1	1	1	1	1	1	0	1	1	1	1	1	1	0	1	1	1	1	1	16.9	16.9	16.9	6.6478	59	59	0	3.5099	By MS/MS		By MS/MS	By MS/MS	By MS/MS	By MS/MS	By MS/MS	16.9	0
P62873;P16520	P62873	7;2	7;2	3;0	Guanine nucleotide-binding protein G(I)/G(S)/G(T) subunit beta-1	GNB1	sp|P62873|GBB1_HUMAN Guanine nucleotide-binding protein G(I)/G(S)/G(T) subunit beta-1 OS=Homo sapiens OX=9606 GN=GNB1 PE=1 SV=3	2	7	7	3	3	1	3	2	3	7	3	3	1	3	2	3	7	3	1	0	1	1	1	3	1	22.6	22.6	11.5	37.377	340	340;340	0	17.355	By MS/MS	By matching	By MS/MS	By MS/MS	By MS/MS	By MS/MS	By MS/MS	8.5	2.1
P62877	P62877	1	1	1	E3 ubiquitin-protein ligase RBX1;E3 ubiquitin-protein ligase RBX1, N-terminally processed	RBX1	sp|P62877|RBX1_HUMAN E3 ubiquitin-protein ligase RBX1 OS=Homo sapiens OX=9606 GN=RBX1 PE=1 SV=1	1	1	1	1	1	0	1	0	1	1	1	1	0	1	0	1	1	1	1	0	1	0	1	1	1	7.4	7.4	7.4	12.274	108	108	0.0091116	1.3624	By MS/MS		By matching		By matching	By MS/MS	By matching	7.4	0
P62879	P62879	5	1	1	Guanine nucleotide-binding protein G(I)/G(S)/G(T) subunit beta-2	GNB2	sp|P62879|GBB2_HUMAN Guanine nucleotide-binding protein G(I)/G(S)/G(T) subunit beta-2 OS=Homo sapiens OX=9606 GN=GNB2 PE=1 SV=3	1	5	1	1	3	1	3	2	3	5	3	1	0	1	1	1	1	1	1	0	1	1	1	1	1	14.7	3.5	3.5	37.331	340	340	0	3.2199	By MS/MS	By matching	By matching	By matching	By matching	By MS/MS	By matching	8.5	2.1
P62888	P62888	7	7	7	60S ribosomal protein L30	RPL30	sp|P62888|RL30_HUMAN 60S ribosomal protein L30 OS=Homo sapiens OX=9606 GN=RPL30 PE=1 SV=2	1	7	7	7	4	1	3	3	3	6	3	4	1	3	3	3	6	3	4	1	3	3	3	6	3	66.1	66.1	66.1	12.784	115	115	0	73.09	By MS/MS	By matching	By MS/MS	By MS/MS	By MS/MS	By MS/MS	By MS/MS	47.8	7
Q59GN2;P62891	Q59GN2;P62891	1;1	1;1	1;1	Putative 60S ribosomal protein L39-like 5;60S ribosomal protein L39	RPL39P5;RPL39	sp|Q59GN2|R39L5_HUMAN Putative 60S ribosomal protein L39-like 5 OS=Homo sapiens OX=9606 GN=RPL39P5 PE=5 SV=2;sp|P62891|RL39_HUMAN 60S ribosomal protein L39 OS=Homo sapiens OX=9606 GN=RPL39 PE=1 SV=2	2	1	1	1	1	0	1	1	1	1	0	1	0	1	1	1	1	0	1	0	1	1	1	1	0	19.6	19.6	19.6	6.3225	51	51;51	0	4.1104	By MS/MS		By matching	By matching	By MS/MS	By MS/MS		19.6	0
P62899	P62899	6	6	6	60S ribosomal protein L31	RPL31	sp|P62899|RL31_HUMAN 60S ribosomal protein L31 OS=Homo sapiens OX=9606 GN=RPL31 PE=1 SV=1	1	6	6	6	4	0	3	4	4	5	1	4	0	3	4	4	5	1	4	0	3	4	4	5	1	40	40	40	14.463	125	125	0	16.526	By MS/MS		By MS/MS	By MS/MS	By MS/MS	By MS/MS	By MS/MS	22.4	0
P62906	P62906	12	12	12	60S ribosomal protein L10a	RPL10A	sp|P62906|RL10A_HUMAN 60S ribosomal protein L10a OS=Homo sapiens OX=9606 GN=RPL10A PE=1 SV=2	1	12	12	12	8	0	5	4	8	9	4	8	0	5	4	8	9	4	8	0	5	4	8	9	4	52.1	52.1	52.1	24.831	217	217	0	27.771	By MS/MS		By MS/MS	By matching	By MS/MS	By MS/MS	By MS/MS	45.6	0
P62910	P62910	5	5	5	60S ribosomal protein L32	RPL32	sp|P62910|RL32_HUMAN 60S ribosomal protein L32 OS=Homo sapiens OX=9606 GN=RPL32 PE=1 SV=2	1	5	5	5	3	0	1	1	2	3	1	3	0	1	1	2	3	1	3	0	1	1	2	3	1	33.3	33.3	33.3	15.86	135	135	0	25.702	By MS/MS		By MS/MS	By MS/MS	By MS/MS	By MS/MS	By matching	22.2	0
P62913	P62913	7	7	7	60S ribosomal protein L11	RPL11	sp|P62913|RL11_HUMAN 60S ribosomal protein L11 OS=Homo sapiens OX=9606 GN=RPL11 PE=1 SV=2	1	7	7	7	6	0	3	4	4	6	2	6	0	3	4	4	6	2	6	0	3	4	4	6	2	39.3	39.3	39.3	20.252	178	178	0	41.281	By MS/MS		By MS/MS	By MS/MS	By MS/MS	By MS/MS	By MS/MS	32.6	0
P62917	P62917	7	7	7	60S ribosomal protein L8	RPL8	sp|P62917|RL8_HUMAN 60S ribosomal protein L8 OS=Homo sapiens OX=9606 GN=RPL8 PE=1 SV=2	1	7	7	7	2	0	2	2	2	7	3	2	0	2	2	2	7	3	2	0	2	2	2	7	3	37	37	37	28.024	257	257	0	26.718	By MS/MS		By MS/MS	By MS/MS	By MS/MS	By MS/MS	By MS/MS	10.5	0
P62937;P0DN26;A0A0B4J2A2;A0A075B759;Q9Y536;F5H284;P0DN37	P62937	11;2;2;2;2;2;1	11;2;2;2;2;2;1	11;2;2;2;2;2;1	Peptidyl-prolyl cis-trans isomerase A;Peptidyl-prolyl cis-trans isomerase A, N-terminally processed	PPIA	sp|P62937|PPIA_HUMAN Peptidyl-prolyl cis-trans isomerase A OS=Homo sapiens OX=9606 GN=PPIA PE=1 SV=2	7	11	11	11	11	0	9	9	11	9	7	11	0	9	9	11	9	7	11	0	9	9	11	9	7	66.7	66.7	66.7	18.012	165	165;164;164;164;164;164;164	0	158.59	By MS/MS		By MS/MS	By MS/MS	By MS/MS	By MS/MS	By MS/MS	66.7	0
P62942	P62942	3	3	3	Peptidyl-prolyl cis-trans isomerase FKBP1A	FKBP1A	sp|P62942|FKB1A_HUMAN Peptidyl-prolyl cis-trans isomerase FKBP1A OS=Homo sapiens OX=9606 GN=FKBP1A PE=1 SV=2	1	3	3	3	2	0	1	1	1	2	1	2	0	1	1	1	2	1	2	0	1	1	1	2	1	54.6	54.6	54.6	11.951	108	108	0	30.266	By MS/MS		By matching	By matching	By MS/MS	By MS/MS	By MS/MS	41.7	0
P62979;P62987;P0CG47;P0CG48	P62979;P62987;P0CG47;P0CG48	13;11;11;11	13;11;11;11	13;11;11;11	Ubiquitin-40S ribosomal protein S27a;Ubiquitin;40S ribosomal protein S27a;Ubiquitin-60S ribosomal protein L40;Ubiquitin;60S ribosomal protein L40;Polyubiquitin-B;Ubiquitin;Polyubiquitin-C;Ubiquitin	RPS27A;UBA52;UBB;UBC	sp|P62979|RS27A_HUMAN Ubiquitin-40S ribosomal protein S27a OS=Homo sapiens OX=9606 GN=RPS27A PE=1 SV=2;sp|P62987|RL40_HUMAN Ubiquitin-60S ribosomal protein L40 OS=Homo sapiens OX=9606 GN=UBA52 PE=1 SV=2;sp|P0CG47|UBB_HUMAN Polyubiquitin-B OS=Homo sapiens O	4	13	13	13	11	0	5	5	10	5	3	11	0	5	5	10	5	3	11	0	5	5	10	5	3	58.3	58.3	58.3	17.965	156	156;128;229;685	0	139.13	By MS/MS		By MS/MS	By MS/MS	By MS/MS	By MS/MS	By MS/MS	46.2	0
P62993	P62993	7	7	7	Growth factor receptor-bound protein 2	GRB2	sp|P62993|GRB2_HUMAN Growth factor receptor-bound protein 2 OS=Homo sapiens OX=9606 GN=GRB2 PE=1 SV=1	1	7	7	7	1	0	0	0	1	7	1	1	0	0	0	1	7	1	1	0	0	0	1	7	1	30	30	30	25.206	217	217	0	15.329	By MS/MS				By matching	By MS/MS	By matching	3.7	0
P62995	P62995	4	4	3	Transformer-2 protein homolog beta	TRA2B	sp|P62995|TRA2B_HUMAN Transformer-2 protein homolog beta OS=Homo sapiens OX=9606 GN=TRA2B PE=1 SV=1	1	4	4	3	1	0	1	0	0	4	0	1	0	1	0	0	4	0	0	0	1	0	0	3	0	14.6	14.6	11.5	33.665	288	288	0	8.74	By matching		By matching			By MS/MS		3.1	0
P63000;P60763;P15153	P63000;P60763;P15153	7;5;4	7;5;4	6;4;3	Ras-related C3 botulinum toxin substrate 1;Ras-related C3 botulinum toxin substrate 3;Ras-related C3 botulinum toxin substrate 2	RAC1;RAC3;RAC2	sp|P63000|RAC1_HUMAN Ras-related C3 botulinum toxin substrate 1 OS=Homo sapiens OX=9606 GN=RAC1 PE=1 SV=1;sp|P60763|RAC3_HUMAN Ras-related C3 botulinum toxin substrate 3 OS=Homo sapiens OX=9606 GN=RAC3 PE=1 SV=1;sp|P15153|RAC2_HUMAN Ras-related C3 botulinu	3	7	7	6	6	0	3	2	3	6	4	6	0	3	2	3	6	4	5	0	3	2	3	5	3	38	38	32.3	21.45	192	192;192;192	0	19.066	By MS/MS		By matching	By matching	By MS/MS	By MS/MS	By MS/MS	30.7	0
P63010	P63010	8	8	3	AP-2 complex subunit beta	AP2B1	sp|P63010|AP2B1_HUMAN AP-2 complex subunit beta OS=Homo sapiens OX=9606 GN=AP2B1 PE=1 SV=1	1	8	8	3	5	0	1	1	3	7	1	5	0	1	1	3	7	1	2	0	1	1	2	3	1	9.2	9.2	3.6	104.55	937	937	0	13.196	By MS/MS		By matching	By matching	By MS/MS	By MS/MS	By matching	5.5	0
P63092;Q5JWF2	P63092;Q5JWF2	3;3	2;2	2;2	Guanine nucleotide-binding protein G(s) subunit alpha isoforms short;Guanine nucleotide-binding protein G(s) subunit alpha isoforms XLas	GNAS	sp|P63092|GNAS2_HUMAN Guanine nucleotide-binding protein G(s) subunit alpha isoforms short OS=Homo sapiens OX=9606 GN=GNAS PE=1 SV=1;sp|Q5JWF2|GNAS1_HUMAN Guanine nucleotide-binding protein G(s) subunit alpha isoforms XLas OS=Homo sapiens OX=9606 GN=GNAS P	2	3	2	2	2	0	1	1	1	3	0	1	0	0	0	0	2	0	1	0	0	0	0	2	0	7.6	4.8	4.8	45.664	394	394;1037	0.00067568	2.8685	By MS/MS		By matching	By matching	By matching	By MS/MS		5.3	0
P63104;REV__P53355	P63104	18;1	15;1	13;1	14-3-3 protein zeta/delta	YWHAZ	sp|P63104|1433Z_HUMAN 14-3-3 protein zeta/delta OS=Homo sapiens OX=9606 GN=YWHAZ PE=1 SV=1	2	18	15	13	15	1	14	10	12	17	12	13	0	12	8	10	14	10	11	0	11	7	9	13	9	67.3	61.2	49.4	27.745	245	245;1430	0	218.12	By MS/MS	By matching	By MS/MS	By MS/MS	By MS/MS	By MS/MS	By MS/MS	60.8	4.1
P63151;Q9Y2T4	P63151	5;1	5;1	5;1	Serine/threonine-protein phosphatase 2A 55 kDa regulatory subunit B alpha isoform	PPP2R2A	sp|P63151|2ABA_HUMAN Serine/threonine-protein phosphatase 2A 55 kDa regulatory subunit B alpha isoform OS=Homo sapiens OX=9606 GN=PPP2R2A PE=1 SV=1	2	5	5	5	2	0	0	1	2	5	0	2	0	0	1	2	5	0	2	0	0	1	2	5	0	12.1	12.1	12.1	51.691	447	447;447	0	24.429	By MS/MS			By matching	By matching	By MS/MS		4.5	0
P63165;G2XKQ0	P63165;G2XKQ0	3;2	3;2	3;2	Small ubiquitin-related modifier 1;Small ubiquitin-related modifier	SUMO1	sp|P63165|SUMO1_HUMAN Small ubiquitin-related modifier 1 OS=Homo sapiens OX=9606 GN=SUMO1 PE=1 SV=1;sp|G2XKQ0|SUMO5_HUMAN Small ubiquitin-related modifier 5 OS=Homo sapiens OX=9606 GN=SUMO1P1 PE=1 SV=2	2	3	3	3	1	0	1	1	1	3	0	1	0	1	1	1	3	0	1	0	1	1	1	3	0	33.7	33.7	33.7	11.557	101	101;101	0	13.63	By MS/MS		By matching	By matching	By MS/MS	By MS/MS		11.9	0
Q96FJ2;P63167	Q96FJ2;P63167	2;2	2;2	2;2	Dynein light chain 2, cytoplasmic;Dynein light chain 1, cytoplasmic	DYNLL2;DYNLL1	sp|Q96FJ2|DYL2_HUMAN Dynein light chain 2, cytoplasmic OS=Homo sapiens OX=9606 GN=DYNLL2 PE=1 SV=1;sp|P63167|DYL1_HUMAN Dynein light chain 1, cytoplasmic OS=Homo sapiens OX=9606 GN=DYNLL1 PE=1 SV=1	2	2	2	2	1	0	1	1	1	2	1	1	0	1	1	1	2	1	1	0	1	1	1	2	1	13.5	13.5	13.5	10.35	89	89;89	0	8.5345	By MS/MS		By matching	By matching	By matching	By MS/MS	By MS/MS	13.5	0
P63173	P63173	4	4	4	60S ribosomal protein L38	RPL38	sp|P63173|RL38_HUMAN 60S ribosomal protein L38 OS=Homo sapiens OX=9606 GN=RPL38 PE=1 SV=2	1	4	4	4	3	0	2	2	2	3	1	3	0	2	2	2	3	1	3	0	2	2	2	3	1	41.4	41.4	41.4	8.2178	70	70	0	5.7139	By MS/MS		By matching	By matching	By MS/MS	By MS/MS	By MS/MS	27.1	0
P63208	P63208	6	6	6	S-phase kinase-associated protein 1	SKP1	sp|P63208|SKP1_HUMAN S-phase kinase-associated protein 1 OS=Homo sapiens OX=9606 GN=SKP1 PE=1 SV=2	1	6	6	6	2	0	1	0	1	5	0	2	0	1	0	1	5	0	2	0	1	0	1	5	0	36.2	36.2	36.2	18.658	163	163	0	34.43	By MS/MS		By matching		By matching	By MS/MS		17.8	0
P63220	P63220	4	4	4	40S ribosomal protein S21	RPS21	sp|P63220|RS21_HUMAN 40S ribosomal protein S21 OS=Homo sapiens OX=9606 GN=RPS21 PE=1 SV=1	1	4	4	4	3	0	0	1	2	4	1	3	0	0	1	2	4	1	3	0	0	1	2	4	1	41	41	41	9.1113	83	83	0	13.243	By MS/MS			By matching	By MS/MS	By MS/MS	By matching	39.8	0
P63241;Q6IS14;Q9GZV4	P63241;Q6IS14	12;7;5	12;7;5	12;7;5	Eukaryotic translation initiation factor 5A-1;Eukaryotic translation initiation factor 5A-1-like	EIF5A;EIF5AL1	sp|P63241|IF5A1_HUMAN Eukaryotic translation initiation factor 5A-1 OS=Homo sapiens OX=9606 GN=EIF5A PE=1 SV=2;sp|Q6IS14|IF5AL_HUMAN Eukaryotic translation initiation factor 5A-1-like OS=Homo sapiens OX=9606 GN=EIF5AL1 PE=2 SV=2	3	12	12	12	9	0	5	4	7	10	7	9	0	5	4	7	10	7	9	0	5	4	7	10	7	66.9	66.9	66.9	16.832	154	154;154;153	0	196.72	By MS/MS		By matching	By MS/MS	By MS/MS	By MS/MS	By MS/MS	58.4	0
P63244	P63244	16	16	16	Guanine nucleotide-binding protein subunit beta-2-like 1;Guanine nucleotide-binding protein subunit beta-2-like 1, N-terminally processed	GNB2L1	sp|P63244|RACK1_HUMAN Receptor of activated protein C kinase 1 OS=Homo sapiens OX=9606 GN=RACK1 PE=1 SV=3	1	16	16	16	12	0	7	6	9	15	12	12	0	7	6	9	15	12	12	0	7	6	9	15	12	58	58	58	35.076	317	317	0	134.52	By MS/MS		By MS/MS	By MS/MS	By MS/MS	By MS/MS	By MS/MS	48.3	0
P63261	P63261	34	34	1	Actin, cytoplasmic 2;Actin, cytoplasmic 2, N-terminally processed	ACTG1	sp|P63261|ACTG_HUMAN Actin, cytoplasmic 2 OS=Homo sapiens OX=9606 GN=ACTG1 PE=1 SV=1	1	34	34	1	32	3	27	26	28	27	25	32	3	27	26	28	27	25	1	0	1	1	1	1	1	86.7	86.7	4.5	41.792	375	375	0	323.31	By MS/MS	By matching	By MS/MS	By MS/MS	By MS/MS	By MS/MS	By MS/MS	86.7	8.3
P63279	P63279	2	2	2	SUMO-conjugating enzyme UBC9	UBE2I	sp|P63279|UBC9_HUMAN SUMO-conjugating enzyme UBC9 OS=Homo sapiens OX=9606 GN=UBE2I PE=1 SV=1	1	2	2	2	2	0	1	0	1	2	0	2	0	1	0	1	2	0	2	0	1	0	1	2	0	14.6	14.6	14.6	18.007	158	158	0	5.7871	By MS/MS		By matching		By MS/MS	By MS/MS		14.6	0
P63313	P63313	2	1	1	Thymosin beta-10	TMSB10	sp|P63313|TYB10_HUMAN Thymosin beta-10 OS=Homo sapiens OX=9606 GN=TMSB10 PE=1 SV=2	1	2	1	1	1	0	1	1	1	2	2	1	0	1	1	1	1	1	1	0	1	1	1	1	1	47.7	31.8	31.8	5.0256	44	44	0	8.677	By MS/MS		By MS/MS	By matching	By MS/MS	By MS/MS	By MS/MS	31.8	0
P67775;P62714;P60510	P67775;P62714	8;7;1	8;7;1	8;7;1	Serine/threonine-protein phosphatase 2A catalytic subunit alpha isoform;Serine/threonine-protein phosphatase 2A catalytic subunit beta isoform	PPP2CA;PPP2CB	sp|P67775|PP2AA_HUMAN Serine/threonine-protein phosphatase 2A catalytic subunit alpha isoform OS=Homo sapiens OX=9606 GN=PPP2CA PE=1 SV=1;sp|P62714|PP2AB_HUMAN Serine/threonine-protein phosphatase 2A catalytic subunit beta isoform OS=Homo sapiens OX=9606 G	3	8	8	8	4	1	1	1	2	8	0	4	1	1	1	2	8	0	4	1	1	1	2	8	0	33.7	33.7	33.7	35.594	309	309;309;307	0	38.876	By MS/MS	By matching	By matching	By matching	By matching	By MS/MS		15.5	2.6
P67809;Q9Y2T7	P67809	13;3	13;3	9;0	Nuclease-sensitive element-binding protein 1	YBX1	sp|P67809|YBOX1_HUMAN Nuclease-sensitive element-binding protein 1 OS=Homo sapiens OX=9606 GN=YBX1 PE=1 SV=3	2	13	13	9	7	0	5	5	4	13	4	7	0	5	5	4	13	4	4	0	2	2	1	9	1	52.5	52.5	41	35.924	324	324;364	0	310.85	By MS/MS		By MS/MS	By MS/MS	By MS/MS	By MS/MS	By MS/MS	30.2	0
P67812	P67812	1	1	1	Signal peptidase complex catalytic subunit SEC11A	SEC11A	sp|P67812|SC11A_HUMAN Signal peptidase complex catalytic subunit SEC11A OS=Homo sapiens OX=9606 GN=SEC11A PE=1 SV=1	1	1	1	1	0	0	0	0	0	1	0	0	0	0	0	0	1	0	0	0	0	0	0	1	0	4.5	4.5	4.5	20.625	179	179	0.001243	2.0283						By MS/MS		0	0
P67870	P67870	1	1	1	Casein kinase II subunit beta	CSNK2B	sp|P67870|CSK2B_HUMAN Casein kinase II subunit beta OS=Homo sapiens OX=9606 GN=CSNK2B PE=1 SV=1	1	1	1	1	0	0	0	0	0	1	0	0	0	0	0	0	1	0	0	0	0	0	0	1	0	5.1	5.1	5.1	24.942	215	215	0	3.6039						By MS/MS		0	0
P67936;Q2TAC2	P67936	17;1	10;1	8;1	Tropomyosin alpha-4 chain	TPM4	sp|P67936|TPM4_HUMAN Tropomyosin alpha-4 chain OS=Homo sapiens OX=9606 GN=TPM4 PE=1 SV=3	2	17	10	8	12	0	11	9	9	17	8	8	0	7	5	5	10	4	7	0	6	4	4	8	3	50.8	40.3	33.9	28.521	248	248;916	0	111.12	By MS/MS		By MS/MS	By MS/MS	By MS/MS	By MS/MS	By MS/MS	42.3	0
P68133;P68032	P68133;P68032	21;21	4;4	0;0	Actin, alpha skeletal muscle;Actin, alpha cardiac muscle 1	ACTA1;ACTC1	sp|P68133|ACTS_HUMAN Actin, alpha skeletal muscle OS=Homo sapiens OX=9606 GN=ACTA1 PE=1 SV=1;sp|P68032|ACTC_HUMAN Actin, alpha cardiac muscle 1 OS=Homo sapiens OX=9606 GN=ACTC1 PE=1 SV=1	2	21	4	0	18	3	15	14	17	18	15	2	0	1	1	2	4	2	0	0	0	0	0	0	0	48.5	15.1	0	42.051	377	377;377	0	45.946	By MS/MS	By matching	By MS/MS	By MS/MS	By MS/MS	By MS/MS	By MS/MS	42.4	8.2
P68036;A0A1B0GUS4	P68036;A0A1B0GUS4	6;4	6;4	6;4	Ubiquitin-conjugating enzyme E2 L3	UBE2L3	sp|P68036|UB2L3_HUMAN Ubiquitin-conjugating enzyme E2 L3 OS=Homo sapiens OX=9606 GN=UBE2L3 PE=1 SV=1;sp|A0A1B0GUS4|UB2L5_HUMAN Ubiquitin-conjugating enzyme E2 L5 OS=Homo sapiens OX=9606 GN=UBE2L5 PE=2 SV=1	2	6	6	6	3	0	2	1	3	4	1	3	0	2	1	3	4	1	3	0	2	1	3	4	1	51.9	51.9	51.9	17.861	154	154;154	0	42.247	By MS/MS		By matching	By matching	By matching	By MS/MS	By matching	29.9	0
P68104;Q5VTE0	P68104;Q5VTE0	20;19	20;19	11;10	Elongation factor 1-alpha 1;Putative elongation factor 1-alpha-like 3	EEF1A1;EEF1A1P5	sp|P68104|EF1A1_HUMAN Elongation factor 1-alpha 1 OS=Homo sapiens OX=9606 GN=EEF1A1 PE=1 SV=1;sp|Q5VTE0|EF1A3_HUMAN Putative elongation factor 1-alpha-like 3 OS=Homo sapiens OX=9606 GN=EEF1A1P5 PE=5 SV=1	2	20	20	11	17	4	15	14	14	15	13	17	4	15	14	14	15	13	10	1	7	7	7	8	7	51.3	51.3	29.2	50.14	462	462;462	0	323.31	By MS/MS	By MS/MS	By MS/MS	By MS/MS	By MS/MS	By MS/MS	By MS/MS	47.2	7.8
P68363;A6NHL2;Q9H853	P68363	26;3;1	26;3;1	0;0;0	Tubulin alpha-1B chain	TUBA1B	sp|P68363|TBA1B_HUMAN Tubulin alpha-1B chain OS=Homo sapiens OX=9606 GN=TUBA1B PE=1 SV=1	3	26	26	0	24	0	16	15	18	23	22	24	0	16	15	18	23	22	0	0	0	0	0	0	0	64.1	64.1	0	50.151	451	451;446;241	0	323.31	By MS/MS		By MS/MS	By MS/MS	By MS/MS	By MS/MS	By MS/MS	62.1	0
P68366	P68366	23	4	4	Tubulin alpha-4A chain	TUBA4A	sp|P68366|TBA4A_HUMAN Tubulin alpha-4A chain OS=Homo sapiens OX=9606 GN=TUBA4A PE=1 SV=1	1	23	4	4	21	0	16	15	18	23	21	4	0	4	3	4	4	3	4	0	4	3	4	4	3	57.1	12.1	12.1	49.924	448	448	0	49.123	By MS/MS		By MS/MS	By MS/MS	By MS/MS	By MS/MS	By MS/MS	55.1	0
P68371;Q3ZCM7	P68371	25;8	25;8	1;0	Tubulin beta-4B chain	TUBB4B	sp|P68371|TBB4B_HUMAN Tubulin beta-4B chain OS=Homo sapiens OX=9606 GN=TUBB4B PE=1 SV=1	2	25	25	1	24	0	18	14	22	22	19	24	0	18	14	22	22	19	1	0	1	1	1	1	1	75.3	75.3	2.7	49.83	445	445;444	0	323.31	By MS/MS		By MS/MS	By MS/MS	By MS/MS	By MS/MS	By MS/MS	75.1	0
Q8NEV1;P68400	Q8NEV1;P68400	2;2	2;2	1;1	Casein kinase II subunit alpha 3;Casein kinase II subunit alpha	CSNK2A3;CSNK2A1	sp|Q8NEV1|CSK23_HUMAN Casein kinase II subunit alpha 3 OS=Homo sapiens OX=9606 GN=CSNK2A3 PE=1 SV=2;sp|P68400|CSK21_HUMAN Casein kinase II subunit alpha OS=Homo sapiens OX=9606 GN=CSNK2A1 PE=1 SV=1	2	2	2	1	0	0	0	0	0	2	0	0	0	0	0	0	2	0	0	0	0	0	0	1	0	3.3	3.3	1.8	45.219	391	391;391	0.0070217	1.5285						By MS/MS		0	0
P68402	P68402	2	2	2	Platelet-activating factor acetylhydrolase IB subunit beta	PAFAH1B2	sp|P68402|PA1B2_HUMAN Platelet-activating factor acetylhydrolase IB subunit beta OS=Homo sapiens OX=9606 GN=PAFAH1B2 PE=1 SV=1	1	2	2	2	2	0	0	0	2	2	0	2	0	0	0	2	2	0	2	0	0	0	2	2	0	8.3	8.3	8.3	25.569	229	229	0	9.5585	By MS/MS				By matching	By MS/MS		8.3	0
P68431;Q71DI3;Q16695;Q6NXT2;P0DPK2;P0DPK5	P68431;Q71DI3;Q16695;Q6NXT2	7;6;6;4;1;1	7;6;6;4;1;1	1;0;0;0;0;0	Histone H3.1;Histone H3.2;Histone H3.1t;Histone H3.3C	HIST1H3A;HIST2H3A;HIST3H3;H3F3C	sp|P68431|H31_HUMAN Histone H3.1 OS=Homo sapiens OX=9606 GN=HIST1H3A PE=1 SV=2;sp|Q71DI3|H32_HUMAN Histone H3.2 OS=Homo sapiens OX=9606 GN=HIST2H3A PE=1 SV=3;sp|Q16695|H31T_HUMAN Histone H3.1t OS=Homo sapiens OX=9606 GN=HIST3H3 PE=1 SV=3;sp|Q6NXT2|H3C_HUMA	6	7	7	1	7	0	5	4	4	5	5	7	0	5	4	4	5	5	1	0	0	0	0	0	0	52.9	52.9	23.5	15.404	136	136;136;136;135;136;147	0	25.579	By MS/MS		By MS/MS	By matching	By MS/MS	By MS/MS	By MS/MS	52.9	0
P78330	P78330	3	3	3	Phosphoserine phosphatase	PSPH	sp|P78330|SERB_HUMAN Phosphoserine phosphatase OS=Homo sapiens OX=9606 GN=PSPH PE=1 SV=2	1	3	3	3	2	0	0	0	1	2	0	2	0	0	0	1	2	0	2	0	0	0	1	2	0	15.6	15.6	15.6	25.007	225	225	0	5.0447	By MS/MS				By matching	By MS/MS		11.6	0
P78344	P78344	8	8	8	Eukaryotic translation initiation factor 4 gamma 2	EIF4G2	sp|P78344|IF4G2_HUMAN Eukaryotic translation initiation factor 4 gamma 2 OS=Homo sapiens OX=9606 GN=EIF4G2 PE=1 SV=1	1	8	8	8	3	0	0	0	1	7	1	3	0	0	0	1	7	1	3	0	0	0	1	7	1	9.8	9.8	9.8	102.36	907	907	0	12.803	By MS/MS				By matching	By MS/MS	By matching	3.6	0
P78347;Q86UP8;Q6EKJ0	P78347	11;1;1	11;1;1	11;1;1	General transcription factor II-I	GTF2I	sp|P78347|GTF2I_HUMAN General transcription factor II-I OS=Homo sapiens OX=9606 GN=GTF2I PE=1 SV=2	3	11	11	11	3	0	2	2	2	10	0	3	0	2	2	2	10	0	3	0	2	2	2	10	0	11.9	11.9	11.9	112.42	998	998;949;949	0	23.039	By MS/MS		By matching	By matching	By matching	By MS/MS		4	0
P78371	P78371	30	30	30	T-complex protein 1 subunit beta	CCT2	sp|P78371|TCPB_HUMAN T-complex protein 1 subunit beta OS=Homo sapiens OX=9606 GN=CCT2 PE=1 SV=4	1	30	30	30	23	0	7	7	15	24	7	23	0	7	7	15	24	7	23	0	7	7	15	24	7	61.3	61.3	61.3	57.488	535	535	0	282.03	By MS/MS		By matching	By matching	By MS/MS	By MS/MS	By MS/MS	52.1	0
P78406	P78406	2	2	2	mRNA export factor	RAE1	sp|P78406|RAE1L_HUMAN mRNA export factor OS=Homo sapiens OX=9606 GN=RAE1 PE=1 SV=1	1	2	2	2	0	0	0	0	0	2	0	0	0	0	0	0	2	0	0	0	0	0	0	2	0	6	6	6	40.968	368	368	0.0006566	2.5735						By MS/MS		0	0
P78417	P78417	8	8	8	Glutathione S-transferase omega-1	GSTO1	sp|P78417|GSTO1_HUMAN Glutathione S-transferase omega-1 OS=Homo sapiens OX=9606 GN=GSTO1 PE=1 SV=2	1	8	8	8	4	0	1	1	4	7	0	4	0	1	1	4	7	0	4	0	1	1	4	7	0	35.7	35.7	35.7	27.566	241	241	0	32.902	By MS/MS		By matching	By matching	By MS/MS	By MS/MS		17.4	0
P78527	P78527	53	53	53	DNA-dependent protein kinase catalytic subunit	PRKDC	sp|P78527|PRKDC_HUMAN DNA-dependent protein kinase catalytic subunit OS=Homo sapiens OX=9606 GN=PRKDC PE=1 SV=3	1	53	53	53	30	0	13	12	18	45	4	30	0	13	12	18	45	4	30	0	13	12	18	45	4	13.5	13.5	13.5	469.08	4128	4128	0	156.18	By MS/MS		By matching	By matching	By MS/MS	By MS/MS	By matching	8.5	0
P80723	P80723	15	15	15	Brain acid soluble protein 1	BASP1	sp|P80723|BASP1_HUMAN Brain acid soluble protein 1 OS=Homo sapiens OX=9606 GN=BASP1 PE=1 SV=2	1	15	15	15	13	0	13	13	11	15	10	13	0	13	13	11	15	10	13	0	13	13	11	15	10	78.4	78.4	78.4	22.693	227	227	0	244.45	By MS/MS		By MS/MS	By MS/MS	By MS/MS	By MS/MS	By MS/MS	73.1	0
P81605	P81605	10	10	10	Dermcidin;Survival-promoting peptide;DCD-1	DCD	sp|P81605|DCD_HUMAN Dermcidin OS=Homo sapiens OX=9606 GN=DCD PE=1 SV=2	1	10	10	10	9	4	10	10	8	1	3	9	4	10	10	8	1	3	9	4	10	10	8	1	3	59.1	59.1	59.1	11.284	110	110	0	56.385	By MS/MS	By MS/MS	By MS/MS	By MS/MS	By MS/MS	By MS/MS	By MS/MS	59.1	32.7
P82909	P82909	2	2	2	28S ribosomal protein S36, mitochondrial	MRPS36	sp|P82909|RT36_HUMAN 28S ribosomal protein S36, mitochondrial OS=Homo sapiens OX=9606 GN=MRPS36 PE=1 SV=2	1	2	2	2	2	0	0	0	2	1	0	2	0	0	0	2	1	0	2	0	0	0	2	1	0	28.2	28.2	28.2	11.466	103	103	0	7.1742	By MS/MS				By matching	By MS/MS		28.2	0
P82979	P82979	5	5	5	SAP domain-containing ribonucleoprotein	SARNP	sp|P82979|SARNP_HUMAN SAP domain-containing ribonucleoprotein OS=Homo sapiens OX=9606 GN=SARNP PE=1 SV=3	1	5	5	5	5	0	3	4	5	4	0	5	0	3	4	5	4	0	5	0	3	4	5	4	0	22.9	22.9	22.9	23.671	210	210	0	17.008	By MS/MS		By MS/MS	By MS/MS	By MS/MS	By MS/MS		22.9	0
P83731	P83731	5	5	5	60S ribosomal protein L24	RPL24	sp|P83731|RL24_HUMAN 60S ribosomal protein L24 OS=Homo sapiens OX=9606 GN=RPL24 PE=1 SV=1	1	5	5	5	4	0	4	4	4	4	2	4	0	4	4	4	4	2	4	0	4	4	4	4	2	30.6	30.6	30.6	17.779	157	157	0	12.787	By MS/MS		By MS/MS	By matching	By MS/MS	By MS/MS	By MS/MS	24.8	0
Q969Q0;P83881	Q969Q0;P83881	3;3	3;3	3;3	60S ribosomal protein L36a-like;60S ribosomal protein L36a	RPL36AL;RPL36A	sp|Q969Q0|RL36L_HUMAN 60S ribosomal protein L36a-like OS=Homo sapiens OX=9606 GN=RPL36AL PE=1 SV=3;sp|P83881|RL36A_HUMAN 60S ribosomal protein L36a OS=Homo sapiens OX=9606 GN=RPL36A PE=1 SV=2	2	3	3	3	2	0	1	2	2	3	1	2	0	1	2	2	3	1	2	0	1	2	2	3	1	28.3	28.3	28.3	12.469	106	106;106	0	10.261	By MS/MS		By MS/MS	By MS/MS	By matching	By MS/MS	By MS/MS	16	0
P84085	P84085	6	1	1	ADP-ribosylation factor 5	ARF5	sp|P84085|ARF5_HUMAN ADP-ribosylation factor 5 OS=Homo sapiens OX=9606 GN=ARF5 PE=1 SV=2	1	6	1	1	6	0	0	1	6	5	4	1	0	0	0	1	1	1	1	0	0	0	1	1	1	40	5.6	5.6	20.529	180	180	0	3.3143	By MS/MS			By matching	By matching	By MS/MS	By matching	40	0
P84090	P84090	5	5	5	Enhancer of rudimentary homolog	ERH	sp|P84090|ERH_HUMAN Enhancer of rudimentary homolog OS=Homo sapiens OX=9606 GN=ERH PE=1 SV=1	1	5	5	5	2	0	2	2	2	5	2	2	0	2	2	2	5	2	2	0	2	2	2	5	2	50	50	50	12.259	104	104	0	45.56	By MS/MS		By MS/MS	By MS/MS	By MS/MS	By MS/MS	By MS/MS	21.2	0
P84095	P84095	2	1	1	Rho-related GTP-binding protein RhoG	RHOG	sp|P84095|RHOG_HUMAN Rho-related GTP-binding protein RhoG OS=Homo sapiens OX=9606 GN=RHOG PE=1 SV=1	1	2	1	1	2	0	0	0	1	2	1	1	0	0	0	1	1	0	1	0	0	0	1	1	0	10.5	4.7	4.7	21.308	191	191	0.0012658	2.2047	By MS/MS				By matching	By MS/MS	By matching	10.5	0
P84098	P84098	4	4	4	60S ribosomal protein L19	RPL19	sp|P84098|RL19_HUMAN 60S ribosomal protein L19 OS=Homo sapiens OX=9606 GN=RPL19 PE=1 SV=1	1	4	4	4	2	0	1	2	2	4	1	2	0	1	2	2	4	1	2	0	1	2	2	4	1	17.9	17.9	17.9	23.466	196	196	0	35.523	By MS/MS		By MS/MS	By matching	By MS/MS	By MS/MS	By MS/MS	13.3	0
P84101	P84101	1	1	1	Small EDRK-rich factor 2	SERF2	sp|P84101|SERF2_HUMAN Small EDRK-rich factor 2 OS=Homo sapiens OX=9606 GN=SERF2 PE=1 SV=1	1	1	1	1	1	0	0	0	0	1	0	1	0	0	0	0	1	0	1	0	0	0	0	1	0	18.6	18.6	18.6	6.8998	59	59	0	3.6918	By matching					By MS/MS		18.6	0
P84103	P84103	6	6	5	Serine/arginine-rich splicing factor 3	SRSF3	sp|P84103|SRSF3_HUMAN Serine/arginine-rich splicing factor 3 OS=Homo sapiens OX=9606 GN=SRSF3 PE=1 SV=1	1	6	6	5	5	0	4	4	4	6	3	5	0	4	4	4	6	3	4	0	3	3	3	5	3	32.3	32.3	23.8	19.329	164	164	0	65.595	By MS/MS		By MS/MS	By MS/MS	By MS/MS	By MS/MS	By MS/MS	32.3	0
P84243	P84243	7	1	1	Histone H3.3	H3F3A	sp|P84243|H33_HUMAN Histone H3.3 OS=Homo sapiens OX=9606 GN=H3F3A PE=1 SV=2	1	7	1	1	7	0	5	4	4	5	5	1	0	0	0	0	0	0	1	0	0	0	0	0	0	52.9	23.5	23.5	15.328	136	136	0	6.1038	By MS/MS		By matching	By matching	By matching	By matching	By matching	52.9	0
P98179	P98179	4	4	4	RNA-binding protein 3	RBM3	sp|P98179|RBM3_HUMAN RNA-binding protein 3 OS=Homo sapiens OX=9606 GN=RBM3 PE=1 SV=1	1	4	4	4	3	0	1	1	2	3	2	3	0	1	1	2	3	2	3	0	1	1	2	3	2	40.8	40.8	40.8	17.17	157	157	0	80.139	By MS/MS		By matching	By matching	By MS/MS	By MS/MS	By matching	36.3	0
P99999;CON__P62894	P99999;CON__P62894	3;2	3;2	3;2	Cytochrome c	CYCS	sp|P99999|CYC_HUMAN Cytochrome c OS=Homo sapiens OX=9606 GN=CYCS PE=1 SV=2;	2	3	3	3	2	0	1	1	2	2	2	2	0	1	1	2	2	2	2	0	1	1	2	2	2	24.8	24.8	24.8	11.749	105	105;105	0	6.6641	By MS/MS		By matching	By matching	By MS/MS	By MS/MS	By MS/MS	24.8	0
Q00059	Q00059	2	2	2	Transcription factor A, mitochondrial	TFAM	sp|Q00059|TFAM_HUMAN Transcription factor A, mitochondrial OS=Homo sapiens OX=9606 GN=TFAM PE=1 SV=1	1	2	2	2	0	0	0	0	0	2	0	0	0	0	0	0	2	0	0	0	0	0	0	2	0	6.9	6.9	6.9	29.096	246	246	0.0053603	1.6627						By MS/MS		0	0
Q00325	Q00325	4	4	4	Phosphate carrier protein, mitochondrial	SLC25A3	sp|Q00325|MPCP_HUMAN Phosphate carrier protein, mitochondrial OS=Homo sapiens OX=9606 GN=SLC25A3 PE=1 SV=2	1	4	4	4	2	0	2	1	3	3	2	2	0	2	1	3	3	2	2	0	2	1	3	3	2	9.9	9.9	9.9	40.094	362	362	0	15.566	By MS/MS		By MS/MS	By matching	By MS/MS	By MS/MS	By MS/MS	6.4	0
Q00341	Q00341	13	13	13	Vigilin	HDLBP	sp|Q00341|VIGLN_HUMAN Vigilin OS=Homo sapiens OX=9606 GN=HDLBP PE=1 SV=2	1	13	13	13	7	0	0	2	5	7	1	7	0	0	2	5	7	1	7	0	0	2	5	7	1	12.5	12.5	12.5	141.45	1268	1268	0	36.674	By MS/MS			By matching	By MS/MS	By MS/MS	By matching	7.6	0
Q00610	Q00610	54	54	42	Clathrin heavy chain 1	CLTC	sp|Q00610|CLH1_HUMAN Clathrin heavy chain 1 OS=Homo sapiens OX=9606 GN=CLTC PE=1 SV=5	1	54	54	42	38	0	19	15	32	41	23	38	0	19	15	32	41	23	30	0	17	15	25	31	16	35.6	35.6	29.2	191.61	1675	1675	0	323.31	By MS/MS		By MS/MS	By MS/MS	By MS/MS	By MS/MS	By MS/MS	28.1	0
Q00688	Q00688	4	4	4	Peptidyl-prolyl cis-trans isomerase FKBP3	FKBP3	sp|Q00688|FKBP3_HUMAN Peptidyl-prolyl cis-trans isomerase FKBP3 OS=Homo sapiens OX=9606 GN=FKBP3 PE=1 SV=1	1	4	4	4	3	0	0	0	0	4	2	3	0	0	0	0	4	2	3	0	0	0	0	4	2	21.4	21.4	21.4	25.177	224	224	0	21.231	By MS/MS					By MS/MS	By matching	17.9	0
Q00765	Q00765	3	3	3	Receptor expression-enhancing protein 5	REEP5	sp|Q00765|REEP5_HUMAN Receptor expression-enhancing protein 5 OS=Homo sapiens OX=9606 GN=REEP5 PE=1 SV=3	1	3	3	3	2	0	1	2	2	2	1	2	0	1	2	2	2	1	2	0	1	2	2	2	1	11.1	11.1	11.1	21.493	189	189	0	9.2148	By MS/MS		By matching	By matching	By MS/MS	By MS/MS	By matching	5.8	0
Q00796	Q00796	6	6	6	Sorbitol dehydrogenase	SORD	sp|Q00796|DHSO_HUMAN Sorbitol dehydrogenase OS=Homo sapiens OX=9606 GN=SORD PE=1 SV=4	1	6	6	6	2	0	1	1	0	5	1	2	0	1	1	0	5	1	2	0	1	1	0	5	1	17.9	17.9	17.9	38.324	357	357	0	29	By MS/MS		By matching	By matching		By MS/MS	By matching	7.6	0
Q00839	Q00839	22	22	22	Heterogeneous nuclear ribonucleoprotein U	HNRNPU	sp|Q00839|HNRPU_HUMAN Heterogeneous nuclear ribonucleoprotein U OS=Homo sapiens OX=9606 GN=HNRNPU PE=1 SV=6	1	22	22	22	15	0	13	14	15	20	9	15	0	13	14	15	20	9	15	0	13	14	15	20	9	26.3	26.3	26.3	90.583	825	825	0	115.32	By MS/MS		By MS/MS	By MS/MS	By MS/MS	By MS/MS	By MS/MS	19.8	0
Q01082;O15020;P11277	Q01082	51;5;2	51;5;2	51;5;2	Spectrin beta chain, non-erythrocytic 1	SPTBN1	sp|Q01082|SPTB2_HUMAN Spectrin beta chain, non-erythrocytic 1 OS=Homo sapiens OX=9606 GN=SPTBN1 PE=1 SV=2	3	51	51	51	32	0	12	8	26	41	6	32	0	12	8	26	41	6	32	0	12	8	26	41	6	26.3	26.3	26.3	274.61	2364	2364;2390;2137	0	247.72	By MS/MS		By MS/MS	By matching	By MS/MS	By MS/MS	By MS/MS	17.1	0
Q01085;P31483	Q01085;P31483	2;1	2;1	2;1	Nucleolysin TIAR;Nucleolysin TIA-1 isoform p40	TIAL1;TIA1	sp|Q01085|TIAR_HUMAN Nucleolysin TIAR OS=Homo sapiens OX=9606 GN=TIAL1 PE=1 SV=1;sp|P31483|TIA1_HUMAN Nucleolysin TIA-1 isoform p40 OS=Homo sapiens OX=9606 GN=TIA1 PE=1 SV=3	2	2	2	2	1	0	0	1	1	2	1	1	0	0	1	1	2	1	1	0	0	1	1	2	1	5.3	5.3	5.3	41.59	375	375;386	0	6.4464	By MS/MS			By matching	By matching	By MS/MS	By matching	2.9	0
Q01105;P0DME0	Q01105;P0DME0	10;6	10;6	10;6	Protein SET;Protein SETSIP	SET;SETSIP	sp|Q01105|SET_HUMAN Protein SET OS=Homo sapiens OX=9606 GN=SET PE=1 SV=3;sp|P0DME0|SETLP_HUMAN Protein SETSIP OS=Homo sapiens OX=9606 GN=SETSIP PE=1 SV=1	2	10	10	10	9	0	7	7	7	8	5	9	0	7	7	7	8	5	9	0	7	7	7	8	5	49	49	49	33.488	290	290;302	0	323.31	By MS/MS		By MS/MS	By MS/MS	By MS/MS	By MS/MS	By MS/MS	46.6	0
Q01130;Q9BRL6	Q01130	5;2	5;2	5;2	Serine/arginine-rich splicing factor 2	SRSF2	sp|Q01130|SRSF2_HUMAN Serine/arginine-rich splicing factor 2 OS=Homo sapiens OX=9606 GN=SRSF2 PE=1 SV=4	2	5	5	5	2	0	2	2	2	5	2	2	0	2	2	2	5	2	2	0	2	2	2	5	2	22.6	22.6	22.6	25.476	221	221;282	0	20.429	By MS/MS		By MS/MS	By matching	By matching	By MS/MS	By MS/MS	6.8	0
Q01469;A8MUU1	Q01469	9;2	9;2	9;2	Fatty acid-binding protein, epidermal	FABP5	sp|Q01469|FABP5_HUMAN Fatty acid-binding protein 5 OS=Homo sapiens OX=9606 GN=FABP5 PE=1 SV=3	2	9	9	9	6	0	0	2	4	8	6	6	0	0	2	4	8	6	6	0	0	2	4	8	6	66.7	66.7	66.7	15.164	135	135;101	0	111.22	By MS/MS			By MS/MS	By MS/MS	By MS/MS	By MS/MS	40	0
Q01518	Q01518	18	18	17	Adenylyl cyclase-associated protein 1	CAP1	sp|Q01518|CAP1_HUMAN Adenylyl cyclase-associated protein 1 OS=Homo sapiens OX=9606 GN=CAP1 PE=1 SV=5	1	18	18	17	13	0	5	8	12	16	10	13	0	5	8	12	16	10	12	0	4	7	11	15	9	45.7	45.7	44	51.901	475	475	0	120.53	By MS/MS		By MS/MS	By MS/MS	By MS/MS	By MS/MS	By MS/MS	31.8	0
Q01581	Q01581	3	3	3	Hydroxymethylglutaryl-CoA synthase, cytoplasmic	HMGCS1	sp|Q01581|HMCS1_HUMAN Hydroxymethylglutaryl-CoA synthase, cytoplasmic OS=Homo sapiens OX=9606 GN=HMGCS1 PE=1 SV=2	1	3	3	3	0	0	0	0	0	3	0	0	0	0	0	0	3	0	0	0	0	0	0	3	0	5.4	5.4	5.4	57.293	520	520	0	4.4801						By MS/MS		0	0
Q01650;Q9UM01;Q92536	Q01650	5;1;1	5;1;1	5;1;1	Large neutral amino acids transporter small subunit 1	SLC7A5	sp|Q01650|LAT1_HUMAN Large neutral amino acids transporter small subunit 1 OS=Homo sapiens OX=9606 GN=SLC7A5 PE=1 SV=2	3	5	5	5	5	0	3	3	4	5	2	5	0	3	3	4	5	2	5	0	3	3	4	5	2	10.3	10.3	10.3	55.01	507	507;511;515	0	34.286	By MS/MS		By MS/MS	By matching	By MS/MS	By MS/MS	By MS/MS	10.3	0
Q01780	Q01780	1	1	1	Exosome component 10	EXOSC10	sp|Q01780|EXOSX_HUMAN Exosome component 10 OS=Homo sapiens OX=9606 GN=EXOSC10 PE=1 SV=2	1	1	1	1	0	0	0	0	0	1	0	0	0	0	0	0	1	0	0	0	0	0	0	1	0	1.1	1.1	1.1	100.83	885	885	0.0042042	1.7318						By MS/MS		0	0
Q01813	Q01813	19	19	16	ATP-dependent 6-phosphofructokinase, platelet type	PFKP	sp|Q01813|PFKAP_HUMAN ATP-dependent 6-phosphofructokinase, platelet type OS=Homo sapiens OX=9606 GN=PFKP PE=1 SV=2	1	19	19	16	15	0	4	4	13	15	7	15	0	4	4	13	15	7	13	0	3	4	13	13	6	26.7	26.7	22.3	85.595	784	784	0	64.736	By MS/MS		By matching	By matching	By MS/MS	By MS/MS	By MS/MS	22.1	0
Q01844	Q01844	4	4	4	RNA-binding protein EWS	EWSR1	sp|Q01844|EWS_HUMAN RNA-binding protein EWS OS=Homo sapiens OX=9606 GN=EWSR1 PE=1 SV=1	1	4	4	4	1	0	0	0	0	4	0	1	0	0	0	0	4	0	1	0	0	0	0	4	0	10.1	10.1	10.1	68.477	656	656	0	26.787	By matching					By MS/MS		2.1	0
Q01970	Q01970	1	1	1	1-phosphatidylinositol 4,5-bisphosphate phosphodiesterase beta-3	PLCB3	sp|Q01970|PLCB3_HUMAN 1-phosphatidylinositol 4,5-bisphosphate phosphodiesterase beta-3 OS=Homo sapiens OX=9606 GN=PLCB3 PE=1 SV=2	1	1	1	1	0	0	0	0	0	1	0	0	0	0	0	0	1	0	0	0	0	0	0	1	0	1.1	1.1	1.1	138.8	1234	1234	0.0012484	2.1008						By MS/MS		0	0
Q01995	Q01995	20	20	20	Transgelin	TAGLN	sp|Q01995|TAGL_HUMAN Transgelin OS=Homo sapiens OX=9606 GN=TAGLN PE=1 SV=4	1	20	20	20	15	0	2	3	14	19	12	15	0	2	3	14	19	12	15	0	2	3	14	19	12	79.6	79.6	79.6	22.611	201	201	0	191.76	By MS/MS		By matching	By MS/MS	By MS/MS	By MS/MS	By MS/MS	74.1	0
Q02218;Q9ULD0	Q02218	3;1	3;1	3;1	2-oxoglutarate dehydrogenase, mitochondrial	OGDH	sp|Q02218|ODO1_HUMAN 2-oxoglutarate dehydrogenase, mitochondrial OS=Homo sapiens OX=9606 GN=OGDH PE=1 SV=3	2	3	3	3	0	0	0	0	0	3	0	0	0	0	0	0	3	0	0	0	0	0	0	3	0	2.9	2.9	2.9	115.93	1023	1023;1010	0	5.3763						By MS/MS		0	0
Q02543	Q02543	8	8	8	60S ribosomal protein L18a	RPL18A	sp|Q02543|RL18A_HUMAN 60S ribosomal protein L18a OS=Homo sapiens OX=9606 GN=RPL18A PE=1 SV=2	1	8	8	8	4	0	3	3	3	8	3	4	0	3	3	3	8	3	4	0	3	3	3	8	3	43.8	43.8	43.8	20.762	176	176	0	47.958	By MS/MS		By MS/MS	By matching	By MS/MS	By MS/MS	By MS/MS	25.6	0
Q02750	Q02750	6	6	3	Dual specificity mitogen-activated protein kinase kinase 1	MAP2K1	sp|Q02750|MP2K1_HUMAN Dual specificity mitogen-activated protein kinase kinase 1 OS=Homo sapiens OX=9606 GN=MAP2K1 PE=1 SV=2	1	6	6	3	2	0	0	0	0	6	0	2	0	0	0	0	6	0	0	0	0	0	0	3	0	16	16	7.9	43.439	393	393	0	9.1814	By MS/MS					By MS/MS		5.1	0
Q02790	Q02790	16	16	16	Peptidyl-prolyl cis-trans isomerase FKBP4;Peptidyl-prolyl cis-trans isomerase FKBP4, N-terminally processed	FKBP4	sp|Q02790|FKBP4_HUMAN Peptidyl-prolyl cis-trans isomerase FKBP4 OS=Homo sapiens OX=9606 GN=FKBP4 PE=1 SV=3	1	16	16	16	8	0	5	4	4	16	4	8	0	5	4	4	16	4	8	0	5	4	4	16	4	43.4	43.4	43.4	51.804	459	459	0	55.361	By MS/MS		By MS/MS	By MS/MS	By MS/MS	By MS/MS	By MS/MS	20.9	0
Q02809	Q02809	3	3	3	Procollagen-lysine,2-oxoglutarate 5-dioxygenase 1	PLOD1	sp|Q02809|PLOD1_HUMAN Procollagen-lysine,2-oxoglutarate 5-dioxygenase 1 OS=Homo sapiens OX=9606 GN=PLOD1 PE=1 SV=2	1	3	3	3	0	0	0	0	0	3	0	0	0	0	0	0	3	0	0	0	0	0	0	3	0	5	5	5	83.549	727	727	0	4.1176						By MS/MS		0	0
Q02818	Q02818	3	3	3	Nucleobindin-1	NUCB1	sp|Q02818|NUCB1_HUMAN Nucleobindin-1 OS=Homo sapiens OX=9606 GN=NUCB1 PE=1 SV=4	1	3	3	3	2	0	0	0	2	1	1	2	0	0	0	2	1	1	2	0	0	0	2	1	1	6.5	6.5	6.5	53.879	461	461	0.0006689	2.7528	By MS/MS				By matching	By MS/MS	By matching	4.3	0
Q02878;REV__O75323	Q02878	17;1	17;1	17;1	60S ribosomal protein L6	RPL6	sp|Q02878|RL6_HUMAN 60S ribosomal protein L6 OS=Homo sapiens OX=9606 GN=RPL6 PE=1 SV=3	2	17	17	17	14	0	12	11	8	15	9	14	0	12	11	8	15	9	14	0	12	11	8	15	9	50.3	50.3	50.3	32.728	288	288;286	0	82.529	By MS/MS		By MS/MS	By MS/MS	By MS/MS	By MS/MS	By MS/MS	45.1	0
Q02952	Q02952	13	13	13	A-kinase anchor protein 12	AKAP12	sp|Q02952|AKA12_HUMAN A-kinase anchor protein 12 OS=Homo sapiens OX=9606 GN=AKAP12 PE=1 SV=4	1	13	13	13	6	0	4	2	3	10	1	6	0	4	2	3	10	1	6	0	4	2	3	10	1	11.4	11.4	11.4	191.48	1782	1782	0	40.676	By MS/MS		By matching	By matching	By matching	By MS/MS	By matching	5	0
Q02978	Q02978	2	2	2	Mitochondrial 2-oxoglutarate/malate carrier protein	SLC25A11	sp|Q02978|M2OM_HUMAN Mitochondrial 2-oxoglutarate/malate carrier protein OS=Homo sapiens OX=9606 GN=SLC25A11 PE=1 SV=3	1	2	2	2	1	0	0	0	0	2	0	1	0	0	0	0	2	0	1	0	0	0	0	2	0	10.2	10.2	10.2	34.061	314	314	0	44.493	By MS/MS					By MS/MS		5.1	0
Q03135;P56539	Q03135	4;1	4;1	4;1	Caveolin-1	CAV1	sp|Q03135|CAV1_HUMAN Caveolin-1 OS=Homo sapiens OX=9606 GN=CAV1 PE=1 SV=4	2	4	4	4	3	0	0	0	2	4	1	3	0	0	0	2	4	1	3	0	0	0	2	4	1	23	23	23	20.471	178	178;151	0	8.5417	By MS/MS				By MS/MS	By MS/MS	By matching	18	0
Q03252	Q03252	6	4	4	Lamin-B2	LMNB2	sp|Q03252|LMNB2_HUMAN Lamin-B2 OS=Homo sapiens OX=9606 GN=LMNB2 PE=1 SV=4	1	6	4	4	3	0	0	0	0	5	0	1	0	0	0	0	3	0	1	0	0	0	0	3	0	8.4	6.9	6.9	69.948	620	620	0	6.3914	By MS/MS					By MS/MS		3.2	0
Q04323	Q04323	3	3	3	UBX domain-containing protein 1	UBXN1	sp|Q04323|UBXN1_HUMAN UBX domain-containing protein 1 OS=Homo sapiens OX=9606 GN=UBXN1 PE=1 SV=2	1	3	3	3	2	0	0	1	1	3	0	2	0	0	1	1	3	0	2	0	0	1	1	3	0	11.8	11.8	11.8	33.325	297	297	0	12.368	By MS/MS			By matching	By matching	By MS/MS		6.4	0
Q04446	Q04446	5	5	5	1,4-alpha-glucan-branching enzyme	GBE1	sp|Q04446|GLGB_HUMAN 1,4-alpha-glucan-branching enzyme OS=Homo sapiens OX=9606 GN=GBE1 PE=1 SV=3	1	5	5	5	0	0	1	0	1	5	0	0	0	1	0	1	5	0	0	0	1	0	1	5	0	7.5	7.5	7.5	80.473	702	702	0	9.9341			By matching		By matching	By MS/MS		0	0
Q04637;O43432;REV__Q8NEG2	Q04637	23;2;1	23;2;1	23;2;1	Eukaryotic translation initiation factor 4 gamma 1	EIF4G1	sp|Q04637|IF4G1_HUMAN Eukaryotic translation initiation factor 4 gamma 1 OS=Homo sapiens OX=9606 GN=EIF4G1 PE=1 SV=4	3	23	23	23	15	0	2	4	9	16	0	15	0	2	4	9	16	0	15	0	2	4	9	16	0	18	18	18	175.49	1599	1599;1585;295	0	91.219	By MS/MS		By matching	By matching	By MS/MS	By MS/MS		11.7	0
Q04760	Q04760	6	6	6	Lactoylglutathione lyase	GLO1	sp|Q04760|LGUL_HUMAN Lactoylglutathione lyase OS=Homo sapiens OX=9606 GN=GLO1 PE=1 SV=4	1	6	6	6	4	0	3	4	4	5	2	4	0	3	4	4	5	2	4	0	3	4	4	5	2	40.8	40.8	40.8	20.777	184	184	0	13.898	By MS/MS		By matching	By matching	By MS/MS	By MS/MS	By MS/MS	22.3	0
Q04828	Q04828	14	14	1	Aldo-keto reductase family 1 member C1	AKR1C1	sp|Q04828|AK1C1_HUMAN Aldo-keto reductase family 1 member C1 OS=Homo sapiens OX=9606 GN=AKR1C1 PE=1 SV=1	1	14	14	1	12	0	6	6	12	10	4	12	0	6	6	12	10	4	0	0	0	0	0	1	0	51.7	51.7	5.3	36.788	323	323	0	115.53	By MS/MS		By MS/MS	By matching	By MS/MS	By MS/MS	By MS/MS	46.4	0
Q04837	Q04837	3	3	3	Single-stranded DNA-binding protein, mitochondrial	SSBP1	sp|Q04837|SSBP_HUMAN Single-stranded DNA-binding protein, mitochondrial OS=Homo sapiens OX=9606 GN=SSBP1 PE=1 SV=1	1	3	3	3	1	0	0	1	1	2	0	1	0	0	1	1	2	0	1	0	0	1	1	2	0	27.7	27.7	27.7	17.259	148	148	0	15.273	By MS/MS			By matching	By matching	By MS/MS		12.2	0
Q04917	Q04917	11	8	8	14-3-3 protein eta	YWHAH	sp|Q04917|1433F_HUMAN 14-3-3 protein eta OS=Homo sapiens OX=9606 GN=YWHAH PE=1 SV=4	1	11	8	8	9	1	7	5	7	10	5	7	0	5	3	5	7	3	7	0	5	3	5	7	3	43.1	32.9	32.9	28.218	246	246	0	48.186	By MS/MS	By matching	By matching	By MS/MS	By MS/MS	By MS/MS	By MS/MS	36.2	4.1
Q04941	Q04941	2	2	2	Proteolipid protein 2	PLP2	sp|Q04941|PLP2_HUMAN Proteolipid protein 2 OS=Homo sapiens OX=9606 GN=PLP2 PE=1 SV=1	1	2	2	2	1	0	1	0	0	2	0	1	0	1	0	0	2	0	1	0	1	0	0	2	0	18.4	18.4	18.4	16.691	152	152	0	18.014	By MS/MS		By MS/MS			By MS/MS		8.6	0
Q05519	Q05519	2	2	2	Serine/arginine-rich splicing factor 11	SRSF11	sp|Q05519|SRS11_HUMAN Serine/arginine-rich splicing factor 11 OS=Homo sapiens OX=9606 GN=SRSF11 PE=1 SV=1	1	2	2	2	2	0	0	0	1	0	0	2	0	0	0	1	0	0	2	0	0	0	1	0	0	7.2	7.2	7.2	53.542	484	484	0.00066578	2.6849	By MS/MS				By matching			7.2	0
Q05639	Q05639	12	3	3	Elongation factor 1-alpha 2	EEF1A2	sp|Q05639|EF1A2_HUMAN Elongation factor 1-alpha 2 OS=Homo sapiens OX=9606 GN=EEF1A2 PE=1 SV=1	1	12	3	3	8	3	8	7	7	9	6	1	0	0	0	0	2	0	1	0	0	0	0	2	0	31.7	11.7	11.7	50.47	463	463	0	8.6084	By MS/MS	By matching	By matching	By matching	By matching	By MS/MS	By matching	26.3	6.5
Q05682;REV__Q96JN2;REV__Q13136;REV__O75334;Q8WXF1	Q05682	31;1;1;1;1	31;1;1;1;1	31;1;1;1;1	Caldesmon	CALD1	sp|Q05682|CALD1_HUMAN Caldesmon OS=Homo sapiens OX=9606 GN=CALD1 PE=1 SV=3	5	31	31	31	20	0	14	12	16	27	13	20	0	14	12	16	27	13	20	0	14	12	16	27	13	35.9	35.9	35.9	93.23	793	793;1154;1202;1257;523	0	139.9	By MS/MS		By MS/MS	By MS/MS	By MS/MS	By MS/MS	By MS/MS	28.4	0
Q06203	Q06203	2	2	2	Amidophosphoribosyltransferase	PPAT	sp|Q06203|PUR1_HUMAN Amidophosphoribosyltransferase OS=Homo sapiens OX=9606 GN=PPAT PE=1 SV=1	1	2	2	2	1	0	0	0	1	2	0	1	0	0	0	1	2	0	1	0	0	0	1	2	0	5	5	5	57.398	517	517	0	3.6011	By MS/MS				By matching	By MS/MS		2.7	0
Q06210;O94808	Q06210	3;1	3;1	3;1	Glutamine--fructose-6-phosphate aminotransferase [isomerizing] 1	GFPT1	sp|Q06210|GFPT1_HUMAN Glutamine--fructose-6-phosphate aminotransferase [isomerizing] 1 OS=Homo sapiens OX=9606 GN=GFPT1 PE=1 SV=3	2	3	3	3	0	0	0	0	0	3	0	0	0	0	0	0	3	0	0	0	0	0	0	3	0	4.6	4.6	4.6	78.806	699	699;682	0	4.0923						By MS/MS		0	0
Q06265	Q06265	1	1	1	Exosome complex component RRP45	EXOSC9	sp|Q06265|EXOS9_HUMAN Exosome complex component RRP45 OS=Homo sapiens OX=9606 GN=EXOSC9 PE=1 SV=3	1	1	1	1	1	0	1	1	1	1	0	1	0	1	1	1	1	0	1	0	1	1	1	1	0	2.5	2.5	2.5	48.948	439	439	0	5.4816	By MS/MS		By matching	By matching	By matching	By MS/MS		2.5	0
Q06323	Q06323	4	4	4	Proteasome activator complex subunit 1	PSME1	sp|Q06323|PSME1_HUMAN Proteasome activator complex subunit 1 OS=Homo sapiens OX=9606 GN=PSME1 PE=1 SV=1	1	4	4	4	3	0	0	0	2	2	0	3	0	0	0	2	2	0	3	0	0	0	2	2	0	17.3	17.3	17.3	28.723	249	249	0	7.8755	By MS/MS				By matching	By MS/MS		12.4	0
Q06830	Q06830	17	17	14	Peroxiredoxin-1	PRDX1	sp|Q06830|PRDX1_HUMAN Peroxiredoxin-1 OS=Homo sapiens OX=9606 GN=PRDX1 PE=1 SV=1	1	17	17	14	13	1	13	11	15	15	13	13	1	13	11	15	15	13	10	0	10	8	12	12	10	76.4	76.4	63.3	22.11	199	199	0	182.07	By MS/MS	By matching	By MS/MS	By MS/MS	By MS/MS	By MS/MS	By MS/MS	72.9	3.5
Q07020	Q07020	7	7	7	60S ribosomal protein L18	RPL18	sp|Q07020|RL18_HUMAN 60S ribosomal protein L18 OS=Homo sapiens OX=9606 GN=RPL18 PE=1 SV=2	1	7	7	7	7	0	6	6	7	5	4	7	0	6	6	7	5	4	7	0	6	6	7	5	4	38.8	38.8	38.8	21.634	188	188	0	78.189	By MS/MS		By MS/MS	By MS/MS	By MS/MS	By MS/MS	By MS/MS	38.8	0
Q07021	Q07021	4	4	4	Complement component 1 Q subcomponent-binding protein, mitochondrial	C1QBP	sp|Q07021|C1QBP_HUMAN Complement component 1 Q subcomponent-binding protein, mitochondrial OS=Homo sapiens OX=9606 GN=C1QBP PE=1 SV=1	1	4	4	4	4	0	4	4	4	3	1	4	0	4	4	4	3	1	4	0	4	4	4	3	1	16.7	16.7	16.7	31.362	282	282	0	23.177	By MS/MS		By MS/MS	By MS/MS	By MS/MS	By MS/MS	By matching	16.7	0
Q07065	Q07065	18	18	18	Cytoskeleton-associated protein 4	CKAP4	sp|Q07065|CKAP4_HUMAN Cytoskeleton-associated protein 4 OS=Homo sapiens OX=9606 GN=CKAP4 PE=1 SV=2	1	18	18	18	12	0	2	4	12	13	1	12	0	2	4	12	13	1	12	0	2	4	12	13	1	35.9	35.9	35.9	66.022	602	602	0	92.846	By MS/MS		By matching	By matching	By MS/MS	By MS/MS	By matching	23.8	0
Q07157	Q07157	2	2	2	Tight junction protein ZO-1	TJP1	sp|Q07157|ZO1_HUMAN Tight junction protein ZO-1 OS=Homo sapiens OX=9606 GN=TJP1 PE=1 SV=3	1	2	2	2	2	0	0	0	0	2	0	2	0	0	0	0	2	0	2	0	0	0	0	2	0	1.9	1.9	1.9	195.46	1748	1748	0	7.1251	By MS/MS					By MS/MS		1.9	0
Q07283;REV__Q8N4Y2;Q5VU43	Q07283;REV__Q8N4Y2;Q5VU43	2;1;1	2;1;1	2;1;1	Trichohyalin;Myomegalin	TCHH;PDE4DIP	sp|Q07283|TRHY_HUMAN Trichohyalin OS=Homo sapiens OX=9606 GN=TCHH PE=1 SV=2;sp|Q8N4Y2|EFC4A_HUMAN EF-hand calcium-binding domain-containing protein 4A OS=Homo sapiens OX=9606 GN=CRACR2B PE=1 SV=3;sp|Q5VU43|MYOME_HUMAN Myomegalin OS=Homo sapiens OX=9606 GN=	3	2	2	2	1	0	0	0	1	1	0	1	0	0	0	1	1	0	1	0	0	0	1	1	0	0.8	0.8	0.8	253.92	1943	1943;399;2346	0.0070012	1.497	By MS/MS				By matching	By MS/MS		0.3	0
Q07666;O75525;Q5VWX1	Q07666	5;1;1	5;1;1	5;1;1	KH domain-containing, RNA-binding, signal transduction-associated protein 1	KHDRBS1	sp|Q07666|KHDR1_HUMAN KH domain-containing, RNA-binding, signal transduction-associated protein 1 OS=Homo sapiens OX=9606 GN=KHDRBS1 PE=1 SV=1	3	5	5	5	3	0	2	2	2	4	3	3	0	2	2	2	4	3	3	0	2	2	2	4	3	15.1	15.1	15.1	48.227	443	443;346;349	0	19.755	By MS/MS		By matching	By matching	By MS/MS	By MS/MS	By matching	9.9	0
Q07866;Q9H0B6	Q07866	7;2	7;2	7;2	Kinesin light chain 1	KLC1	sp|Q07866|KLC1_HUMAN Kinesin light chain 1 OS=Homo sapiens OX=9606 GN=KLC1 PE=1 SV=2	2	7	7	7	3	0	0	0	3	6	0	3	0	0	0	3	6	0	3	0	0	0	3	6	0	12.6	12.6	12.6	65.309	573	573;622	0	13.744	By MS/MS				By matching	By MS/MS		5.1	0
Q07955	Q07955	8	8	8	Serine/arginine-rich splicing factor 1	SRSF1	sp|Q07955|SRSF1_HUMAN Serine/arginine-rich splicing factor 1 OS=Homo sapiens OX=9606 GN=SRSF1 PE=1 SV=2	1	8	8	8	5	0	5	4	2	7	3	5	0	5	4	2	7	3	5	0	5	4	2	7	3	33.1	33.1	33.1	27.744	248	248	0	25.767	By MS/MS		By MS/MS	By MS/MS	By matching	By MS/MS	By MS/MS	22.2	0
Q07960	Q07960	5	5	5	Rho GTPase-activating protein 1	ARHGAP1	sp|Q07960|RHG01_HUMAN Rho GTPase-activating protein 1 OS=Homo sapiens OX=9606 GN=ARHGAP1 PE=1 SV=1	1	5	5	5	4	0	0	0	2	3	0	4	0	0	0	2	3	0	4	0	0	0	2	3	0	11.2	11.2	11.2	50.435	439	439	0	9.3158	By MS/MS				By matching	By MS/MS		9.3	0
Q08170	Q08170	6	2	2	Serine/arginine-rich splicing factor 4	SRSF4	sp|Q08170|SRSF4_HUMAN Serine/arginine-rich splicing factor 4 OS=Homo sapiens OX=9606 GN=SRSF4 PE=1 SV=2	1	6	2	2	1	0	2	1	1	6	3	0	0	0	0	0	2	0	0	0	0	0	0	2	0	11.5	4.5	4.5	56.678	494	494	0	9.809	By matching		By matching	By matching	By matching	By MS/MS	By matching	1.8	0
Q08209;P16298	Q08209	4;1	4;1	4;1	Serine/threonine-protein phosphatase 2B catalytic subunit alpha isoform	PPP3CA	sp|Q08209|PP2BA_HUMAN Serine/threonine-protein phosphatase 2B catalytic subunit alpha isoform OS=Homo sapiens OX=9606 GN=PPP3CA PE=1 SV=1	2	4	4	4	2	1	0	0	1	4	0	2	1	0	0	1	4	0	2	1	0	0	1	4	0	7.9	7.9	7.9	58.687	521	521;524	0	6.6656	By MS/MS	By matching			By matching	By MS/MS		4.4	1.9
Q08211	Q08211	27	27	27	ATP-dependent RNA helicase A	DHX9	sp|Q08211|DHX9_HUMAN ATP-dependent RNA helicase A OS=Homo sapiens OX=9606 GN=DHX9 PE=1 SV=4	1	27	27	27	16	0	11	11	13	22	4	16	0	11	11	13	22	4	16	0	11	11	13	22	4	24.3	24.3	24.3	140.96	1270	1270	0	98.444	By MS/MS		By MS/MS	By MS/MS	By MS/MS	By MS/MS	By matching	14.1	0
Q08257	Q08257	5	5	5	Quinone oxidoreductase	CRYZ	sp|Q08257|QOR_HUMAN Quinone oxidoreductase OS=Homo sapiens OX=9606 GN=CRYZ PE=1 SV=1	1	5	5	5	4	0	0	0	4	4	1	4	0	0	0	4	4	1	4	0	0	0	4	4	1	19.5	19.5	19.5	35.206	329	329	0	19.136	By MS/MS				By matching	By MS/MS	By matching	15.2	0
Q08380	Q08380	1	1	1	Galectin-3-binding protein	LGALS3BP	sp|Q08380|LG3BP_HUMAN Galectin-3-binding protein OS=Homo sapiens OX=9606 GN=LGALS3BP PE=1 SV=1	1	1	1	1	0	0	0	0	0	1	0	0	0	0	0	0	1	0	0	0	0	0	0	1	0	1.9	1.9	1.9	65.33	585	585	0	5.413						By MS/MS		0	0
Q08554	Q08554	1	1	1	Desmocollin-1	DSC1	sp|Q08554|DSC1_HUMAN Desmocollin-1 OS=Homo sapiens OX=9606 GN=DSC1 PE=1 SV=2	1	1	1	1	1	0	1	1	1	0	0	1	0	1	1	1	0	0	1	0	1	1	1	0	0	1.5	1.5	1.5	99.986	894	894	0.0036608	1.8383	By matching		By MS/MS	By matching	By matching			1.5	0
Q08752	Q08752	3	3	3	Peptidyl-prolyl cis-trans isomerase D	PPID	sp|Q08752|PPID_HUMAN Peptidyl-prolyl cis-trans isomerase D OS=Homo sapiens OX=9606 GN=PPID PE=1 SV=3	1	3	3	3	1	0	0	0	0	3	0	1	0	0	0	0	3	0	1	0	0	0	0	3	0	8.9	8.9	8.9	40.763	370	370	0	5.2576	By MS/MS					By MS/MS		4.3	0
Q08945	Q08945	9	9	9	FACT complex subunit SSRP1	SSRP1	sp|Q08945|SSRP1_HUMAN FACT complex subunit SSRP1 OS=Homo sapiens OX=9606 GN=SSRP1 PE=1 SV=1	1	9	9	9	5	0	3	3	3	8	1	5	0	3	3	3	8	1	5	0	3	3	3	8	1	15.1	15.1	15.1	81.074	709	709	0	15.692	By MS/MS		By matching	By matching	By matching	By MS/MS	By matching	8.9	0
Q08J23	Q08J23	18	18	18	tRNA (cytosine(34)-C(5))-methyltransferase	NSUN2	sp|Q08J23|NSUN2_HUMAN tRNA (cytosine(34)-C(5))-methyltransferase OS=Homo sapiens OX=9606 GN=NSUN2 PE=1 SV=2	1	18	18	18	11	0	6	5	8	16	4	11	0	6	5	8	16	4	11	0	6	5	8	16	4	30.1	30.1	30.1	86.47	767	767	0	117.13	By MS/MS		By MS/MS	By matching	By matching	By MS/MS	By matching	19.7	0
Q09028	Q09028	14	14	7	Histone-binding protein RBBP4	RBBP4	sp|Q09028|RBBP4_HUMAN Histone-binding protein RBBP4 OS=Homo sapiens OX=9606 GN=RBBP4 PE=1 SV=3	1	14	14	7	6	0	2	1	4	13	2	6	0	2	1	4	13	2	3	0	1	1	0	6	1	37.9	37.9	25.4	47.655	425	425	0	116.58	By MS/MS		By matching	By matching	By MS/MS	By MS/MS	By matching	24.5	0
Q09666	Q09666	137	137	137	Neuroblast differentiation-associated protein AHNAK	AHNAK	sp|Q09666|AHNK_HUMAN Neuroblast differentiation-associated protein AHNAK OS=Homo sapiens OX=9606 GN=AHNAK PE=1 SV=2	1	137	137	137	122	0	62	39	83	92	31	122	0	62	39	83	92	31	122	0	62	39	83	92	31	45.2	45.2	45.2	629.09	5890	5890	0	323.31	By MS/MS		By MS/MS	By MS/MS	By MS/MS	By MS/MS	By MS/MS	39.4	0
Q0VGL1	Q0VGL1	1	1	1	Ragulator complex protein LAMTOR4;Ragulator complex protein LAMTOR4, N-terminally processed	LAMTOR4	sp|Q0VGL1|LTOR4_HUMAN Ragulator complex protein LAMTOR4 OS=Homo sapiens OX=9606 GN=LAMTOR4 PE=1 SV=1	1	1	1	1	0	0	0	0	0	1	0	0	0	0	0	0	1	0	0	0	0	0	0	1	0	10.1	10.1	10.1	10.741	99	99	0.004222	1.7636						By MS/MS		0	0
Q10471	Q10471	11	11	11	Polypeptide N-acetylgalactosaminyltransferase 2;Polypeptide N-acetylgalactosaminyltransferase 2 soluble form	GALNT2	sp|Q10471|GALT2_HUMAN Polypeptide N-acetylgalactosaminyltransferase 2 OS=Homo sapiens OX=9606 GN=GALNT2 PE=1 SV=1	1	11	11	11	4	0	3	3	4	9	4	4	0	3	3	4	9	4	4	0	3	3	4	9	4	21	21	21	64.732	571	571	0	30.531	By MS/MS		By matching	By matching	By matching	By MS/MS	By MS/MS	8.6	0
Q10567	Q10567	7	2	2	AP-1 complex subunit beta-1	AP1B1	sp|Q10567|AP1B1_HUMAN AP-1 complex subunit beta-1 OS=Homo sapiens OX=9606 GN=AP1B1 PE=1 SV=2	1	7	2	2	4	0	1	0	2	5	0	1	0	1	0	1	1	0	1	0	1	0	1	1	0	7.7	2.2	2.2	104.64	949	949	0.0042017	1.7241	By MS/MS		By matching		By matching	By MS/MS		4.3	0
Q10589	Q10589	2	2	2	Bone marrow stromal antigen 2	BST2	sp|Q10589|BST2_HUMAN Bone marrow stromal antigen 2 OS=Homo sapiens OX=9606 GN=BST2 PE=1 SV=1	1	2	2	2	2	0	1	0	0	1	0	2	0	1	0	0	1	0	2	0	1	0	0	1	0	13.9	13.9	13.9	19.769	180	180	0	5.4469	By MS/MS		By matching			By MS/MS		13.9	0
Q10713	Q10713	3	3	3	Mitochondrial-processing peptidase subunit alpha	PMPCA	sp|Q10713|MPPA_HUMAN Mitochondrial-processing peptidase subunit alpha OS=Homo sapiens OX=9606 GN=PMPCA PE=1 SV=2	1	3	3	3	1	0	0	0	1	3	0	1	0	0	0	1	3	0	1	0	0	0	1	3	0	7	7	7	58.252	525	525	0	4.6821	By MS/MS				By matching	By MS/MS		2.1	0
Q12765	Q12765	3	3	3	Secernin-1	SCRN1	sp|Q12765|SCRN1_HUMAN Secernin-1 OS=Homo sapiens OX=9606 GN=SCRN1 PE=1 SV=2	1	3	3	3	1	0	0	0	0	2	0	1	0	0	0	0	2	0	1	0	0	0	0	2	0	9.7	9.7	9.7	46.382	414	414	0	5.4444	By MS/MS					By MS/MS		2.7	0
Q12769	Q12769	3	3	3	Nuclear pore complex protein Nup160	NUP160	sp|Q12769|NU160_HUMAN Nuclear pore complex protein Nup160 OS=Homo sapiens OX=9606 GN=NUP160 PE=1 SV=3	1	3	3	3	1	0	0	0	0	2	0	1	0	0	0	0	2	0	1	0	0	0	0	2	0	2.2	2.2	2.2	162.12	1436	1436	0	3.5864	By MS/MS					By MS/MS		0.7	0
Q12788	Q12788	1	1	1	Transducin beta-like protein 3	TBL3	sp|Q12788|TBL3_HUMAN Transducin beta-like protein 3 OS=Homo sapiens OX=9606 GN=TBL3 PE=1 SV=2	1	1	1	1	0	0	0	0	0	1	0	0	0	0	0	0	1	0	0	0	0	0	0	1	0	1.1	1.1	1.1	89.034	808	808	0.0096208	1.3443						By MS/MS		0	0
Q12792	Q12792	5	5	5	Twinfilin-1	TWF1	sp|Q12792|TWF1_HUMAN Twinfilin-1 OS=Homo sapiens OX=9606 GN=TWF1 PE=1 SV=3	1	5	5	5	3	0	1	0	2	3	1	3	0	1	0	2	3	1	3	0	1	0	2	3	1	16	16	16	40.282	350	350	0	43.438	By MS/MS		By matching		By matching	By MS/MS	By matching	10.3	0
Q12797	Q12797	6	6	6	Aspartyl/asparaginyl beta-hydroxylase	ASPH	sp|Q12797|ASPH_HUMAN Aspartyl/asparaginyl beta-hydroxylase OS=Homo sapiens OX=9606 GN=ASPH PE=1 SV=3	1	6	6	6	2	0	1	1	1	6	0	2	0	1	1	1	6	0	2	0	1	1	1	6	0	9.4	9.4	9.4	85.862	758	758	0	26.46	By MS/MS		By matching	By matching	By matching	By MS/MS		2.5	0
Q12849	Q12849	3	3	3	G-rich sequence factor 1	GRSF1	sp|Q12849|GRSF1_HUMAN G-rich sequence factor 1 OS=Homo sapiens OX=9606 GN=GRSF1 PE=1 SV=3	1	3	3	3	3	0	0	0	1	1	0	3	0	0	0	1	1	0	3	0	0	0	1	1	0	9.4	9.4	9.4	53.126	480	480	0	7.1657	By MS/MS				By matching	By MS/MS		9.4	0
Q12874	Q12874	4	4	4	Splicing factor 3A subunit 3	SF3A3	sp|Q12874|SF3A3_HUMAN Splicing factor 3A subunit 3 OS=Homo sapiens OX=9606 GN=SF3A3 PE=1 SV=1	1	4	4	4	1	0	1	0	1	3	0	1	0	1	0	1	3	0	1	0	1	0	1	3	0	8.6	8.6	8.6	58.848	501	501	0	8.5081	By MS/MS		By matching		By matching	By MS/MS		2.6	0
Q12904	Q12904	9	9	9	Aminoacyl tRNA synthase complex-interacting multifunctional protein 1;Endothelial monocyte-activating polypeptide 2	AIMP1	sp|Q12904|AIMP1_HUMAN Aminoacyl tRNA synthase complex-interacting multifunctional protein 1 OS=Homo sapiens OX=9606 GN=AIMP1 PE=1 SV=2	1	9	9	9	6	0	0	1	2	6	3	6	0	0	1	2	6	3	6	0	0	1	2	6	3	34.9	34.9	34.9	34.352	312	312	0	29.58	By MS/MS			By matching	By matching	By MS/MS	By matching	22.8	0
Q12905	Q12905	4	4	4	Interleukin enhancer-binding factor 2	ILF2	sp|Q12905|ILF2_HUMAN Interleukin enhancer-binding factor 2 OS=Homo sapiens OX=9606 GN=ILF2 PE=1 SV=2	1	4	4	4	2	0	0	0	1	3	0	2	0	0	0	1	3	0	2	0	0	0	1	3	0	14.6	14.6	14.6	43.062	390	390	0	19.544	By MS/MS				By matching	By MS/MS		8.5	0
Q12906	Q12906	16	16	14	Interleukin enhancer-binding factor 3	ILF3	sp|Q12906|ILF3_HUMAN Interleukin enhancer-binding factor 3 OS=Homo sapiens OX=9606 GN=ILF3 PE=1 SV=3	1	16	16	14	8	0	5	7	6	12	2	8	0	5	7	6	12	2	7	0	5	6	5	10	2	21.3	21.3	18.8	95.337	894	894	0	33.336	By MS/MS		By MS/MS	By MS/MS	By MS/MS	By MS/MS	By MS/MS	11.9	0
Q12907	Q12907	3	3	3	Vesicular integral-membrane protein VIP36	LMAN2	sp|Q12907|LMAN2_HUMAN Vesicular integral-membrane protein VIP36 OS=Homo sapiens OX=9606 GN=LMAN2 PE=1 SV=1	1	3	3	3	2	0	0	0	1	2	0	2	0	0	0	1	2	0	2	0	0	0	1	2	0	8.1	8.1	8.1	40.228	356	356	0	4.9266	By MS/MS				By matching	By MS/MS		5.6	0
Q12931	Q12931	10	10	10	Heat shock protein 75 kDa, mitochondrial	TRAP1	sp|Q12931|TRAP1_HUMAN Heat shock protein 75 kDa, mitochondrial OS=Homo sapiens OX=9606 GN=TRAP1 PE=1 SV=3	1	10	10	10	6	0	3	2	2	8	1	6	0	3	2	2	8	1	6	0	3	2	2	8	1	15.3	15.3	15.3	80.109	704	704	0	24.229	By MS/MS		By matching	By matching	By matching	By MS/MS	By matching	9.9	0
Q12933	Q12933	1	1	1	TNF receptor-associated factor 2	TRAF2	sp|Q12933|TRAF2_HUMAN TNF receptor-associated factor 2 OS=Homo sapiens OX=9606 GN=TRAF2 PE=1 SV=2	1	1	1	1	0	0	0	0	0	1	0	0	0	0	0	0	1	0	0	0	0	0	0	1	0	1.8	1.8	1.8	55.859	501	501	0.0058997	1.5977						By MS/MS		0	0
Q12965	Q12965	4	4	4	Unconventional myosin-Ie	MYO1E	sp|Q12965|MYO1E_HUMAN Unconventional myosin-Ie OS=Homo sapiens OX=9606 GN=MYO1E PE=1 SV=2	1	4	4	4	1	0	1	1	1	3	0	1	0	1	1	1	3	0	1	0	1	1	1	3	0	4.2	4.2	4.2	127.06	1108	1108	0	6.1468	By MS/MS		By matching	By matching	By matching	By MS/MS		1.1	0
Q12972	Q12972	1	1	1	Nuclear inhibitor of protein phosphatase 1;Activator of RNA decay	PPP1R8	sp|Q12972|PP1R8_HUMAN Nuclear inhibitor of protein phosphatase 1 OS=Homo sapiens OX=9606 GN=PPP1R8 PE=1 SV=2	1	1	1	1	0	0	0	0	0	1	0	0	0	0	0	0	1	0	0	0	0	0	0	1	0	4.8	4.8	4.8	38.478	351	351	0	3.6196						By MS/MS		0	0
Q12974;Q93096	Q12974;Q93096	2;2	2;2	2;2	Protein tyrosine phosphatase type IVA 2;Protein tyrosine phosphatase type IVA 1	PTP4A2;PTP4A1	sp|Q12974|TP4A2_HUMAN Protein tyrosine phosphatase type IVA 2 OS=Homo sapiens OX=9606 GN=PTP4A2 PE=1 SV=1;sp|Q93096|TP4A1_HUMAN Protein tyrosine phosphatase type IVA 1 OS=Homo sapiens OX=9606 GN=PTP4A1 PE=1 SV=2	2	2	2	2	1	0	1	0	1	2	0	1	0	1	0	1	2	0	1	0	1	0	1	2	0	13.8	13.8	13.8	19.127	167	167;173	0	4.598	By MS/MS		By matching		By matching	By MS/MS		8.4	0
Q13011	Q13011	3	3	3	Delta(3,5)-Delta(2,4)-dienoyl-CoA isomerase, mitochondrial	ECH1	sp|Q13011|ECH1_HUMAN Delta(3,5)-Delta(2,4)-dienoyl-CoA isomerase, mitochondrial OS=Homo sapiens OX=9606 GN=ECH1 PE=1 SV=2	1	3	3	3	1	0	0	1	0	2	1	1	0	0	1	0	2	1	1	0	0	1	0	2	1	10.7	10.7	10.7	35.816	328	328	0	4.5992	By MS/MS			By matching		By MS/MS	By matching	4.9	0
Q13045	Q13045	4	4	4	Protein flightless-1 homolog	FLII	sp|Q13045|FLII_HUMAN Protein flightless-1 homolog OS=Homo sapiens OX=9606 GN=FLII PE=1 SV=2	1	4	4	4	3	0	0	0	3	1	0	3	0	0	0	3	1	0	3	0	0	0	3	1	0	3.4	3.4	3.4	144.75	1269	1269	0	6.0992	By MS/MS				By matching	By MS/MS		2.6	0
Q13098	Q13098	6	6	6	COP9 signalosome complex subunit 1	GPS1	sp|Q13098|CSN1_HUMAN COP9 signalosome complex subunit 1 OS=Homo sapiens OX=9606 GN=GPS1 PE=1 SV=4	1	6	6	6	2	0	1	1	2	6	0	2	0	1	1	2	6	0	2	0	1	1	2	6	0	14.3	14.3	14.3	55.536	491	491	0	12.657	By MS/MS		By matching	By matching	By matching	By MS/MS		4.5	0
Q13126	Q13126	9	9	9	S-methyl-5-thioadenosine phosphorylase	MTAP	sp|Q13126|MTAP_HUMAN S-methyl-5-thioadenosine phosphorylase OS=Homo sapiens OX=9606 GN=MTAP PE=1 SV=2	1	9	9	9	5	0	1	2	2	7	0	5	0	1	2	2	7	0	5	0	1	2	2	7	0	41.7	41.7	41.7	31.236	283	283	0	29.405	By MS/MS		By matching	By matching	By MS/MS	By MS/MS		24.7	0
Q13148	Q13148	5	5	5	TAR DNA-binding protein 43	TARDBP	sp|Q13148|TADBP_HUMAN TAR DNA-binding protein 43 OS=Homo sapiens OX=9606 GN=TARDBP PE=1 SV=1	1	5	5	5	2	0	2	2	2	4	1	2	0	2	2	2	4	1	2	0	2	2	2	4	1	14	14	14	44.739	414	414	0	38.202	By MS/MS		By matching	By matching	By MS/MS	By MS/MS	By matching	7.2	0
Q13151	Q13151	6	6	6	Heterogeneous nuclear ribonucleoprotein A0	HNRNPA0	sp|Q13151|ROA0_HUMAN Heterogeneous nuclear ribonucleoprotein A0 OS=Homo sapiens OX=9606 GN=HNRNPA0 PE=1 SV=1	1	6	6	6	4	0	2	1	2	2	1	4	0	2	1	2	2	1	4	0	2	1	2	2	1	23.6	23.6	23.6	30.84	305	305	0	26.444	By MS/MS		By matching	By matching	By matching	By MS/MS	By matching	14.4	0
Q13155	Q13155	3	3	3	Aminoacyl tRNA synthase complex-interacting multifunctional protein 2	AIMP2	sp|Q13155|AIMP2_HUMAN Aminoacyl tRNA synthase complex-interacting multifunctional protein 2 OS=Homo sapiens OX=9606 GN=AIMP2 PE=1 SV=2	1	3	3	3	3	0	1	0	2	1	0	3	0	1	0	2	1	0	3	0	1	0	2	1	0	15.6	15.6	15.6	35.348	320	320	0	6.6688	By MS/MS		By matching		By matching	By MS/MS		15.6	0
Q13162	Q13162	3	1	1	Peroxiredoxin-4	PRDX4	sp|Q13162|PRDX4_HUMAN Peroxiredoxin-4 OS=Homo sapiens OX=9606 GN=PRDX4 PE=1 SV=1	1	3	1	1	3	1	3	2	2	3	2	1	0	1	0	0	1	0	1	0	1	0	0	1	0	13.3	7.7	7.7	30.54	271	271	0	8.4962	By MS/MS	By matching	By matching	By matching	By matching	By MS/MS	By matching	13.3	2.6
Q13177;O75914;Q13153	Q13177;O75914	4;2;1	4;2;1	4;2;1	Serine/threonine-protein kinase PAK 2;PAK-2p27;PAK-2p34;Serine/threonine-protein kinase PAK 3	PAK2;PAK3	sp|Q13177|PAK2_HUMAN Serine/threonine-protein kinase PAK 2 OS=Homo sapiens OX=9606 GN=PAK2 PE=1 SV=3;sp|O75914|PAK3_HUMAN Serine/threonine-protein kinase PAK 3 OS=Homo sapiens OX=9606 GN=PAK3 PE=1 SV=2	3	4	4	4	3	0	0	1	3	4	0	3	0	0	1	3	4	0	3	0	0	1	3	4	0	10.7	10.7	10.7	58.042	524	524;559;545	0	13.021	By MS/MS			By matching	By MS/MS	By MS/MS		7.6	0
Q13185	Q13185	5	5	5	Chromobox protein homolog 3	CBX3	sp|Q13185|CBX3_HUMAN Chromobox protein homolog 3 OS=Homo sapiens OX=9606 GN=CBX3 PE=1 SV=4	1	5	5	5	2	0	2	0	1	5	0	2	0	2	0	1	5	0	2	0	2	0	1	5	0	27.3	27.3	27.3	20.811	183	183	0	15.904	By MS/MS		By matching		By matching	By MS/MS		7.7	0
Q13200	Q13200	16	16	16	26S proteasome non-ATPase regulatory subunit 2	PSMD2	sp|Q13200|PSMD2_HUMAN 26S proteasome non-ATPase regulatory subunit 2 OS=Homo sapiens OX=9606 GN=PSMD2 PE=1 SV=3	1	16	16	16	9	0	2	1	8	16	4	9	0	2	1	8	16	4	9	0	2	1	8	16	4	21.7	21.7	21.7	100.2	908	908	0	65.937	By MS/MS		By matching	By MS/MS	By MS/MS	By MS/MS	By MS/MS	13.1	0
Q13242	Q13242	3	3	3	Serine/arginine-rich splicing factor 9	SRSF9	sp|Q13242|SRSF9_HUMAN Serine/arginine-rich splicing factor 9 OS=Homo sapiens OX=9606 GN=SRSF9 PE=1 SV=1	1	3	3	3	2	0	0	0	0	3	0	2	0	0	0	0	3	0	2	0	0	0	0	3	0	14.9	14.9	14.9	25.542	221	221	0	7.3008	By matching					By MS/MS		10	0
Q13243	Q13243	3	2	2	Serine/arginine-rich splicing factor 5	SRSF5	sp|Q13243|SRSF5_HUMAN Serine/arginine-rich splicing factor 5 OS=Homo sapiens OX=9606 GN=SRSF5 PE=1 SV=1	1	3	2	2	2	0	2	2	2	3	1	1	0	1	1	1	2	0	1	0	1	1	1	2	0	11	7.7	7.7	31.263	272	272	0.00068306	3.0739	By MS/MS		By matching	By matching	By matching	By MS/MS	By matching	8.5	0
Q13247	Q13247	9	9	5	Serine/arginine-rich splicing factor 6	SRSF6	sp|Q13247|SRSF6_HUMAN Serine/arginine-rich splicing factor 6 OS=Homo sapiens OX=9606 GN=SRSF6 PE=1 SV=2	1	9	9	5	3	0	3	2	2	9	3	3	0	3	2	2	9	3	2	0	1	1	1	5	0	20.1	20.1	13.4	39.586	344	344	0	16.613	By MS/MS		By MS/MS	By MS/MS	By MS/MS	By MS/MS	By MS/MS	9.3	0
Q13263	Q13263	9	9	9	Transcription intermediary factor 1-beta	TRIM28	sp|Q13263|TIF1B_HUMAN Transcription intermediary factor 1-beta OS=Homo sapiens OX=9606 GN=TRIM28 PE=1 SV=5	1	9	9	9	3	0	1	0	3	8	1	3	0	1	0	3	8	1	3	0	1	0	3	8	1	15.8	15.8	15.8	88.549	835	835	0	57.098	By MS/MS		By matching		By MS/MS	By MS/MS	By matching	4.3	0
Q13283	Q13283	12	12	10	Ras GTPase-activating protein-binding protein 1	G3BP1	sp|Q13283|G3BP1_HUMAN Ras GTPase-activating protein-binding protein 1 OS=Homo sapiens OX=9606 GN=G3BP1 PE=1 SV=1	1	12	12	10	8	0	7	4	7	9	1	8	0	7	4	7	9	1	7	0	7	4	7	7	1	32.8	32.8	30.3	52.164	466	466	0	69.518	By MS/MS		By matching	By matching	By MS/MS	By MS/MS	By MS/MS	23.2	0
Q13310;P0CB38	Q13310	17;1	10;1	9;1	Polyadenylate-binding protein 4	PABPC4	sp|Q13310|PABP4_HUMAN Polyadenylate-binding protein 4 OS=Homo sapiens OX=9606 GN=PABPC4 PE=1 SV=1	2	17	10	9	12	0	4	7	8	9	2	6	0	1	4	3	7	0	5	0	0	3	3	7	0	34.9	19.4	18	70.782	644	644;370	0	24.774	By MS/MS		By matching	By matching	By MS/MS	By MS/MS	By matching	26.6	0
Q13347	Q13347	8	8	8	Eukaryotic translation initiation factor 3 subunit I	EIF3I	sp|Q13347|EIF3I_HUMAN Eukaryotic translation initiation factor 3 subunit I OS=Homo sapiens OX=9606 GN=EIF3I PE=1 SV=1	1	8	8	8	5	0	2	3	4	8	4	5	0	2	3	4	8	4	5	0	2	3	4	8	4	27.1	27.1	27.1	36.501	325	325	0	54.849	By MS/MS		By matching	By MS/MS	By MS/MS	By MS/MS	By MS/MS	17.5	0
Q16537;Q15173;Q13362;Q14738	Q16537;Q15173;Q13362;Q14738	1;1;1;1	1;1;1;1	1;1;1;1	Serine/threonine-protein phosphatase 2A 56 kDa regulatory subunit epsilon isoform;Serine/threonine-protein phosphatase 2A 56 kDa regulatory subunit beta isoform;Serine/threonine-protein phosphatase 2A 56 kDa regulatory subunit gamma isoform;Serine/threonine-protein phosphatase 2A 56 kDa regulatory subunit delta isoform	PPP2R5E;PPP2R5B;PPP2R5C;PPP2R5D	sp|Q16537|2A5E_HUMAN Serine/threonine-protein phosphatase 2A 56 kDa regulatory subunit epsilon isoform OS=Homo sapiens OX=9606 GN=PPP2R5E PE=1 SV=1;sp|Q15173|2A5B_HUMAN Serine/threonine-protein phosphatase 2A 56 kDa regulatory subunit beta isoform OS=Homo	4	1	1	1	1	0	0	0	0	1	0	1	0	0	0	0	1	0	1	0	0	0	0	1	0	2.6	2.6	2.6	54.699	467	467;497;524;602	0.002457	1.8829	By MS/MS					By MS/MS		2.6	0
Q13404;Q15819	Q13404	5;2	5;2	5;2	Ubiquitin-conjugating enzyme E2 variant 1	UBE2V1	sp|Q13404|UB2V1_HUMAN Ubiquitin-conjugating enzyme E2 variant 1 OS=Homo sapiens OX=9606 GN=UBE2V1 PE=1 SV=2	2	5	5	5	3	0	3	3	2	4	2	3	0	3	3	2	4	2	3	0	3	3	2	4	2	34.7	34.7	34.7	16.495	147	147;145	0	6.5134	By MS/MS		By matching	By matching	By MS/MS	By MS/MS	By matching	17.7	0
Q13409	Q13409	5	5	5	Cytoplasmic dynein 1 intermediate chain 2	DYNC1I2	sp|Q13409|DC1I2_HUMAN Cytoplasmic dynein 1 intermediate chain 2 OS=Homo sapiens OX=9606 GN=DYNC1I2 PE=1 SV=3	1	5	5	5	2	0	0	0	1	5	0	2	0	0	0	1	5	0	2	0	0	0	1	5	0	7.7	7.7	7.7	71.456	638	638	0	14.644	By MS/MS				By matching	By MS/MS		3.9	0
Q13418	Q13418	6	6	6	Integrin-linked protein kinase	ILK	sp|Q13418|ILK_HUMAN Integrin-linked protein kinase OS=Homo sapiens OX=9606 GN=ILK PE=1 SV=2	1	6	6	6	2	0	0	0	1	6	0	2	0	0	0	1	6	0	2	0	0	0	1	6	0	12.6	12.6	12.6	51.419	452	452	0	8.7672	By MS/MS				By matching	By MS/MS		5.1	0
Q13423	Q13423	9	9	9	NAD(P) transhydrogenase, mitochondrial	NNT	sp|Q13423|NNTM_HUMAN NAD(P) transhydrogenase, mitochondrial OS=Homo sapiens OX=9606 GN=NNT PE=1 SV=3	1	9	9	9	6	0	3	2	5	4	0	6	0	3	2	5	4	0	6	0	3	2	5	4	0	10.5	10.5	10.5	113.89	1086	1086	0	17.797	By MS/MS		By matching	By matching	By MS/MS	By MS/MS		7.6	0
Q13428	Q13428	14	14	14	Treacle protein	TCOF1	sp|Q13428|TCOF_HUMAN Treacle protein OS=Homo sapiens OX=9606 GN=TCOF1 PE=1 SV=3	1	14	14	14	9	0	0	2	2	12	0	9	0	0	2	2	12	0	9	0	0	2	2	12	0	10.1	10.1	10.1	152.1	1488	1488	0	25.453	By MS/MS			By matching	By matching	By MS/MS		6.5	0
Q13435	Q13435	9	9	9	Splicing factor 3B subunit 2	SF3B2	sp|Q13435|SF3B2_HUMAN Splicing factor 3B subunit 2 OS=Homo sapiens OX=9606 GN=SF3B2 PE=1 SV=2	1	9	9	9	8	0	3	4	5	7	0	8	0	3	4	5	7	0	8	0	3	4	5	7	0	9.9	9.9	9.9	100.23	895	895	0	22.506	By MS/MS		By matching	By matching	By matching	By MS/MS		9.3	0
Q13442	Q13442	5	5	5	28 kDa heat- and acid-stable phosphoprotein	PDAP1	sp|Q13442|HAP28_HUMAN 28 kDa heat- and acid-stable phosphoprotein OS=Homo sapiens OX=9606 GN=PDAP1 PE=1 SV=1	1	5	5	5	3	0	0	0	2	3	0	3	0	0	0	2	3	0	3	0	0	0	2	3	0	33.1	33.1	33.1	20.63	181	181	0	39.715	By MS/MS				By MS/MS	By MS/MS		13.8	0
Q13492;O60641	Q13492	5;1	5;1	5;1	Phosphatidylinositol-binding clathrin assembly protein	PICALM	sp|Q13492|PICAL_HUMAN Phosphatidylinositol-binding clathrin assembly protein OS=Homo sapiens OX=9606 GN=PICALM PE=1 SV=2	2	5	5	5	4	0	0	0	1	1	0	4	0	0	0	1	1	0	4	0	0	0	1	1	0	10.1	10.1	10.1	70.754	652	652;907	0	21.315	By MS/MS				By matching	By MS/MS		8.6	0
Q13501	Q13501	9	9	9	Sequestosome-1	SQSTM1	sp|Q13501|SQSTM_HUMAN Sequestosome-1 OS=Homo sapiens OX=9606 GN=SQSTM1 PE=1 SV=1	1	9	9	9	3	0	0	0	2	9	1	3	0	0	0	2	9	1	3	0	0	0	2	9	1	33.6	33.6	33.6	47.687	440	440	0	65.714	By MS/MS				By matching	By MS/MS	By matching	8.9	0
Q13509	Q13509	15	1	1	Tubulin beta-3 chain	TUBB3	sp|Q13509|TBB3_HUMAN Tubulin beta-3 chain OS=Homo sapiens OX=9606 GN=TUBB3 PE=1 SV=2	1	15	1	1	14	0	12	9	14	14	10	1	0	0	0	1	1	0	1	0	0	0	1	1	0	33.1	2.7	2.7	50.432	450	450	0	3.8514	By MS/MS		By matching	By matching	By MS/MS	By MS/MS	By matching	32.9	0
Q13526	Q13526	2	2	2	Peptidyl-prolyl cis-trans isomerase NIMA-interacting 1	PIN1	sp|Q13526|PIN1_HUMAN Peptidyl-prolyl cis-trans isomerase NIMA-interacting 1 OS=Homo sapiens OX=9606 GN=PIN1 PE=1 SV=1	1	2	2	2	0	0	0	0	0	2	0	0	0	0	0	0	2	0	0	0	0	0	0	2	0	15.3	15.3	15.3	18.243	163	163	0	5.3433						By MS/MS		0	0
Q13541	Q13541	1	1	1	Eukaryotic translation initiation factor 4E-binding protein 1	EIF4EBP1	sp|Q13541|4EBP1_HUMAN Eukaryotic translation initiation factor 4E-binding protein 1 OS=Homo sapiens OX=9606 GN=EIF4EBP1 PE=1 SV=3	1	1	1	1	0	0	0	0	0	1	0	0	0	0	0	0	1	0	0	0	0	0	0	1	0	10.2	10.2	10.2	12.58	118	118	0	23.323						By MS/MS		0	0
Q13542	Q13542	1	1	1	Eukaryotic translation initiation factor 4E-binding protein 2	EIF4EBP2	sp|Q13542|4EBP2_HUMAN Eukaryotic translation initiation factor 4E-binding protein 2 OS=Homo sapiens OX=9606 GN=EIF4EBP2 PE=1 SV=1	1	1	1	1	0	0	0	0	0	1	0	0	0	0	0	0	1	0	0	0	0	0	0	1	0	11.7	11.7	11.7	12.939	120	120	0.0074756	1.4047						By MS/MS		0	0
Q13547;Q92769	Q13547;Q92769	4;3	4;3	3;2	Histone deacetylase 1;Histone deacetylase 2	HDAC1;HDAC2	sp|Q13547|HDAC1_HUMAN Histone deacetylase 1 OS=Homo sapiens OX=9606 GN=HDAC1 PE=1 SV=1;sp|Q92769|HDAC2_HUMAN Histone deacetylase 2 OS=Homo sapiens OX=9606 GN=HDAC2 PE=1 SV=2	2	4	4	3	0	0	0	0	1	4	0	0	0	0	0	1	4	0	0	0	0	0	1	3	0	7.9	7.9	6.6	55.102	482	482;488	0	6.8775					By matching	By MS/MS		0	0
Q13561	Q13561	8	8	8	Dynactin subunit 2	DCTN2	sp|Q13561|DCTN2_HUMAN Dynactin subunit 2 OS=Homo sapiens OX=9606 GN=DCTN2 PE=1 SV=4	1	8	8	8	4	0	0	0	4	7	2	4	0	0	0	4	7	2	4	0	0	0	4	7	2	21.9	21.9	21.9	44.23	401	401	0	18.34	By MS/MS				By matching	By MS/MS	By matching	12	0
Q13596;O60749	Q13596	4;1	4;1	4;1	Sorting nexin-1	SNX1	sp|Q13596|SNX1_HUMAN Sorting nexin-1 OS=Homo sapiens OX=9606 GN=SNX1 PE=1 SV=3	2	4	4	4	3	0	0	1	1	4	0	3	0	0	1	1	4	0	3	0	0	1	1	4	0	9.2	9.2	9.2	59.069	522	522;519	0	18.552	By MS/MS			By matching	By matching	By MS/MS		6.5	0
Q13619	Q13619	5	5	3	Cullin-4A	CUL4A	sp|Q13619|CUL4A_HUMAN Cullin-4A OS=Homo sapiens OX=9606 GN=CUL4A PE=1 SV=3	1	5	5	3	2	0	0	0	1	5	0	2	0	0	0	1	5	0	1	0	0	0	0	3	0	5.9	5.9	3.6	87.679	759	759	0	7.4591	By matching				By MS/MS	By MS/MS		2.5	0
Q13620	Q13620	4	2	2	Cullin-4B	CUL4B	sp|Q13620|CUL4B_HUMAN Cullin-4B OS=Homo sapiens OX=9606 GN=CUL4B PE=1 SV=4	1	4	2	2	2	0	0	0	2	4	1	1	0	0	0	1	2	1	1	0	0	0	1	2	1	5.1	3.2	3.2	103.98	913	913	0	4.8011	By MS/MS				By MS/MS	By MS/MS	By matching	2.3	0
Q13630	Q13630	2	2	2	GDP-L-fucose synthase	TSTA3	sp|Q13630|FCL_HUMAN GDP-L-fucose synthase OS=Homo sapiens OX=9606 GN=TSTA3 PE=1 SV=1	1	2	2	2	1	0	0	0	1	2	0	1	0	0	0	1	2	0	1	0	0	0	1	2	0	5.9	5.9	5.9	35.892	321	321	0.00068213	3.0462	By MS/MS				By matching	By MS/MS		3.7	0
Q13637	Q13637	4	4	4	Ras-related protein Rab-32	RAB32	sp|Q13637|RAB32_HUMAN Ras-related protein Rab-32 OS=Homo sapiens OX=9606 GN=RAB32 PE=1 SV=3	1	4	4	4	0	0	0	0	0	3	2	0	0	0	0	0	3	2	0	0	0	0	0	3	2	17.8	17.8	17.8	24.997	225	225	0	6.996						By MS/MS	By MS/MS	0	0
Q13642	Q13642	5	5	5	Four and a half LIM domains protein 1	FHL1	sp|Q13642|FHL1_HUMAN Four and a half LIM domains protein 1 OS=Homo sapiens OX=9606 GN=FHL1 PE=1 SV=4	1	5	5	5	0	0	0	0	0	5	0	0	0	0	0	0	5	0	0	0	0	0	0	5	0	18.9	18.9	18.9	36.263	323	323	0	12.006						By MS/MS		0	0
Q13643	Q13643	3	3	3	Four and a half LIM domains protein 3	FHL3	sp|Q13643|FHL3_HUMAN Four and a half LIM domains protein 3 OS=Homo sapiens OX=9606 GN=FHL3 PE=1 SV=4	1	3	3	3	2	0	0	0	1	3	0	2	0	0	0	1	3	0	2	0	0	0	1	3	0	9.6	9.6	9.6	31.192	280	280	0	7.3918	By MS/MS				By matching	By MS/MS		7.1	0
Q13685	Q13685	1	1	1	Angio-associated migratory cell protein	AAMP	sp|Q13685|AAMP_HUMAN Angio-associated migratory cell protein OS=Homo sapiens OX=9606 GN=AAMP PE=1 SV=2	1	1	1	1	0	0	0	0	0	1	0	0	0	0	0	0	1	0	0	0	0	0	0	1	0	3.2	3.2	3.2	46.75	434	434	0.00064725	2.4378						By MS/MS		0	0
Q13740	Q13740	1	1	1	CD166 antigen	ALCAM	sp|Q13740|CD166_HUMAN CD166 antigen OS=Homo sapiens OX=9606 GN=ALCAM PE=1 SV=2	1	1	1	1	1	0	0	0	1	0	0	1	0	0	0	1	0	0	1	0	0	0	1	0	0	2.4	2.4	2.4	65.102	583	583	0.001278	2.299	By MS/MS				By MS/MS			2.4	0
Q13813	Q13813	84	84	84	Spectrin alpha chain, non-erythrocytic 1	SPTAN1	sp|Q13813|SPTN1_HUMAN Spectrin alpha chain, non-erythrocytic 1 OS=Homo sapiens OX=9606 GN=SPTAN1 PE=1 SV=3	1	84	84	84	59	0	27	23	50	58	6	59	0	27	23	50	58	6	59	0	27	23	50	58	6	39.2	39.2	39.2	284.54	2472	2472	0	323.31	By MS/MS		By MS/MS	By matching	By MS/MS	By MS/MS	By MS/MS	29.7	0
Q13838	Q13838	13	13	4	Spliceosome RNA helicase DDX39B	DDX39B	sp|Q13838|DX39B_HUMAN Spliceosome RNA helicase DDX39B OS=Homo sapiens OX=9606 GN=DDX39B PE=1 SV=1	1	13	13	4	11	0	5	4	6	10	3	11	0	5	4	6	10	3	3	0	1	1	1	2	0	32.2	32.2	11.7	48.991	428	428	0	59.559	By MS/MS		By matching	By MS/MS	By MS/MS	By MS/MS	By matching	29	0
Q13867	Q13867	3	3	3	Bleomycin hydrolase	BLMH	sp|Q13867|BLMH_HUMAN Bleomycin hydrolase OS=Homo sapiens OX=9606 GN=BLMH PE=1 SV=1	1	3	3	3	3	0	0	0	0	2	1	3	0	0	0	0	2	1	3	0	0	0	0	2	1	10.5	10.5	10.5	52.562	455	455	0	8.9299	By MS/MS					By matching	By MS/MS	10.5	0
Q13895	Q13895	1	1	1	Bystin	BYSL	sp|Q13895|BYST_HUMAN Bystin OS=Homo sapiens OX=9606 GN=BYSL PE=1 SV=3	1	1	1	1	0	0	0	0	0	1	0	0	0	0	0	0	1	0	0	0	0	0	0	1	0	4.6	4.6	4.6	49.601	437	437	0	3.2078						By MS/MS		0	0
Q13951	Q13951	2	2	2	Core-binding factor subunit beta	CBFB	sp|Q13951|PEBB_HUMAN Core-binding factor subunit beta OS=Homo sapiens OX=9606 GN=CBFB PE=1 SV=2	1	2	2	2	1	0	0	0	0	1	0	1	0	0	0	0	1	0	1	0	0	0	0	1	0	13.2	13.2	13.2	21.508	182	182	0	5.4468	By MS/MS					By MS/MS		8.8	0
Q14019	Q14019	9	9	9	Coactosin-like protein	COTL1	sp|Q14019|COTL1_HUMAN Coactosin-like protein OS=Homo sapiens OX=9606 GN=COTL1 PE=1 SV=3	1	9	9	9	9	1	4	6	7	8	3	9	1	4	6	7	8	3	9	1	4	6	7	8	3	57.7	57.7	57.7	15.945	142	142	0	41.337	By MS/MS	By matching	By MS/MS	By matching	By MS/MS	By MS/MS	By MS/MS	57.7	5.6
Q14061	Q14061	1	1	1	Cytochrome c oxidase copper chaperone	COX17	sp|Q14061|COX17_HUMAN Cytochrome c oxidase copper chaperone OS=Homo sapiens OX=9606 GN=COX17 PE=1 SV=2	1	1	1	1	1	0	1	0	0	1	0	1	0	1	0	0	1	0	1	0	1	0	0	1	0	20.6	20.6	20.6	6.9151	63	63	0.00066979	2.7664	By MS/MS		By matching			By MS/MS		20.6	0
Q14103	Q14103	9	9	8	Heterogeneous nuclear ribonucleoprotein D0	HNRNPD	sp|Q14103|HNRPD_HUMAN Heterogeneous nuclear ribonucleoprotein D0 OS=Homo sapiens OX=9606 GN=HNRNPD PE=1 SV=1	1	9	9	8	7	0	5	4	5	7	3	7	0	5	4	5	7	3	6	0	4	3	4	6	2	24.8	24.8	22.5	38.434	355	355	0	36.805	By MS/MS		By MS/MS	By MS/MS	By MS/MS	By MS/MS	By MS/MS	17.5	0
Q14116	Q14116	2	2	2	Interleukin-18	IL18	sp|Q14116|IL18_HUMAN Interleukin-18 OS=Homo sapiens OX=9606 GN=IL18 PE=1 SV=1	1	2	2	2	2	0	2	2	2	2	2	2	0	2	2	2	2	2	2	0	2	2	2	2	2	8.8	8.8	8.8	22.326	193	193	0	7.8158	By MS/MS		By matching	By MS/MS	By MS/MS	By MS/MS	By matching	8.8	0
Q14126	Q14126	1	1	1	Desmoglein-2	DSG2	sp|Q14126|DSG2_HUMAN Desmoglein-2 OS=Homo sapiens OX=9606 GN=DSG2 PE=1 SV=2	1	1	1	1	0	0	0	0	1	1	0	0	0	0	0	1	1	0	0	0	0	0	1	1	0	0.8	0.8	0.8	122.29	1118	1118	0.0012516	2.1234					By matching	By MS/MS		0	0
Q14137	Q14137	2	2	2	Ribosome biogenesis protein BOP1	BOP1	sp|Q14137|BOP1_HUMAN Ribosome biogenesis protein BOP1 OS=Homo sapiens OX=9606 GN=BOP1 PE=1 SV=2	1	2	2	2	1	0	0	0	1	2	0	1	0	0	0	1	2	0	1	0	0	0	1	2	0	2.7	2.7	2.7	83.629	746	746	0	6.2235	By MS/MS				By matching	By MS/MS		1.3	0
Q14152	Q14152	35	35	35	Eukaryotic translation initiation factor 3 subunit A	EIF3A	sp|Q14152|EIF3A_HUMAN Eukaryotic translation initiation factor 3 subunit A OS=Homo sapiens OX=9606 GN=EIF3A PE=1 SV=1	1	35	35	35	18	0	1	2	5	29	1	18	0	1	2	5	29	1	18	0	1	2	5	29	1	26.5	26.5	26.5	166.57	1382	1382	0	68.564	By MS/MS		By matching	By matching	By MS/MS	By MS/MS	By matching	12.8	0
Q14157	Q14157	6	6	6	Ubiquitin-associated protein 2-like	UBAP2L	sp|Q14157|UBP2L_HUMAN Ubiquitin-associated protein 2-like OS=Homo sapiens OX=9606 GN=UBAP2L PE=1 SV=2	1	6	6	6	3	0	0	0	1	5	0	3	0	0	0	1	5	0	3	0	0	0	1	5	0	7.5	7.5	7.5	114.53	1087	1087	0	17.924	By MS/MS				By matching	By MS/MS		3.1	0
Q14166	Q14166	5	5	5	Tubulin--tyrosine ligase-like protein 12	TTLL12	sp|Q14166|TTL12_HUMAN Tubulin--tyrosine ligase-like protein 12 OS=Homo sapiens OX=9606 GN=TTLL12 PE=1 SV=2	1	5	5	5	2	0	0	0	1	4	0	2	0	0	0	1	4	0	2	0	0	0	1	4	0	11.2	11.2	11.2	74.403	644	644	0	8.8795	By MS/MS				By matching	By MS/MS		5	0
Q14192	Q14192	7	7	7	Four and a half LIM domains protein 2	FHL2	sp|Q14192|FHL2_HUMAN Four and a half LIM domains protein 2 OS=Homo sapiens OX=9606 GN=FHL2 PE=1 SV=3	1	7	7	7	3	0	1	1	3	5	0	3	0	1	1	3	5	0	3	0	1	1	3	5	0	29.7	29.7	29.7	32.193	279	279	0	16.686	By MS/MS		By matching	By matching	By MS/MS	By MS/MS		11.1	0
Q14195;Q14117	Q14195	10;1	9;1	8;0	Dihydropyrimidinase-related protein 3	DPYSL3	sp|Q14195|DPYL3_HUMAN Dihydropyrimidinase-related protein 3 OS=Homo sapiens OX=9606 GN=DPYSL3 PE=1 SV=1	2	10	9	8	5	0	1	1	6	8	2	5	0	1	1	6	7	2	5	0	1	1	6	6	2	23.3	20.5	19.3	61.963	570	570;519	0	32.969	By MS/MS		By matching	By matching	By MS/MS	By MS/MS	By matching	10.9	0
Q14203	Q14203	5	5	5	Dynactin subunit 1	DCTN1	sp|Q14203|DCTN1_HUMAN Dynactin subunit 1 OS=Homo sapiens OX=9606 GN=DCTN1 PE=1 SV=3	1	5	5	5	2	0	0	0	2	4	0	2	0	0	0	2	4	0	2	0	0	0	2	4	0	4.6	4.6	4.6	141.69	1278	1278	0	9.7371	By MS/MS				By matching	By MS/MS		2.2	0
Q14204	Q14204	66	66	66	Cytoplasmic dynein 1 heavy chain 1	DYNC1H1	sp|Q14204|DYHC1_HUMAN Cytoplasmic dynein 1 heavy chain 1 OS=Homo sapiens OX=9606 GN=DYNC1H1 PE=1 SV=5	1	66	66	66	32	2	8	6	22	56	5	32	2	8	6	22	56	5	32	2	8	6	22	56	5	15.5	15.5	15.5	532.4	4646	4646	0	171.46	By MS/MS	By matching	By matching	By matching	By MS/MS	By MS/MS	By MS/MS	7.9	0.4
Q14232	Q14232	2	2	2	Translation initiation factor eIF-2B subunit alpha	EIF2B1	sp|Q14232|EI2BA_HUMAN Translation initiation factor eIF-2B subunit alpha OS=Homo sapiens OX=9606 GN=EIF2B1 PE=1 SV=1	1	2	2	2	1	0	0	0	0	1	0	1	0	0	0	0	1	0	1	0	0	0	0	1	0	6.2	6.2	6.2	33.712	305	305	0.0018587	2.0001	By MS/MS					By MS/MS		3	0
Q14240	Q14240	12	1	1	Eukaryotic initiation factor 4A-II;Eukaryotic initiation factor 4A-II, N-terminally processed	EIF4A2	sp|Q14240|IF4A2_HUMAN Eukaryotic initiation factor 4A-II OS=Homo sapiens OX=9606 GN=EIF4A2 PE=1 SV=2	1	12	1	1	7	0	5	3	6	10	6	1	0	0	0	1	1	0	1	0	0	0	1	1	0	30.2	3.7	3.7	46.402	407	407	0.0012469	2.0887	By MS/MS		By matching	By matching	By matching	By MS/MS	By matching	21.6	0
Q14247	Q14247	19	19	19	Src substrate cortactin	CTTN	sp|Q14247|SRC8_HUMAN Src substrate cortactin OS=Homo sapiens OX=9606 GN=CTTN PE=1 SV=2	1	19	19	19	14	0	3	6	12	15	2	14	0	3	6	12	15	2	14	0	3	6	12	15	2	34.4	34.4	34.4	61.585	550	550	0	65.14	By MS/MS		By matching	By matching	By MS/MS	By MS/MS	By matching	25.8	0
Q14257	Q14257	2	2	2	Reticulocalbin-2	RCN2	sp|Q14257|RCN2_HUMAN Reticulocalbin-2 OS=Homo sapiens OX=9606 GN=RCN2 PE=1 SV=1	1	2	2	2	0	0	0	0	0	2	0	0	0	0	0	0	2	0	0	0	0	0	0	2	0	5.7	5.7	5.7	36.876	317	317	0.0042296	1.7761						By MS/MS		0	0
Q14258	Q14258	2	2	2	E3 ubiquitin/ISG15 ligase TRIM25	TRIM25	sp|Q14258|TRI25_HUMAN E3 ubiquitin/ISG15 ligase TRIM25 OS=Homo sapiens OX=9606 GN=TRIM25 PE=1 SV=2	1	2	2	2	1	0	0	0	0	2	0	1	0	0	0	0	2	0	1	0	0	0	0	2	0	3.8	3.8	3.8	70.973	630	630	0	6.8594	By MS/MS					By MS/MS		1.9	0
Q14315	Q14315	35	20	20	Filamin-C	FLNC	sp|Q14315|FLNC_HUMAN Filamin-C OS=Homo sapiens OX=9606 GN=FLNC PE=1 SV=3	1	35	20	20	22	0	11	10	19	30	13	8	0	0	0	7	17	4	8	0	0	0	7	17	4	14.5	9.1	9.1	291.02	2725	2725	0	71.405	By MS/MS		By matching	By matching	By MS/MS	By MS/MS	By matching	8.8	0
Q14376	Q14376	1	1	1	UDP-glucose 4-epimerase	GALE	sp|Q14376|GALE_HUMAN UDP-glucose 4-epimerase OS=Homo sapiens OX=9606 GN=GALE PE=1 SV=2	1	1	1	1	0	0	0	0	0	1	0	0	0	0	0	0	1	0	0	0	0	0	0	1	0	4	4	4	38.281	348	348	0.0064403	1.5292						By MS/MS		0	0
Q14444	Q14444	7	7	7	Caprin-1	CAPRIN1	sp|Q14444|CAPR1_HUMAN Caprin-1 OS=Homo sapiens OX=9606 GN=CAPRIN1 PE=1 SV=2	1	7	7	7	5	0	3	2	4	6	3	5	0	3	2	4	6	3	5	0	3	2	4	6	3	10	10	10	78.365	709	709	0	22.68	By MS/MS		By MS/MS	By MS/MS	By MS/MS	By MS/MS	By MS/MS	6.9	0
Q14498	Q14498	5	5	5	RNA-binding protein 39	RBM39	sp|Q14498|RBM39_HUMAN RNA-binding protein 39 OS=Homo sapiens OX=9606 GN=RBM39 PE=1 SV=2	1	5	5	5	3	0	1	1	1	5	1	3	0	1	1	1	5	1	3	0	1	1	1	5	1	11.7	11.7	11.7	59.379	530	530	0	15.697	By MS/MS		By matching	By matching	By matching	By MS/MS	By matching	6.6	0
Q14566	Q14566	14	14	14	DNA replication licensing factor MCM6	MCM6	sp|Q14566|MCM6_HUMAN DNA replication licensing factor MCM6 OS=Homo sapiens OX=9606 GN=MCM6 PE=1 SV=1	1	14	14	14	3	0	0	1	1	12	1	3	0	0	1	1	12	1	3	0	0	1	1	12	1	17.3	17.3	17.3	92.888	821	821	0	34.451	By MS/MS			By matching	By matching	By MS/MS	By matching	4.1	0
Q14677	Q14677	4	4	4	Clathrin interactor 1	CLINT1	sp|Q14677|EPN4_HUMAN Clathrin interactor 1 OS=Homo sapiens OX=9606 GN=CLINT1 PE=1 SV=1	1	4	4	4	3	0	0	0	1	3	0	3	0	0	0	1	3	0	3	0	0	0	1	3	0	8.6	8.6	8.6	68.259	625	625	0	8.6355	By MS/MS				By matching	By MS/MS		6.6	0
Q14683	Q14683	4	4	4	Structural maintenance of chromosomes protein 1A	SMC1A	sp|Q14683|SMC1A_HUMAN Structural maintenance of chromosomes protein 1A OS=Homo sapiens OX=9606 GN=SMC1A PE=1 SV=2	1	4	4	4	0	0	0	0	1	4	0	0	0	0	0	1	4	0	0	0	0	0	1	4	0	3.1	3.1	3.1	143.23	1233	1233	0	7.4166					By matching	By MS/MS		0	0
Q14696	Q14696	3	3	3	LDLR chaperone MESD	MESDC2	sp|Q14696|MESD_HUMAN LRP chaperone MESD OS=Homo sapiens OX=9606 GN=MESD PE=1 SV=2	1	3	3	3	3	0	2	1	3	2	1	3	0	2	1	3	2	1	3	0	2	1	3	2	1	12	12	12	26.076	234	234	0	4.1945	By MS/MS		By matching	By matching	By matching	By MS/MS	By matching	12	0
Q14697	Q14697	27	27	27	Neutral alpha-glucosidase AB	GANAB	sp|Q14697|GANAB_HUMAN Neutral alpha-glucosidase AB OS=Homo sapiens OX=9606 GN=GANAB PE=1 SV=3	1	27	27	27	19	0	12	8	13	24	7	19	0	12	8	13	24	7	19	0	12	8	13	24	7	30.9	30.9	30.9	106.87	944	944	0	187.42	By MS/MS		By MS/MS	By MS/MS	By MS/MS	By MS/MS	By MS/MS	24.2	0
Q14739	Q14739	1	1	1	Lamin-B receptor	LBR	sp|Q14739|LBR_HUMAN Lamin-B receptor OS=Homo sapiens OX=9606 GN=LBR PE=1 SV=2	1	1	1	1	0	0	0	1	1	1	0	0	0	0	1	1	1	0	0	0	0	1	1	1	0	1.3	1.3	1.3	70.702	615	615	0.0053254	1.6183				By matching	By matching	By MS/MS		0	0
Q14764	Q14764	6	6	6	Major vault protein	MVP	sp|Q14764|MVP_HUMAN Major vault protein OS=Homo sapiens OX=9606 GN=MVP PE=1 SV=4	1	6	6	6	4	0	0	0	2	5	0	4	0	0	0	2	5	0	4	0	0	0	2	5	0	9.3	9.3	9.3	99.326	893	893	0	7.8718	By MS/MS				By matching	By MS/MS		6.8	0
Q14839;Q8TDI0;Q12873	Q14839;Q8TDI0	3;2;1	3;2;1	3;2;1	Chromodomain-helicase-DNA-binding protein 4;Chromodomain-helicase-DNA-binding protein 5	CHD4;CHD5	sp|Q14839|CHD4_HUMAN Chromodomain-helicase-DNA-binding protein 4 OS=Homo sapiens OX=9606 GN=CHD4 PE=1 SV=2;sp|Q8TDI0|CHD5_HUMAN Chromodomain-helicase-DNA-binding protein 5 OS=Homo sapiens OX=9606 GN=CHD5 PE=1 SV=1	3	3	3	3	2	0	0	0	2	1	0	2	0	0	0	2	1	0	2	0	0	0	2	1	0	2.1	2.1	2.1	218	1912	1912;1954;2000	0	3.8898	By MS/MS				By matching	By MS/MS		1.5	0
Q14847	Q14847	11	11	11	LIM and SH3 domain protein 1	LASP1	sp|Q14847|LASP1_HUMAN LIM and SH3 domain protein 1 OS=Homo sapiens OX=9606 GN=LASP1 PE=1 SV=2	1	11	11	11	9	0	6	6	8	11	5	9	0	6	6	8	11	5	9	0	6	6	8	11	5	38.7	38.7	38.7	29.717	261	261	0	66.471	By MS/MS		By matching	By MS/MS	By MS/MS	By MS/MS	By MS/MS	33.3	0
Q14914	Q14914	8	8	8	Prostaglandin reductase 1	PTGR1	sp|Q14914|PTGR1_HUMAN Prostaglandin reductase 1 OS=Homo sapiens OX=9606 GN=PTGR1 PE=1 SV=2	1	8	8	8	3	0	1	0	5	5	1	3	0	1	0	5	5	1	3	0	1	0	5	5	1	25.5	25.5	25.5	35.869	329	329	0	30.492	By MS/MS		By matching		By MS/MS	By MS/MS	By matching	12.8	0
Q14919	Q14919	3	3	3	Dr1-associated corepressor	DRAP1	sp|Q14919|NC2A_HUMAN Dr1-associated corepressor OS=Homo sapiens OX=9606 GN=DRAP1 PE=1 SV=3	1	3	3	3	2	0	0	0	1	2	0	2	0	0	0	1	2	0	2	0	0	0	1	2	0	15.6	15.6	15.6	22.35	205	205	0	6.3492	By MS/MS				By matching	By MS/MS		10.7	0
Q14974	Q14974	19	19	19	Importin subunit beta-1	KPNB1	sp|Q14974|IMB1_HUMAN Importin subunit beta-1 OS=Homo sapiens OX=9606 GN=KPNB1 PE=1 SV=2	1	19	19	19	14	0	5	3	8	14	3	14	0	5	3	8	14	3	14	0	5	3	8	14	3	28.9	28.9	28.9	97.169	876	876	0	166.45	By MS/MS		By matching	By MS/MS	By MS/MS	By MS/MS	By MS/MS	21.2	0
Q14978	Q14978	8	8	8	Nucleolar and coiled-body phosphoprotein 1	NOLC1	sp|Q14978|NOLC1_HUMAN Nucleolar and coiled-body phosphoprotein 1 OS=Homo sapiens OX=9606 GN=NOLC1 PE=1 SV=2	1	8	8	8	5	0	3	3	0	6	0	5	0	3	3	0	6	0	5	0	3	3	0	6	0	12	12	12	73.602	699	699	0	19.477	By MS/MS		By MS/MS	By matching		By MS/MS		6.9	0
[truncated: 604 more rows]
[truncated: 48 more columns]

## Sheet: Protein list with intensities
Protein IDs	Majority protein IDs	100 cells	20 cells	single1	single2	single3	single4 (large)	blank
[truncated: 1,801 more rows]
